# Supplementary material for: Cancers and COVID-19 Risk: A Mendelian Randomization Study
Source: MDPI journal article supplement (doi:10.3390/cancers14092086), 2022-04-22
Supplement: s1 [file s1]

## Supplementary Materials

### Cancers and COVID-19 Risk: A Mendelian Randomization Study

Zengbin Li <sup>1</sup>, Yudong Wei <sup>1</sup>, Guixian Zhu <sup>1</sup>, Mengjie Wang <sup>1</sup> and Lei Zhang <sup>1,2,3,4,\*</sup>

<sup>1</sup> China-Australia Joint Research Center for Infectious Diseases, School of Public Health, Xi'an Jiaotong University Health Science Center, Xi'an 710061, China; zengbinli@stu.xjtu.edu.cn (Z.L.); weiyudong@stu.xjtu.edu.cn (Y.W.); xianxianshell@stu.xjtu.edu.cn (G.Z.); mjwang0211@stu.xjtu.edu.cn (M.W.)

<sup>2</sup> Melbourne Sexual Health Centre, Alfred Health, Melbourne, VIC 3053, Australia

<sup>3</sup> Central Clinical School, Faculty of Medicine, Nursing and Health Sciences, Monash University, Melbourne, VIC 3800, Australia

<sup>4</sup> Department of Epidemiology and Biostatistics, College of Public Health, Zhengzhou University, Zhengzhou 450001, China

\*Correspondence: lei.zhang1@monash.edu; Tel.: +86-29-82655135

**Table S1.** Excluded cancers with insufficient SNPs

|           | Cancer               |                                                                                   | GWAS ID                                  | Year | Cases | Controls |
|-----------|----------------------|-----------------------------------------------------------------------------------|------------------------------------------|------|-------|----------|
| Discovery | Stomach cancer       | Benign neoplasm: Stomach                                                          | finn-b-CD2_BENIGN_STOMACH                | 2021 | 1252  | 217,540  |
|           |                      | Malignant neoplasm of stomach                                                     | finn-b-C3_STOMACH_EXALLC                 | 2021 | 633   | 174,006  |
|           | Pancreatic cancer    | Pancreatic cancer                                                                 | ieu-a-822                                | 2009 | 1896  | 1939     |
|           |                      | Pancreas benign neoplasm                                                          | finn-b-CD2_BENIGN_PANCREAS_EXALLC        | 2021 | 163   | 180,666  |
|           | Oesophagus cancer    | Malignant neoplasm of oesophagus                                                  | finn-b-C3_OESOPHAGUS                     | 2021 | 144   | 218,648  |
|           |                      | Benign neoplasm: Oesophagus                                                       | finn-b-CD2_BENIGN_OESOPHAGUS             | 2021 | 232   | 218,560  |
|           | Kidney cancer        | Malignant neoplasm of kidney, except renal pelvis                                 | ukb-b-1316                               | 2018 | 1114  | 461,896  |
|           |                      | Malignant neoplasm of kidney, except renal pelvis                                 | finn-b-C3_KIDNEY_NOTRENALPELVIS_EXALLC   | 2021 | 971   | 174,006  |
|           |                      | Benign neoplasm: Kidney                                                           | finn-b-CD2_BENIGN_KIDNEY_EXALLC          | 2021 | 381   | 180,506  |
|           |                      | Malignant neoplasm of kidney, except renal pelvis                                 | finn-b-C3_KIDNEY_NOTRENALPELVIS_EXALLC   | 2021 | 971   | 217,821  |
|           |                      | Secondary malignant neoplasm of liver                                             | ukb-b-16713                              | 2018 | 1139  | 461,871  |
|           |                      | Liver & bile duct cancer                                                          | ieu-b-4915                               | 2021 | 350   | 372,016  |
|           | Liver cancer         | Liver cell carcinoma                                                              | ieu-b-4953                               | 2021 | 168   | 372,016  |
|           |                      | Benign neoplasm: Liver                                                            | finn-b-CD2_BENIGN_LIVER                  | 2021 | 232   | 218,560  |
|           |                      | Benign neoplasm: Liver/bile ducts                                                 | finn-b-CD2_BENIGN_LIVE_BILE              | 2021 | 264   | 218,528  |
|           |                      | Malignant neoplasm of liver and intrahepatic bile ducts                           | finn-b-C3_LIVER_INTRAHEPATIC_BILE_DUCTS  | 2021 | 304   | 218,488  |
|           | Biliary tract cancer | Malignant neoplasm of other and unspecified parts of biliary tract                | finn-b-C3_BILIARY_TRACT                  | 2021 | 109   | 218,683  |
|           | Head and neck cancer | Gallbladder cancer                                                                | ieu-a-1057                               | 2012 | 41    | 866      |
|           |                      | Head and neck cancer                                                              | ieu-b-4912                               | 2021 | 1106  | 372,016  |
|           |                      | Benign lipomatous neoplasm of skin and subcutaneous tissue of head, face and neck | finn-b-CD2_BENIGN_LIPO_SKIN_HEADFACENECK | 2021 | 915   | 217,877  |

|                |                     |                                                                             |                                               |      |      |         |
|----------------|---------------------|-----------------------------------------------------------------------------|-----------------------------------------------|------|------|---------|
| Validati<br>on | Bladder<br>cancer   | Benign neoplasm: Connective and other soft tissue<br>of head, face and neck | finn-b-<br>CD2_BENIGN_CONNSOFT_HEADFACETRUNK  | 2021 | 262  | 218,530 |
|                |                     | Bladder cancer                                                              | ukb-b-8193                                    | 2018 | 1101 | 461,832 |
|                | Testis<br>cancer    | Malignant neoplasm of bladder                                               | ukb-d-C67                                     | 2018 | 1554 | 359,640 |
|                |                     | Benign neoplasm: Bladder                                                    | finn-b-CD2_BENIGN_BLADDER                     | 2021 | 109  | 218,683 |
|                | Brain<br>cancer     | Malignant neoplasm of bladder                                               | finn-b-C3_BLADDER                             | 2021 | 1115 | 217,677 |
|                |                     | Malignant neoplasm of testis                                                | finn-b-C3_TESTIS                              | 2021 | 199  | 95,014  |
|                | Multiple<br>myeloma | Brain cancer                                                                | ieu-b-4875                                    | 2021 | 606  | 372,016 |
|                |                     | Malignant neoplasm of brain                                                 | finn-b-C3_BRAIN                               | 2021 | 464  | 218,328 |
|                | Bone cancer         | Malignant neoplasm of eye, brain and central<br>nervous system              | finn-b-C3_EYE_BRAIN_NEURO                     | 2021 | 1446 | 217,346 |
|                |                     | Benign neoplasm: Brain, supratentorial                                      | finn-b-CD2_BENIGN_BRAIN_SUPRATENT             | 2021 | 218  | 218,574 |
|                | Lung cancer         | Multiple myeloma                                                            | ieu-b-4957                                    | 2021 | 601  | 372,016 |
|                |                     | Malignant neoplasm of bone and articular cartilage                          | finn-b-C3_BONE_CARTILAGE_EXALLC               | 2021 | 119  | 174,006 |
|                |                     | Benign neoplasm: Short bones of lower limb                                  | finn-b-CD2_BENIGN_BONE_SHORT_LOWER            | 2021 | 128  | 218,664 |
|                |                     | Benign neoplasm: Scapula and long bones of upper<br>limb                    | finn-b-<br>CD2_BENIGN_BONE_SCAPULA_LONG_UPPER | 2021 | 125  | 218,667 |
|                |                     | Benign neoplasm: Long bones of lower limb                                   | finn-b-CD2_BENIGN_BONE_LONG_LOWER             | 2021 | 443  | 218,349 |
|                |                     | Benign neoplasm: Bones of skull and face                                    | finn-b-CD2_BENIGN_BONE_SKULL_FACE             | 2021 | 120  | 218,672 |
|                | Lung cancer         | Non-small cell lung cancer                                                  | finn-b-C3_LUNG_NONSMALL                       | 2021 | 1627 | 217,165 |
|                |                     | Lung adenocarcinoma                                                         | ieu-a-965                                     | 2014 | 3442 | 14,894  |
|                |                     | Non-small cell lung cancer, adenocarcinoma                                  | finn-b-C3_NSCLC_ADENO                         | 2021 | 571  | 218,221 |
|                |                     | Non-small cell lung cancer, squamous                                        | finn-b-C3_NSCLC_SQUAM_EXALLC                  | 2021 | 365  | 174,004 |

|                      |                                                     |                                          |      |      |         |
|----------------------|-----------------------------------------------------|------------------------------------------|------|------|---------|
| Ovarian cancer       | Ovarian cancer                                      | ieu-b-4963                               | 2021 | 1218 | 198,523 |
| Endometrial cancer   | Uterine/endometrial cancer                          | ukb-b-13545                              | 2018 | 1151 | 461,782 |
| Thyroid cancer       | Benign neoplasm of thyroid gland                    | finn-b-CD2_BENIGN_THYROID                | 2021 | 455  | 218,337 |
| Melanoma             | Malignant melanoma of skin                          | finn-b-C3_MELANOMA_SKIN                  | 2021 | 98   | 218,694 |
|                      | Melanoma in situ                                    | finn-b-CD2_INSITU_MELANOMA               | 2021 | 393  | 218,399 |
| Colorectal cancer    | Colorectal cancer                                   | finn-b-C3_COLORECTAL                     | 2021 | 3022 | 215,770 |
|                      | Malignant neoplasm of colon                         | finn-b-C3_COLON                          | 2021 | 1803 | 216,989 |
|                      | Hodgkin lymphoma                                    | finn-b-CD2_HODGKIN_LYMPHOMA              | 2021 | 369  | 218,423 |
|                      | Other and unspecified types of non-Hodgkin lymphoma | finn-b-CD2_NONHODGKIN_NAS                | 2021 | 533  | 218,259 |
| Lymphoma             | Diffuse large B-cell lymphoma                       | finn-b-C3_DLBCL                          | 2021 | 209  | 218,583 |
|                      | Mature T/NK-cell lymphomas                          | finn-b-CD2_TNK_LYMPHOMA                  | 2021 | 150  | 218,642 |
|                      | Non-follicular lymphoma                             | finn-b-CD2_NONFOLLICULAR_LYMPHOMA        | 2021 | 1283 | 217,509 |
|                      | Follicular lymphoma                                 | finn-b-CD2_FOLLICULAR_LYMPHOMA_EXALLC    | 2021 | 522  | 180,756 |
| Oropharyngeal cancer | Oropharyngeal cancer                                | ieu-b-96                                 | 2016 | 1090 | 2928    |
|                      | cin/pre-cancer cells cervix                         | ukb-b-17507                              | 2018 | 1604 | 461,329 |
| Cervix cancer        | Carcinoma in situ of cervix uteri                   | finn-b-CD2_INSITU_CERVIX_UTERI           | 2021 | 298  | 123,281 |
|                      | Carcinoma in situ of cervix uteri, exocervix        | finn-b-CD2_INSITU_CERVIX_UTERI_EXOCERVIX | 2021 | 107  | 123,472 |

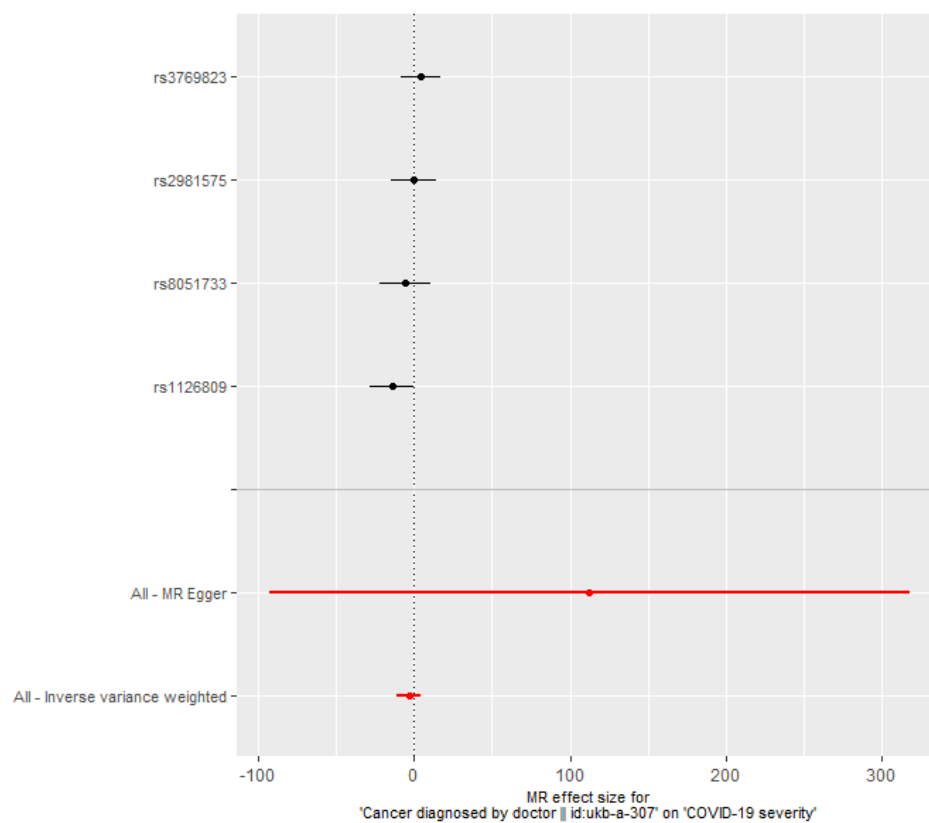

**Figure S1A.** The effect of each SNP in overall cancer on COVID-19 severity.

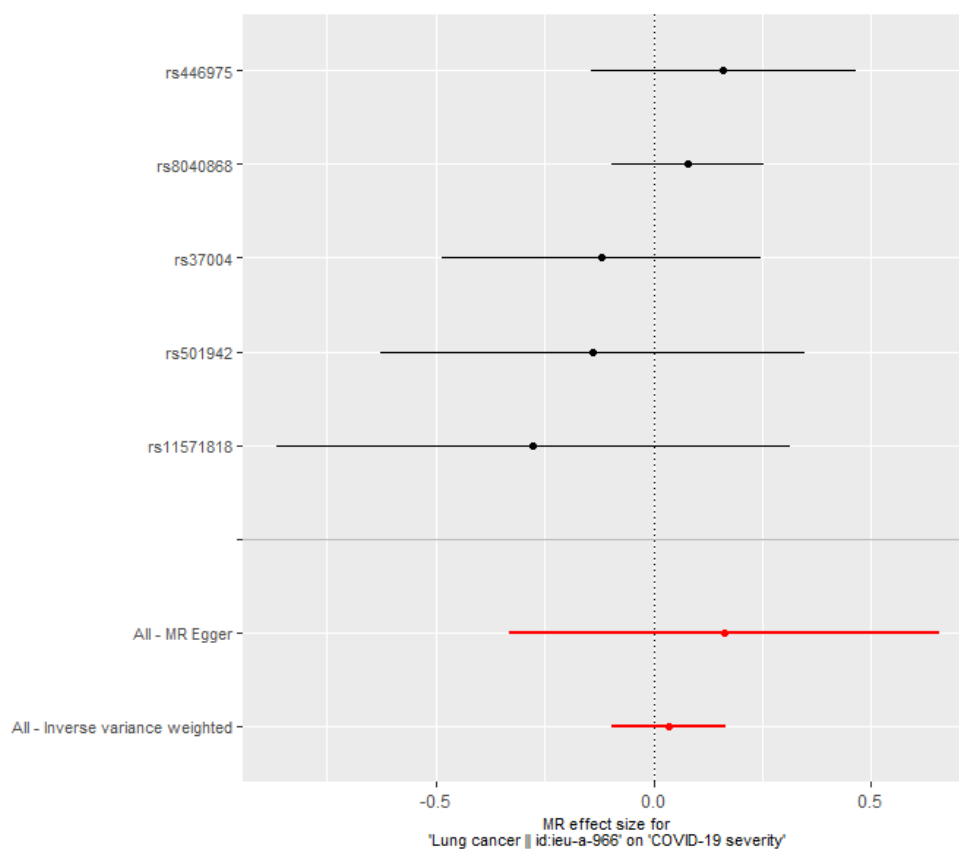

**Figure S1B.** The effect of each SNP in lung cancer on COVID-19 severity.

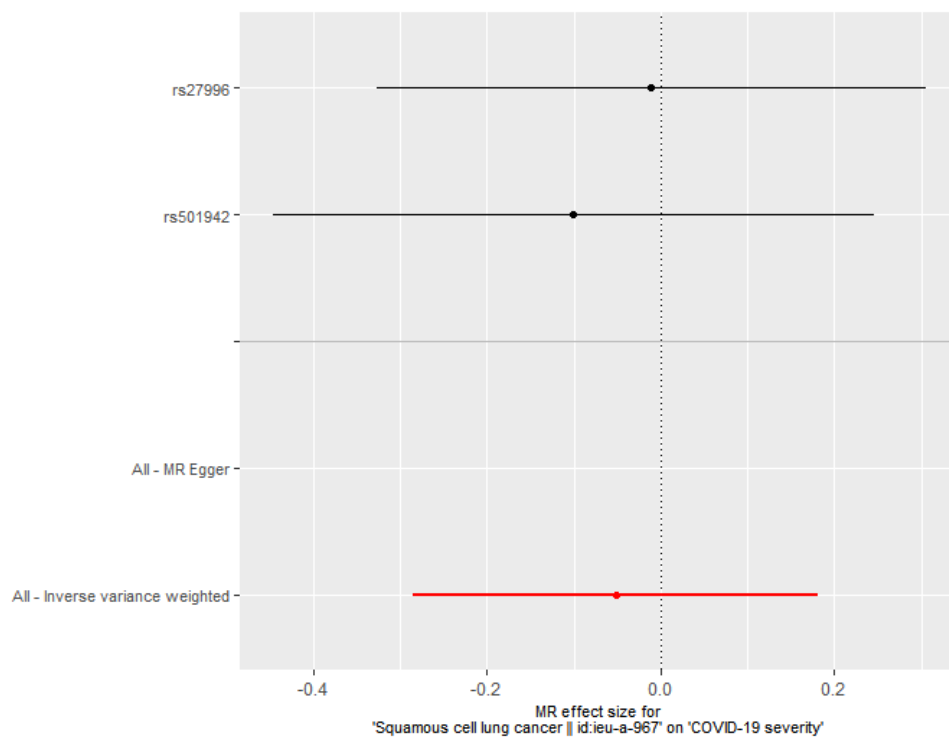

**Figure S1C.** The effect of each SNP in squamous cell lung cancer on COVID-19 severity.

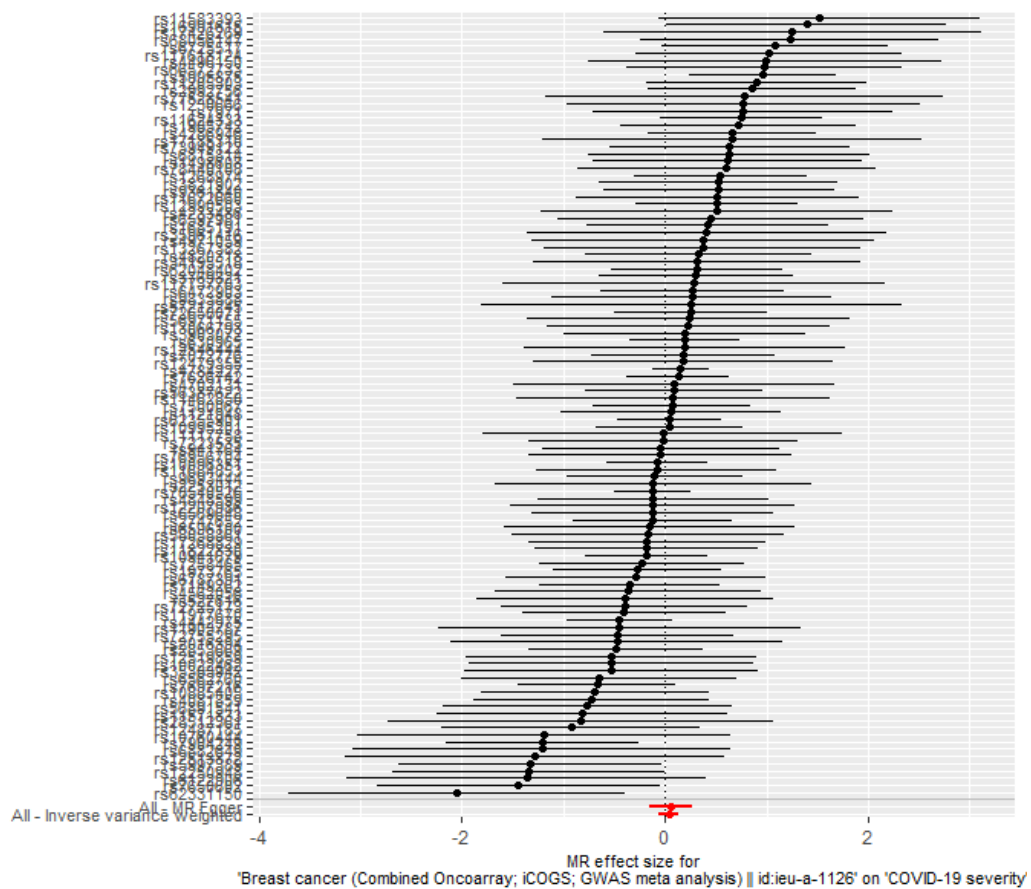

**Figure S1D.** The effect of each SNP in breast cancer on COVID-19 severity.

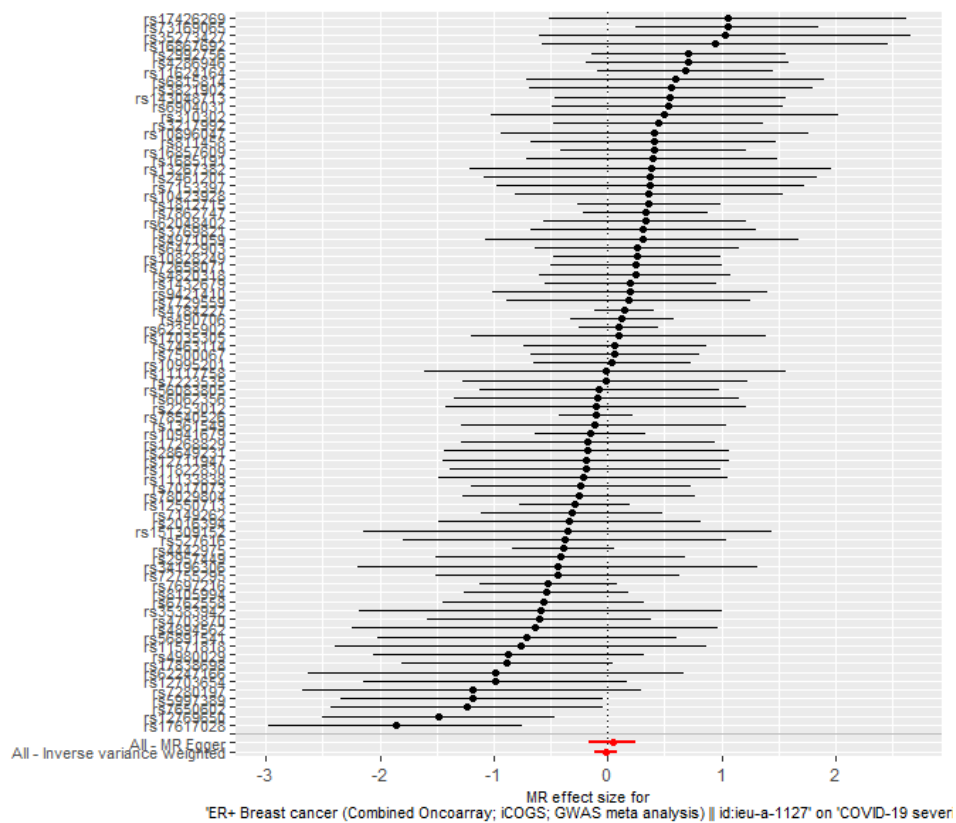

**Figure S1E.** The effect of each SNP in ER+ breast cancer on COVID-19 severity.

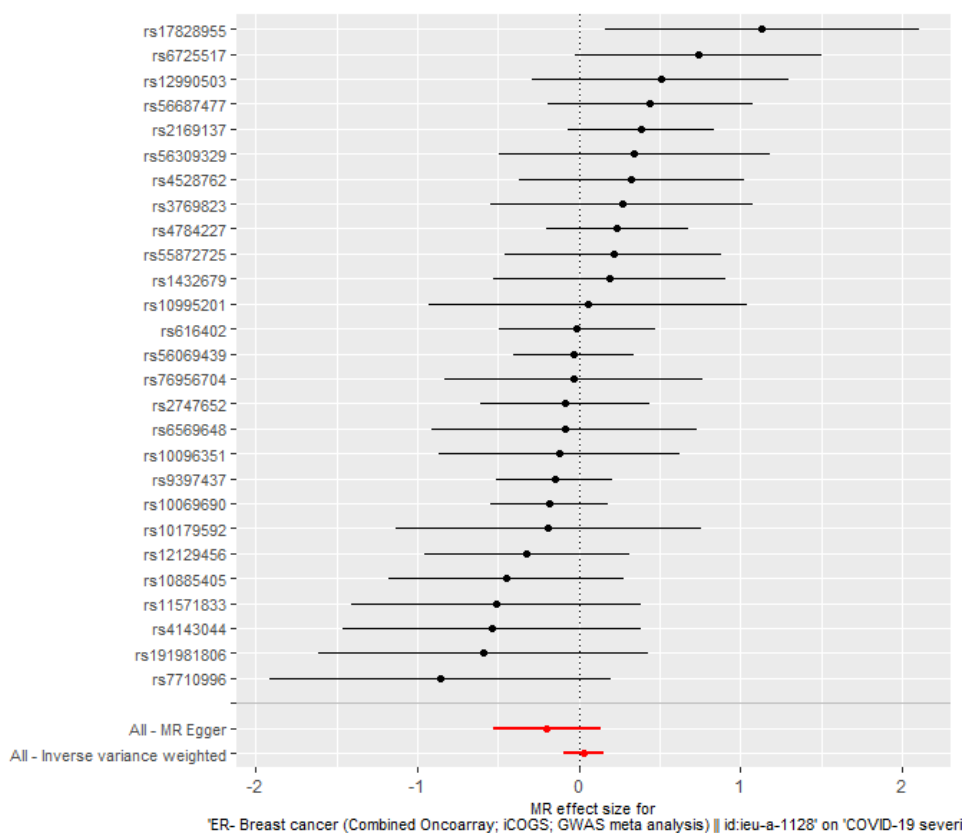

**Figure S1F.** The effect of each SNP in ER- breast cancer on COVID-19 severity.

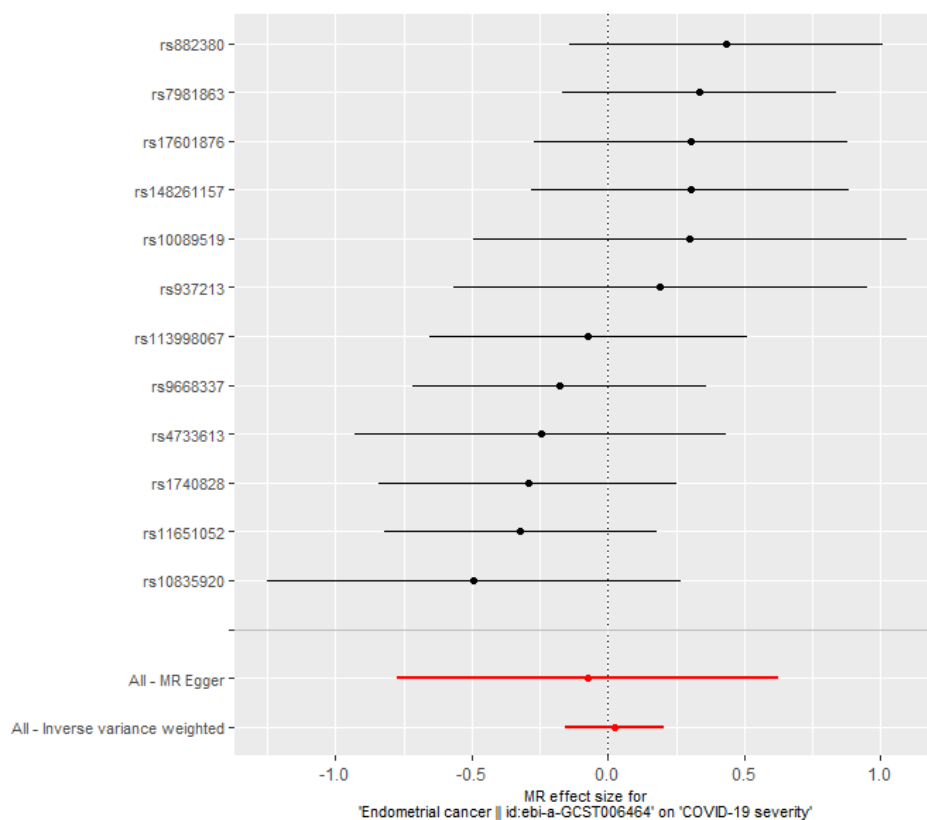

**Figure S1G.** The effect of each SNP in endometrial cancer on COVID-19 severity.

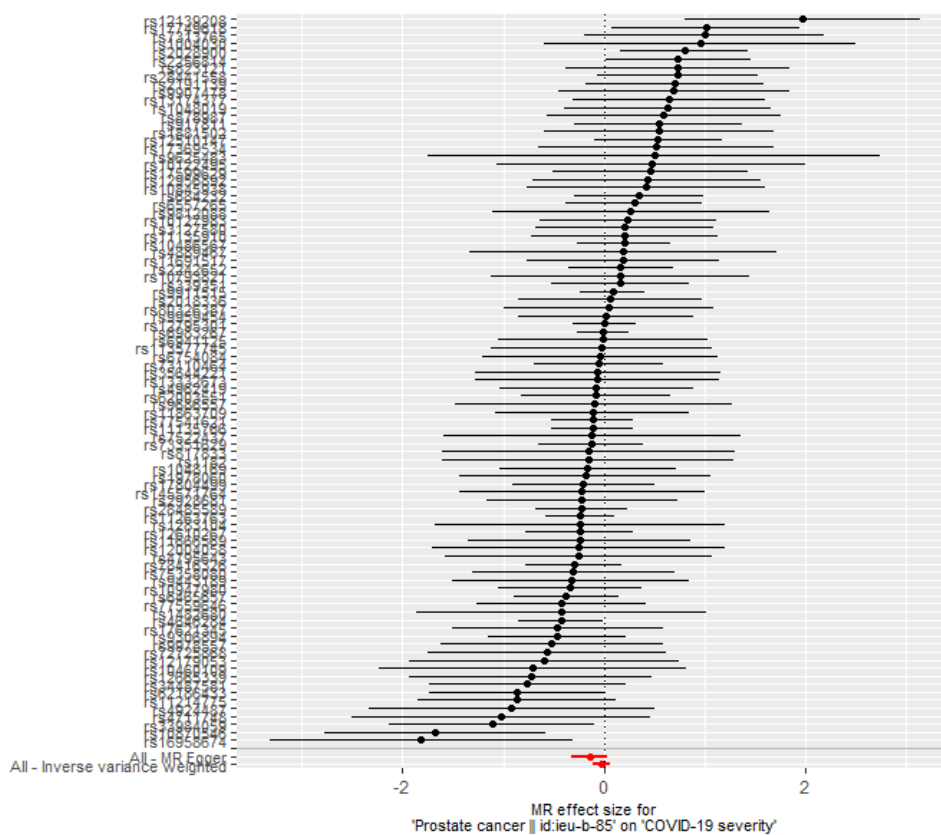

**Figure S1H.** The effect of each SNP in prostate cancer on COVID-19 severity.



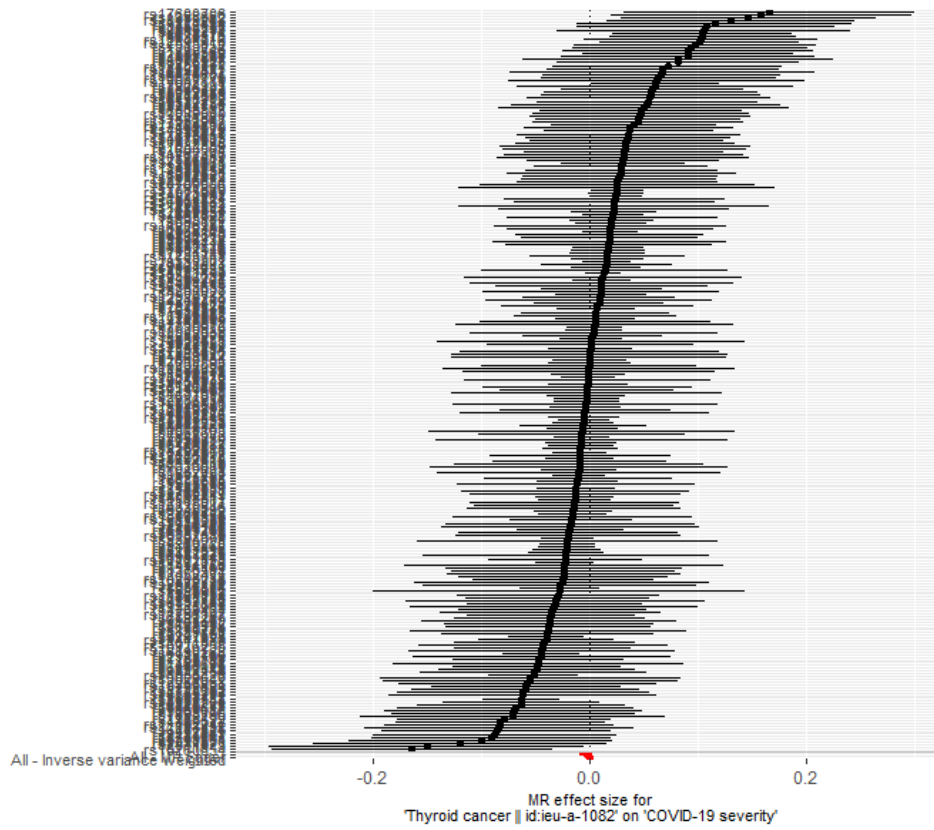

**Figure S1I.** The effect of each SNP in thyroid cancer on COVID-19 severity.

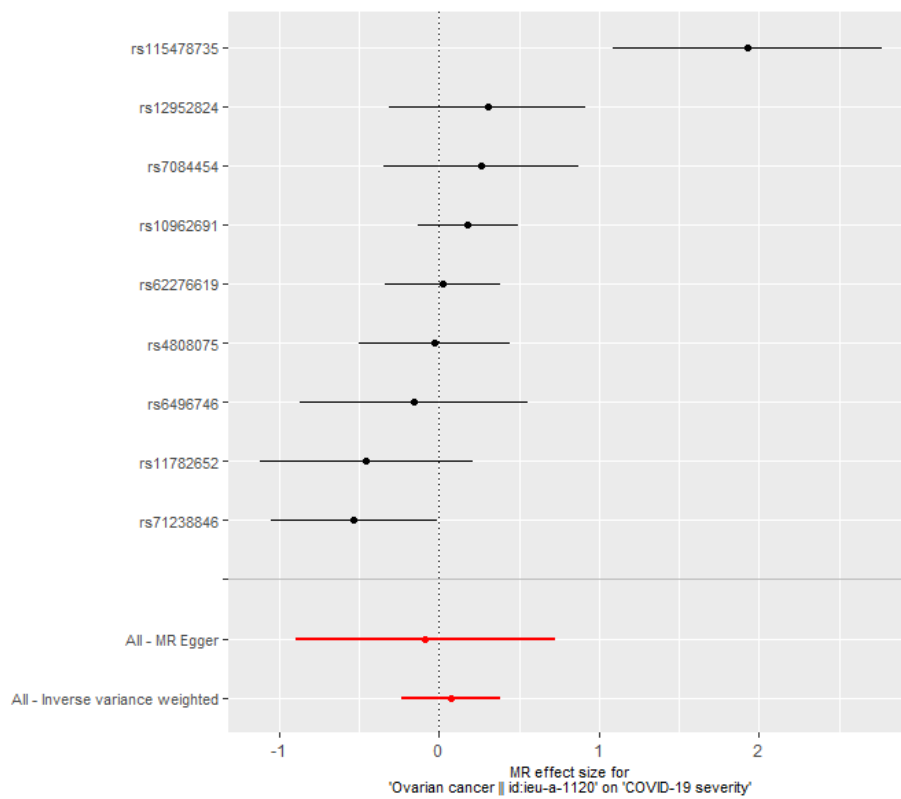

**Figure S1J.** The effect of each SNP in ovarian cancer on COVID-19 severity.

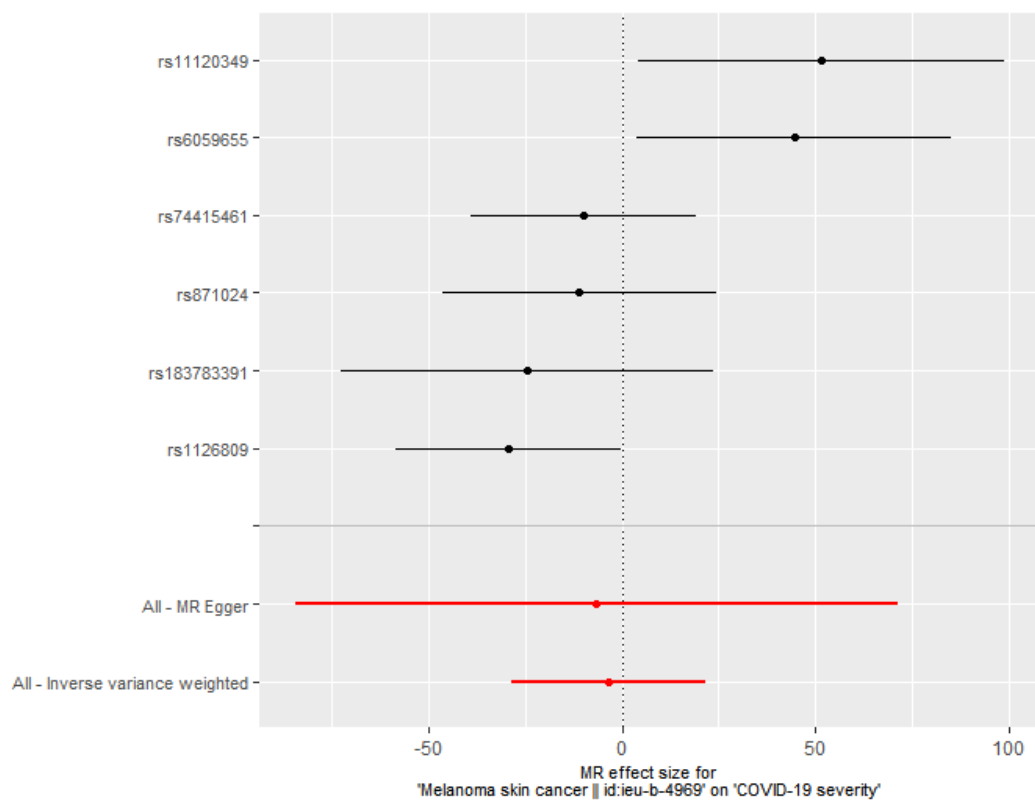

**Figure S1K.** The effect of each SNP in melanoma on COVID-19 severity.

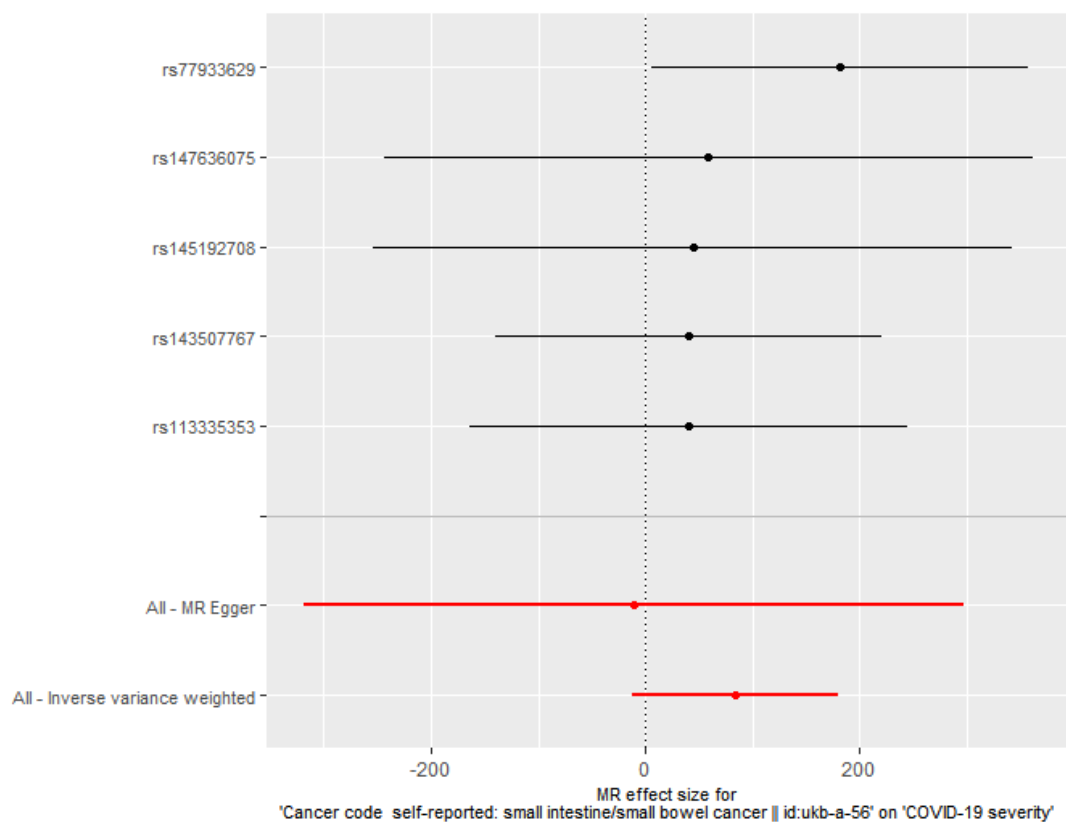

**Figure S1L.** The effect of each SNP in small bowel cancer on COVID-19 severity.

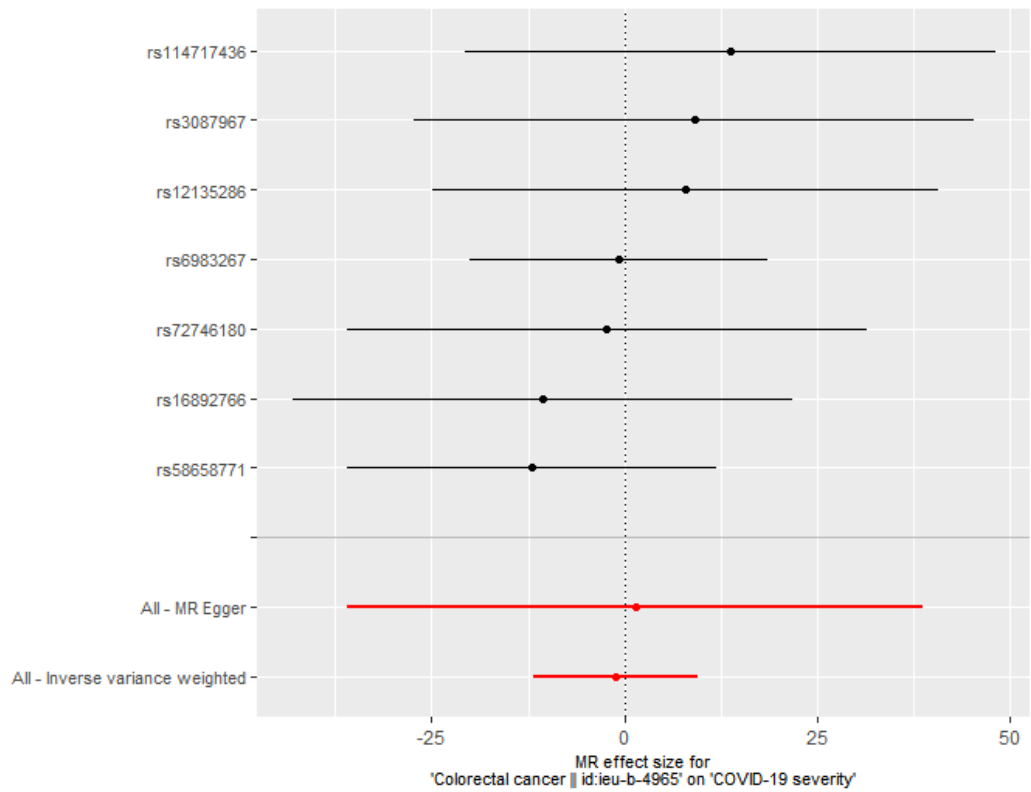

**Figure S1M.** The effect of each SNP in colorectal cancer on COVID-19 severity.

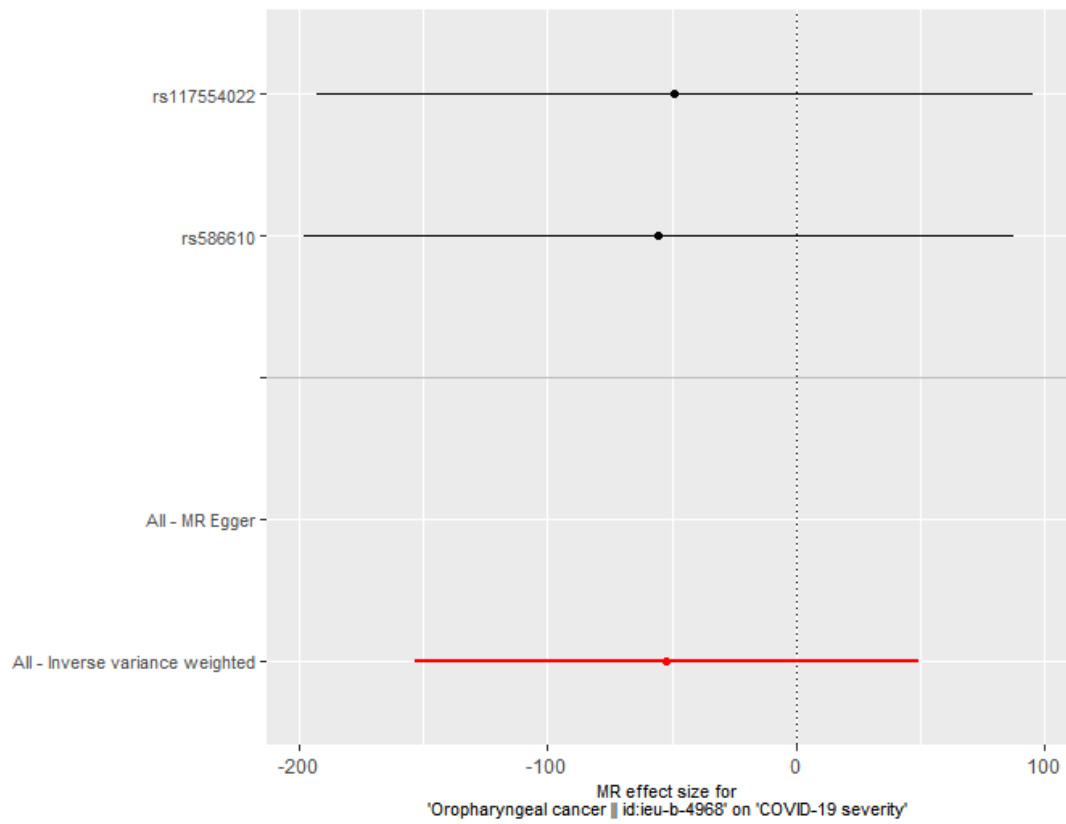

**Figure S1N.** The effect of each SNP in oropharyngeal cancer on COVID-19 severity.

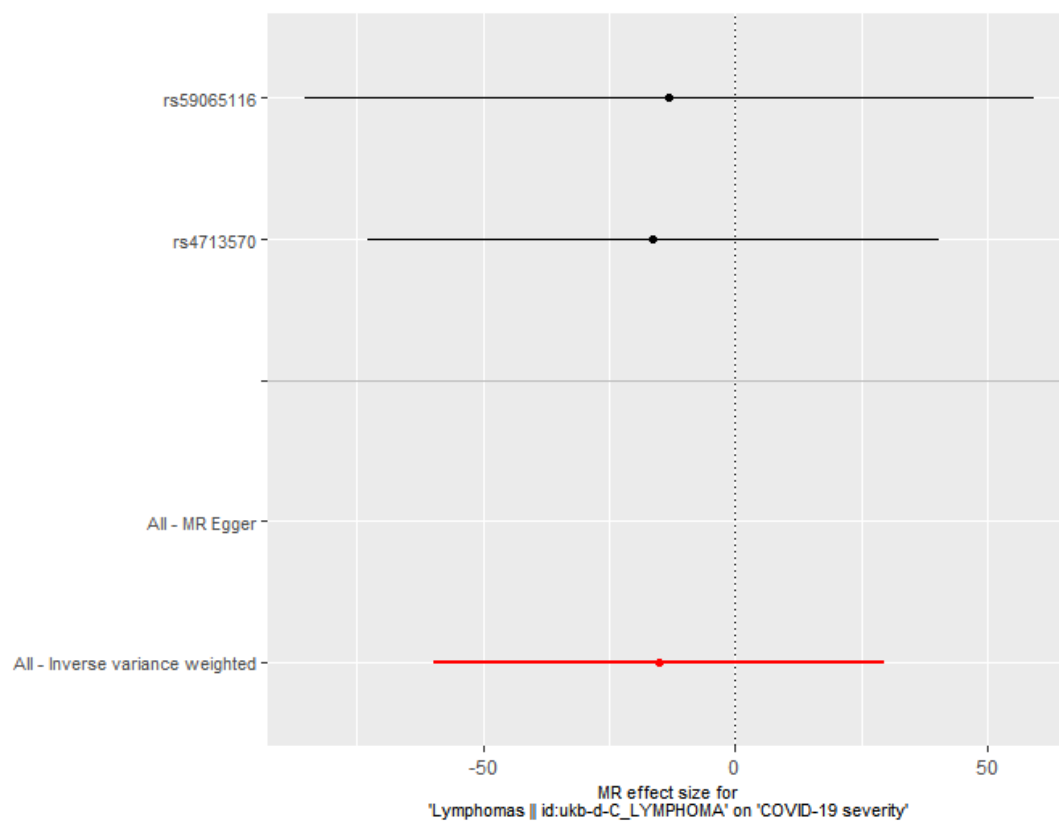

**Figure S1O.** The effect of each SNP in lymphoma on COVID-19 severity.

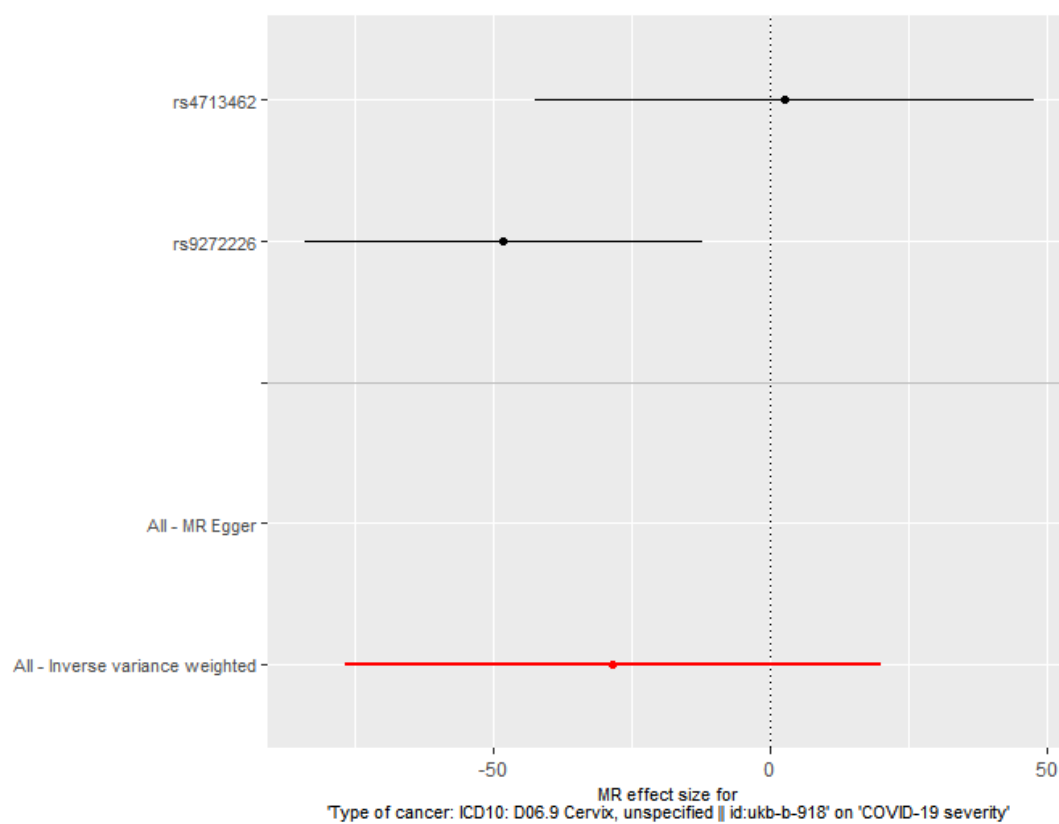

**Figure S1P.** The effect of each SNP in cervix cancer on COVID-19 severity.

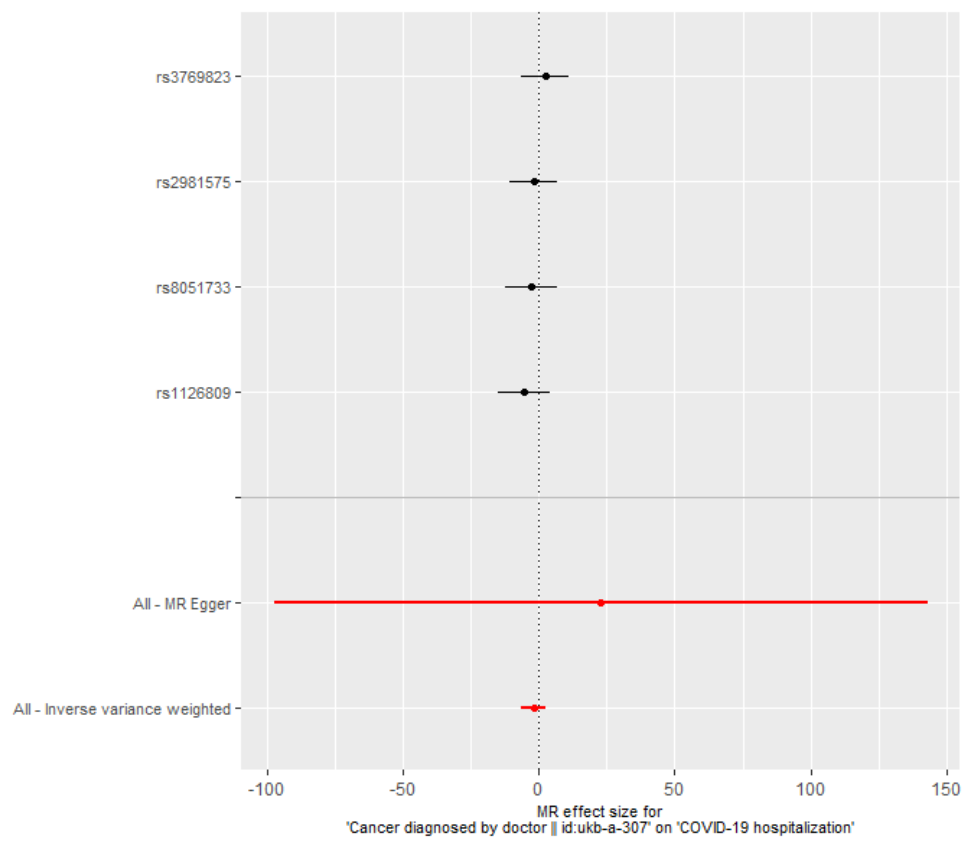

**Figure S2A.** The effect of each SNP in overall cancer on COVID-19 hospitalization.

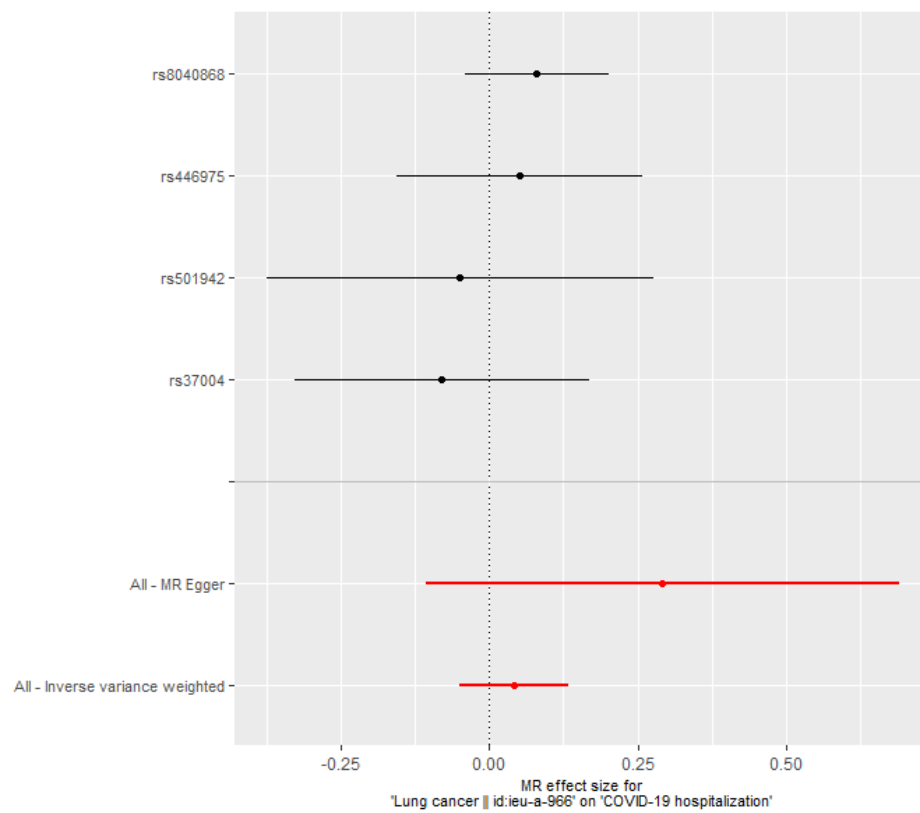

**Figure S2B.** The effect of each SNP in lung cancer on COVID-19 hospitalization.

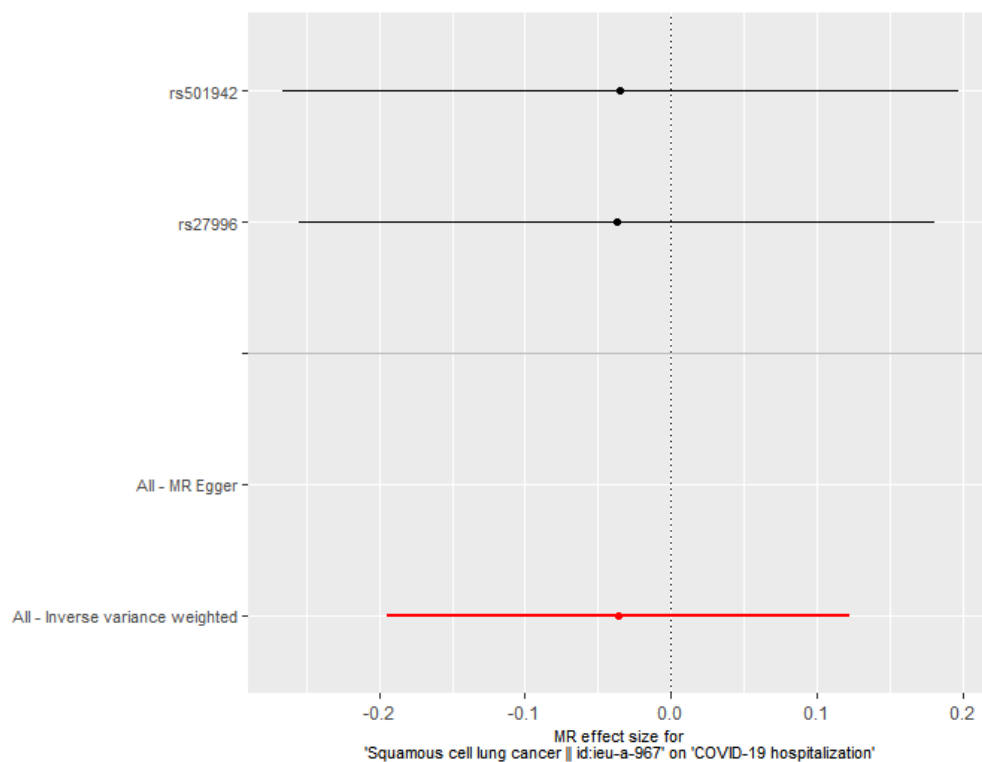

**Figure S2C.** The effect of each SNP in squamous cell lung cancer on COVID-19 hospitalization.

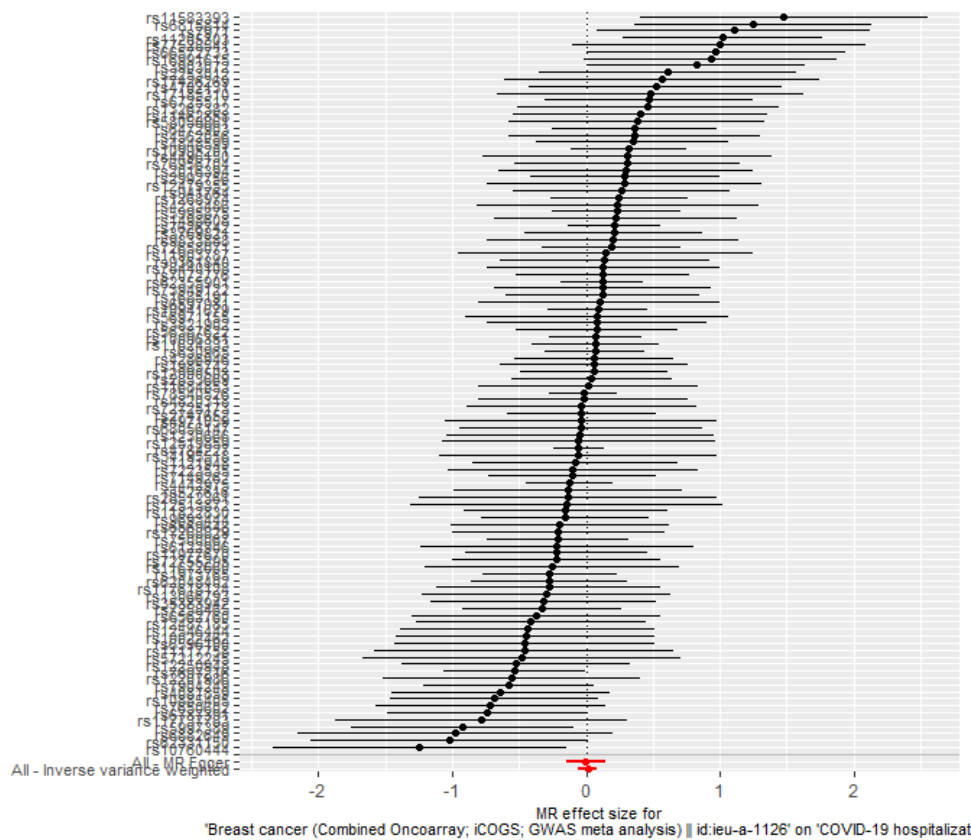

**Figure S2D.** The effect of each SNP in breast cancer on COVID-19 hospitalization.

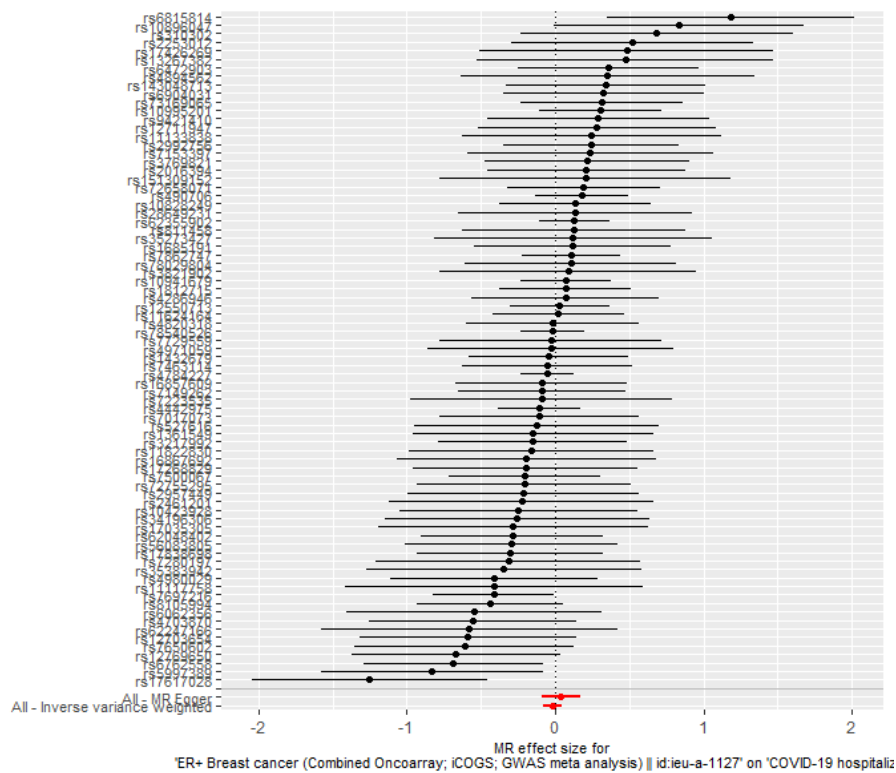

**Figure S2E.** The effect of each SNP in ER+ breast cancer on COVID-19 hospitalization.

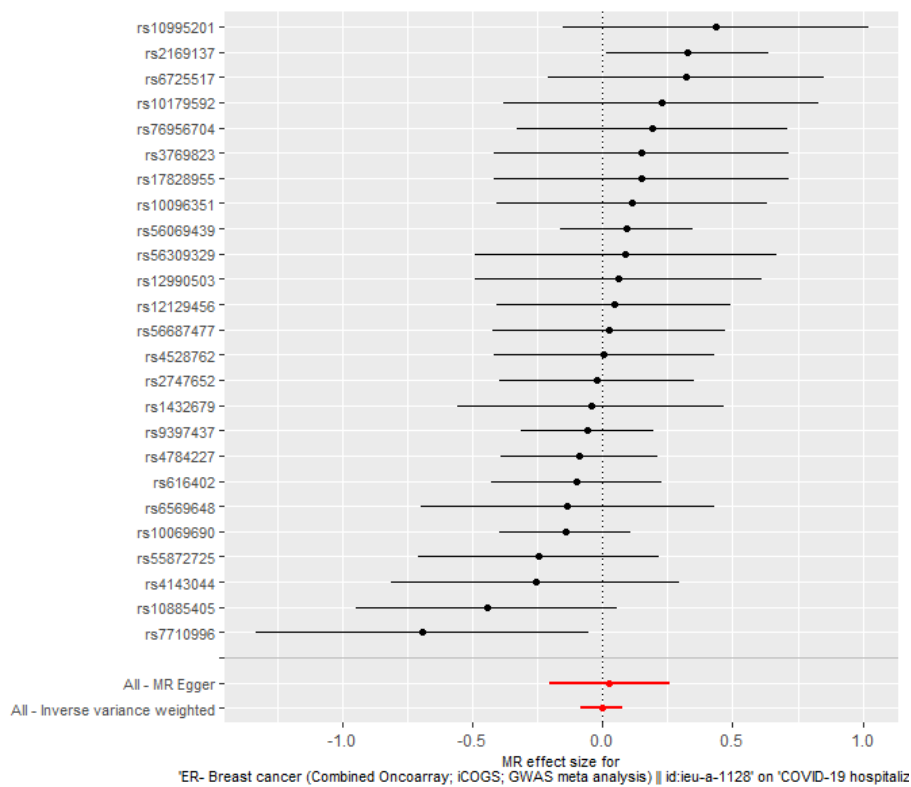

**Figure S2F.** The effect of each SNP in ER- breast cancer on COVID-19 hospitalization.

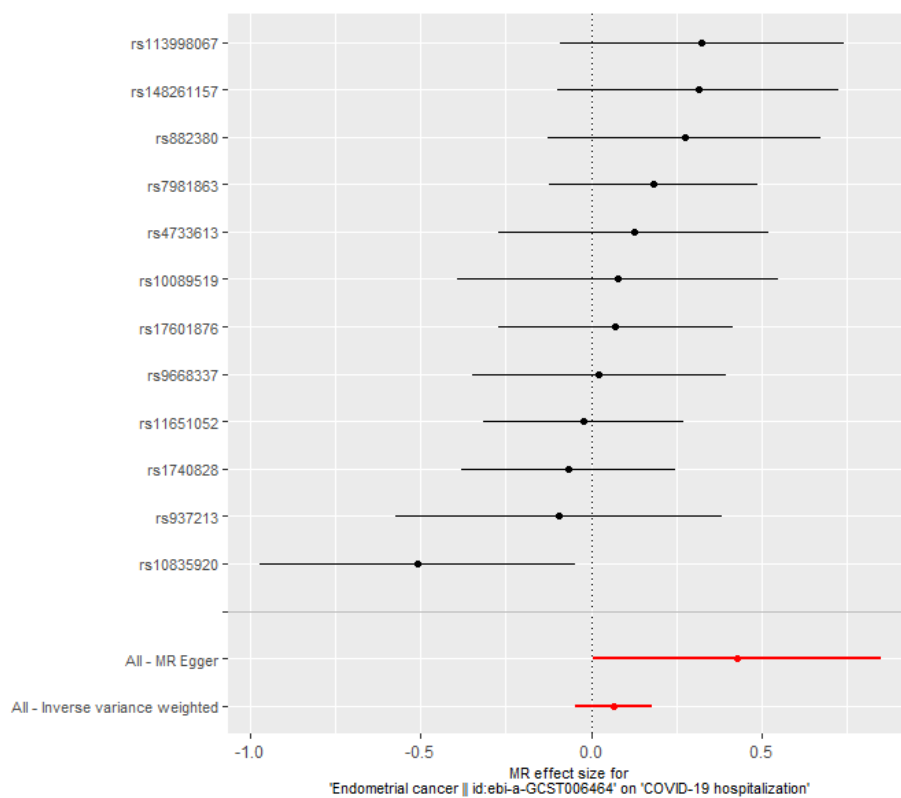

**Figure S2G.** The effect of each SNP in endometrial cancer on COVID-19 hospitalization.

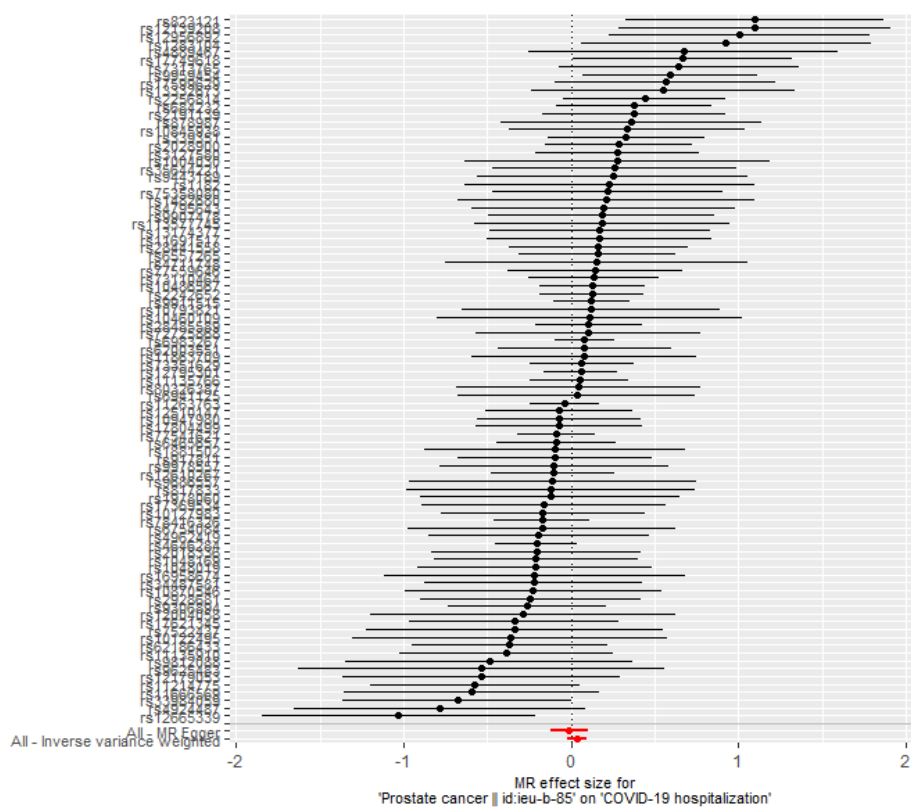

**Figure S2H.** The effect of each SNP in prostate cancer on COVID-19 hospitalization.



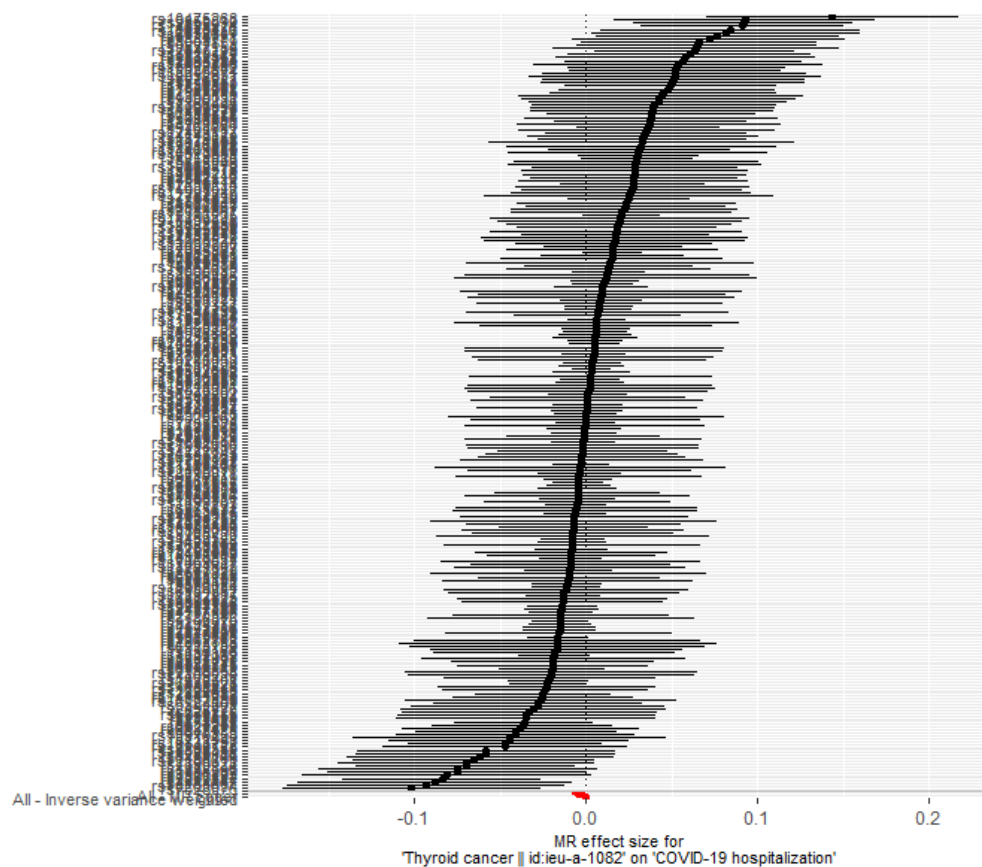

**Figure S2I.** The effect of each SNP in thyroid cancer on COVID-19 hospitalization.

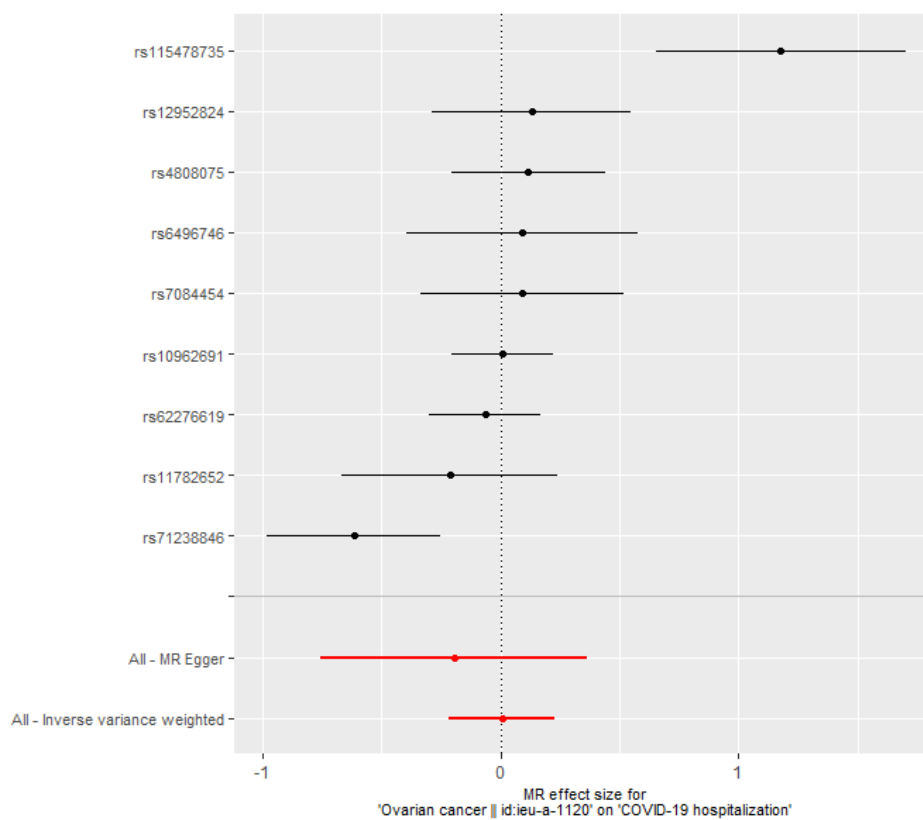

**Figure S2J.** The effect of each SNP in ovarian cancer on COVID-19 hospitalization.

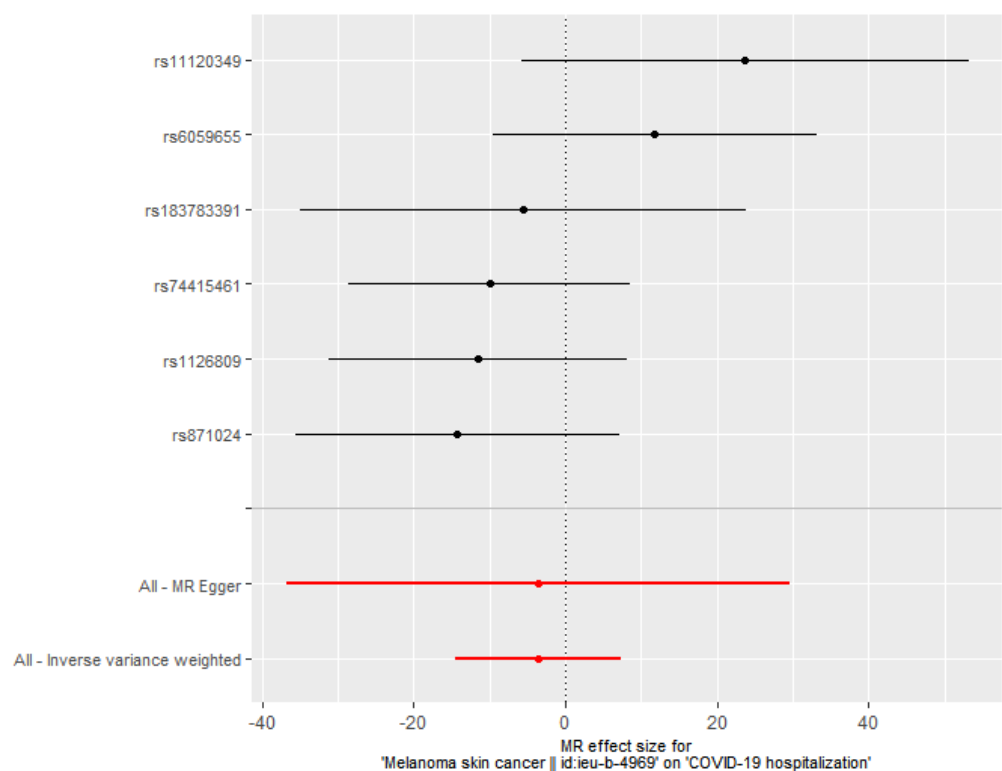

**Figure S2K.** The effect of each SNP in melanoma on COVID-19 hospitalization.

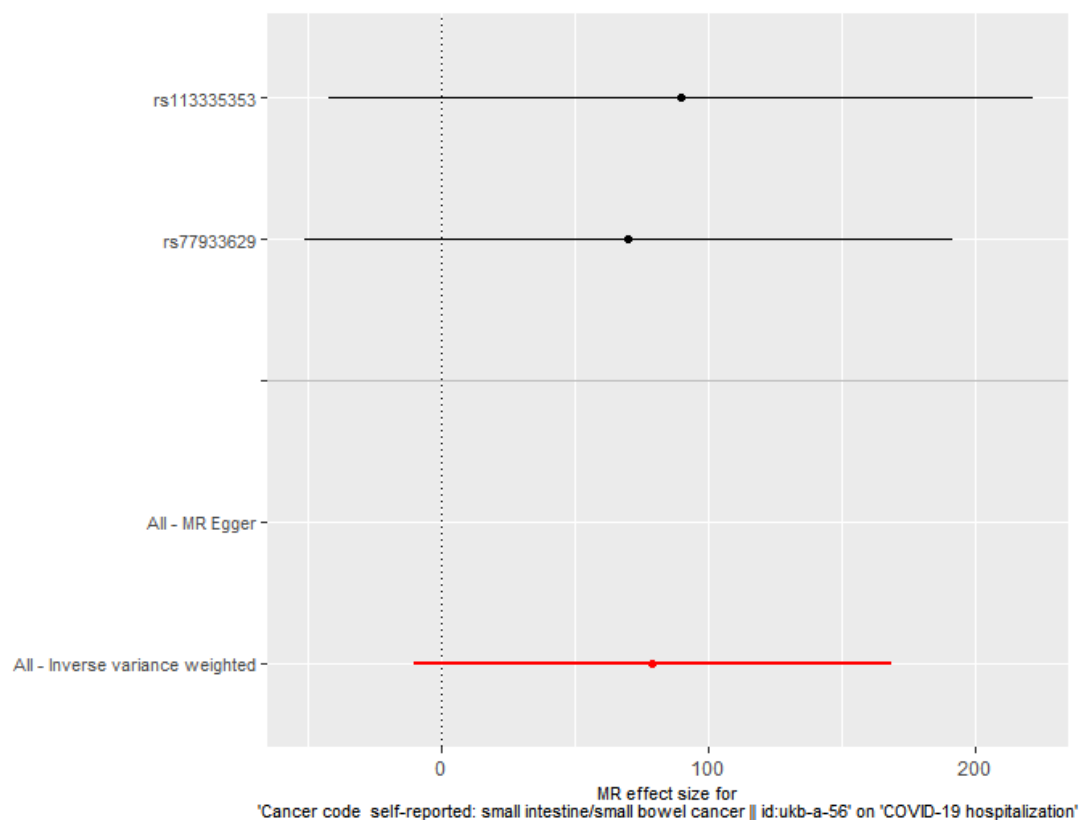

**Figure S2L.** The effect of each SNP in small bowel cancer on COVID-19 hospitalization.

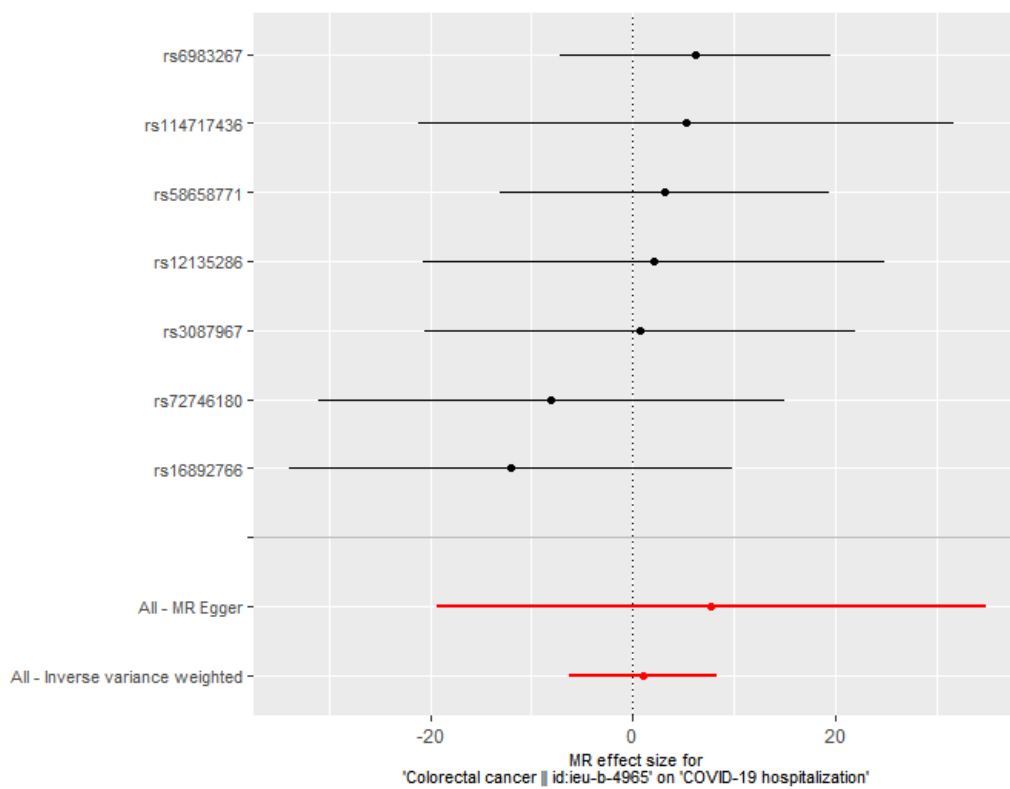

**Figure S2M.** The effect of each SNP in colorectal cancer on COVID-19 hospitalization.

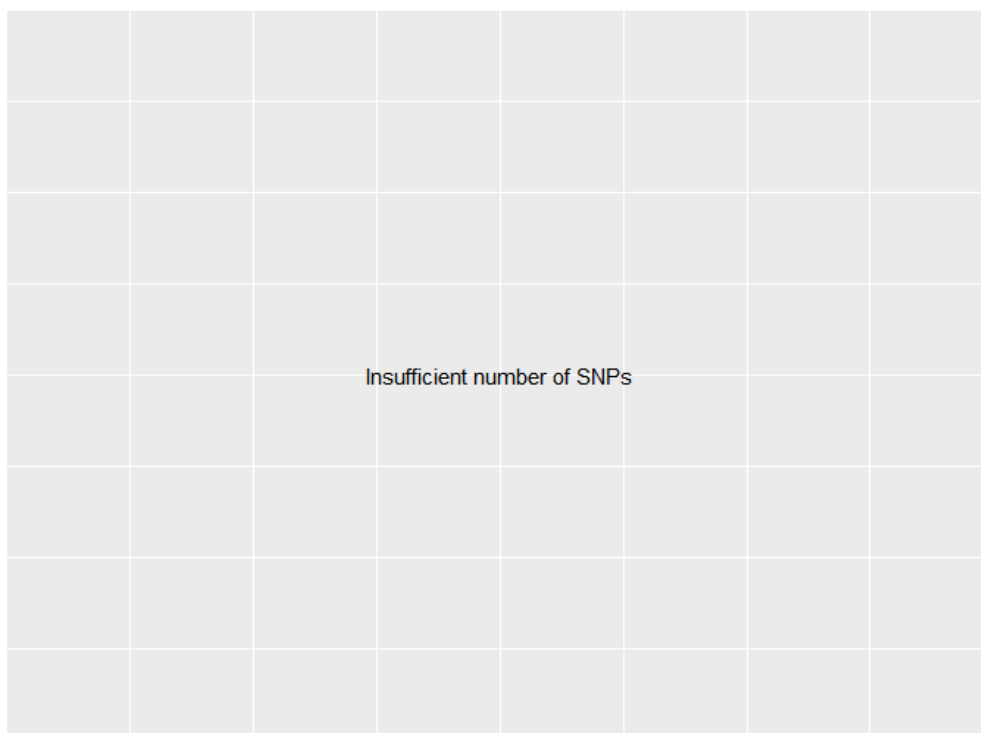

**Figure S2N.** The effect of each SNP in oropharyngeal cancer on COVID-19 hospitalization.

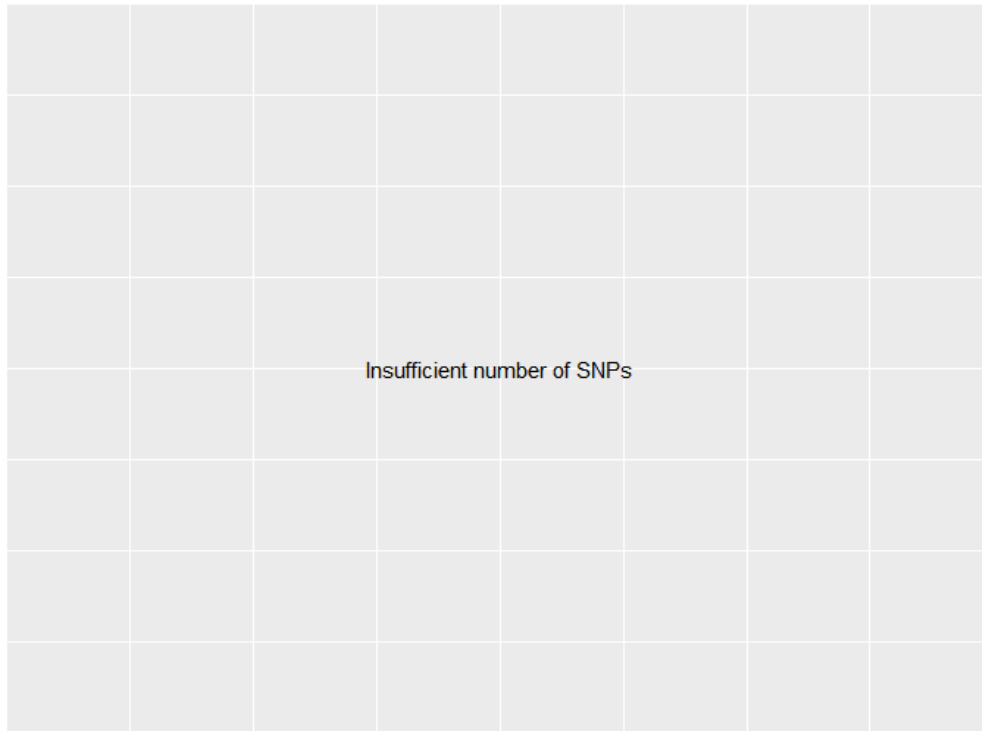

**Figure S2O.** The effect of each SNP in lymphoma on COVID-19 hospitalization.

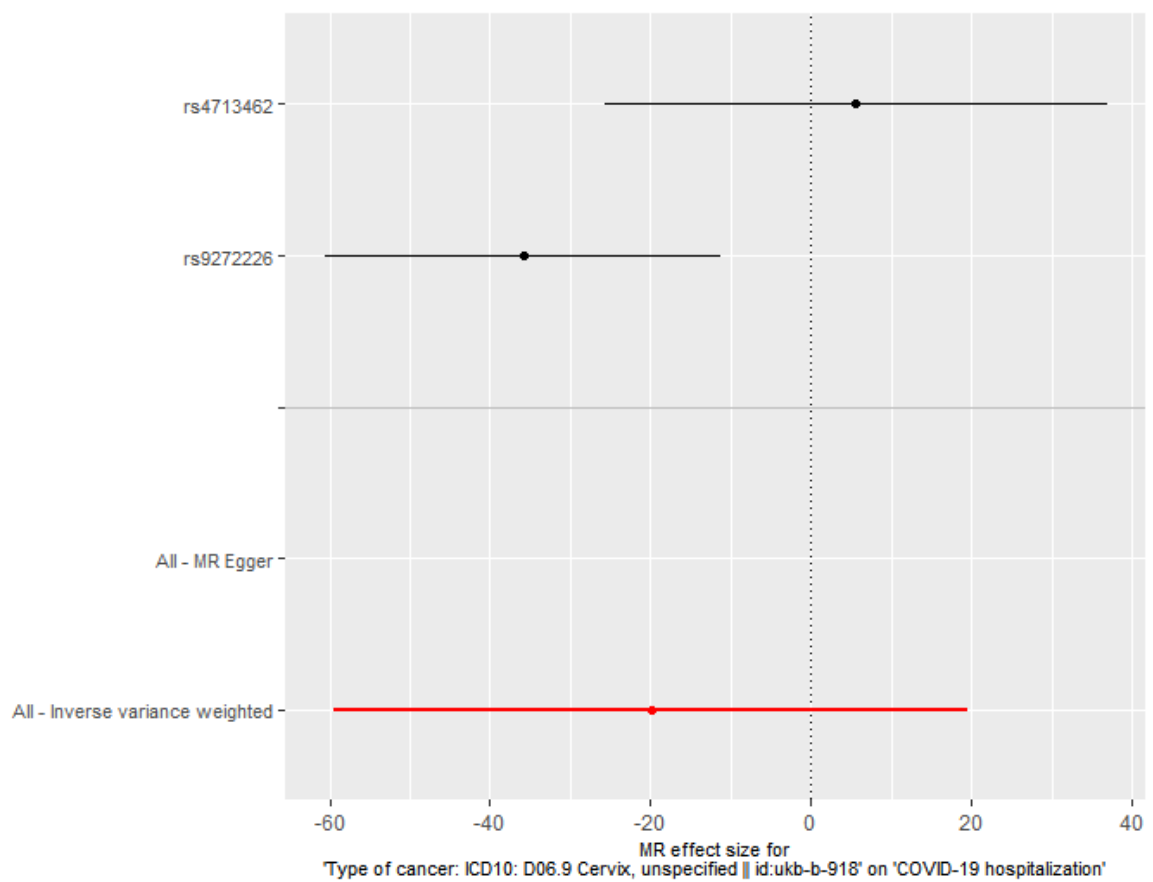

**Figure S2P.** The effect of each SNP in cervix cancer on COVID-19 hospitalization.

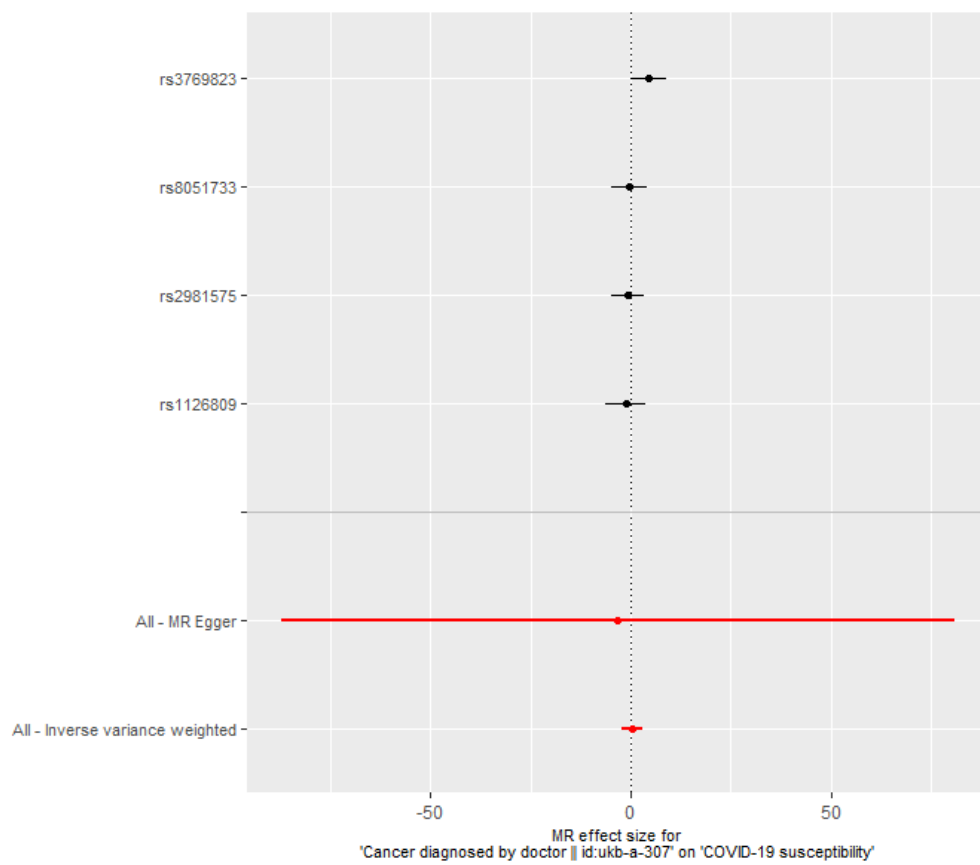

**Figure S3A.** The effect of each SNP in overall cancer on COVID-19 susceptibility.

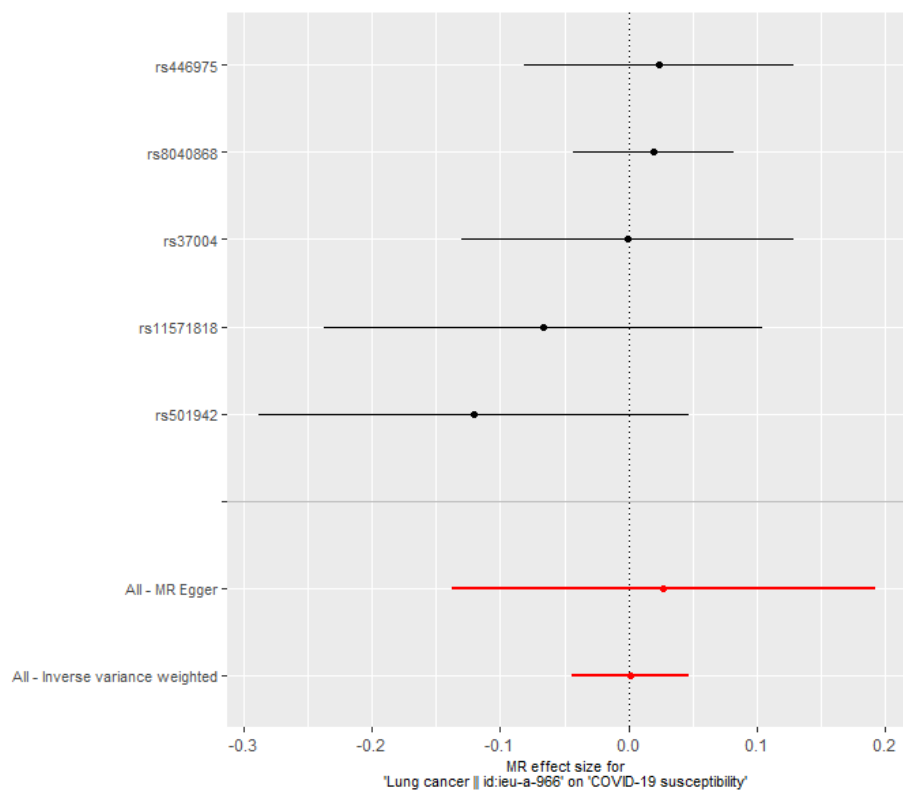

**Figure S3B.** The effect of each SNP in lung cancer on COVID-19 susceptibility.

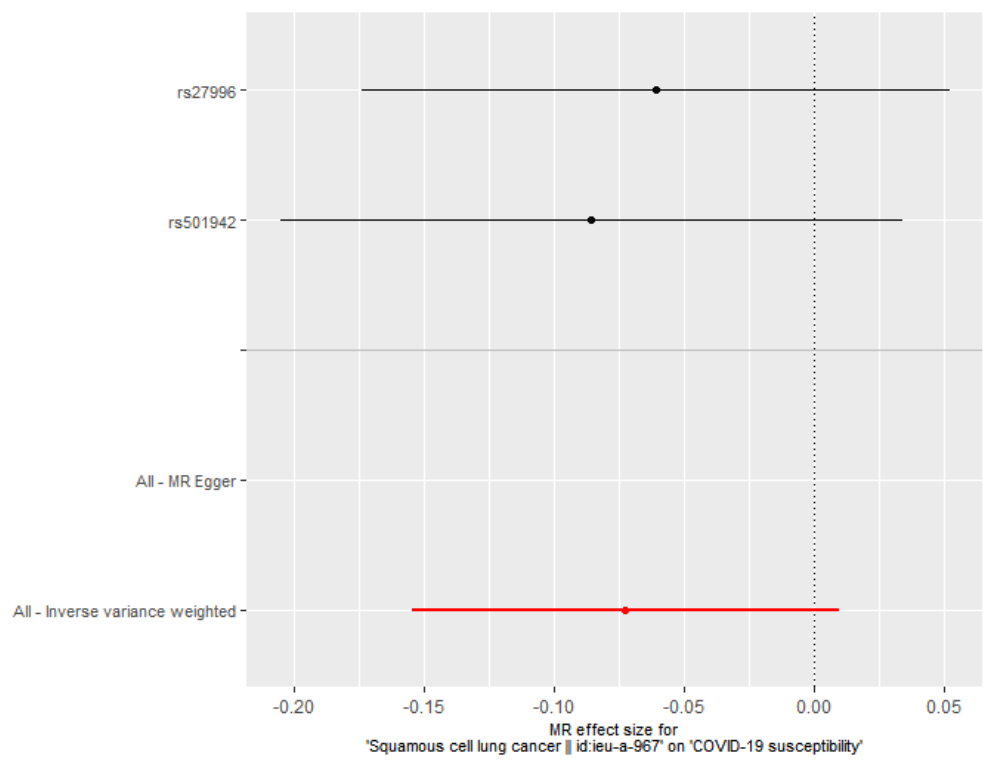

**Figure S3C.** The effect of each SNP in squamous cell lung cancer on COVID-19 susceptibility.

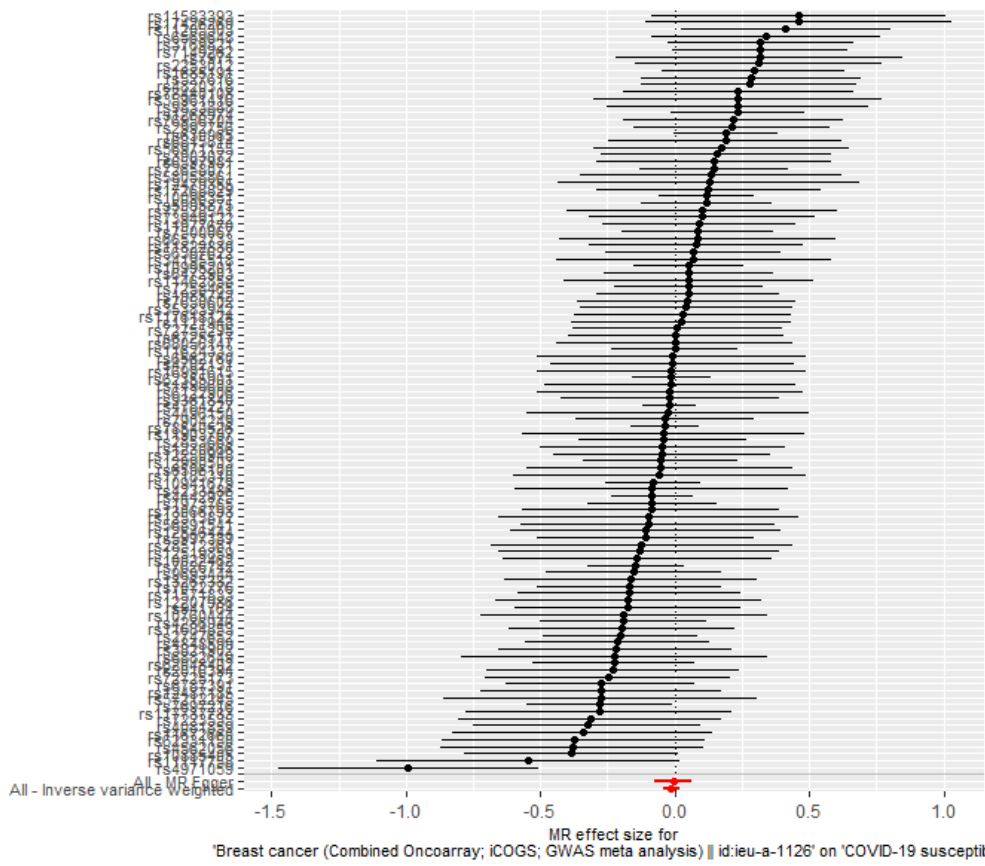

**Figure S3D.** The effect of each SNP in breast cancer on COVID-19 susceptibility.

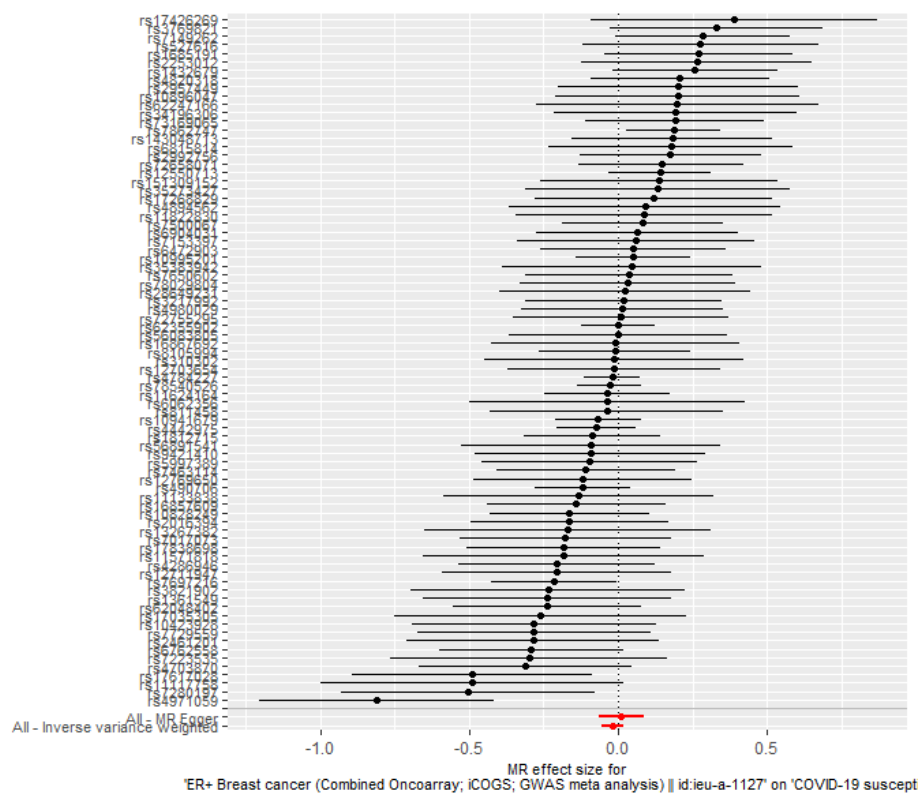

**Figure S3E.** The effect of each SNP in ER+ breast cancer on COVID-19 susceptibility.

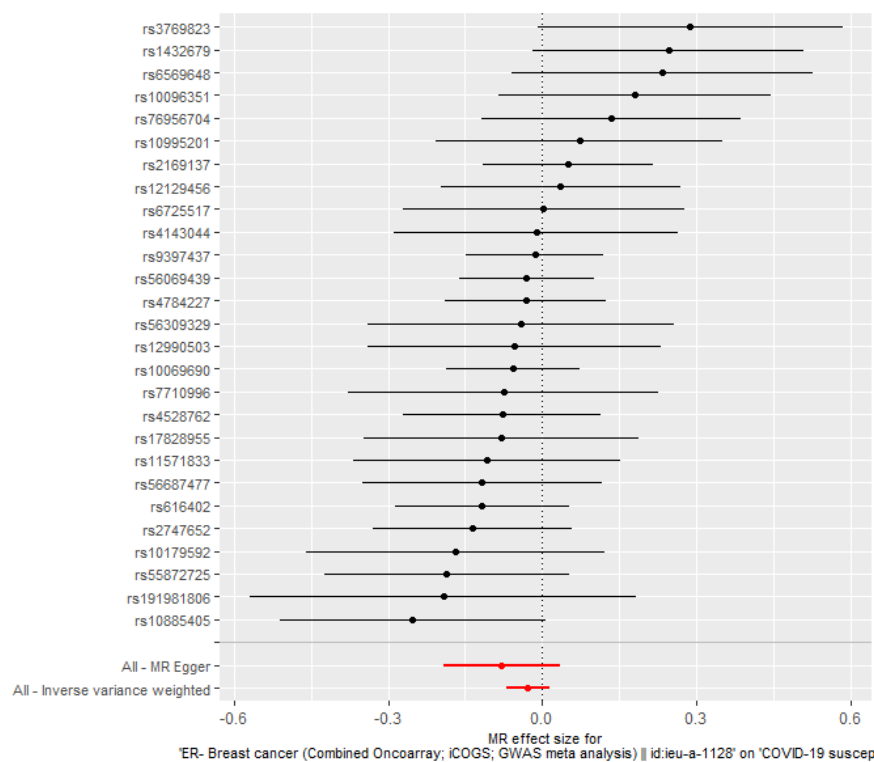

**Figure S3F.** The effect of each SNP in ER- breast cancer on COVID-19 susceptibility.





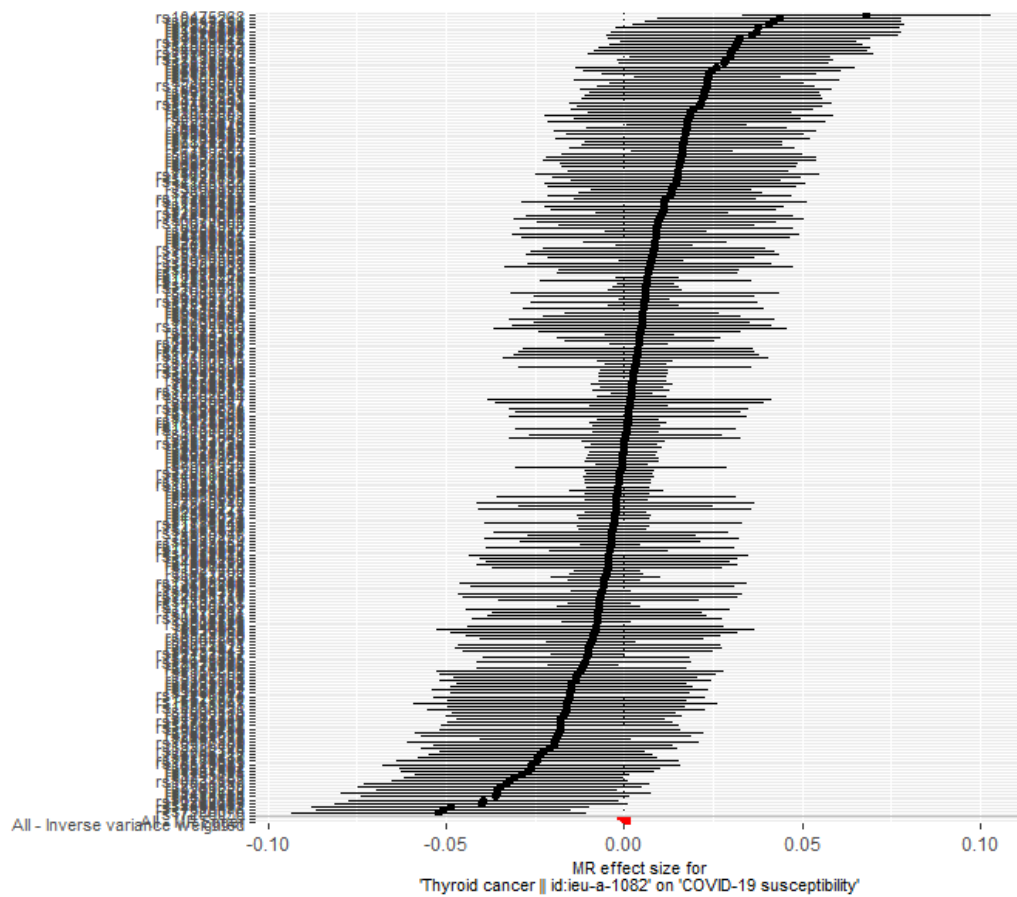

**Figure S3I.** The effect of each SNP in thyroid cancer on COVID-19 susceptibility.

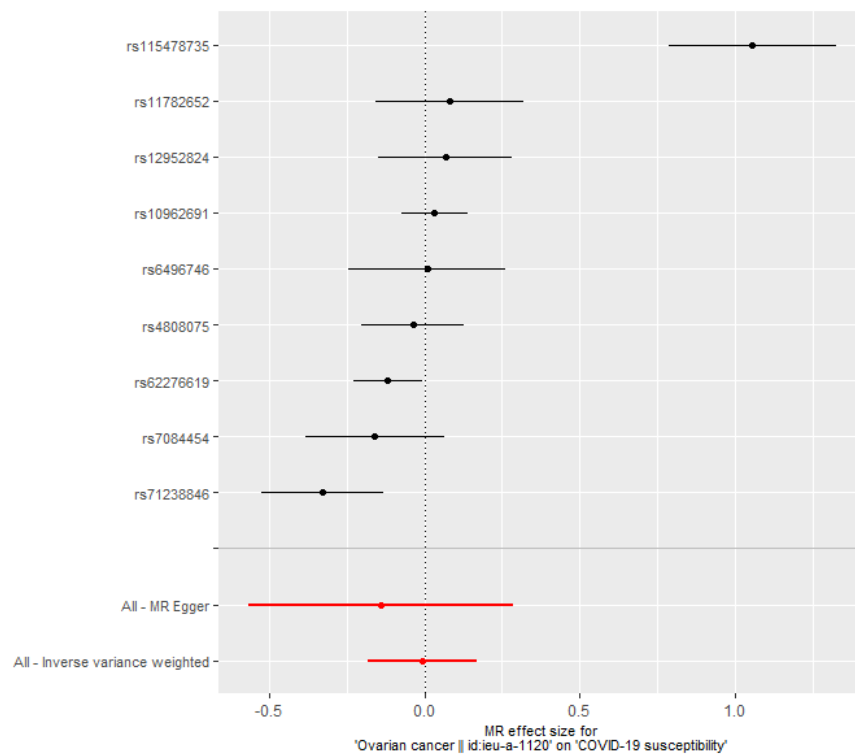

**Figure S3J.** The effect of each SNP in ovarian cancer on COVID-19 susceptibility.

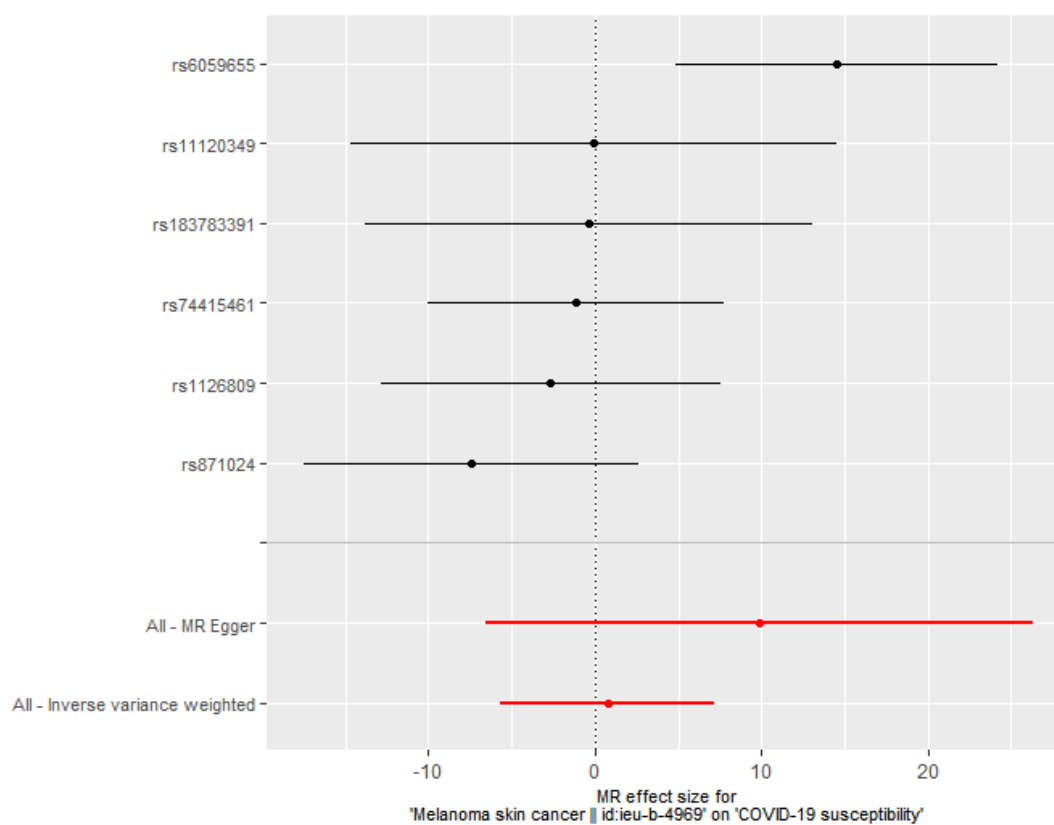

**Figure S3K.** The effect of each SNP in melanoma on COVID-19 susceptibility.

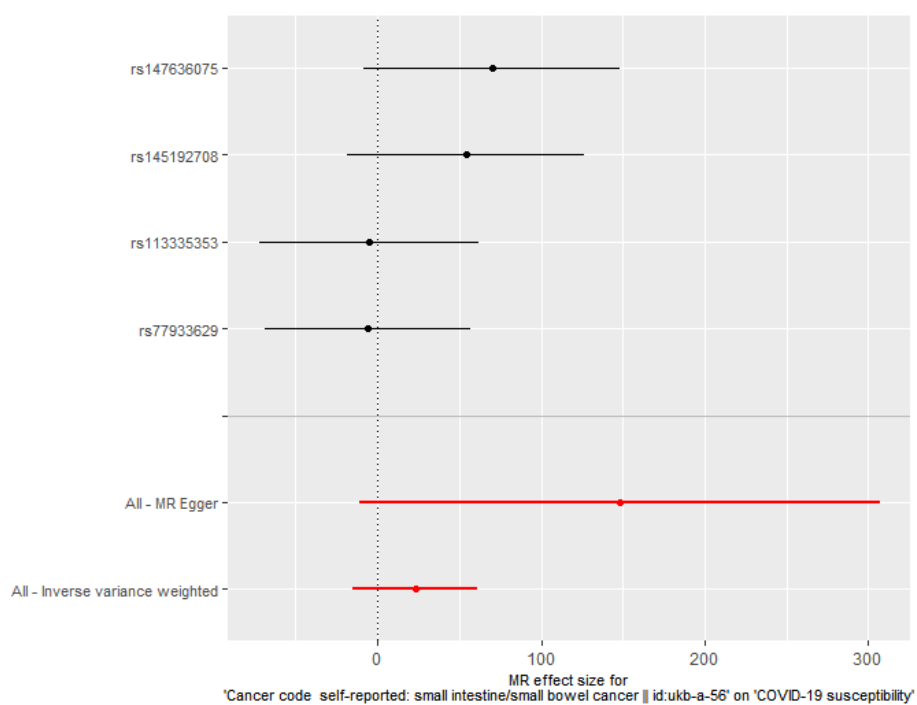

**Figure S3L.** The effect of each SNP in small bowel cancer on COVID-19 susceptibility.

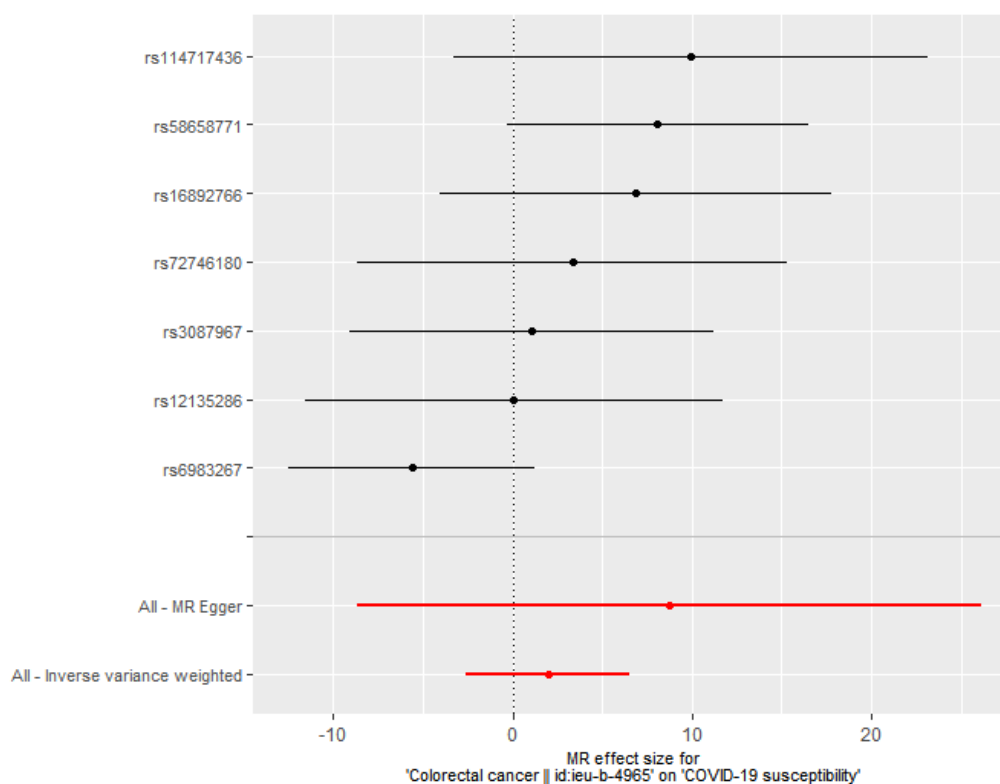

**Figure S3M.** The effect of each SNP in colorectal cancer on COVID-19 susceptibility.

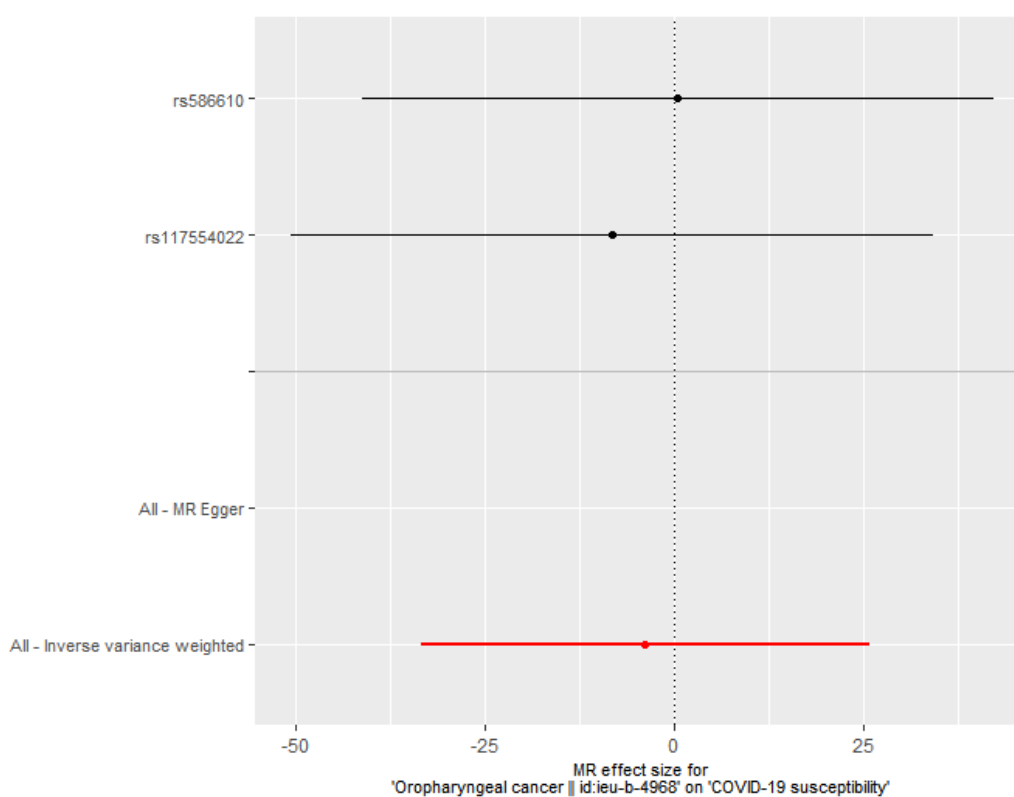

**Figure S3N.** The effect of each SNP in oropharyngeal cancer on COVID-19 susceptibility.

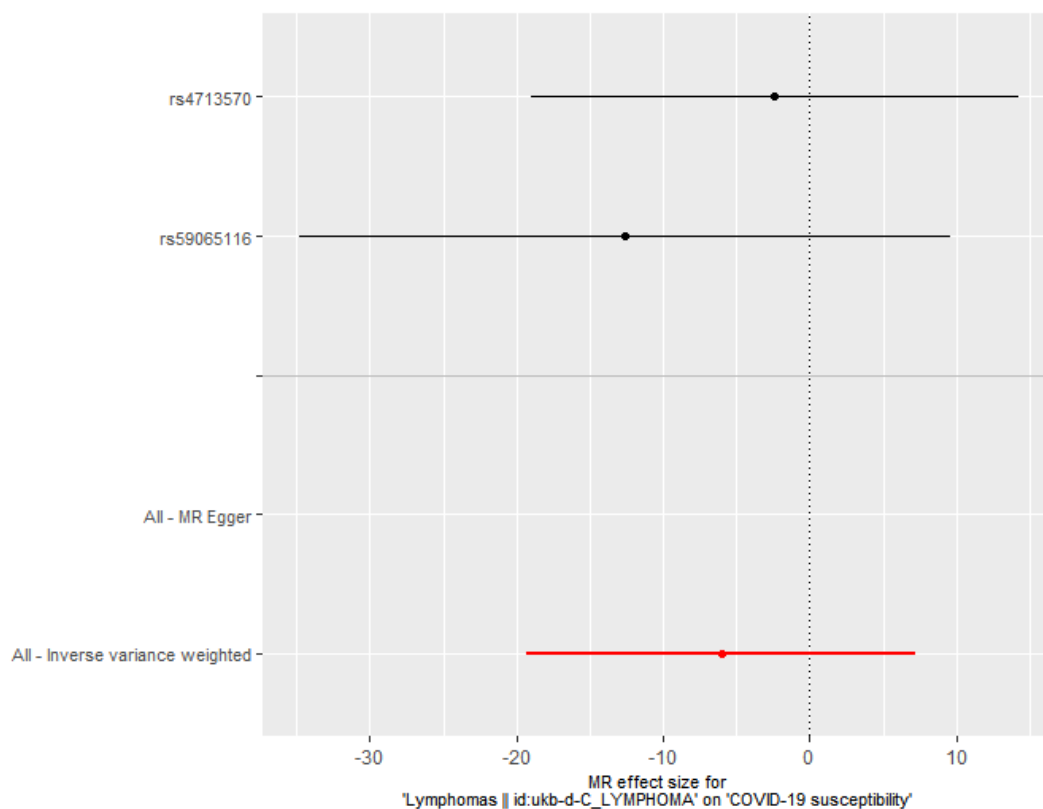

**Figure S3O.** The effect of each SNP in lymphoma on COVID-19 susceptibility.

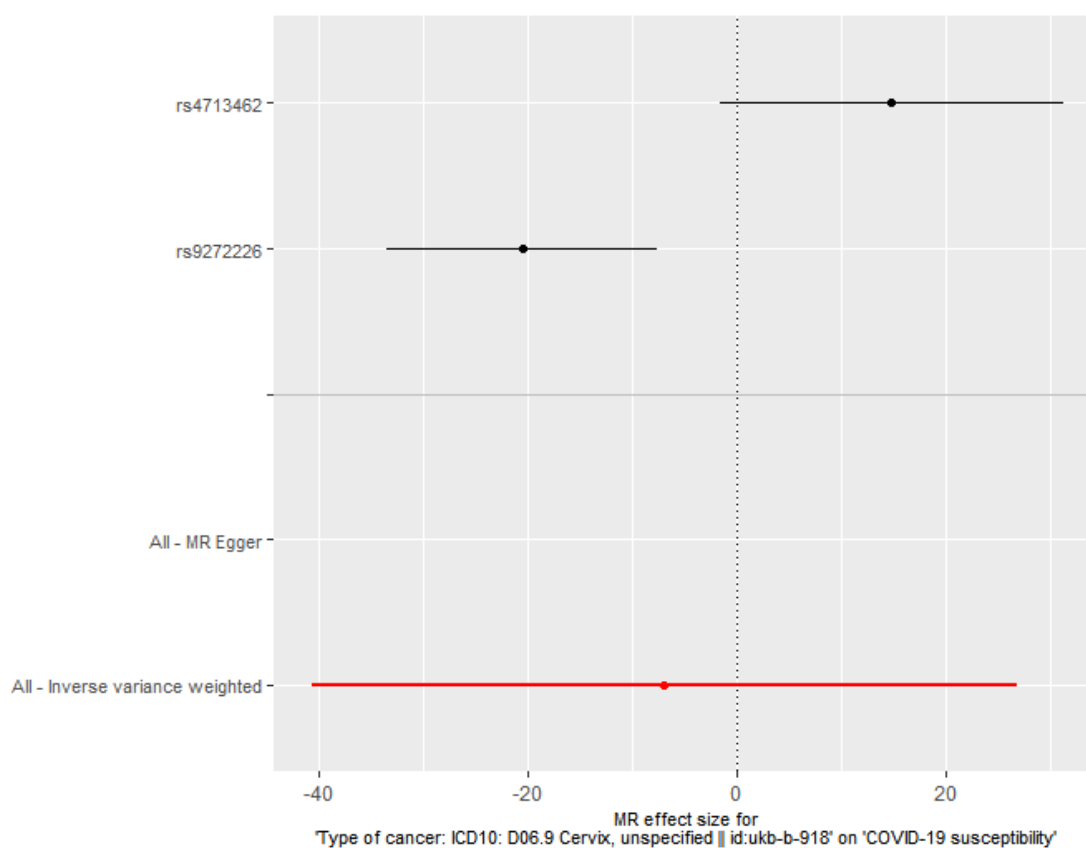

**Figure S3P.** The effect of each SNP in cervix cancer on COVID-19 susceptibility.

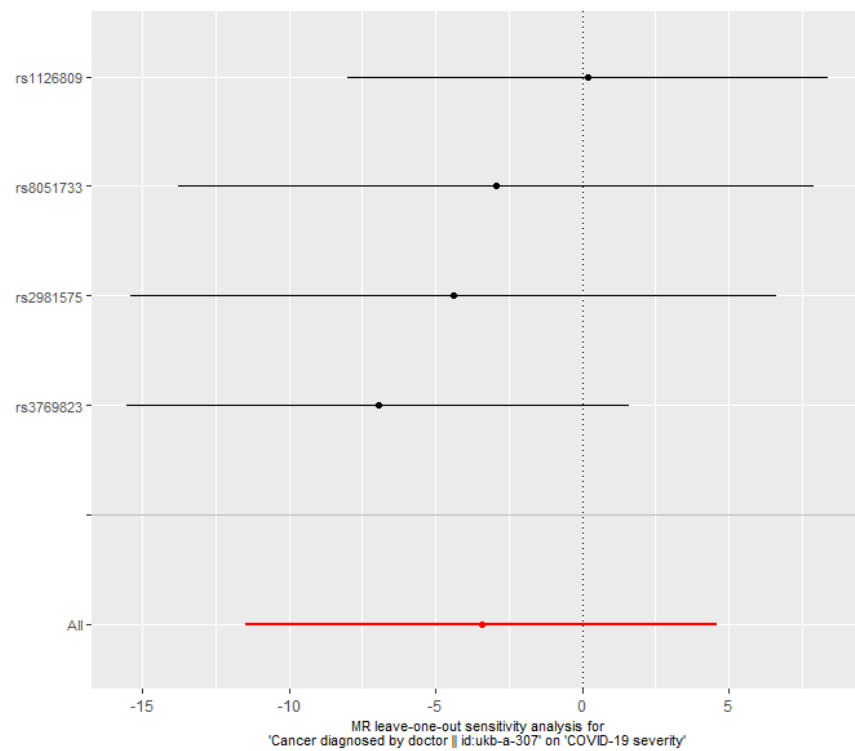

**Figure S4A.** The leave-one-out sensitivity analysis of the causal effect of overall cancer on COVID-19 severity.

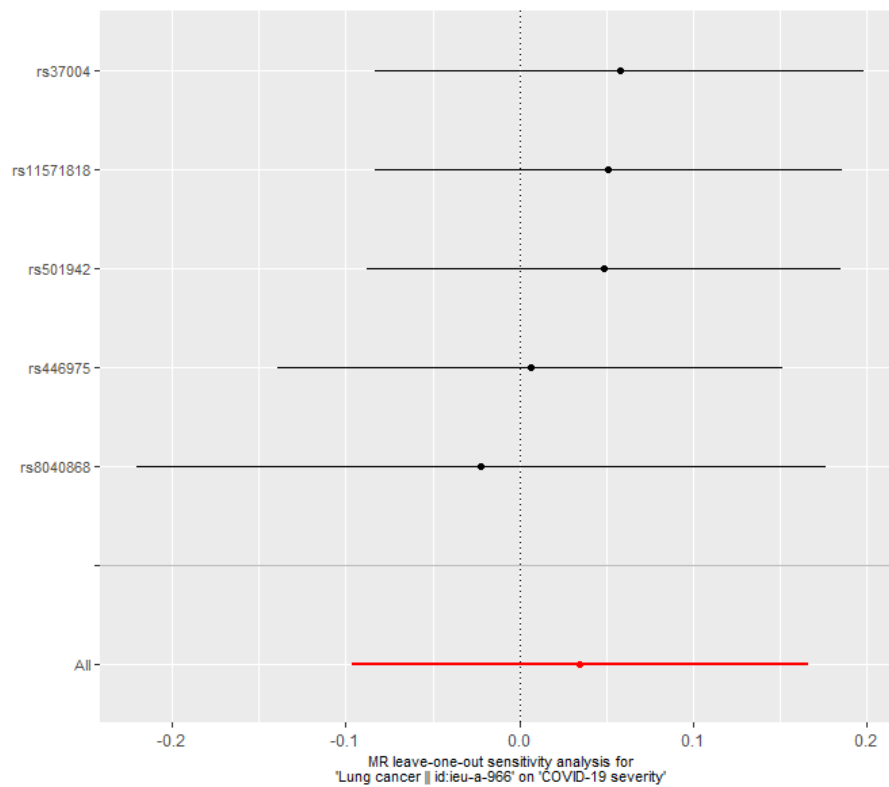

**Figure S4B.** The leave-one-out sensitivity analysis of the causal effect of lung cancer on COVID-19 severity.

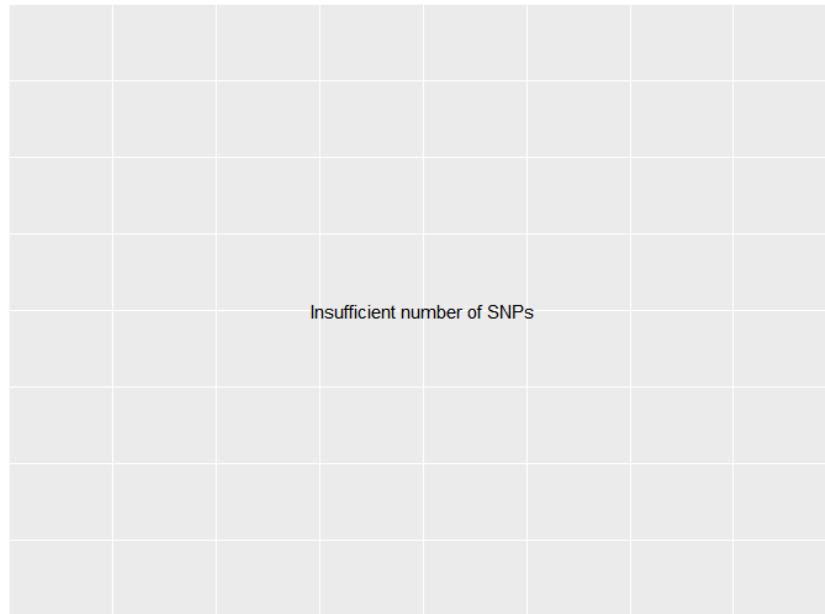

**Figure S4C.** The leave-one-out sensitivity analysis of the causal effect of squamous cell lung cancer on COVID-19 severity.

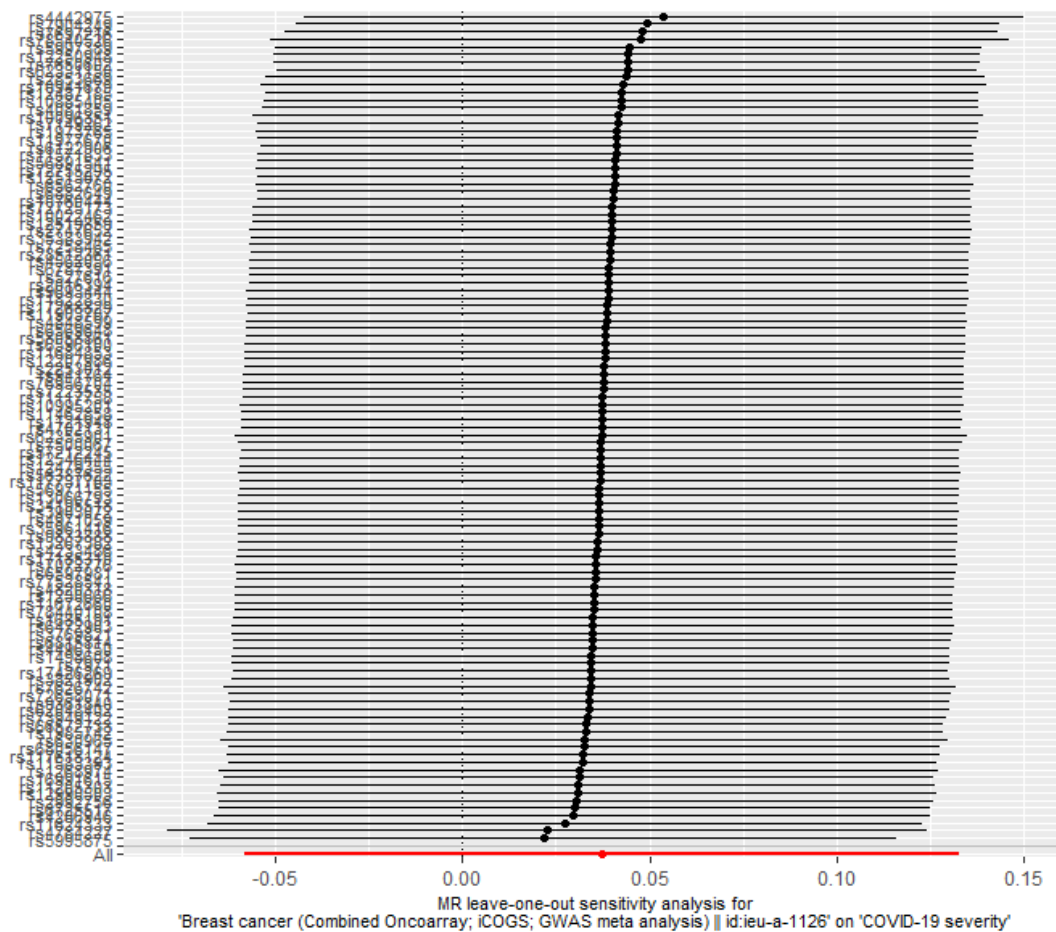

**Figure S4D.** The leave-one-out sensitivity analysis of the causal effect of breast cancer on COVID-19 severity.

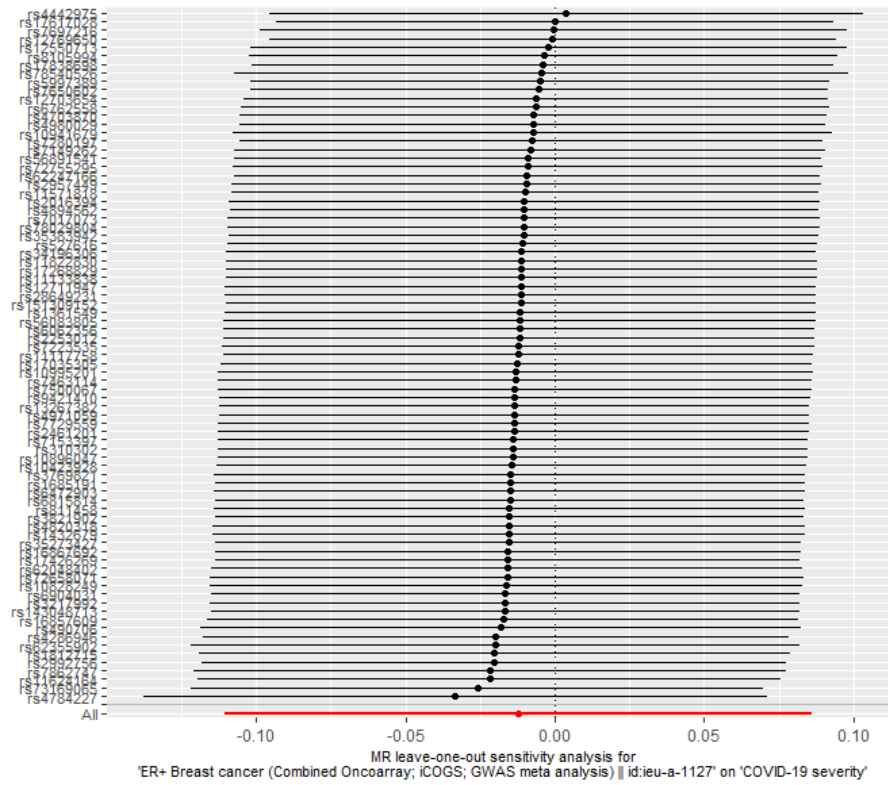

**Figure S4E.** The leave-one-out sensitivity analysis of the causal effect of ER+ breast cancer on COVID-19 severity.

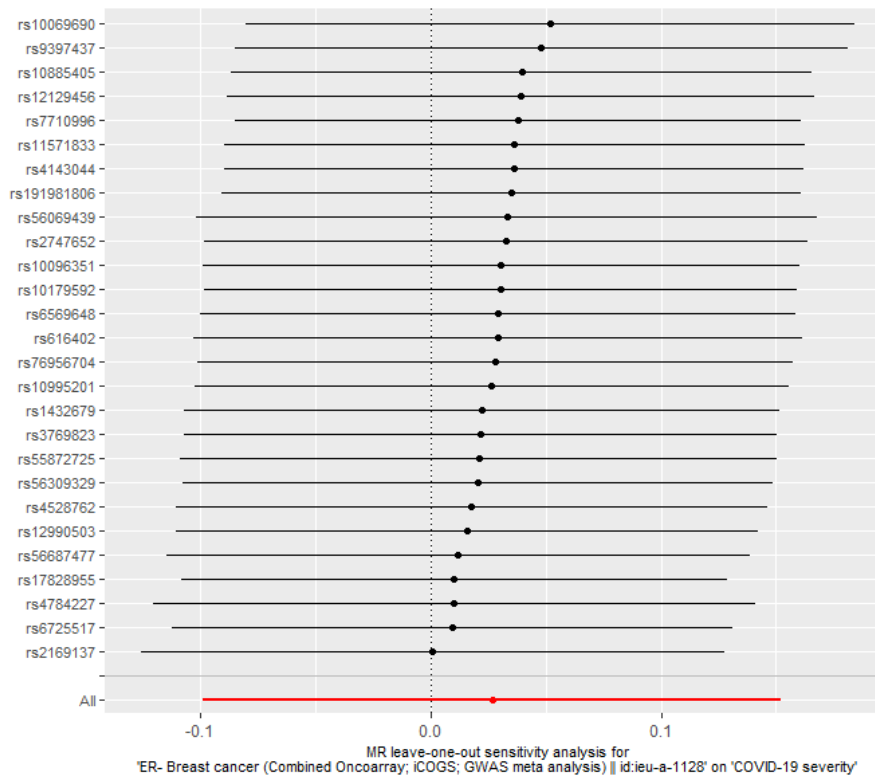

**Figure S4F.** The leave-one-out sensitivity analysis of the causal effect of ER- breast cancer on COVID-19 severity.

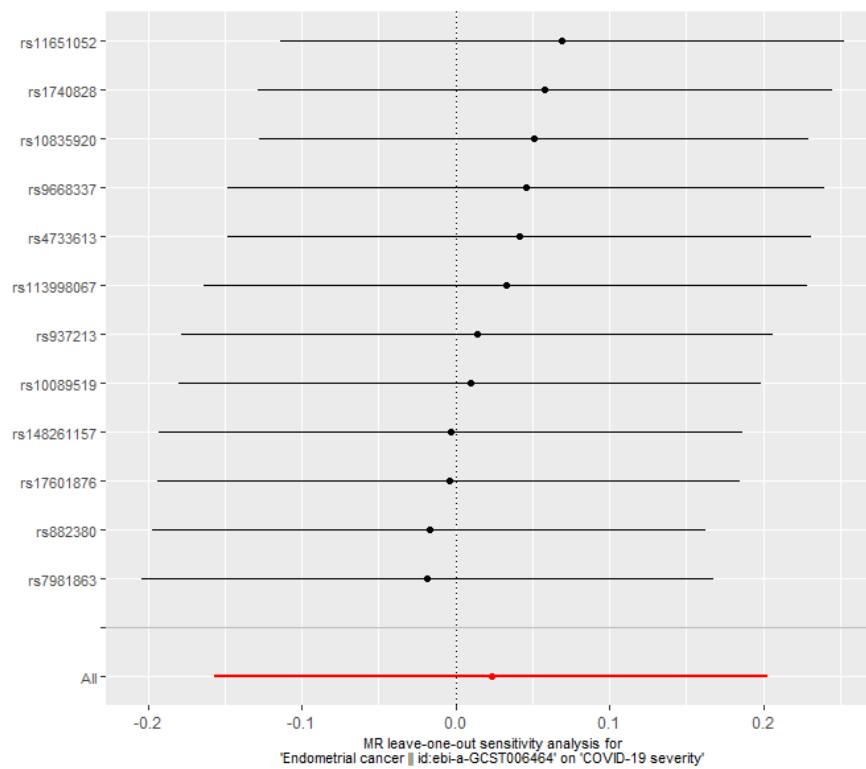

**Figure S4G.** The leave-one-out sensitivity analysis of the causal effect of endometrial cancer on COVID-19 severity.

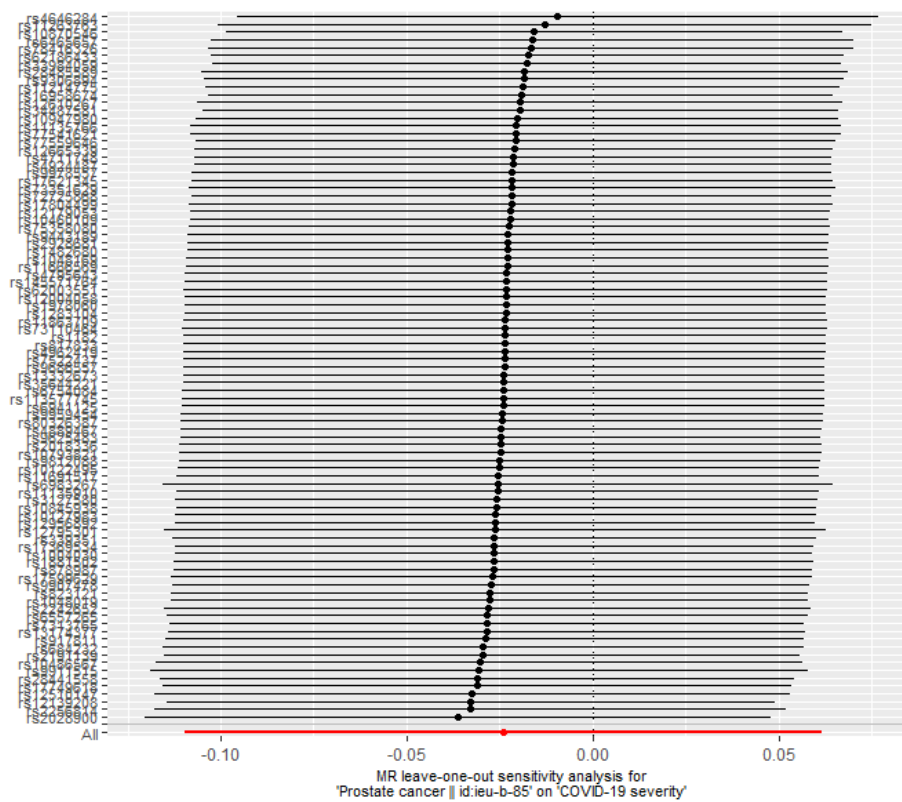

**Figure S4H.** The leave-one-out sensitivity analysis of the causal effect of prostate cancer on COVID-19 severity.



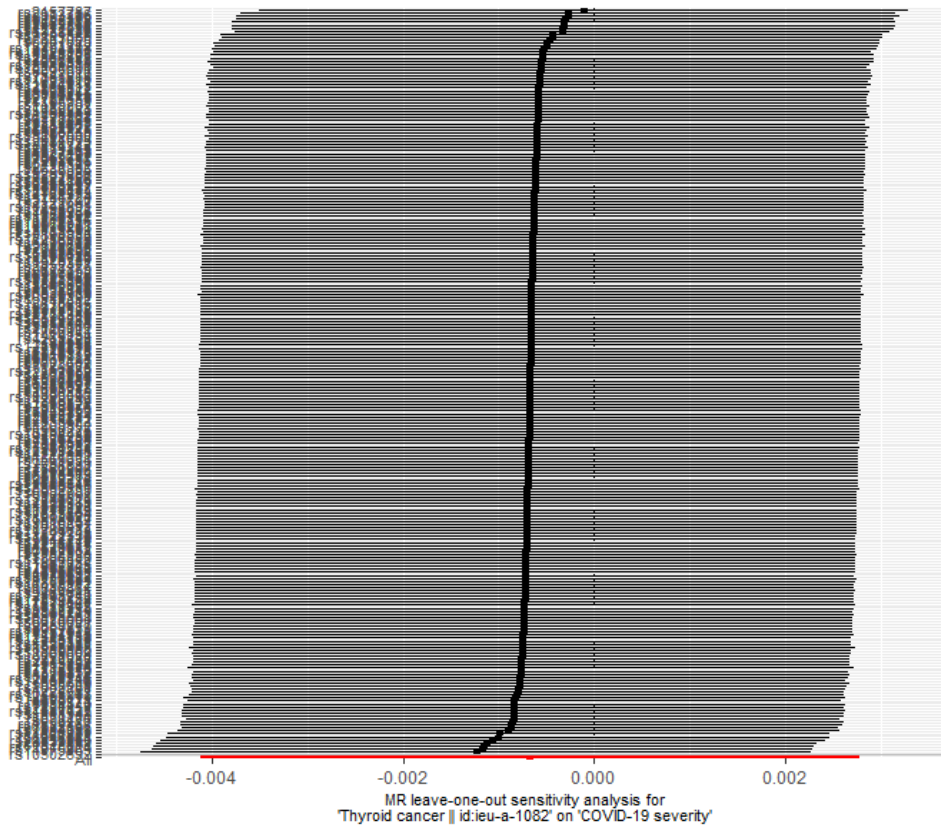

**Figure S4I.** The leave-one-out sensitivity analysis of the causal effect of thyroid cancer on COVID-19 severity.

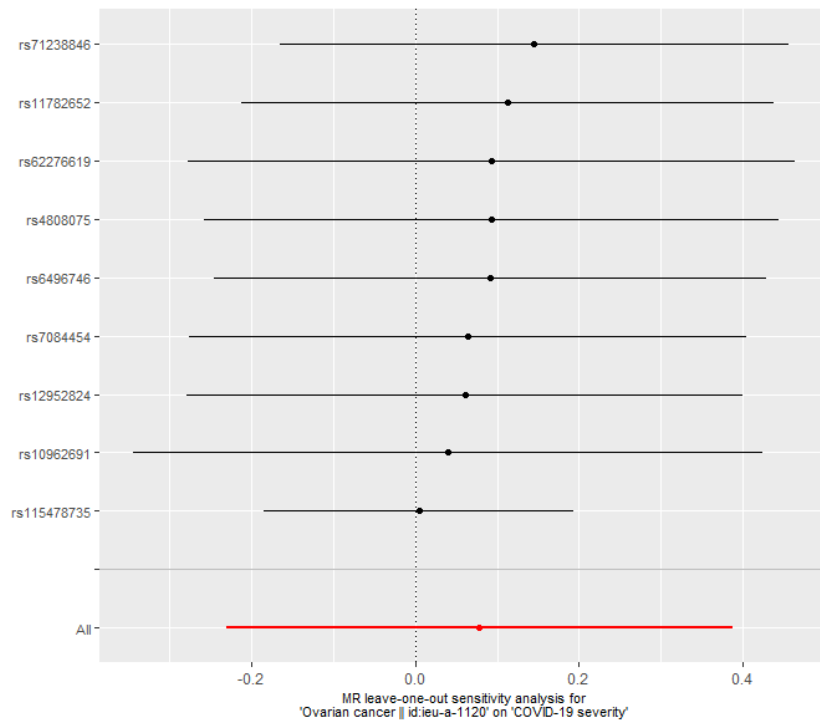

**Figure S4J.** The leave-one-out sensitivity analysis of the causal effect of ovarian cancer on COVID-19 severity.

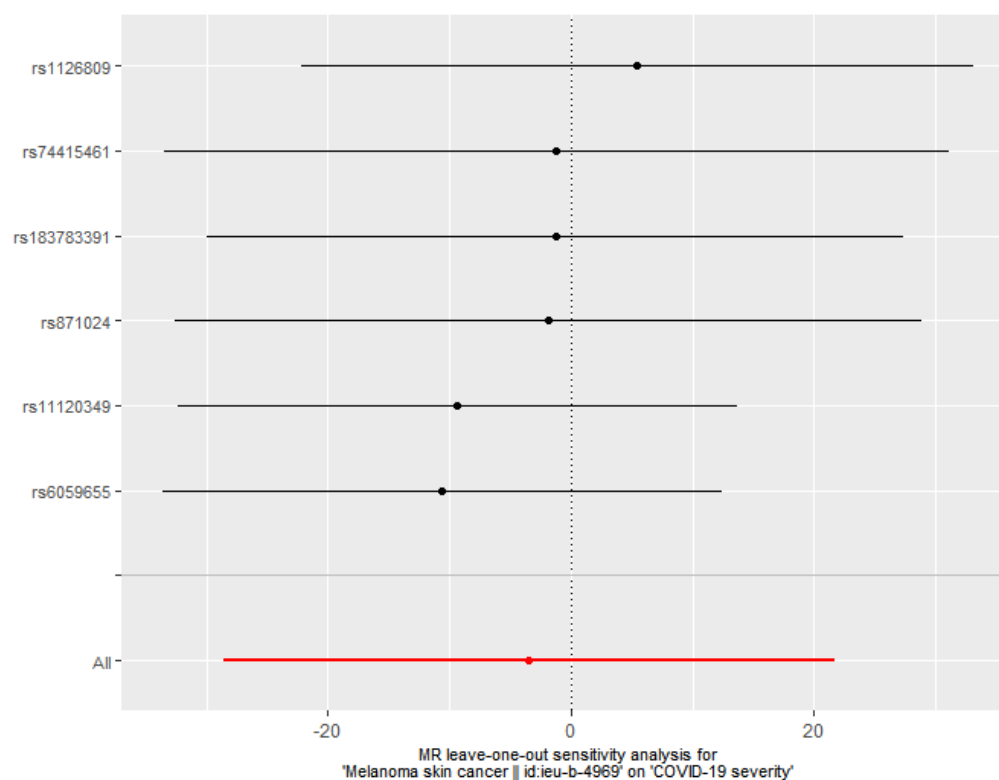

**Figure S4K.** The leave-one-out sensitivity analysis of the causal effect of melanoma on COVID-19 severity.

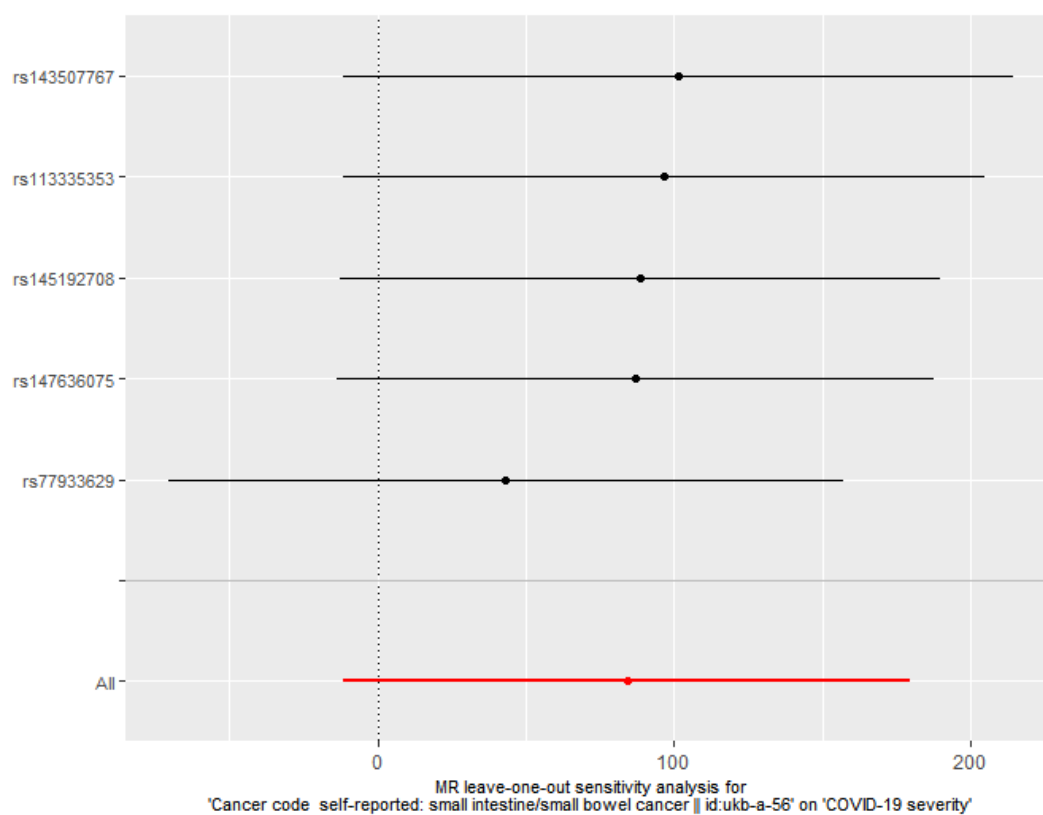

**Figure S4L.** The leave-one-out sensitivity analysis of the causal effect of small bowel cancer on COVID-19 severity.

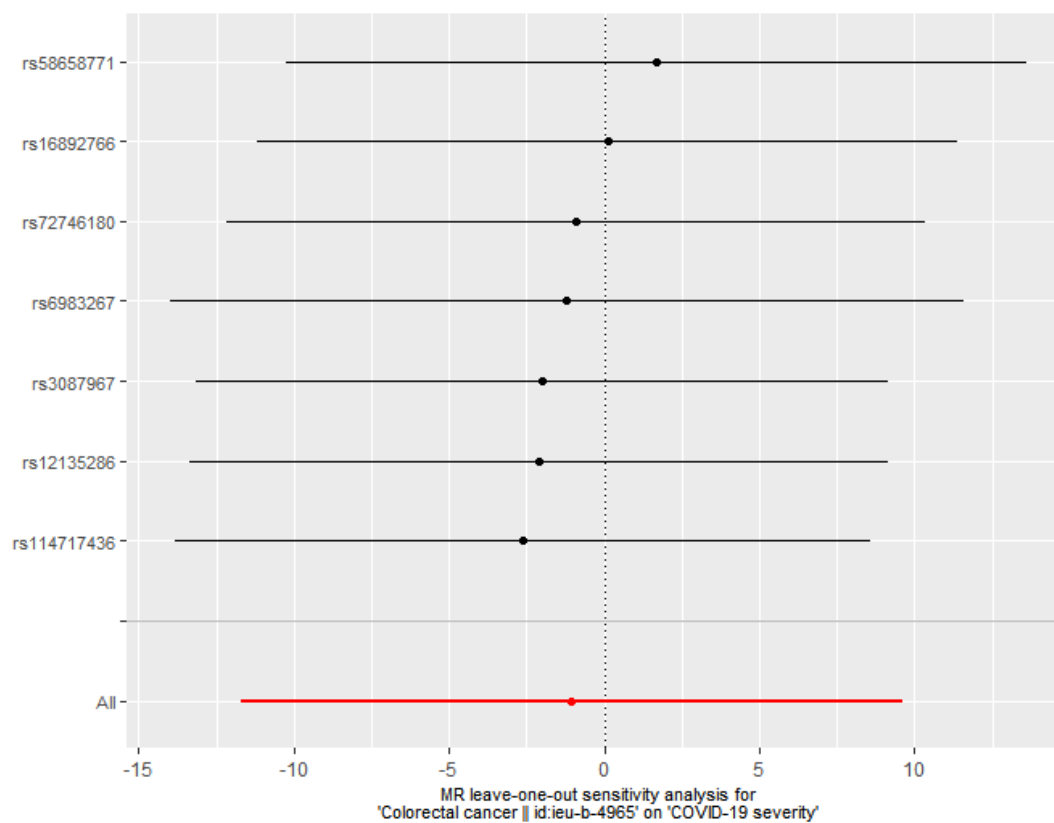

**Figure S4M.** The leave-one-out sensitivity analysis of the causal effect of colorectal cancer on COVID-19 severity.

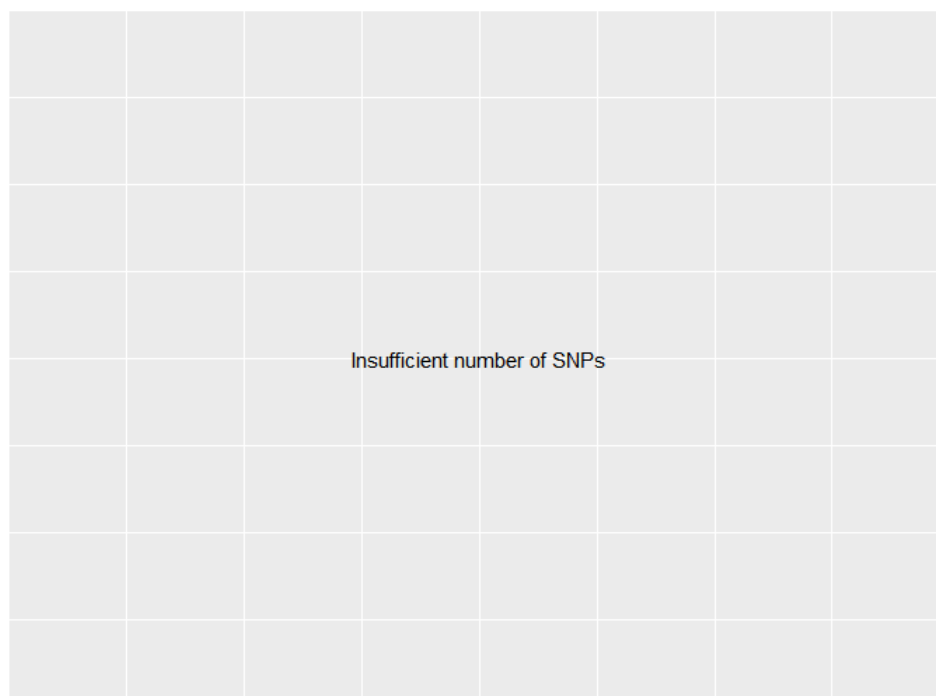

**Figure S4N.** The leave-one-out sensitivity analysis of the causal effect of oropharyngeal cancer on COVID-19 severity.

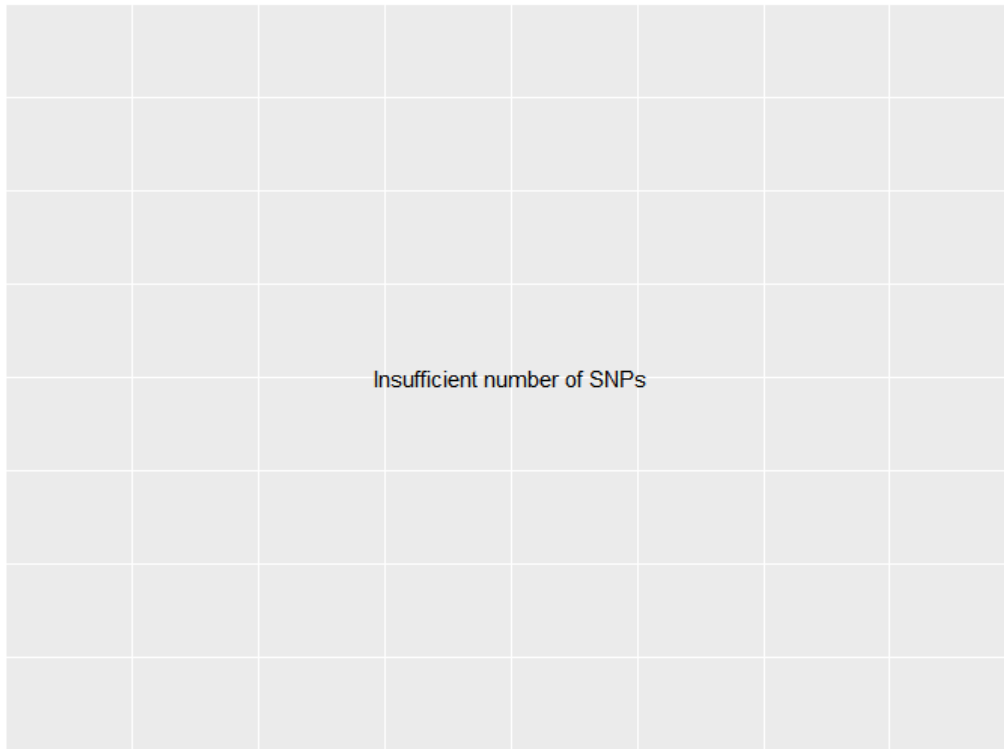

**Figure S4O.** The leave-one-out sensitivity analysis of the causal effect of lymphoma on COVID-19 severity.

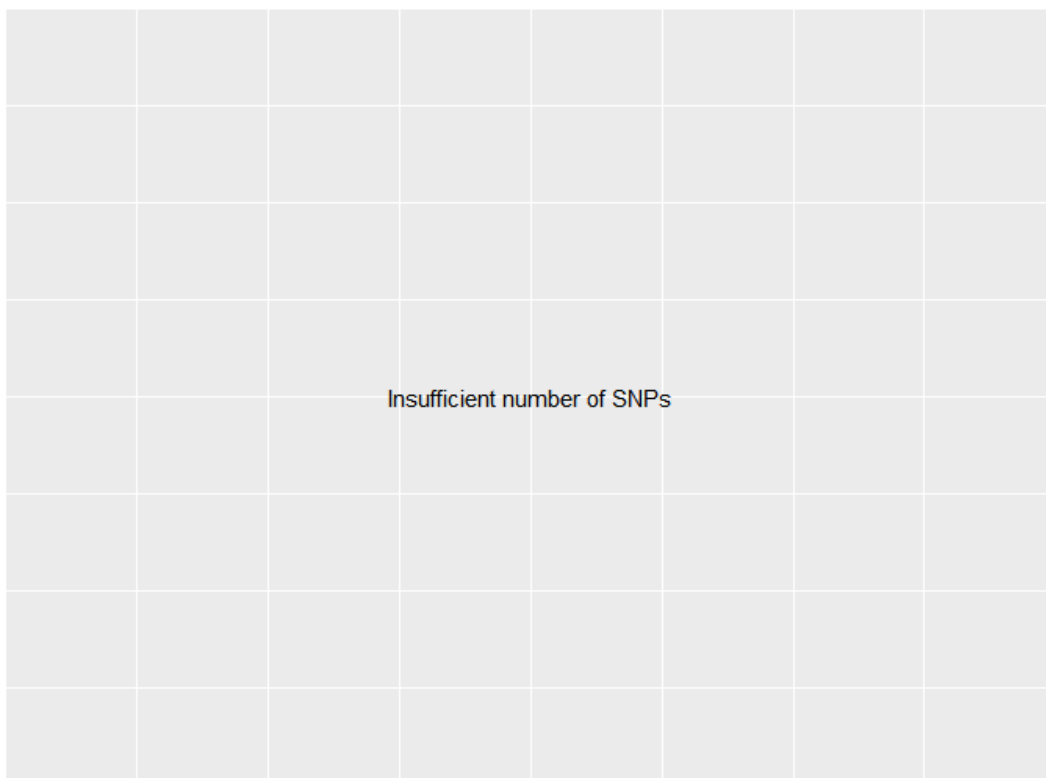

**Figure S4P.** The leave-one-out sensitivity analysis of the causal effect of cervix cancer on COVID-19 severity.

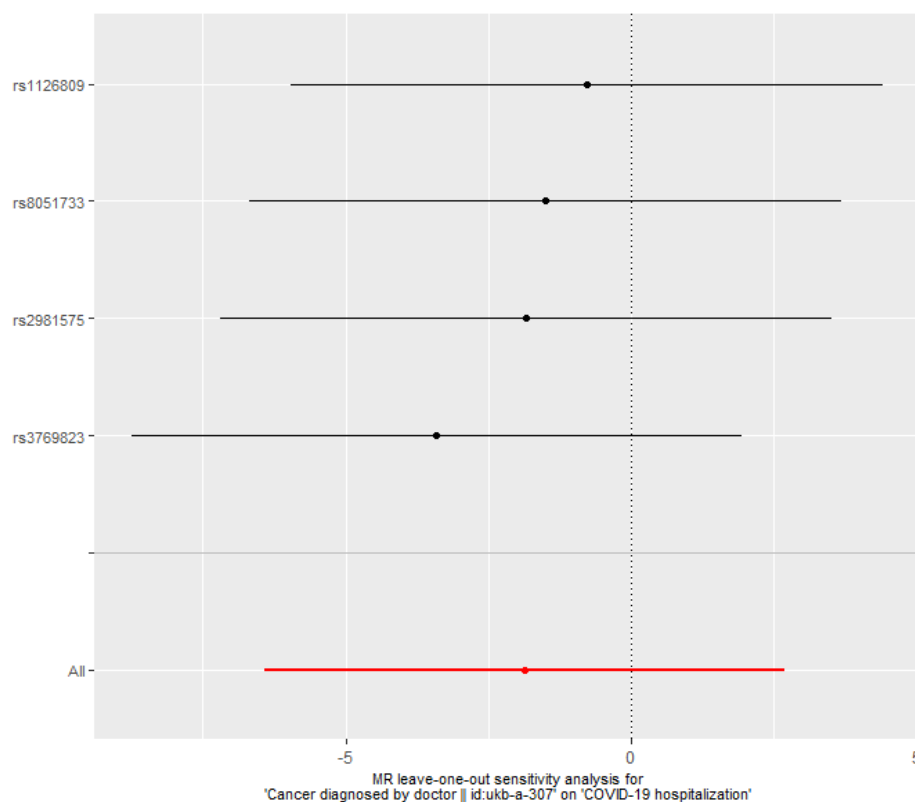

**Figure S5A.** The leave-one-out sensitivity analysis of the causal effect of overall cancer on COVID-19 hospitalization.

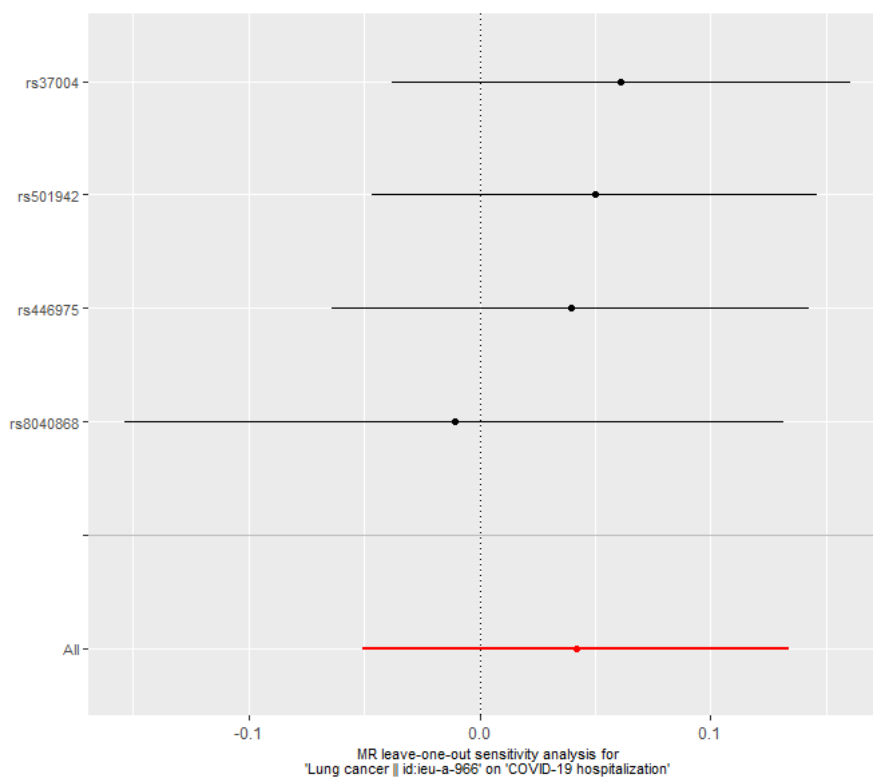

**Figure S5B.** The leave-one-out sensitivity analysis of the causal effect of lung cancer on COVID-19 hospitalization.

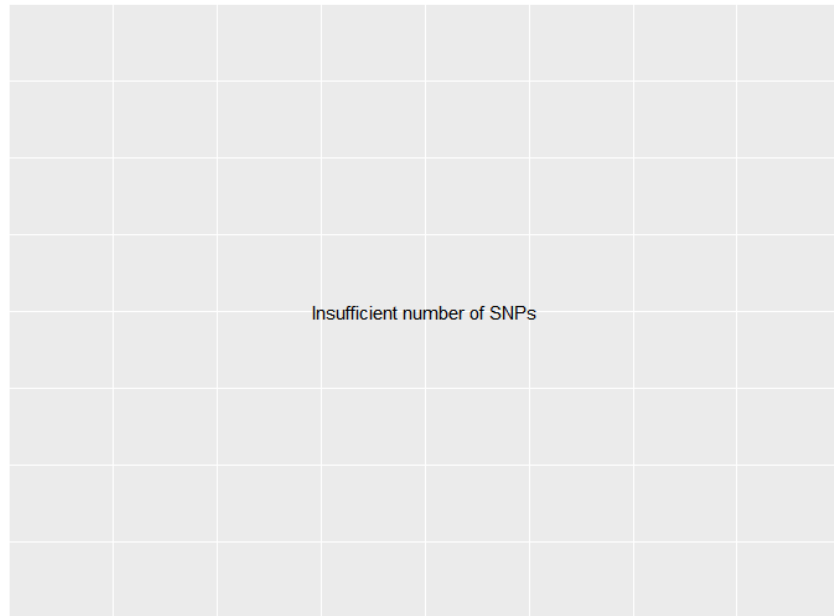

**Figure S5C.** The leave-one-out sensitivity analysis of the causal effect of squamous cell lung cancer on COVID-19 hospitalization.

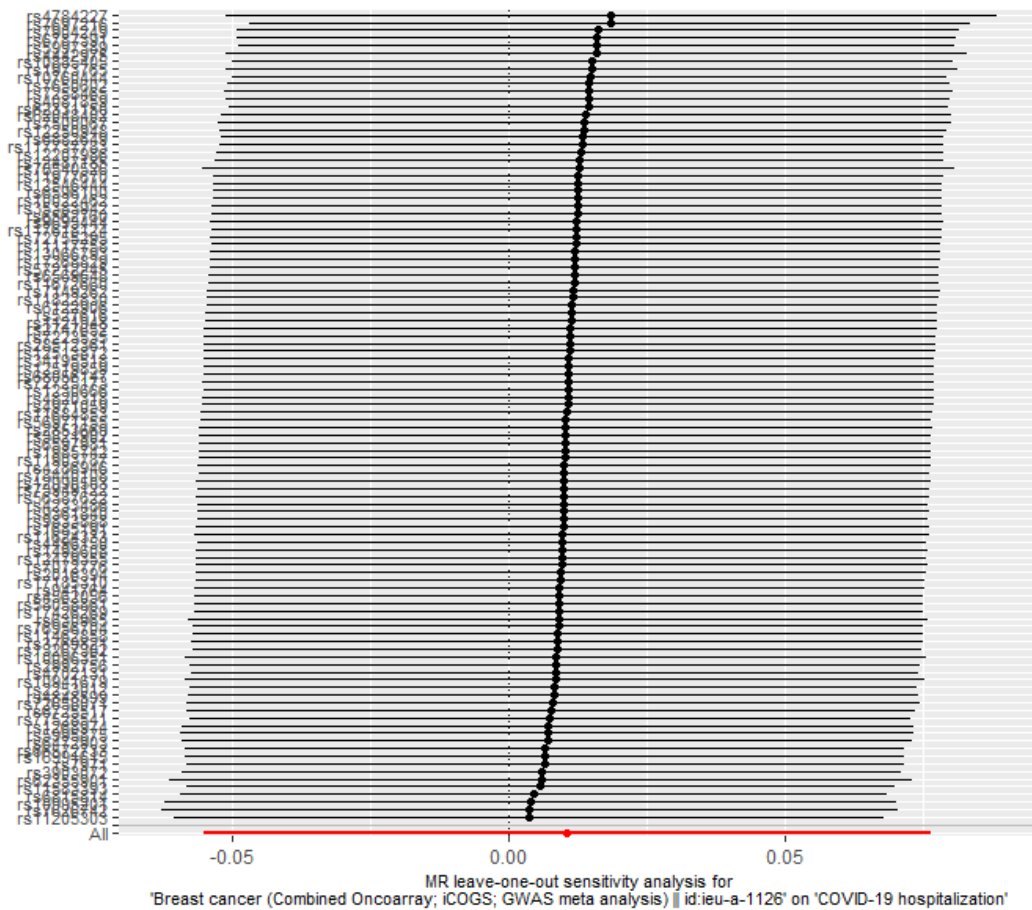

**Figure S5D.** The leave-one-out sensitivity analysis of the causal effect of breast cancer on COVID-19 hospitalization.

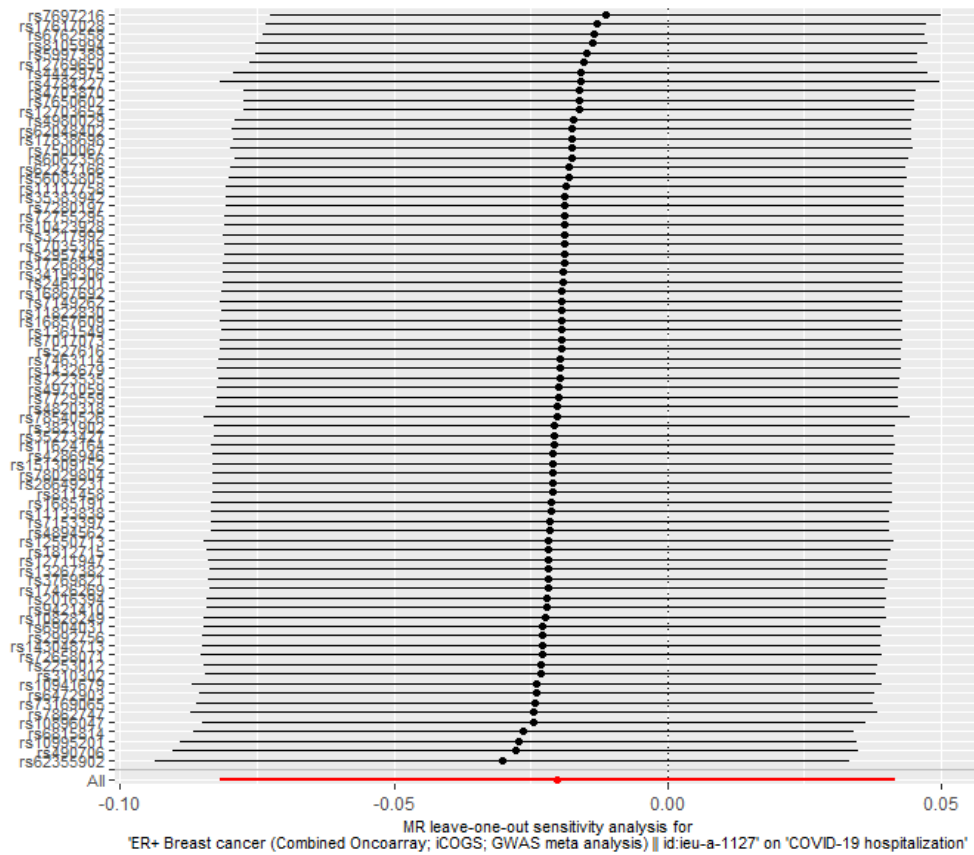

**Figure S5E.** The leave-one-out sensitivity analysis of the causal effect of ER+ breast cancer on COVID-19 hospitalization.

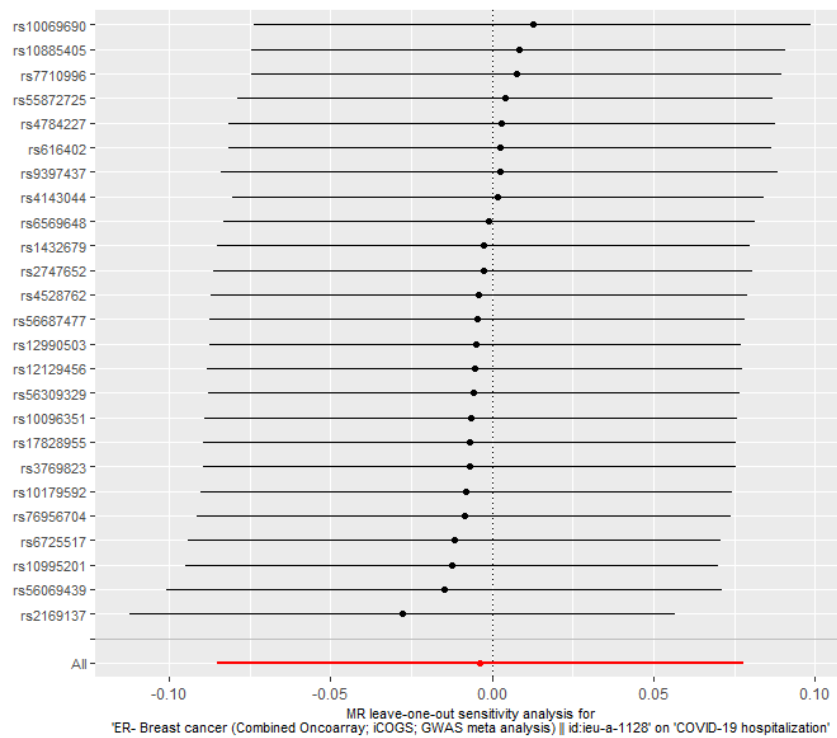

**Figure S5F.** The leave-one-out sensitivity analysis of the causal effect of ER- breast cancer on COVID-19 hospitalization.

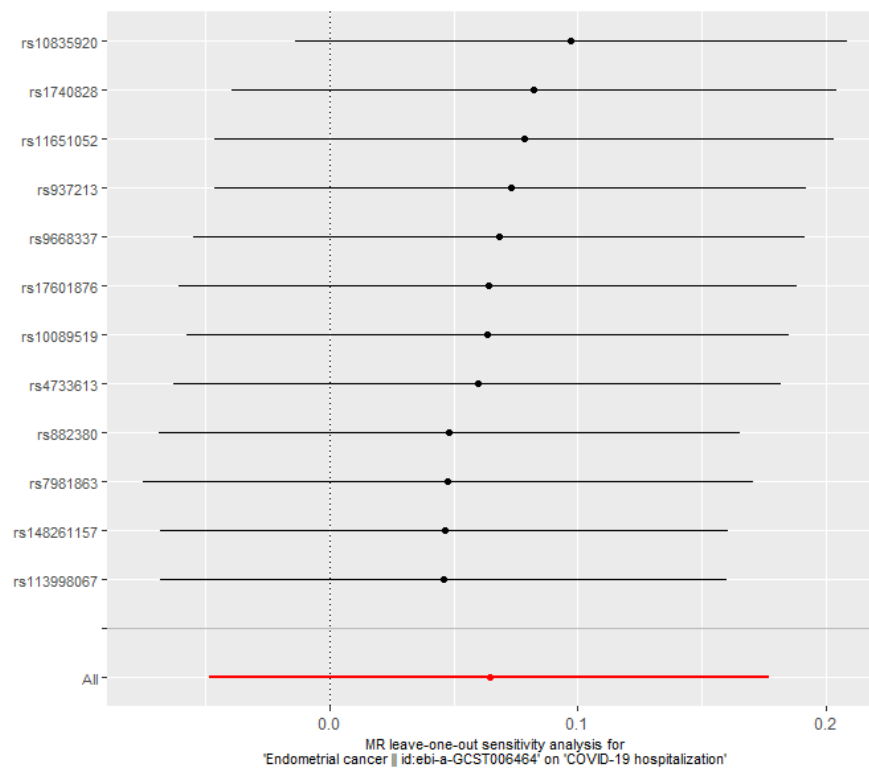

**Figure S5G.** The leave-one-out sensitivity analysis of the causal effect of endometrial cancer on COVID-19 hospitalization.

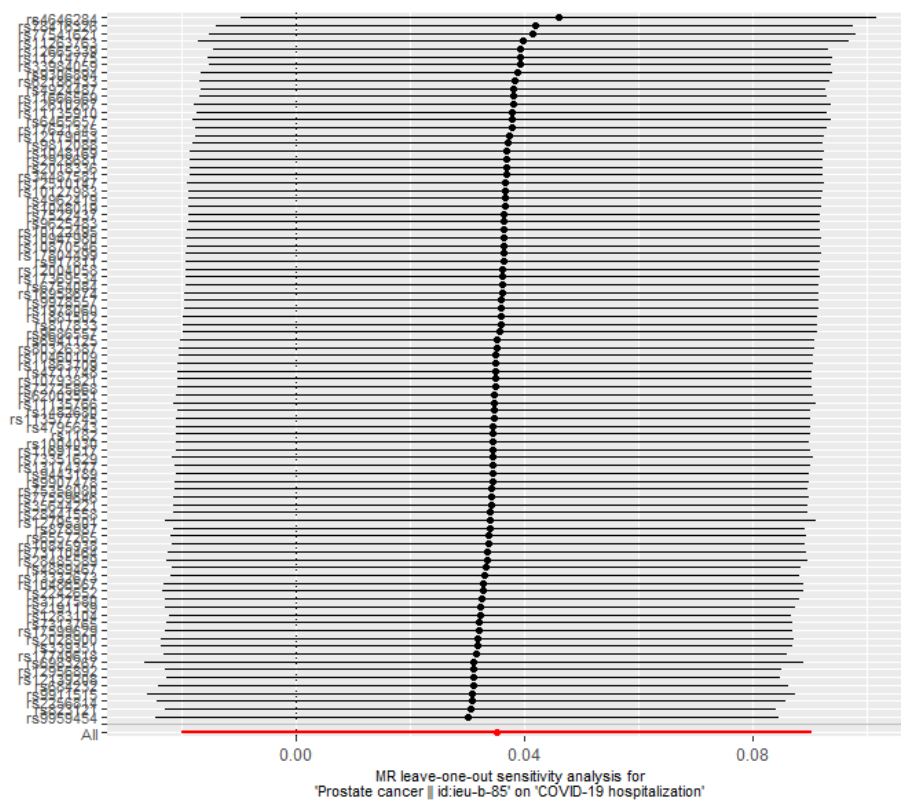

**Figure S5H.** The leave-one-out sensitivity analysis of the causal effect of prostate cancer on COVID-19 hospitalization.



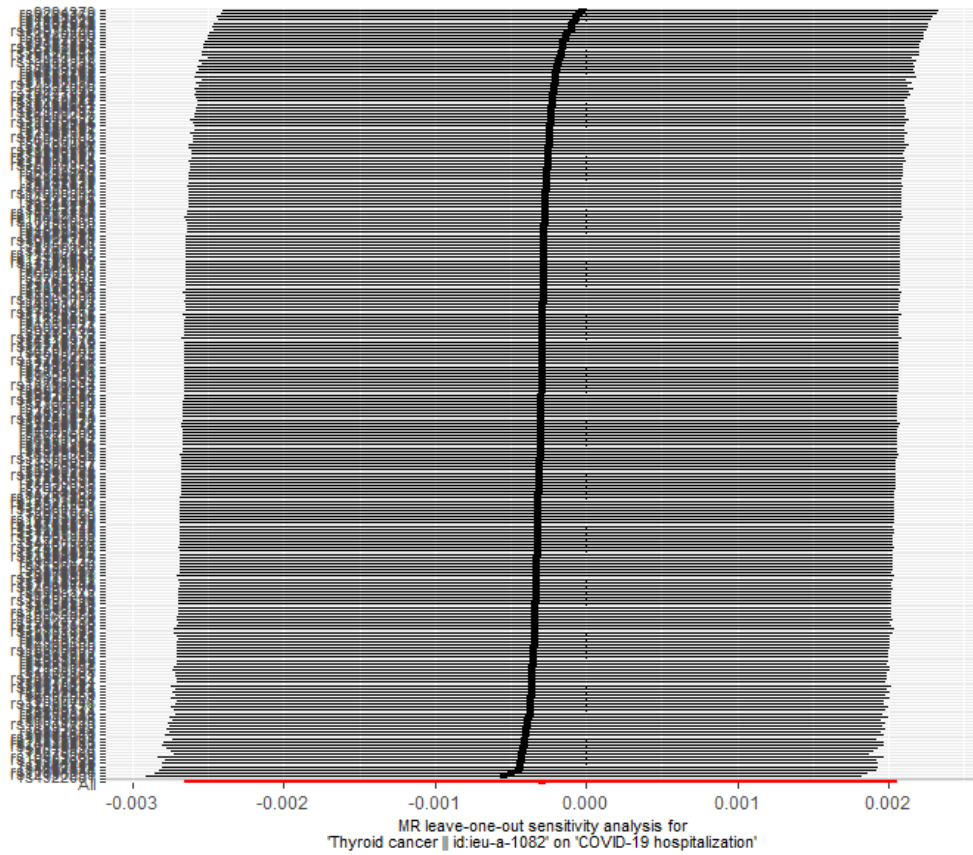

**Figure S5I.** The leave-one-out sensitivity analysis of the causal effect of thyroid cancer on COVID-19 hospitalization.

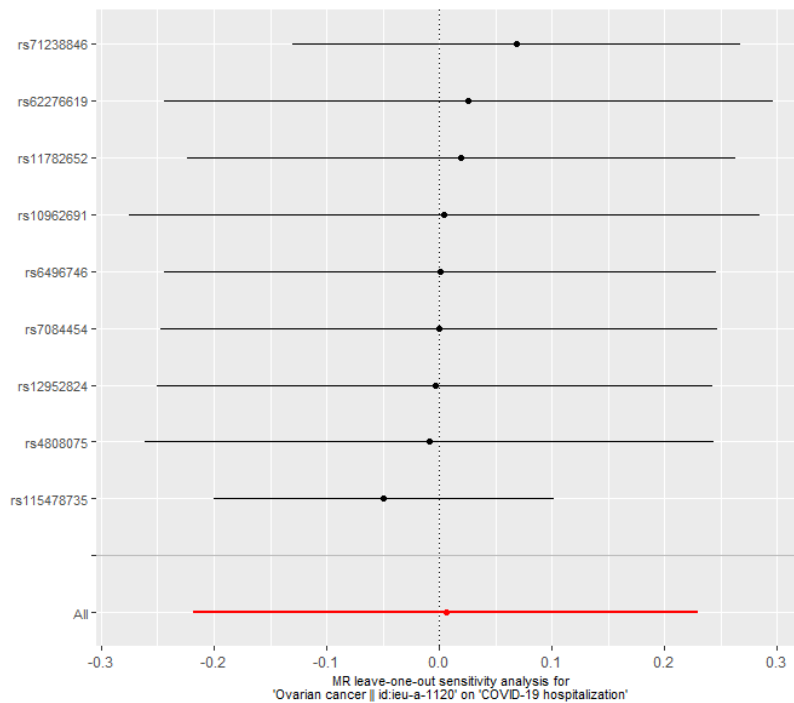

**Figure S5J.** The leave-one-out sensitivity analysis of the causal effect of ovarian cancer on COVID-19 hospitalization.

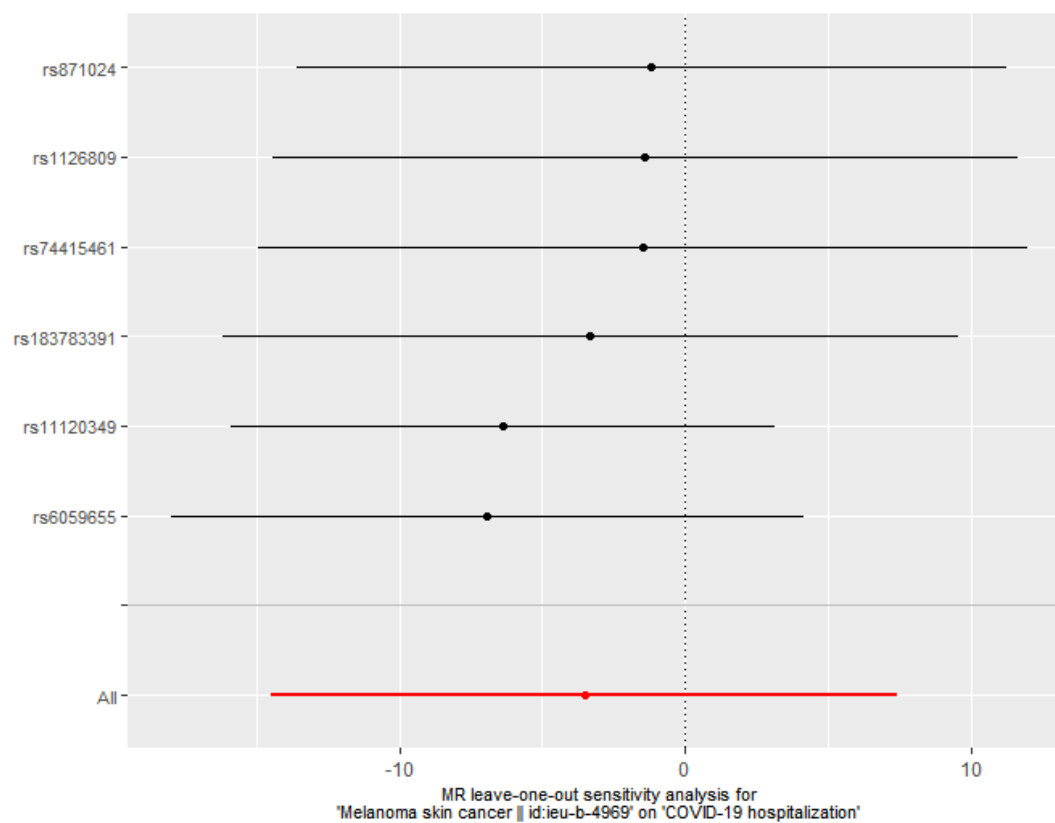

**Figure S5K.** The leave-one-out sensitivity analysis of the causal effect of melanoma on COVID-19 hospitalization.

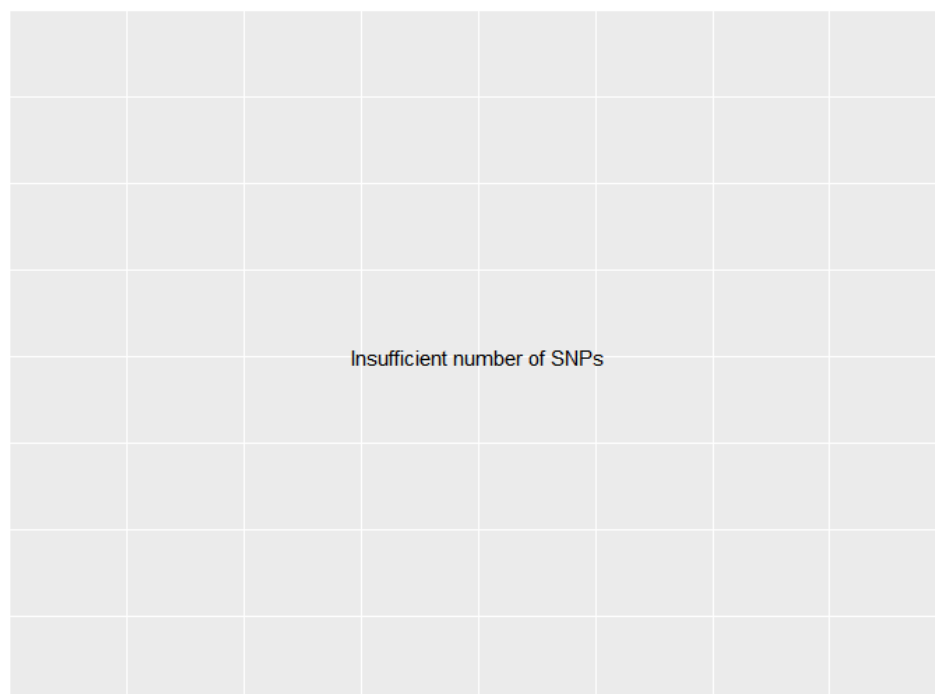

**Figure S5L.** The leave-one-out sensitivity analysis of the causal effect of small bowel cancer on COVID-19 hospitalization.

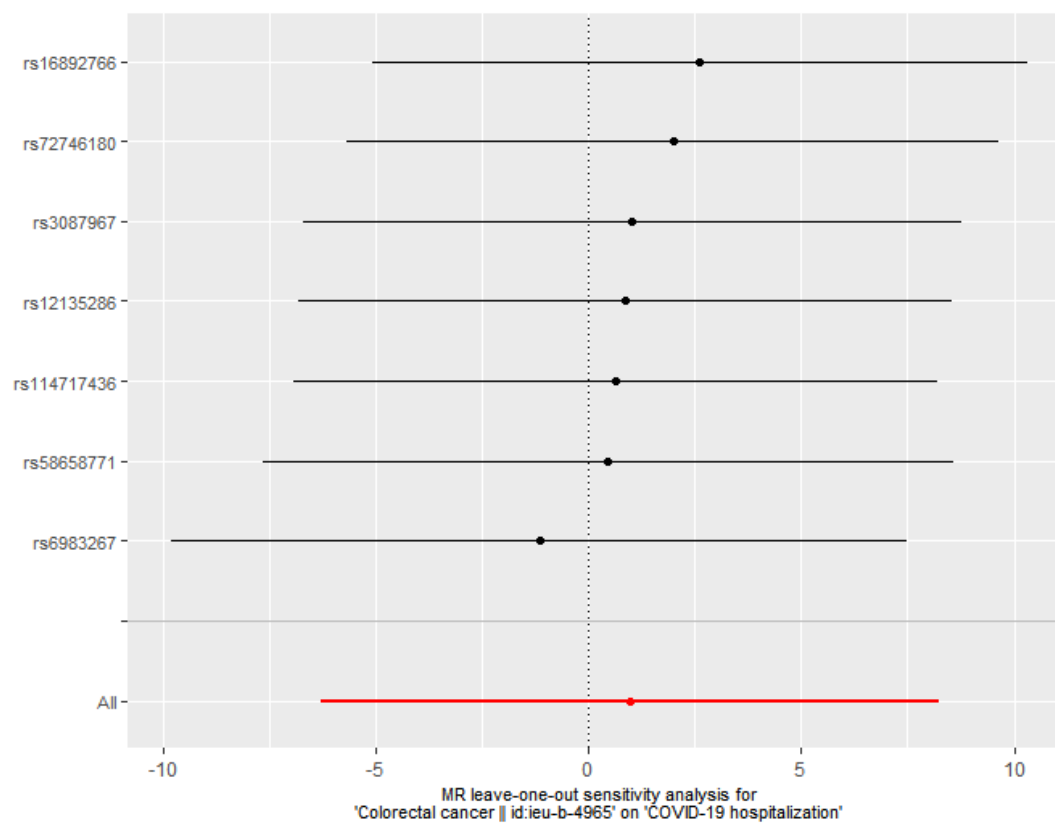

**Figure S5L.** The leave-one-out sensitivity analysis of the causal effect of colorectal cancer on COVID-19 hospitalization.



**Figure S5N.** The leave-one-out sensitivity analysis of the causal effect of oropharyngeal cancer on COVID-19 hospitalization.

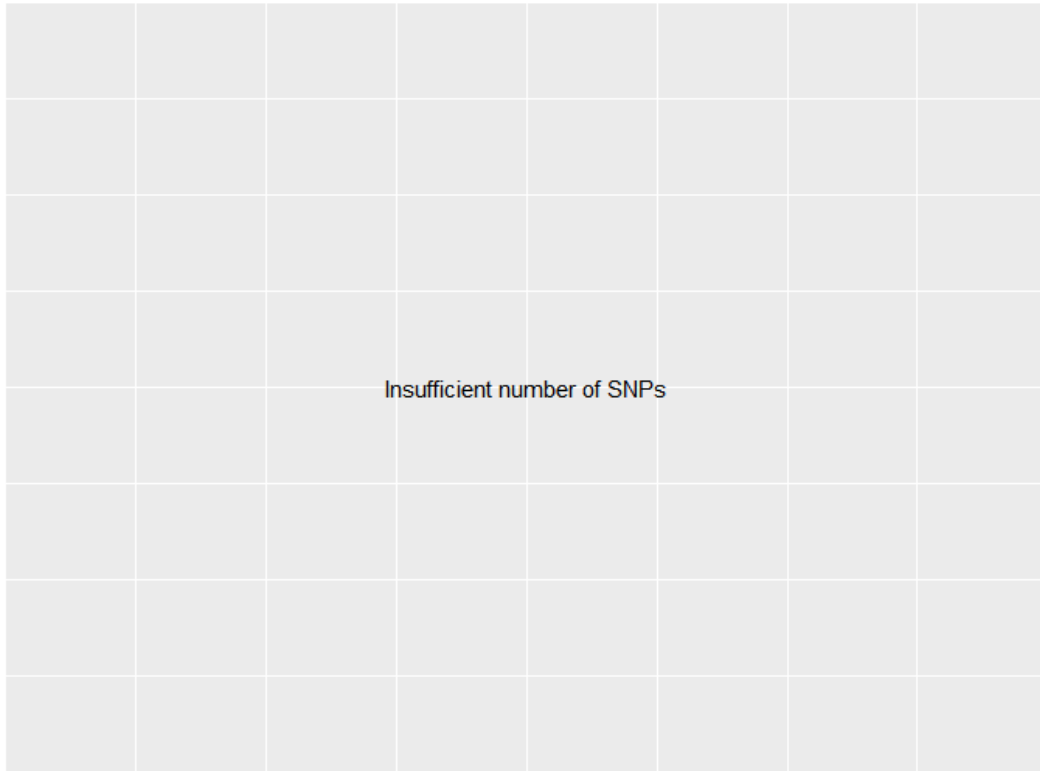

**Figure S5O.** The leave-one-out sensitivity analysis of the causal effect of lymphoma on COVID-19 hospitalization.

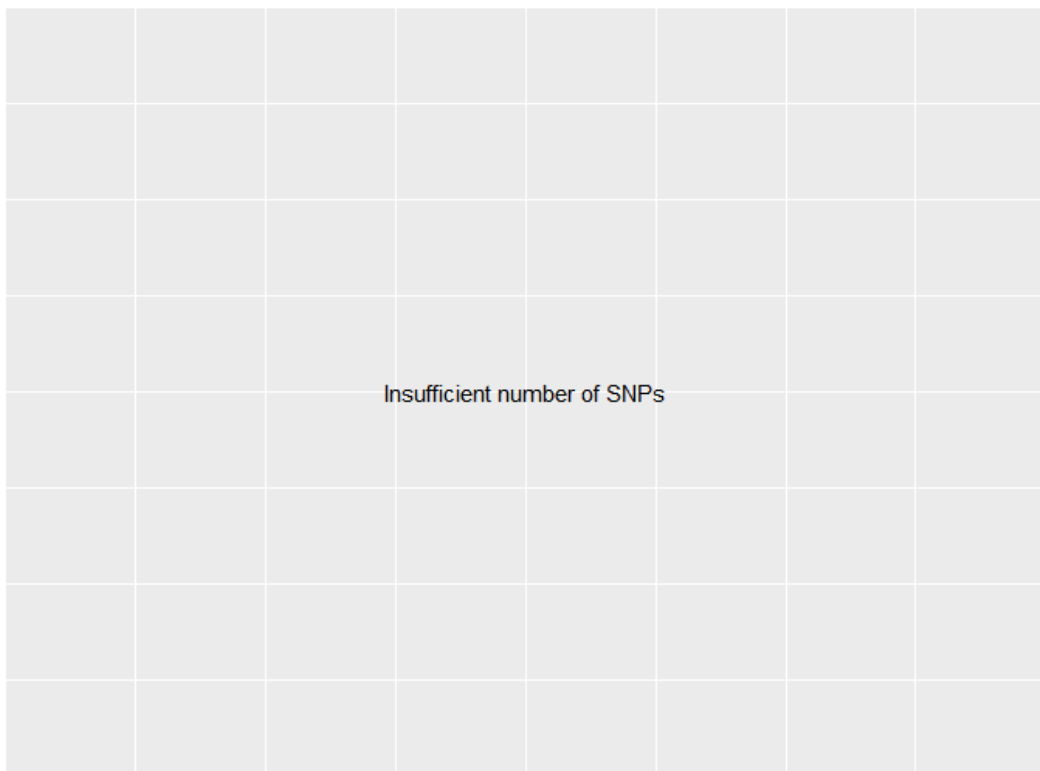

**Figure S5P.** The leave-one-out sensitivity analysis of the causal effect of cervix cancer on COVID-19 hospitalization.

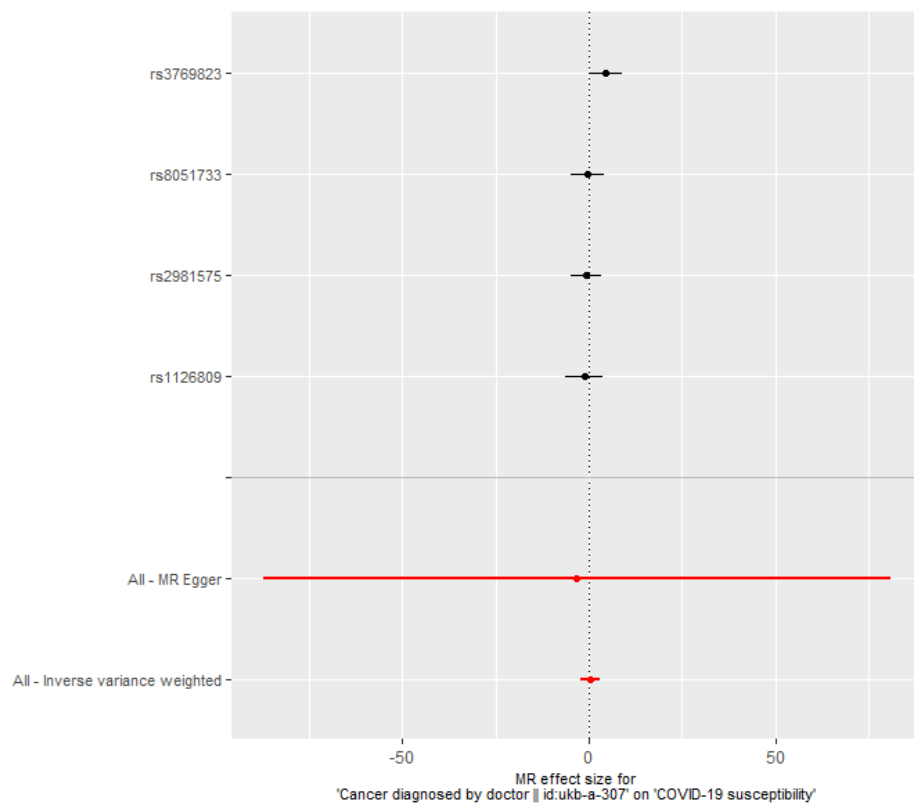

**Figure S6A.** The leave-one-out sensitivity analysis of the causal effect of overall cancer on COVID-19 susceptibility.

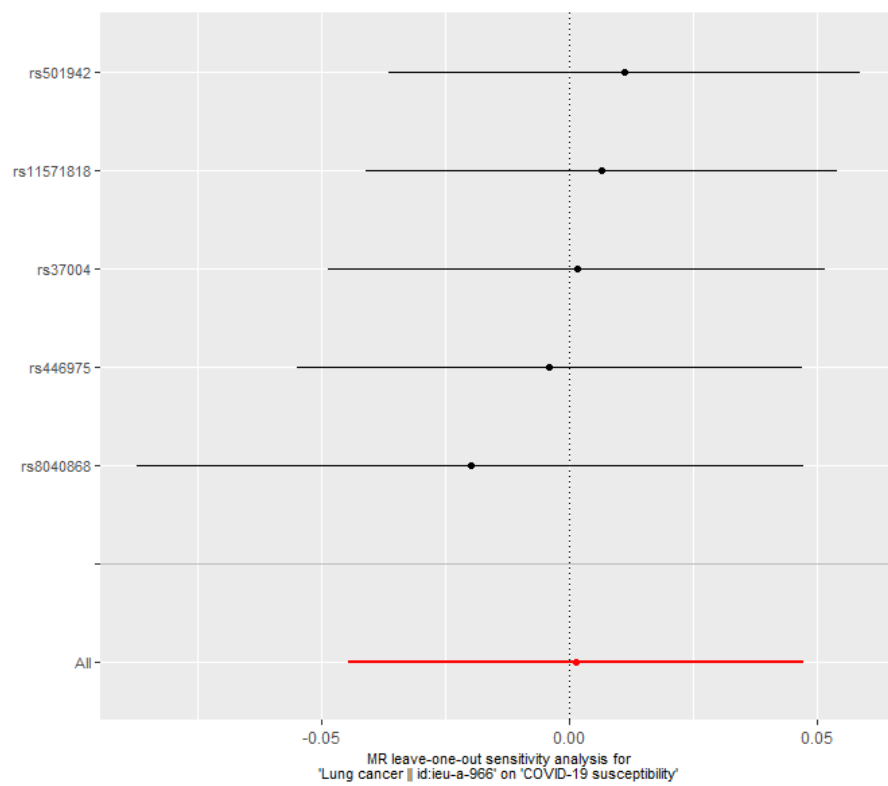

**Figure S6B.** The leave-one-out sensitivity analysis of the causal effect of lung cancer on COVID-19 susceptibility.

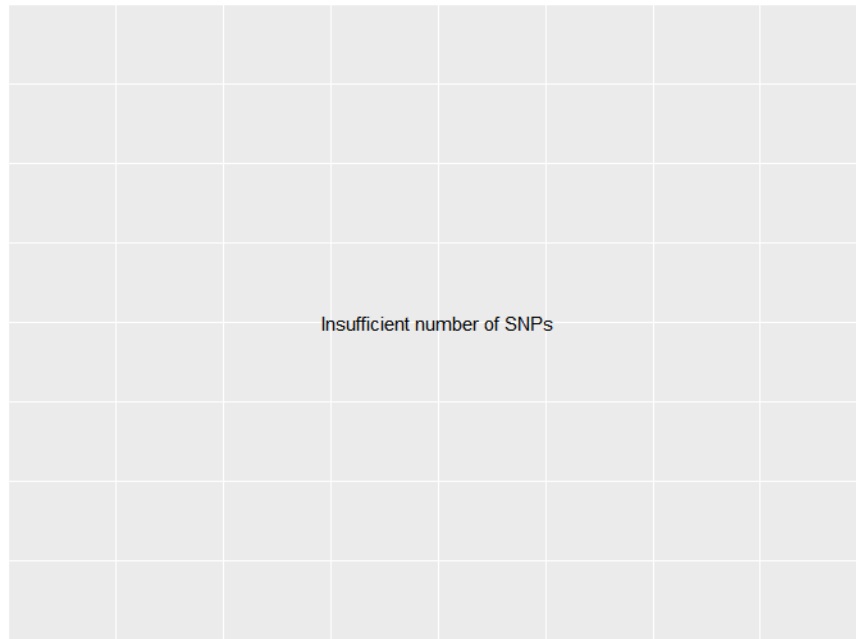

**Figure S6C.** The leave-one-out sensitivity analysis of the causal effect of squamous cell lung cancer on COVID-19 susceptibility.

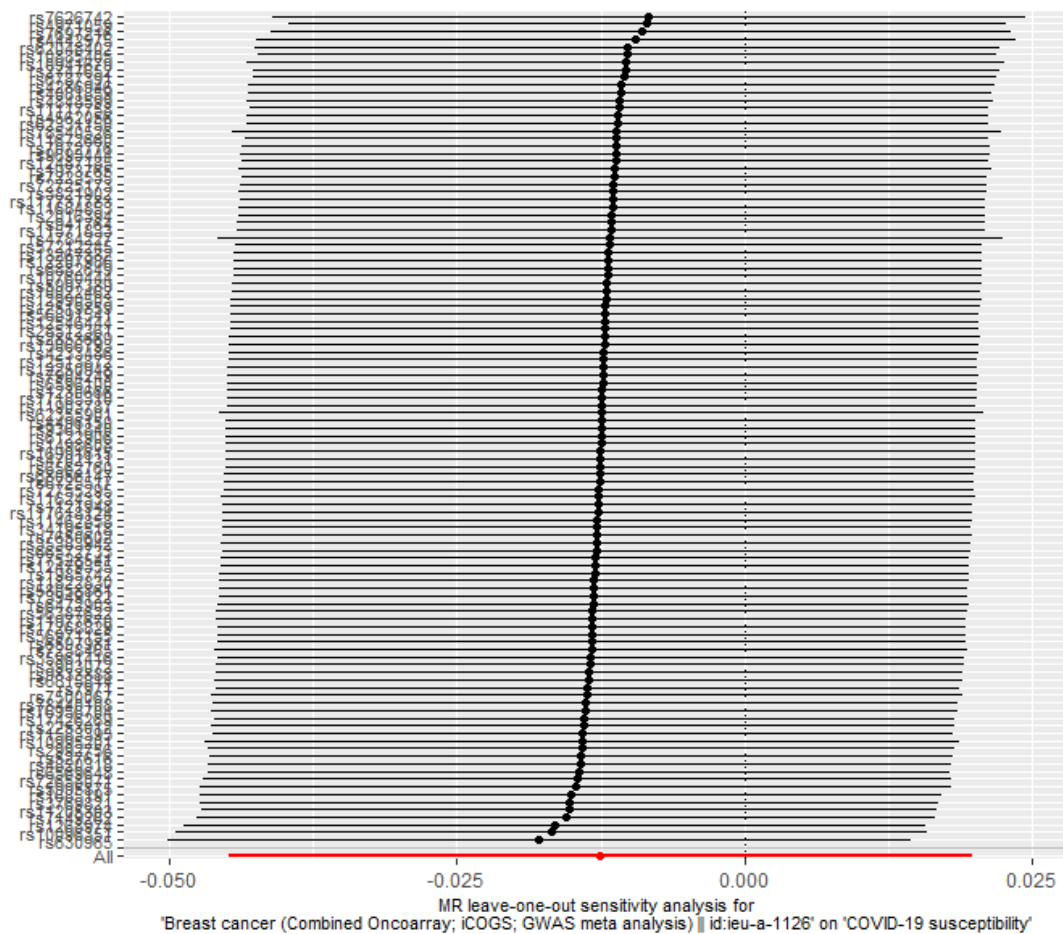

**Figure S6D.** The leave-one-out sensitivity analysis of the causal effect of breast cancer on COVID-19 susceptibility.

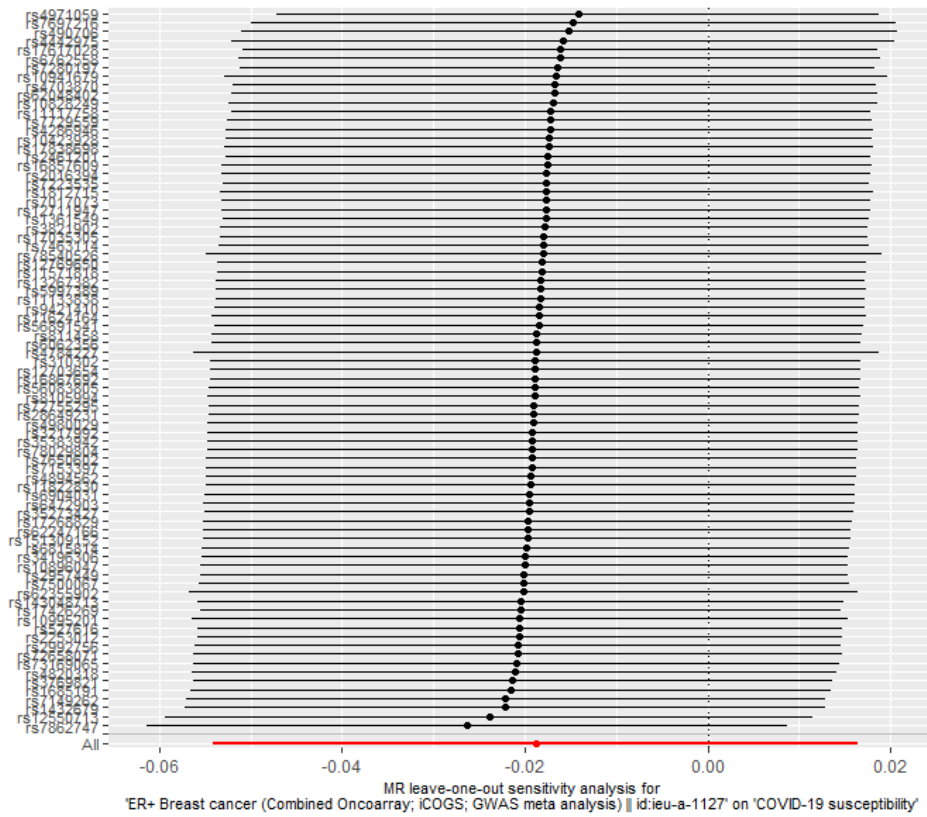

**Figure S6E.** The leave-one-out sensitivity analysis of the causal effect of ER+ breast cancer on COVID-19 susceptibility.

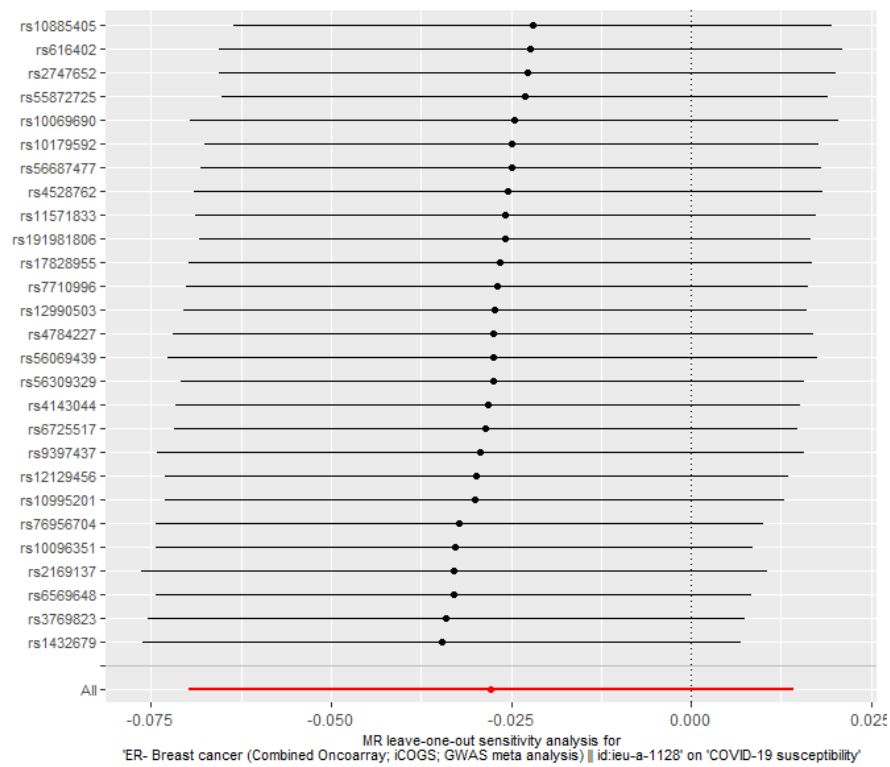

**Figure S6F.** The leave-one-out sensitivity analysis of the causal effect of ER- breast cancer on COVID-19 susceptibility.





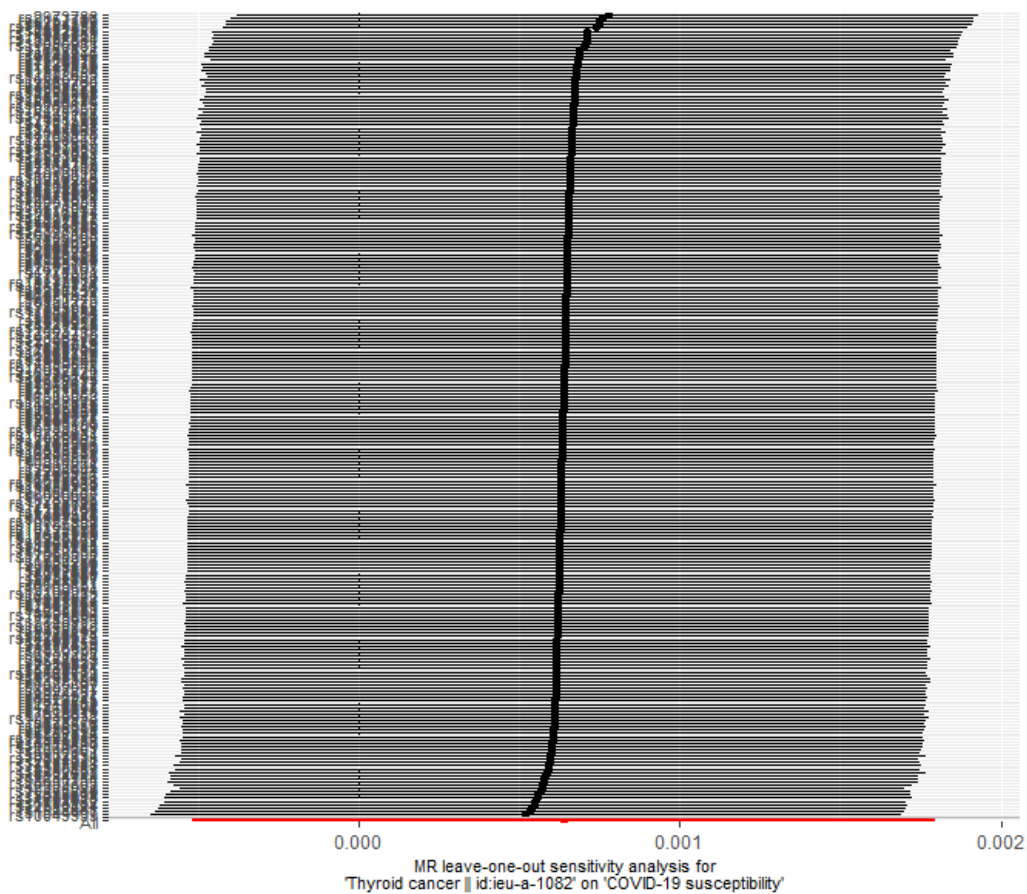

**Figure S6I.** The leave-one-out sensitivity analysis of the causal effect of thyroid cancer on COVID-19 susceptibility.

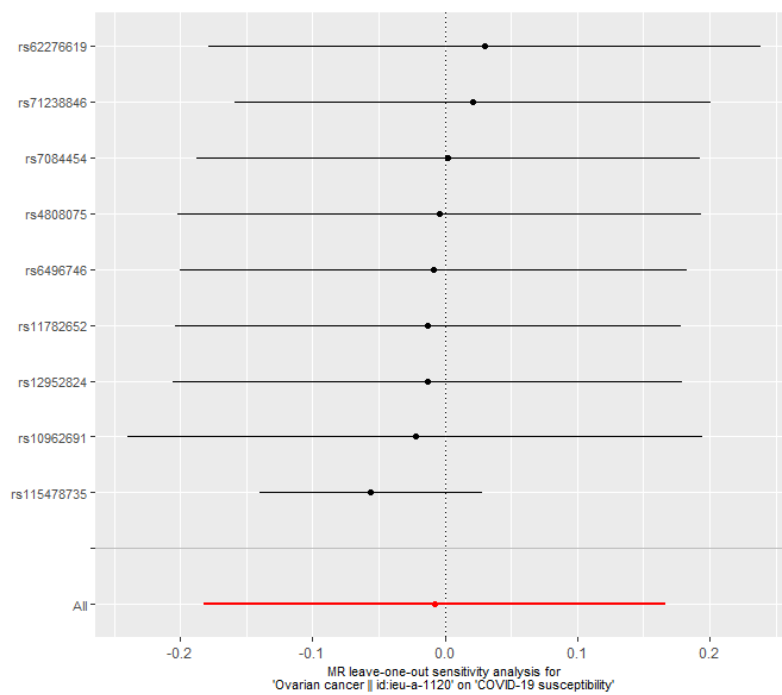

**Figure S6J.** The leave-one-out sensitivity analysis of the causal effect of ovarian cancer on COVID-19 susceptibility.

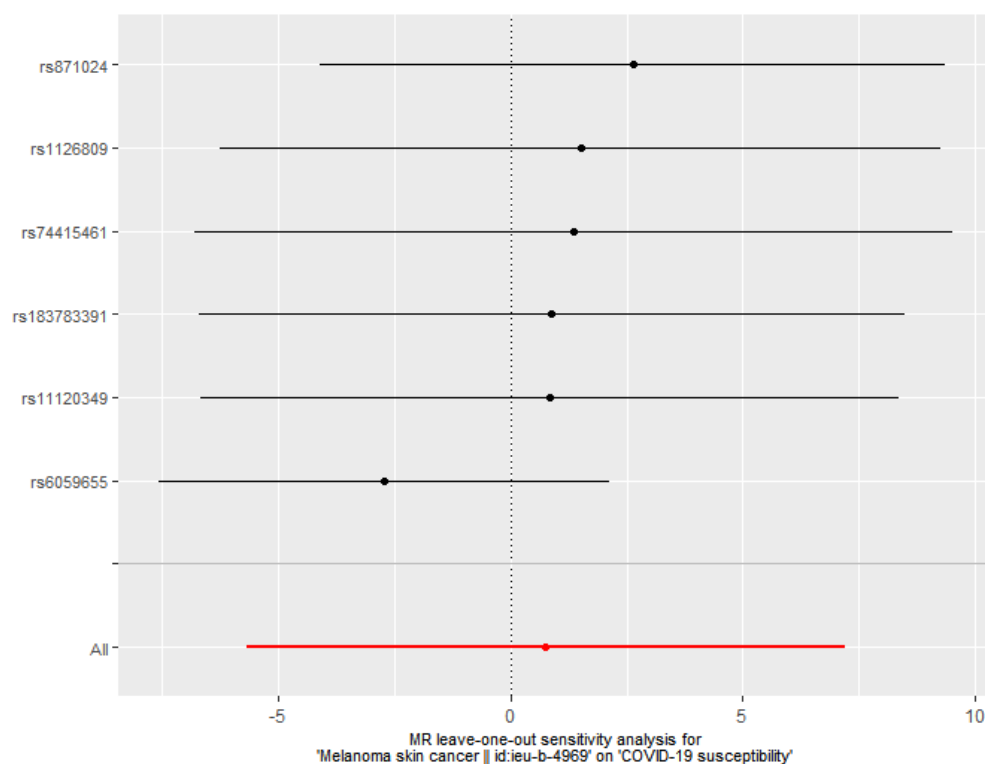

**Figure S6K.** The leave-one-out sensitivity analysis of the causal effect of melanoma on COVID-19 susceptibility.

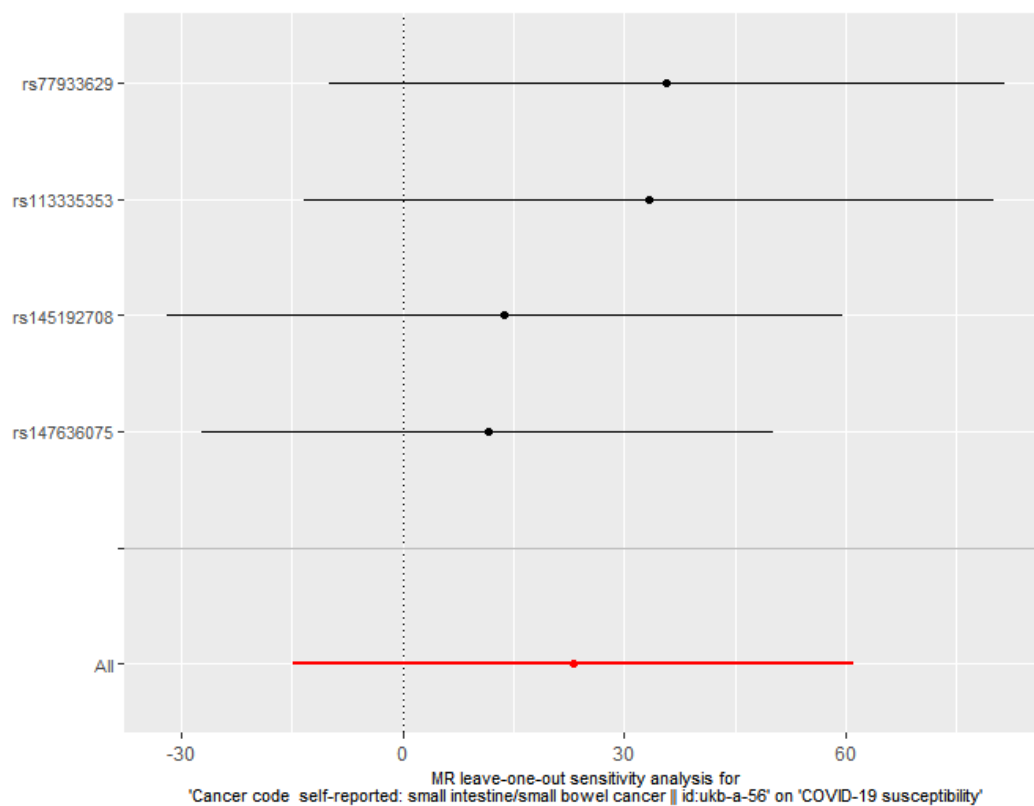

**Figure S6L.** The leave-one-out sensitivity analysis of the causal effect of small bowel cancer on COVID-19 susceptibility.

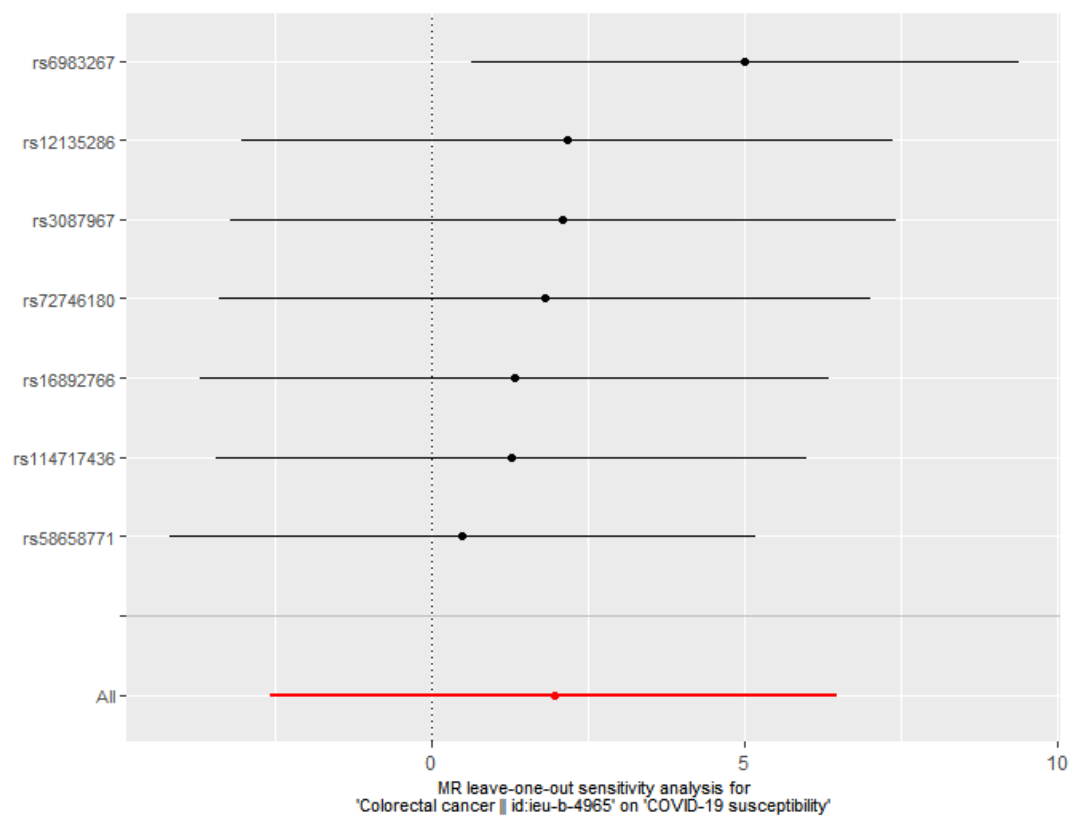

**Figure S6M.** The leave-one-out sensitivity analysis of the causal effect of colorectal cancer on COVID-19 susceptibility.

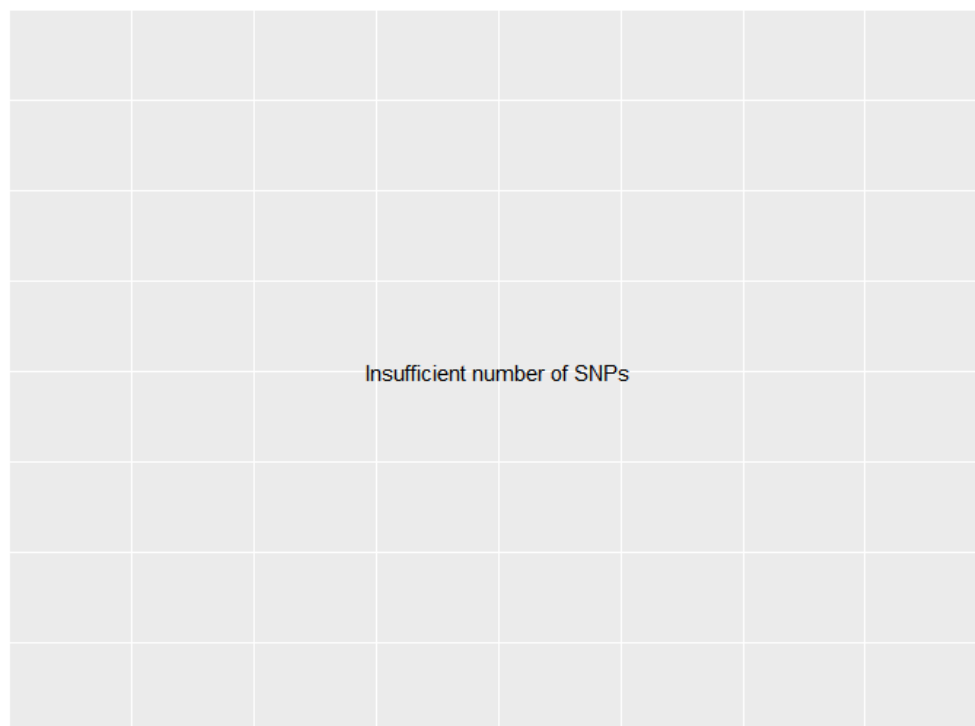

**Figure S6N.** The leave-one-out sensitivity analysis of the causal effect of oropharyngeal cancer on COVID-19 susceptibility.

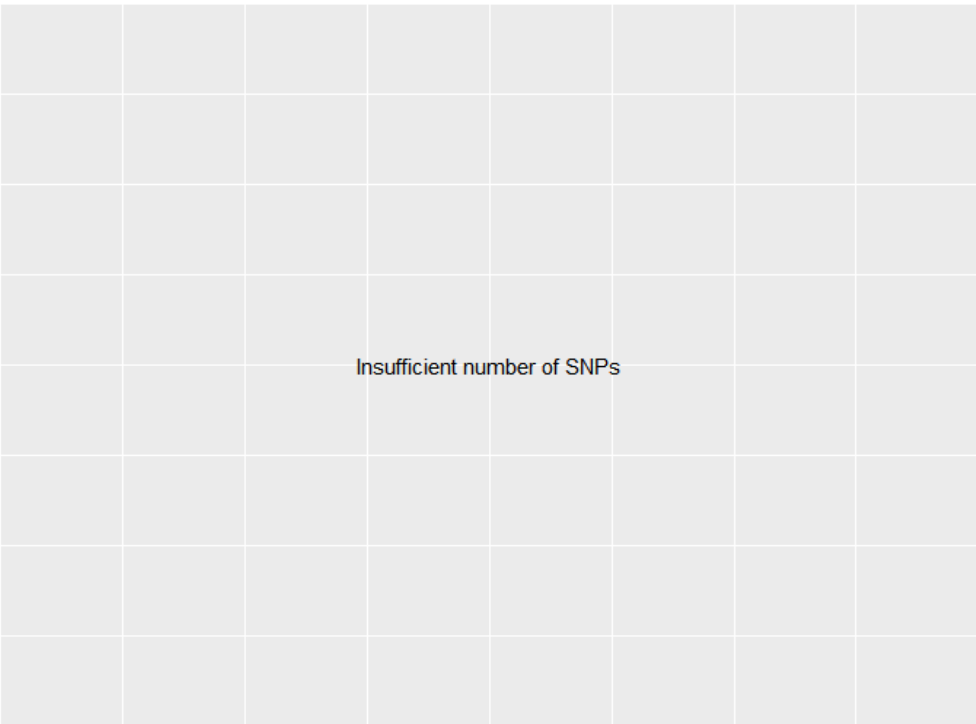

**Figure S6O.** The leave-one-out sensitivity analysis of the causal effect of lymphoma on COVID-19 susceptibility.

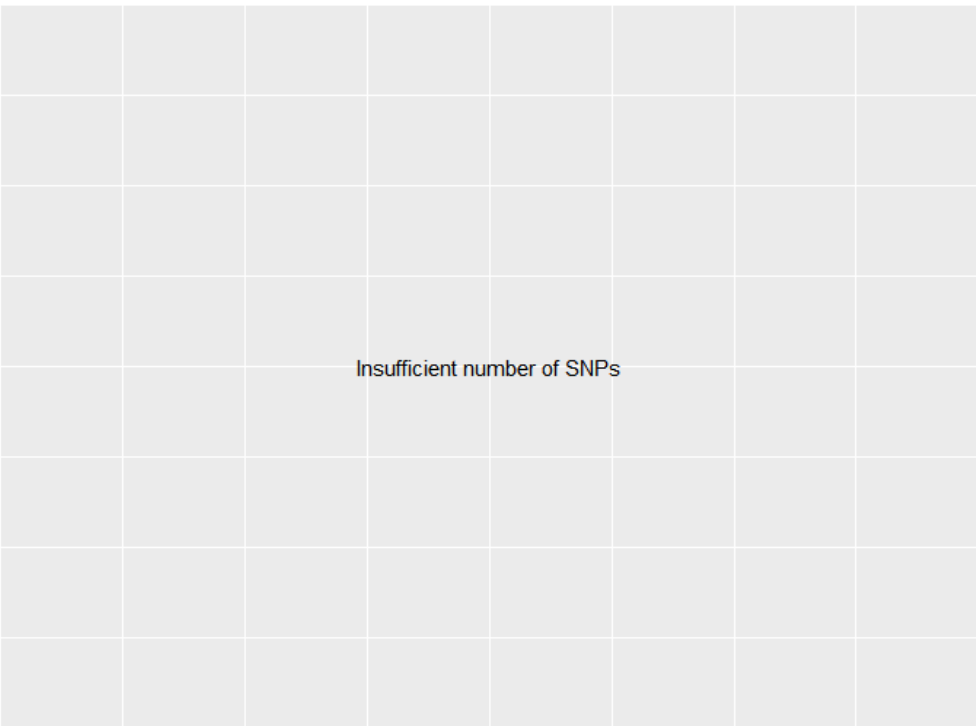

**Figure S6P.** The leave-one-out sensitivity analysis of the causal effect of cervix cancer on COVID-19 susceptibility.

**Table S3.** Causal effects of cancers on COVID-19 severity estimated by multivariable Mendelian randomization.

| Variable adjustment       | BMI |         |       |          | Education attainment |         |        |          | Intelligence |         |       |          | Income |         |        |          | Smoking |         |       |          | Alcohol consumption |         |       |          |       |      |
|---------------------------|-----|---------|-------|----------|----------------------|---------|--------|----------|--------------|---------|-------|----------|--------|---------|--------|----------|---------|---------|-------|----------|---------------------|---------|-------|----------|-------|------|
| Cancer                    | SNP | $\beta$ | SE    | <i>p</i> | SNP                  | $\beta$ | SE     | <i>p</i> | SNP          | $\beta$ | SE    | <i>p</i> | SNP    | $\beta$ | SE     | <i>p</i> | SNP     | $\beta$ | SE    | <i>p</i> | SNP                 | $\beta$ | SE    | <i>p</i> |       |      |
| Overall cancer            | -   | -       | -     | -        | 2                    | 2.13    | 2.59   | 0.41     | 4            | -2.91   | 3.03  | 0.34     | 4      | 0.71    | 3.30   | 0.83     | 4       | -2.76   | 3.69  | 0.45     | -                   | -       | -     | -        |       |      |
| Lung cancer               | 2   | 0.03    | 0.07  | 0.70     | 4                    | 0.08    | 0.06   | 0.18     | 5            | 0.03    | 0.07  | 0.61     | 5      | 0.04    | 0.06   | 0.51     | 5       | -0.05   | 0.09  | 0.59     | 4                   | -0.03   | 0.11  | 0.77     |       |      |
| Squamous cell lung cancer | 1   | 0.01    | 0.06  | 0.80     | 1                    | 0.01    | 0.07   | 0.87     | 1            | 0.03    | 0.10  | 0.75     | 1      | 0.06    | 0.12   | 0.62     | 3.0     | -0.05   | 0.11  | 0.62     | 2.0                 | 0.04    | 0.12  | 0.72     |       |      |
| Breast cancer             | 37  | 0.11    | 0.07  | 0.12     | 73                   | 0.02    | 0.06   | 0.67     | 87           | 0.05    | 0.05  | 0.38     | 100    | 0.04    | 0.05   | 0.43     | 97      | 0.05    | 0.05  | 0.38     | 96                  | 0.05    | 0.05  | 0.34     |       |      |
| ER+ Breast cancer         | 28  | 0.08    | 0.08  | 0.27     | 51                   | 0.003   | 0.05   | 0.96     | 60           | -0.01   | 0.05  | 0.79     | 70     | -0.02   | 0.05   | 0.75     | 71      | -0.01   | 0.05  | 0.83     | 69                  | -0.003  | 0.05  | 0.96     |       |      |
| ER- Breast cancer         | 8   | 0.02    | 0.07  | 0.74     | 20                   | -0.03   | 0.07   | 0.69     | 23           | 0.02    | 0.07  | 0.82     | 24     | 0.01    | 0.06   | 0.85     | 24      | 0.03    | 0.06  | 0.67     | 25                  | 0.05    | 0.07  | 0.41     |       |      |
| Endometrial cancer        | 2   | 0.14    | 0.09  | 0.11     | 5                    | -0.06   | 0.10   | 0.54     | 9            | 0.11    | 0.10  | 0.26     | 10     | 0.06    | 0.08   | 0.46     | 10      | 0.01    | 0.10  | 0.88     | 9.0                 | 0.10    | 0.10  | 0.35     |       |      |
| Prostate cancer           | 30  | 0.03    | 0.06  | 0.58     | 64                   | 0.001   | 0.04   | 0.98     | 70           | 0.001   | 0.05  | 0.98     | 82     | -0.01   | 0.04   | 0.75     | 81      | -0.01   | 0.05  | 0.82     | 82                  | -       | 0.05  | 1.00     |       |      |
|                           |     |         |       |          |                      |         |        |          |              |         |       |          |        |         |        |          |         |         |       |          | 0.0001              |         |       |          |       |      |
| Thyroid cancer            | 127 | -       | 0.001 | 0.002    | 196                  | -       | 0.0008 | 0.002    | 0.69         | 221     | -     | 0.0004   | 0.002  | -       | 0.0008 | 0.002    | 0.66    | 237     | -     | 0.0005   | 0.002               | 234     | -     | 0.0008   | 0.002 | 0.67 |
| Ovarian cancer            | 4   | 0.12    | 0.09  | 0.15     | 6                    | -0.12   | 0.10   | 0.21     | 7            | -0.008  | 0.09  | 0.93     | 9      | 0.10    | 0.10   | 0.29     | 9       | 0.07    | 0.12  | 0.57     | 7.0                 | 0.06    | 0.10  | 0.57     |       |      |
| Melanoma                  | 1   | -1.45   | 6.61  | 0.83     | 5                    | -0.82   | 6.02   | 0.89     | 6            | -0.34   | 7.46  | 0.96     | 6      | 1.41    | 8.29   | 0.87     | 6       | -2.84   | 9.51  | 0.77     | 6                   | -3.14   | 9.16  | 0.73     |       |      |
| Small bowel cancer        | -   | -       | -     | -        | 1                    | -7.99   | 39.57  | 0.84     | 4            | 66.15   | 45.54 | 0.15     | 4      | 35.28   | 49.53  | 0.48     | 5       | 86.50   | 45.10 | 0.06     | 4                   | 82.11   | 53.35 | 0.12     |       |      |
| Colorectal cancer         | 2   | -2.47   | 5.08  | 0.63     | 6                    | -2.37   | 4.70   | 0.61     | 6            | -5.71   | 5.51  | 0.30     | 7      | -2.40   | 5.31   | 0.65     | 7       | -0.25   | 4.91  | 0.96     | 6                   | -2.77   | 5.63  | 0.62     |       |      |
| Oropharyngeal cancer      | -   | -       | -     | -        | 1                    | -20.85  | 22.75  | 0.36     | 2            | -25.41  | 28.14 | 0.37     | 1      | 39.70   | 59.00  | 0.50     | 2       | -43.71  | 44.89 | 0.33     | 2                   | -53.00  | 44.49 | 0.23     |       |      |
| Lymphoma                  | -   | -       | -     | -        | -                    | -       | -      | -        | 1            | 4.78    | 16.51 | 0.77     | 1      | 18.00   | 20.95  | 0.39     | 1       | -7.31   | 28.07 | 0.79     | 1                   | 2.65    | 23.10 | 0.91     |       |      |
| Cervix cancer             | -   | -       | -     | -        | -                    | -       | -      | -        | 2            | -20.89  | 12.39 | 0.09     | 2      | -19.47  | 14.43  | 0.18     | 2       | -17.55  | 15.79 | 0.27     | 2                   | -24.41  | 15.57 | 0.12     |       |      |

**Table S4.** Causal effects of cancers on COVID-19 hospitalization estimated by multivariable Mendelian randomization.

| Variable adjustment       | BMI |         |        |          | Education attainment |         |        |                    | Intelligence |         |        |          | Income |         |        |          | Smoking |         |        |                    | Alcohol consumption |         |        |          |
|---------------------------|-----|---------|--------|----------|----------------------|---------|--------|--------------------|--------------|---------|--------|----------|--------|---------|--------|----------|---------|---------|--------|--------------------|---------------------|---------|--------|----------|
| Cancer                    | SNP | $\beta$ | SE     | <i>p</i> | SNP                  | $\beta$ | SE     | <i>p</i>           | SNP          | $\beta$ | SE     | <i>p</i> | SNP    | $\beta$ | SE     | <i>p</i> | SNP     | $\beta$ | SE     | <i>p</i>           | SNP                 | $\beta$ | SE     | <i>p</i> |
| Overall cancer            | -   | -       | -      | -        | 2                    | 4.01    | 1.63   | 0.01 <sup>#</sup>  | 4            | -2.63   | 1.98   | 0.18     | 4      | 2.85    | 2.62   | 0.28     | 4       | -1.93   | 2.32   | 0.41               | 4                   | 1.19    | 2.12   | 0.58     |
| Lung cancer               | 2   | 0.03    | 0.05   | 0.51     | 3                    | 0.04    | 0.04   | 0.32               | 4            | 0.05    | 0.05   | 0.31     | 4      | 0.03    | 0.05   | 0.51     | 4       | 0.006   | 0.07   | 0.93               | 3                   | 0.0005  | 0.07   | 0.99     |
| Squamous cell lung cancer | 1   | 0.02    | 0.04   | 0.67     | 1                    | -0.05   | 0.05   | 0.29               | 1            | 0.03    | 0.07   | 0.67     | 1      | -0.05   | 0.09   | 0.55     | 3       | -0.01   | 0.07   | 0.87               | 2                   | 0.04    | 0.07   | 0.52     |
| Breast cancer             | 37  | 0.02    | 0.05   | 0.61     | 72                   | -       | 0.04   | 1.00               | 86           | 0.01    | 0.04   | 0.76     | 99     | 0.01    | 0.04   | 0.74     | 97      | 0.001   | 0.04   | 0.78               | 96                  | 0.01    | 0.03   | 0.71     |
| ER+ Breast cancer         | 28  | 0.02    | 0.05   | 0.66     | 51                   | 0.007   | 0.03   | 0.85               | 59           | -0.03   | 0.04   | 0.33     | 69     | -0.02   | 0.04   | 0.63     | 70      | -0.02   | 0.03   | 0.46               | 68                  | -0.02   | 0.03   | 0.50     |
| ER- Breast cancer         | 8   | 0.02    | 0.05   | 0.70     | 19                   | -0.05   | 0.04   | 0.30               | 22           | -0.01   | 0.05   | 0.75     | 23     | 0.001   | 0.05   | 0.98     | 24      | -0.01   | 0.04   | 0.81               | 25                  | 0.005   | 0.04   | 0.91     |
| Endometrial cancer        | 2   | 0.02    | 0.06   | 0.77     | 5                    | -0.007  | 0.06   | 0.91               | 9            | 0.09    | 0.06   | 0.18     | 10     | 0.07    | 0.06   | 0.20     | 10      | 0.04    | 0.06   | 0.54               | 9                   | 0.07    | 0.06   | 0.24     |
| Prostate cancer           | 30  | 0.07    | 0.04   | 0.07     | 64                   | 0.05    | 0.03   | 0.046 <sup>#</sup> | 70           | 0.05    | 0.03   | 0.10     | 82     | 0.05    | 0.03   | 0.06     | 81      | 0.04    | 0.03   | 0.15               | 82                  | 0.05    | 0.03   | 0.11     |
| Thyroid cancer            | 127 | -       | 0.0009 | 0.53     | 195                  | -       | 0.0003 | 0.83               | 221          | -       | 0.0001 | 0.91     | 237    | -       | 0.0002 | 0.86     | 235     | -       | 0.0002 | 0.89               | 232                 | -       | 0.0002 | 0.86     |
| Ovarian cancer            | 4   | 0.07    | 0.06   | 0.24     | 6                    | -0.02   | 0.06   | 0.74               | 7            | -0.06   | 0.06   | 0.34     | 9      | 0.03    | 0.07   | 0.69     | 9       | 0.01    | 0.09   | 0.90               | 7                   | -0.007  | 0.01   | 0.89     |
| Melanoma                  | 1   | -0.22   | 4.55   | 0.96     | 5                    | -3.03   | 3.75   | 0.42               | 6            | -3.01   | 4.52   | 0.51     | 6      | -0.22   | 6.02   | 0.97     | 6       | -2.77   | 5.26   | 0.60               | 6                   | -2.51   | 4.71   | 0.59     |
| Small bowel cancer        | -   | -       | -      | -        | -                    | -       | -      | -                  | 1            | 45.31   | 37.55  | 0.23     | 2      | 56.63   | 52.13  | 0.28     | 2       | 89.14   | 44.82  | 0.047 <sup>#</sup> | 1                   | 35.74   | 45.77  | 0.43     |
| Colorectal cancer         | 2   | -2.11   | 3.50   | 0.55     | 6                    | 0.21    | 3.15   | 0.95               | 6            | 1.06    | 3.66   | 0.77     | 7      | 1.51    | 4.64   | 0.74     | 7       | 1.27    | 3.52   | 0.72               | 6                   | -0.18   | 3.45   | 0.96     |
| Oropharyngeal cancer      | -   | -       | -      | -        | -                    | -       | -      | -                  | -            | -       | -      | -        | -      | -       | -      | -        | -       | -       | -      | -                  | -                   | -       | -      |          |
| Lymphoma                  | -   | -       | -      | -        | -                    | -       | -      | -                  | -            | -       | -      | -        | -      | -       | -      | -        | -       | -       | -      | -                  | -                   | -       | -      |          |
| Cervix cancer             | -   | -       | -      | -        | -                    | -       | -      | -                  | 2            | -12.42  | 8.17   | 0.13     | 2      | -10.65  | 12.96  | 0.41     | 2       | -16.78  | 11.00  | 0.13               | 2                   | -14.75  | 10.41  | 0.16     |

<sup>#</sup> Potential association ( $p < 0.05$ ).

**Table S5.** Causal effects of cancers on COVID-19 susceptibility estimated by multivariable Mendelian randomization.

| Variable adjustment       | BMI |         |        |          | Education attainment |         |        |          | Intelligence |         |        |          | Income |         |        |          | Smoking |         |        |          | Alcohol consumption |         |        |          |
|---------------------------|-----|---------|--------|----------|----------------------|---------|--------|----------|--------------|---------|--------|----------|--------|---------|--------|----------|---------|---------|--------|----------|---------------------|---------|--------|----------|
| Cancer                    | SNP | $\beta$ | SE     | <i>p</i> | SNP                  | $\beta$ | SE     | <i>p</i> | SNP          | $\beta$ | SE     | <i>p</i> | SNP    | $\beta$ | SE     | <i>p</i> | SNP     | $\beta$ | SE     | <i>p</i> | SNP                 | $\beta$ | SE     | <i>p</i> |
| Overall cancer            | -   | -       | -      | -        | 2                    | 0.65    | 0.80   | 0.41     | 4            | 0.23    | 1.06   | 0.83     | 4      | 0.87    | 1.17   | 0.46     | 4       | 0.43    | 1.14   | 0.71     | 4                   | 0.26    | 1.15   | 0.82     |
| Lung cancer               | 2   | -0.004  | 0.02   | 0.87     | 4                    | 0.01    | 0.02   | 0.49     | 5            | 0.006   | 0.02   | 0.79     | 5      | 0.004   | 0.02   | 0.85     | 5       | -0.003  | 0.03   | 0.92     | 4                   | -0.002  | 0.03   | 0.94     |
| Squamous cell lung cancer | 1   | 0.001   | 0.02   | 0.96     | 1                    | -0.007  | 0.02   | 0.75     | 1            | 0.03    | 0.10   | 0.75     | 1      | -0.002  | 0.04   | 0.97     | 3       | -0.03   | 0.04   | 0.41     | 2                   | -0.002  | 0.04   | 0.97     |
| Breast cancer             | 37  | 0.001   | 0.02   | 0.96     | 73                   | -0.01   | 0.02   | 0.57     | 87           | -0.01   | 0.02   | 0.51     | 100    | -0.01   | 0.02   | 0.53     | 97      | -0.01   | 0.02   | 0.48     | 96                  | -0.008  | 0.02   | 0.65     |
| ER+ Breast cancer         | 28  | -0.02   | 0.02   | 0.50     | 51                   | -0.02   | 0.02   | 0.25     | 60           | -0.03   | 0.02   | 0.20     | 70     | -0.02   | 0.02   | 0.23     | 71      | -0.03   | 0.02   | 0.15     | 69                  | -0.02   | 0.02   | 0.29     |
| ER- Breast cancer         | 8   | 0.003   | 0.02   | 0.91     | 20                   | -0.03   | 0.02   | 0.15     | 23           | -0.04   | 0.03   | 0.15     | 24     | -0.03   | 0.02   | 0.27     | 24      | -0.02   | 0.02   | 0.31     | 25                  | -0.02   | 0.02   | 0.30     |
| Endometrial cancer        | 2.0 | 0.008   | 0.03   | 0.78     | 5                    | -0.03   | 0.03   | 0.35     | 9.0          | -0.01   | 0.03   | 0.76     | 10     | 0.01    | 0.03   | 0.61     | 10      | 0.001   | 0.02   | 0.97     | 9                   | -0.004  | 0.03   | 0.89     |
| Prostate cancer           | 30  | 0.009   | 0.02   | 0.66     | 64                   | -0.008  | 0.01   | 0.56     | 70           | -0.005  | 0.02   | 0.76     | 82     | -0.004  | 0.01   | 0.76     | 81      | -0.005  | 0.02   | 0.75     | 82                  | -0.002  | 0.02   | 0.88     |
| Thyroid cancer            | 127 | 0.0002  | 0.0007 | 0.78     | 196                  | 0.0008  | 0.0006 | 0.17     | 221          | 0.0007  | 0.0006 | 0.27     | 239    | 0.0007  | 0.0006 | 0.28     | 237     | 0.0006  | 0.0006 | 0.29     | 234                 | 0.0006  | 0.0006 | 0.31     |
| Ovarian cancer            | 4   | 0.03    | 0.03   | 0.31     | 6                    | -0.03   | 0.03   | 0.30     | 7            | -0.06   | 0.03   | 0.07     | 9      | 0.002   | 0.05   | 0.97     | 9       | -0.005  | 0.06   | 0.93     | 7                   | -0.03   | 0.03   | 0.32     |
| Melanoma                  | 1   | -1.50   | 2.13   | 0.48     | 5                    | -0.60   | 1.83   | 0.74     | 6            | -0.44   | 2.34   | 0.85     | 6      | 0.96    | 2.62   | 0.71     | 6       | 0.74    | 2.57   | 0.77     | 6                   | 0.60    | 2.49   | 0.81     |
| Small bowel cancer        | -   | -       | -      | -        | -                    | -       | -      | -        | 3            | 28.72   | 17.06  | 0.09     | 3      | 10.12   | 20.33  | 0.62     | 4       | 19.39   | 17.35  | 0.26     | 3                   | 19.35   | 18.90  | 0.31     |
| Colorectal cancer         | 2   | -1.89   | 1.65   | 0.25     | 6                    | 0.48    | 1.62   | 0.77     | 6            | -0.14   | 2.00   | 0.95     | 7      | 1.52    | 2.19   | 0.49     | 7       | 2.16    | 1.95   | 0.27     | 6                   | 0.87    | 2.10   | 0.68     |
| Oropharyngeal cancer      | -   | -       | -      | -        | 1                    | -5.96   | 7.23   | 0.41     | 2            | 2.19    | 9.46   | 0.82     | 1      | -0.44   | 20.13  | 0.98     | 2       | -16.91  | 11.45  | 0.14     | 2                   | -16.08  | 11.73  | 0.17     |
| Lymphoma                  | -   | -       | -      | -        | -                    | -       | -      | -        | 1            | -0.73   | 5.52   | 0.89     | 1      | 2.65    | 7.52   | 0.72     | 1       | -1.74   | 7.66   | 0.82     | 1                   | -3.18   | 6.22   | 0.61     |
| Cervix cancer             | -   | -       | -      | -        | -                    | -       | -      | -        | 2            | -7.01   | 4.47   | 0.12     | 2      | -4.12   | 6.26   | 0.51     | 2       | -5.18   | 6.35   | 0.41     | 2                   | -5.55   | 6.04   | 0.36     |

**Table S6.** Verification of the causal effects of cancers on COVID-19 outcomes.

| Cancer                     | GWAS ID                        | Year | Cases  | Controls | COVID-19 severity |         |       |          | COVID-19 hospitalization |         |       |          | COVID-19 susceptibility |         |       |          |
|----------------------------|--------------------------------|------|--------|----------|-------------------|---------|-------|----------|--------------------------|---------|-------|----------|-------------------------|---------|-------|----------|
|                            |                                |      |        |          | SNP               | $\beta$ | SE    | <i>p</i> | SNP                      | $\beta$ | SE    | <i>p</i> | SNP                     | $\beta$ | SE    | <i>p</i> |
| Lung cancer                | ukb-a-54                       | 2017 | 190    | 336,969  | 5                 | 42.50   | 27.67 | 0.12     | 3                        | 54.83   | 34.50 | 0.11     | 3                       | 40.48   | 26.25 | 0.12     |
| Breast cancer              | ukb-b-16890                    | 2018 | 10,303 | 452,630  | 15                | 1.09    | 3.64  | 0.76     | 15                       | 0.21    | 1.72  | 0.90     | 15                      | -0.27   | 1.13  | 0.81     |
| Ovarian cancer             | ieu-b-4963                     | 2021 | 1218   | 198,523  | -                 | -       | -     | -        | -                        | -       | -     | -        | -                       | -       | -     | -        |
| Endometrial cancer         | ukb-b-13545                    | 2018 | 1151   | 461,782  | -                 | -       | -     | -        | -                        |         |       | -        | -                       | -       | -     | -        |
| Prostate cancer            | ieu-b-4809                     | 2021 | 9132   | 173,493  | 27                | -0.51   | 0.90  | 0.57     | 27                       | 0.37    | 0.59  | 0.53     | 27                      | -0.20   | 0.31  | 0.52     |
| Thyroid malignant neoplasm | finn-b-C3_THYROID_GLAND        | 2021 | 989    | 217,803  | 3                 | 0.02    | 0.05  | 0.71     | 3                        | -0.03   | 0.03  | 0.34     | 3                       | 0.01    | 0.02  | 0.45     |
| Situ melanoma              | finn-b-CD2_INSITU_MELANOMA     | 2021 | 393    | 218,399  | -                 | -       | -     | -        | -                        | -       | -     | -        | -                       | -       | -     | -        |
| Colorectal cancer          | finn-b-C3_COLORECTAL           | 2021 | 3022   | 215,770  | -                 | -       | -     | -        | -                        |         |       | -        | -                       | -       | -     | -        |
| Oropharyngeal cancer       | ieu-b-96                       | 2016 | 1090   | 2928     | -                 | -       | -     | -        | -                        | -       | -     | -        | -                       | -       | -     | -        |
| non-Hodgkin lymphoma       | finn-b-CD2_NONHODGKIN_NAS      | 2021 | 533    | 218,259  | -                 | -       | -     | -        | -                        | -       | -     | -        | -                       | -       | -     | -        |
| Cervix situ carcinoma      | finn-b-CD2_INSITU_CERVIX_UTERI | 2021 | 298    | 123,281  | -                 | -       | -     | -        | -                        |         |       | -        | -                       | -       | -     | -        |
