# Supplementary material for: Cancers and COVID-19 Risk: A Mendelian Randomization Study
Source: Cancers (Basel). 2022 Apr 22;14(9):2086. doi: 10.3390/cancers14092086 (PMC9099868; doi:10.3390/cancers14092086)
Supplement: Supplementary file 1 [file cancers-14-02086-s001.zip › Table S2.xls]

## Sheet: Table description
Table S2A: Selected SNPs of included cancers on COVID-19 severity
Table S2B: Selected SNPs of included cancers on COVID-19 hospitalization
Table S2C: Selected SNPs of included cancers on COVID-19 susceptibility

## Sheet: Table S2A
exposure	id.exposure	SNP	chr.exposure	pos.exposure	effect_allele.exposure	other_allele.exposure	eaf.exposure	beta.exposure	se.exposure	pval.exposure	samplesize.exposure	outcome	effect_allele.outcome	other_allele.outcome	eaf.outcome	beta.outcome	se.outcome	pval.outcome	samplesize.outcome	F	R2
Overall cancer	ukb-a-307	rs1126809	11	89017961	A	G	0.304801	0.0042007	0.000714901	4.20911e-09	336272	COVID-19 severity	A	G	0.2544	-0.059886	0.030222	0.04753	1388342	34.5264	0.000103
Overall cancer	ukb-a-307	rs2981575	10	123346116	A	G	0.60559	-0.00463491	0.000672203	5.39138e-12	336272	COVID-19 severity	A	G	0.5937	0.0020479	0.034033	0.952	1388342	47.5425	0.000141
Overall cancer	ukb-a-307	rs3769823	2	202122995	G	A	0.718859	-0.00442606	0.000730123	1.34527e-09	336272	COVID-19 severity	G	A	0.692	-0.018242	0.028359	0.5201	1388342	36.7487	0.000109
Overall cancer	ukb-a-307	rs8051733	16	90024206	G	A	0.347009	0.00458229	0.000691248	3.38454e-11	336272	COVID-19 severity	G	A	0.3088	-0.025473	0.038058	0.5033	1388342	43.9438	0.000131
Lung cancer	ieu-a-966	rs11571818	13	32968810	C	T	0.0113361	0.660847	0.16686	2.63027e-12	27209	COVID-19 severity	C	T	0.009085	-0.18324	0.19875	0.3565	1388342	15.6855	0.000576
Lung cancer	ieu-a-966	rs37004	5	1356684	T	C	0.226187	-0.17209	0.019417	3.19007e-13	27209	COVID-19 severity	T	C	0.2304	0.020575	0.032034	0.5207	1388342	78.5501	0.002879
Lung cancer	ieu-a-966	rs446975	3	9217383	T	G	0.115137	-0.261532	0.022649	6.41948e-18	27209	COVID-19 severity	T	G	0.1292	-0.041915	0.040603	0.3019	1388342	133.337	0.004877
Lung cancer	ieu-a-966	rs501942	6	31840477	T	C	0.108859	0.186841	0.034137	1.47001e-10	27209	COVID-19 severity	T	C	0.1115	-0.026377	0.046408	0.5698	1388342	29.9567	0.0011
Lung cancer	ieu-a-966	rs8040868	15	78911181	C	T	0.424371	0.301974	0.024535	4.9705e-60	27209	COVID-19 severity	C	T	0.3897	0.023946	0.026977	0.3747	1388342	151.484	0.005537
Breast cancer	ieu-a-1126	rs10022462	4	89243818	T	C	0.4379	0.0375	0.0062	1.55e-09	228951	COVID-19 severity	T	C	0.434	-0.020019	0.026747	0.4542	1388342	36.583	0.00016
Breast cancer	ieu-a-1126	rs10096351	8	128372172	G	A	0.5441	0.1055	0.0062	1.97e-64	228951	COVID-19 severity	G	A	0.5488	-0.0085509	0.026556	0.7475	1388342	289.549	0.001263
Breast cancer	ieu-a-1126	rs10760444	9	129396434	A	G	0.5667	-0.0358	0.0062	9.06e-09	228951	COVID-19 severity	A	G	0.5494	0.042788	0.033627	0.2032	1388342	33.3413	0.000146
Breast cancer	ieu-a-1126	rs10885405	10	114777670	T	C	0.46	0.0465	0.0062	5.44e-14	228951	COVID-19 severity	T	C	0.4538	-0.032206	0.02654	0.2249	1388342	56.25	0.000246
Breast cancer	ieu-a-1126	rs10941679	5	44706498	G	A	0.2522	0.1278	0.0071	5.61e-73	228951	COVID-19 severity	G	A	0.2571	-0.023912	0.039068	0.5405	1388342	324	0.001413
Breast cancer	ieu-a-1126	rs10995201	10	64299890	G	A	0.1591	-0.1317	0.0087	1.56e-51	228951	COVID-19 severity	G	A	0.1494	-0.0051719	0.048446	0.915	1388342	229.157	0.001
Breast cancer	ieu-a-1126	rs11117758	1	217220574	A	G	0.2086	-0.0449	0.0076	3.9e-09	228951	COVID-19 severity	A	G	0.1972	0.00093561	0.040502	0.9816	1388342	34.9032	0.000152
Breast cancer	ieu-a-1126	rs11205303	1	149906413	C	T	0.3998	0.0497	0.0064	1.14e-14	228951	COVID-19 severity	C	T	0.3799	0.044415	0.027476	0.106	1388342	60.3049	0.000263
Breast cancer	ieu-a-1126	rs1121948	8	129165056	G	A	0.1963	0.0575	0.0077	7.48e-14	228951	COVID-19 severity	G	A	0.1888	0.003293	0.031726	0.9173	1388342	55.764	0.000244
Breast cancer	ieu-a-1126	rs11462858	10	123093991	GT	G	0.3215	-0.0471	0.0067	2.09e-12	228951	COVID-19 severity	GT	G	0.3408	-0.0035344	0.037093	0.9241	1388342	49.4188	0.000216
Breast cancer	ieu-a-1126	rs11571833	13	32972626	T	A	0.0081	0.2727	0.0346	3.1e-15	228951	COVID-19 severity	T	A	0.008963	-0.22282	0.19884	0.2625	1388342	62.1181	0.000271
Breast cancer	ieu-a-1126	rs11583393	1	88429024	A	C	0.249	-0.0396	0.0072	3.61e-08	228951	COVID-19 severity	A	C	0.2628	-0.059868	0.031895	0.06052	1388342	30.25	0.000132
Breast cancer	ieu-a-1126	rs11624333	14	68979835	C	T	0.2595	-0.0968	0.0071	6.5e-42	228951	COVID-19 severity	C	T	0.2656	-0.072772	0.039391	0.06468	1388342	185.881	0.000811
Breast cancer	ieu-a-1126	rs11672660	19	46180184	T	C	0.213	0.0472	0.008	4.13e-09	228951	COVID-19 severity	T	C	0.2182	0.024125	0.033595	0.4727	1388342	34.81	0.000152
Breast cancer	ieu-a-1126	rs11684853	2	19310918	T	G	0.5606	-0.0442	0.0062	1.12e-12	228951	COVID-19 severity	T	G	0.5585	0.0037475	0.026715	0.8884	1388342	50.8231	0.000222
Breast cancer	ieu-a-1126	rs117618124	18	29977689	C	T	0.0453	-0.1074	0.0156	5.46e-12	228951	COVID-19 severity	C	T	0.0558	-0.11007	0.071664	0.1246	1388342	47.3979	0.000207
Breast cancer	ieu-a-1126	rs117737783	11	69079744	A	G	0.0728	0.0747	0.0127	4.03e-09	228951	COVID-19 severity	A	G	0.07189	0.020926	0.07158	0.77	1388342	34.5966	0.000151
Breast cancer	ieu-a-1126	rs11822830	11	129461016	G	A	0.5959	0.0483	0.0063	1.98e-14	228951	COVID-19 severity	G	A	0.5745	-0.0087237	0.027064	0.7472	1388342	58.7778	0.000257
Breast cancer	ieu-a-1126	rs11903787	2	121088182	A	G	0.2405	-0.0451	0.0076	2.36e-09	228951	COVID-19 severity	A	G	0.2324	0.020371	0.041057	0.6198	1388342	35.2149	0.000154
Breast cancer	ieu-a-1126	rs11977670	7	139942304	A	G	0.4315	0.0522	0.0063	1.05e-16	228951	COVID-19 severity	A	G	0.4083	-0.021326	0.026676	0.424	1388342	68.6531	0.0003
Breast cancer	ieu-a-1126	rs12207986	6	81094287	A	G	0.5362	0.0375	0.0062	1.45e-09	228951	COVID-19 severity	A	G	0.5339	-0.0047568	0.026739	0.8588	1388342	36.583	0.00016
Breast cancer	ieu-a-1126	rs12250948	10	115128491	C	T	0.7844	-0.0576	0.0074	1.04e-14	228951	COVID-19 severity	C	T	0.7718	0.077237	0.039287	0.0493	1388342	60.5873	0.000265
Breast cancer	ieu-a-1126	rs1230666	1	114173410	G	A	0.8721	-0.0592	0.0095	3.87e-10	228951	COVID-19 severity	G	A	0.8459	-0.045659	0.052726	0.3865	1388342	38.8326	0.00017
Breast cancer	ieu-a-1126	rs12479355	2	227226952	G	A	0.2088	-0.0426	0.0076	2.36e-08	228951	COVID-19 severity	G	A	0.1951	-0.0075286	0.031992	0.814	1388342	31.419	0.000137
Breast cancer	ieu-a-1126	rs12487185	3	30677269	G	A	0.3128	0.045	0.0066	1.21e-11	228951	COVID-19 severity	G	A	0.3256	-0.041775	0.029109	0.1513	1388342	46.4876	0.000203
Breast cancer	ieu-a-1126	rs12513872	5	1248354	A	G	0.7485	0.0413	0.0073	1.46e-08	228951	COVID-19 severity	A	G	0.7428	-0.052876	0.039279	0.1782	1388342	32.0077	0.00014
Breast cancer	ieu-a-1126	rs12519859	5	32581186	A	G	0.4748	0.0365	0.0063	5.77e-09	228951	COVID-19 severity	A	G	0.4643	-0.019372	0.026512	0.465	1388342	33.5664	0.000147
Breast cancer	ieu-a-1126	rs12546444	8	106358620	T	A	0.1001	-0.0717	0.011	7.45e-11	228951	COVID-19 severity	T	A	0.09902	-0.013589	0.057698	0.8138	1388342	42.4867	0.000186
Breast cancer	ieu-a-1126	rs1268974	10	80852378	G	A	0.6132	-0.0793	0.0063	3.71e-36	228951	COVID-19 severity	G	A	0.6189	-0.042917	0.034457	0.2129	1388342	158.44	0.000692
Breast cancer	ieu-a-1126	rs12990503	2	218294217	G	C	0.7372	-0.073	0.007	9.99e-26	228951	COVID-19 severity	G	C	0.7215	-0.037203	0.029745	0.211	1388342	108.755	0.000475
Breast cancer	ieu-a-1126	rs13066793	3	87037543	G	A	0.0925	-0.0685	0.0112	1.04e-09	228951	COVID-19 severity	G	A	0.08691	-0.015706	0.048513	0.7461	1388342	37.4063	0.000163
Breast cancer	ieu-a-1126	rs13267382	8	117209548	G	A	0.6493	-0.0437	0.0065	1.6e-11	228951	COVID-19 severity	G	A	0.6276	-0.016084	0.034641	0.6424	1388342	45.1998	0.000197
Breast cancer	ieu-a-1126	rs1498608	5	58343067	A	T	0.0949	-0.0671	0.0107	3.48e-10	228951	COVID-19 severity	A	T	0.08416	-0.040914	0.045249	0.3659	1388342	39.3258	0.000172
Breast cancer	ieu-a-1126	rs1685191	19	44283232	T	C	0.5647	-0.0586	0.0064	3.87e-20	228951	COVID-19 severity	T	C	0.5499	-0.024785	0.035581	0.4861	1388342	83.8369	0.000366
Breast cancer	ieu-a-1126	rs16991615	20	5948227	A	G	0.0626	0.0758	0.0126	1.92e-09	228951	COVID-19 severity	A	G	0.05015	0.10547	0.053382	0.04817	1388342	36.1907	0.000158
Breast cancer	ieu-a-1126	rs17185310	1	118195592	A	G	0.3034	0.0395	0.0069	8.7e-09	228951	COVID-19 severity	A	G	0.3057	0.025958	0.037695	0.4911	1388342	32.7715	0.000143
Breast cancer	ieu-a-1126	rs17268829	7	94113799	C	T	0.2804	0.0495	0.0068	4.49e-13	228951	COVID-19 severity	C	T	0.2626	-0.0088962	0.029437	0.7625	1388342	52.9898	0.000231
Breast cancer	ieu-a-1126	rs17426269	1	88156923	A	G	0.1488	0.0487	0.0086	1.74e-08	228951	COVID-19 severity	A	G	0.1341	0.060824	0.046148	0.1875	1388342	32.0672	0.00014
Breast cancer	ieu-a-1126	rs1973765	11	1898664	C	T	0.4001	-0.0817	0.0064	9.71e-38	228951	COVID-19 severity	C	T	0.398	0.022546	0.034451	0.5128	1388342	162.961	0.000711
Breast cancer	ieu-a-1126	rs1985742	9	21961227	T	A	0.3516	0.0588	0.0065	8.1e-20	228951	COVID-19 severity	T	A	0.35	0.042565	0.034858	0.222	1388342	81.8329	0.000357
Breast cancer	ieu-a-1126	rs2016394	2	172972971	A	G	0.4748	-0.0425	0.0062	6.23e-12	228951	COVID-19 severity	A	G	0.4816	0.020225	0.035399	0.5678	1388342	46.9888	0.000205
Breast cancer	ieu-a-1126	rs2253012	14	37228504	T	C	0.4318	0.0433	0.0065	3.13e-11	228951	COVID-19 severity	T	C	0.4238	-0.0050779	0.03444	0.8828	1388342	44.3761	0.000194
Breast cancer	ieu-a-1126	rs2747652	6	152437016	C	T	0.5263	0.0663	0.0062	1.31e-26	228951	COVID-19 severity	C	T	0.5709	-0.0085489	0.026537	0.7473	1388342	114.352	0.000499
Breast cancer	ieu-a-1126	rs28512361	22	46283297	A	G	0.1127	0.0611	0.0109	2.25e-08	228951	COVID-19 severity	A	G	0.1089	-0.050779	0.059012	0.3895	1388342	31.4217	0.000137
Breast cancer	ieu-a-1126	rs2853669	5	1295349	G	A	0.3061	-0.0651	0.0069	4.05e-21	228951	COVID-19 severity	G	A	0.2853	0.031281	0.028425	0.2711	1388342	89.0151	0.000389
Breast cancer	ieu-a-1126	rs2992756	1	18807339	C	T	0.5194	-0.0506	0.0063	1.6e-15	228951	COVID-19 severity	C	T	0.5183	-0.043068	0.026477	0.1038	1388342	64.5089	0.000282
Breast cancer	ieu-a-1126	rs34195518	10	9084428	CT	C	0.1207	0.0611	0.0096	2.01e-10	228951	COVID-19 severity	CT	C	0.1128	0.019301	0.05012	0.7002	1388342	40.5079	0.000177
Breast cancer	ieu-a-1126	rs35383942	1	201437832	T	C	0.0562	0.101	0.0139	3.79e-13	228951	COVID-19 severity	T	C	0.08016	-0.053918	0.074563	0.4696	1388342	52.7975	0.000231
Breast cancer	ieu-a-1126	rs35961416	8	128213561	CA	C	0.4117	-0.0417	0.0066	2.71e-10	228951	COVID-19 severity	CA	C	0.4111	-0.016884	0.037662	0.6539	1388342	39.9194	0.000174
Breast cancer	ieu-a-1126	rs3769821	2	202123430	T	C	0.6683	-0.0565	0.0065	3.97e-18	228951	COVID-19 severity	T	C	0.6582	-0.016925	0.027551	0.539	1388342	75.5562	0.00033
Breast cancer	ieu-a-1126	rs3821902	3	63941697	G	T	0.1358	0.0623	0.0089	2.99e-12	228951	COVID-19 severity	G	T	0.116	0.032744	0.03747	0.3822	1388342	49	0.000214
Breast cancer	ieu-a-1126	rs3903072	11	65583066	T	G	0.4727	-0.0434	0.0062	2.25e-12	228951	COVID-19 severity	T	G	0.478	-0.0083752	0.026417	0.7512	1388342	49	0.000214
Breast cancer	ieu-a-1126	rs4081859	5	81466669	A	G	0.7517	0.0521	0.0073	7.08e-13	228951	COVID-19 severity	A	G	0.762	-0.03774	0.030732	0.2194	1388342	50.9366	0.000222
Breast cancer	ieu-a-1126	rs4233486	1	41380440	T	C	0.6514	0.0396	0.0069	9.09e-09	228951	COVID-19 severity	T	C	0.6681	0.020065	0.034902	0.5654	1388342	32.9376	0.000144
Breast cancer	ieu-a-1126	rs4286946	8	36849946	G	C	0.1739	-0.0799	0.0083	8.63e-22	228951	COVID-19 severity	G	C	0.1619	-0.052685	0.033897	0.1201	1388342	92.6696	0.000405
Breast cancer	ieu-a-1126	rs4442975	2	217920769	T	G	0.5021	-0.1274	0.0061	1.14e-95	228951	COVID-19 severity	T	G	0.493	0.05738	0.033673	0.08838	1388342	436.193	0.001902
Breast cancer	ieu-a-1126	rs4496150	16	87085237	A	C	0.2466	-0.0416	0.0072	8.09e-09	228951	COVID-19 severity	A	C	0.245	-0.040998	0.036827	0.2656	1388342	33.3827	0.000146
Breast cancer	ieu-a-1126	rs4562056	5	169591487	T	G	0.3323	0.0416	0.0067	4.72e-10	228951	COVID-19 severity	T	G	0.3213	-0.01509	0.027713	0.5861	1388342	38.5511	0.000168
Breast cancer	ieu-a-1126	rs4702131	5	16233619	C	T	0.5612	-0.0424	0.0062	1e-11	228951	COVID-19 severity	C	T	0.5706	-0.0038629	0.034214	0.9101	1388342	46.768	0.000204
Breast cancer	ieu-a-1126	rs4784227	16	52599188	T	C	0.2387	0.2153	0.0071	1e-200	228951	COVID-19 severity	T	C	0.2439	0.032602	0.030444	0.2842	1388342	919.542	0.004
Breast cancer	ieu-a-1126	rs4820318	22	38570313	A	G	0.3753	-0.0475	0.0064	1.03e-13	228951	COVID-19 severity	A	G	0.3729	-0.01537	0.027019	0.5694	1388342	55.0842	0.000241
Breast cancer	ieu-a-1126	rs4848599	2	121239360	C	T	0.8845	0.0933	0.01	1.58e-20	228951	COVID-19 severity	C	T	0.8905	-0.011367	0.054121	0.8336	1388342	87.0489	0.00038
Breast cancer	ieu-a-1126	rs4971059	1	155148781	A	G	0.3632	0.0424	0.0064	4.83e-11	228951	COVID-19 severity	A	G	0.3934	0.015662	0.036406	0.667	1388342	43.8906	0.000192
Breast cancer	ieu-a-1126	rs527616	18	24337424	G	C	0.6211	0.0499	0.0064	6.7e-15	228951	COVID-19 severity	G	C	0.6015	-0.019533	0.037274	0.6003	1388342	60.7913	0.000265
Breast cancer	ieu-a-1126	rs56387622	3	46888198	C	T	0.1012	-0.0942	0.0106	5.47e-19	228951	COVID-19 severity	C	T	0.09783	-0.0082961	0.04185	0.8429	1388342	78.9751	0.000345
Breast cancer	ieu-a-1126	rs56891541	5	56240748	TCC	T	0.2467	0.0535	0.0072	8.99e-14	228951	COVID-19 severity	TCC	T	0.2501	-0.040885	0.038686	0.2906	1388342	55.2132	0.000241
Breast cancer	ieu-a-1126	rs56971155	16	53862888	T	C	0.3934	-0.0424	0.0064	3.63e-11	228951	COVID-19 severity	T	C	0.3471	-0.009821	0.034293	0.7746	1388342	43.8906	0.000192
Breast cancer	ieu-a-1126	rs57212245	11	69280923	A	G	0.0783	-0.0652	0.0119	4.09e-08	228951	COVID-19 severity	A	G	0.07832	-0.016933	0.068974	0.8061	1388342	30.0193	0.000131
Breast cancer	ieu-a-1126	rs58058861	3	172285237	A	G	0.2172	0.0474	0.0074	1.91e-10	228951	COVID-19 severity	A	G	0.2368	-0.0078398	0.032386	0.8087	1388342	41.0292	0.000179
Breast cancer	ieu-a-1126	rs5995875	22	40960692	T	C	0.1068	0.1206	0.0098	9.04e-35	228951	COVID-19 severity	T	C	0.1111	0.11622	0.044561	0.009102	1388342	151.441	0.000661
Breast cancer	ieu-a-1126	rs5997389	22	29134719	A	G	0.0903	0.0791	0.0108	2.19e-13	228951	COVID-19 severity	A	G	0.1074	-0.105	0.051999	0.04346	1388342	53.6421	0.000234
Breast cancer	ieu-a-1126	rs6122906	20	48945911	G	A	0.1816	0.0507	0.008	2.45e-10	228951	COVID-19 severity	G	A	0.1939	-0.069213	0.045893	0.1315	1388342	40.1639	0.000175
Breast cancer	ieu-a-1126	rs62048402	16	53803223	A	G	0.4156	-0.0624	0.0063	3.5e-23	228951	COVID-19 severity	A	G	0.4111	-0.019617	0.026865	0.4653	1388342	98.1043	0.000428
Breast cancer	ieu-a-1126	rs62331150	4	106069013	T	G	0.2263	0.0494	0.0074	1.85e-11	228951	COVID-19 severity	T	G	0.2083	-0.10148	0.041784	0.01515	1388342	44.5646	0.000195
Breast cancer	ieu-a-1126	rs62355901	5	56053535	C	T	0.1602	0.1734	0.0082	3.42e-98	228951	COVID-19 severity	C	T	0.154	0.007509	0.045247	0.8682	1388342	447.168	0.001949
Breast cancer	ieu-a-1126	rs630965	9	110885479	T	C	0.6196	0.0992	0.0064	3.21e-54	228951	COVID-19 severity	T	C	0.6328	0.018827	0.027265	0.4899	1388342	240.25	0.001048
Breast cancer	ieu-a-1126	rs6472903	8	76230301	T	G	0.8261	0.0778	0.0083	4.43e-21	228951	COVID-19 severity	T	G	0.8141	0.020646	0.035858	0.5648	1388342	87.8624	0.000384
Breast cancer	ieu-a-1126	rs6562760	13	73957681	G	A	0.766	0.0443	0.0073	1.49e-09	228951	COVID-19 severity	G	A	0.7848	-0.028805	0.030534	0.3455	1388342	36.8266	0.000161
Breast cancer	ieu-a-1126	rs6569648	6	130349119	T	C	0.7643	0.0512	0.0073	2.98e-12	228951	COVID-19 severity	T	C	0.7702	-0.0065944	0.03105	0.8318	1388342	49.192	0.000215
Breast cancer	ieu-a-1126	rs6596100	5	132407058	T	C	0.2427	-0.0439	0.0076	7.74e-09	228951	COVID-19 severity	T	C	0.2476	0.0066623	0.031984	0.835	1388342	33.3658	0.000146
Breast cancer	ieu-a-1126	rs6597981	11	803017	G	A	0.5178	0.0439	0.0062	1.35e-12	228951	COVID-19 severity	G	A	0.5416	0.019778	0.033833	0.5588	1388342	50.1355	0.000219
Breast cancer	ieu-a-1126	rs66572733	10	22047015	G	C	0.037	0.095	0.0162	4.74e-09	228951	COVID-19 severity	G	C	0.03355	0.092387	0.065786	0.1602	1388342	34.3888	0.00015
Breast cancer	ieu-a-1126	rs6725517	2	25129473	G	A	0.4088	-0.0468	0.0067	2.93e-12	228951	COVID-19 severity	G	A	0.4134	-0.050594	0.026694	0.05805	1388342	48.7913	0.000213
Breast cancer	ieu-a-1126	rs6787391	3	4728574	T	C	0.3807	0.0567	0.0064	9.07e-19	228951	COVID-19 severity	T	C	0.3923	-0.016777	0.036991	0.6501	1388342	78.4885	0.000343
Breast cancer	ieu-a-1126	rs68056147	7	130674481	A	G	0.299	0.0501	0.0069	5.36e-13	228951	COVID-19 severity	A	G	0.2809	0.061388	0.03755	0.1021	1388342	52.7202	0.00023
Breast cancer	ieu-a-1126	rs6815814	4	38816338	C	A	0.2525	0.052	0.0072	6.13e-13	228951	COVID-19 severity	C	A	0.1939	0.032738	0.036788	0.3735	1388342	52.1605	0.000228
Breast cancer	ieu-a-1126	rs6882649	5	111217786	T	G	0.6651	0.0388	0.0066	3.67e-09	228951	COVID-19 severity	T	G	0.6526	-0.047149	0.036707	0.199	1388342	34.5601	0.000151
Breast cancer	ieu-a-1126	rs7072776	10	22032942	G	A	0.7124	-0.0618	0.0068	1.75e-19	228951	COVID-19 severity	G	A	0.7324	-0.01127	0.028439	0.6919	1388342	82.596	0.000361
Breast cancer	ieu-a-1126	rs7149262	14	37136545	A	C	0.2113	-0.0724	0.0076	2.47e-21	228951	COVID-19 severity	A	C	0.2001	0.02534	0.032769	0.4394	1388342	90.7507	0.000396
Breast cancer	ieu-a-1126	rs7223535	17	29211667	A	G	0.268	-0.0439	0.007	3.53e-10	228951	COVID-19 severity	A	G	0.2752	0.00093347	0.029651	0.9749	1388342	39.3308	0.000172
Breast cancer	ieu-a-1126	rs7258465	19	18533642	C	T	0.3436	-0.0725	0.0066	2.79e-28	228951	COVID-19 severity	C	T	0.3536	0.016561	0.037185	0.656	1388342	120.667	0.000527
Breast cancer	ieu-a-1126	rs72658071	8	76305785	T	A	0.0877	0.1182	0.0107	2.58e-28	228951	COVID-19 severity	T	A	0.07388	0.029698	0.045769	0.5164	1388342	122.03	0.000533
Breast cancer	ieu-a-1126	rs72725173	14	68509589	A	G	0.1578	0.0559	0.0085	3.88e-11	228951	COVID-19 severity	A	G	0.142	-0.022194	0.034546	0.5206	1388342	43.25	0.000189
Breast cancer	ieu-a-1126	rs72755295	1	242034263	G	A	0.0309	0.1376	0.0179	1.65e-14	228951	COVID-19 severity	G	A	0.03198	-0.064727	0.080623	0.4221	1388342	59.0923	0.000258
Breast cancer	ieu-a-1126	rs73949122	2	121157485	G	C	0.1664	-0.0593	0.0084	1.85e-12	228951	COVID-19 severity	G	C	0.172	-0.037719	0.035555	0.2888	1388342	49.8369	0.000218
Breast cancer	ieu-a-1126	rs7500067	16	80648296	G	A	0.2293	0.0785	0.0073	4.06e-27	228951	COVID-19 severity	G	A	0.2454	0.0051641	0.030979	0.8676	1388342	115.636	0.000505
Breast cancer	ieu-a-1126	rs7626742	3	27268398	T	G	0.5327	0.1046	0.0062	1.61e-63	228951	COVID-19 severity	T	G	0.5254	0.013234	0.0267	0.6201	1388342	284.63	0.001242
Breast cancer	ieu-a-1126	rs7650602	3	141147414	C	T	0.4422	0.0489	0.0063	6.22e-15	228951	COVID-19 severity	C	T	0.4476	-0.070497	0.034722	0.04232	1388342	60.2472	0.000263
Breast cancer	ieu-a-1126	rs76956704	6	152031496	T	C	0.03	0.1352	0.0182	1.27e-13	228951	COVID-19 severity	T	C	0.02685	-0.0071465	0.089266	0.9362	1388342	55.1837	0.000241
Breast cancer	ieu-a-1126	rs7697216	4	175828036	C	T	0.8819	0.1039	0.0098	1.61e-26	228951	COVID-19 severity	C	T	0.8764	-0.069838	0.040973	0.08829	1388342	112.403	0.000491
Breast cancer	ieu-a-1126	rs77528541	4	126843504	T	G	0.1361	-0.0583	0.0096	1.41e-09	228951	COVID-19 severity	T	G	0.1273	-0.045289	0.058108	0.4357	1388342	36.8803	0.000161
Breast cancer	ieu-a-1126	rs78440108	14	93070286	T	C	0.1718	-0.0595	0.0084	1.62e-12	228951	COVID-19 severity	T	C	0.1652	-0.035955	0.044538	0.4195	1388342	50.1736	0.000219
Breast cancer	ieu-a-1126	rs78540526	11	69331418	T	C	0.0756	0.2758	0.0113	1.81e-131	228951	COVID-19 severity	T	C	0.07731	-0.03354	0.053666	0.532	1388342	595.706	0.002595
Breast cancer	ieu-a-1126	rs7904249	10	80887337	A	G	0.1592	0.0764	0.0084	6.98e-20	228951	COVID-19 severity	A	G	0.1515	-0.092656	0.037068	0.01243	1388342	82.7234	0.000361
Breast cancer	ieu-a-1126	rs7971	7	21940960	G	A	0.3531	-0.0365	0.0065	1.93e-08	228951	COVID-19 severity	G	A	0.3495	-0.028112	0.027494	0.3066	1388342	31.5325	0.000138
Breast cancer	ieu-a-1126	rs9361840	6	82254932	G	A	0.2368	0.0541	0.0072	7.14e-14	228951	COVID-19 severity	G	A	0.244	0.02838	0.031405	0.3662	1388342	56.4585	0.000247
Breast cancer	ieu-a-1126	rs941764	14	91841069	G	A	0.3429	0.0463	0.0065	8.21e-13	228951	COVID-19 severity	G	A	0.3436	-0.0019537	0.027632	0.9436	1388342	50.7382	0.000222
Breast cancer	ieu-a-1126	rs9693444	8	29509616	C	A	0.6757	-0.0626	0.0066	1.6e-21	228951	COVID-19 severity	C	A	0.6707	0.0063499	0.027826	0.8195	1388342	89.9624	0.000393
Breast cancer	ieu-a-1126	rs9833888	3	99723580	T	G	0.2259	0.0457	0.0074	5.15e-10	228951	COVID-19 severity	T	G	0.2342	0.0119	0.032136	0.7112	1388342	38.139	0.000167
ER+ breast cancer	ieu-a-1127	rs10423928	19	46182304	A	T	0.2138	0.0557	0.0095	5.09e-09	175475	COVID-19 severity	A	T	0.2181	0.020257	0.033585	0.5464	1388342	34.3766	0.000196
ER+ breast cancer	ieu-a-1127	rs10828249	10	21824727	A	G	0.358	0.0726	0.0077	6.72e-21	175475	COVID-19 severity	A	G	0.3413	0.018495	0.027195	0.4965	1388342	88.898	0.000506
ER+ breast cancer	ieu-a-1127	rs10896047	11	65572431	A	G	0.4858	-0.0493	0.0074	2.32e-11	175475	COVID-19 severity	A	G	0.4938	-0.020206	0.033964	0.5519	1388342	44.3844	0.000253
ER+ breast cancer	ieu-a-1127	rs10941679	5	44706498	G	A	0.2511	0.1563	0.0084	8.27e-78	175475	COVID-19 severity	G	A	0.2571	-0.023912	0.039068	0.5405	1388342	346.226	0.001969
ER+ breast cancer	ieu-a-1127	rs10995201	10	64299890	G	A	0.1591	-0.1379	0.0105	1.12e-39	175475	COVID-19 severity	G	A	0.1494	-0.0051719	0.048446	0.915	1388342	172.484	0.000982
ER+ breast cancer	ieu-a-1127	rs11117758	1	217220574	A	G	0.2082	-0.05	0.0091	4.06e-08	175475	COVID-19 severity	A	G	0.1972	0.00093561	0.040502	0.9816	1388342	30.1896	0.000172
ER+ breast cancer	ieu-a-1127	rs11133838	5	16254310	G	A	0.5841	-0.0415	0.0075	2.83e-08	175475	COVID-19 severity	G	A	0.5878	0.0087753	0.026841	0.7437	1388342	30.6178	0.000174
ER+ breast cancer	ieu-a-1127	rs11571818	13	32968810	C	T	0.0081	0.239	0.0397	1.69e-09	175475	COVID-19 severity	C	T	0.009085	-0.18324	0.19875	0.3565	1388342	36.2422	0.000206
ER+ breast cancer	ieu-a-1127	rs11624164	14	68986157	T	C	0.2552	-0.1037	0.0086	1.38e-33	175475	COVID-19 severity	T	C	0.2626	-0.071126	0.04085	0.08166	1388342	145.399	0.000828
ER+ breast cancer	ieu-a-1127	rs11822830	11	129461016	G	A	0.5961	0.0445	0.0075	3.33e-09	175475	COVID-19 severity	G	A	0.5745	-0.0087237	0.027064	0.7472	1388342	35.2044	0.000201
ER+ breast cancer	ieu-a-1127	rs12550713	8	128370949	G	C	0.3991	0.1093	0.0075	2.99e-48	175475	COVID-19 severity	G	C	0.3913	-0.031622	0.02685	0.2389	1388342	212.382	0.001209
ER+ breast cancer	ieu-a-1127	rs12703654	7	139954640	A	C	0.4491	0.0587	0.0077	3.1e-14	175475	COVID-19 severity	A	C	0.4283	-0.057862	0.034731	0.09571	1388342	58.1159	0.000331
ER+ breast cancer	ieu-a-1127	rs12711947	2	121244272	C	T	0.8983	0.0864	0.0124	3.41e-12	175475	COVID-19 severity	C	T	0.9056	-0.016444	0.055551	0.7672	1388342	48.5494	0.000277
ER+ breast cancer	ieu-a-1127	rs12769650	10	115153192	A	G	0.1276	0.0746	0.011	1.1e-11	175475	COVID-19 severity	A	G	0.1321	-0.11069	0.039019	0.004555	1388342	45.9931	0.000262
ER+ breast cancer	ieu-a-1127	rs13267382	8	117209548	G	A	0.6478	-0.0427	0.0077	2.93e-08	175475	COVID-19 severity	G	A	0.6276	-0.016084	0.034641	0.6424	1388342	30.7521	0.000175
ER+ breast cancer	ieu-a-1127	rs1361549	6	82287685	A	G	0.4191	-0.0451	0.0075	1.56e-09	175475	COVID-19 severity	A	G	0.4255	0.0054586	0.026911	0.8393	1388342	36.1602	0.000206
ER+ breast cancer	ieu-a-1127	rs143048713	3	46893173	GGT	G	0.104	-0.0999	0.0126	2.45e-15	175475	COVID-19 severity	GGT	G	0.09919	-0.054974	0.05184	0.2889	1388342	62.8622	0.000358
ER+ breast cancer	ieu-a-1127	rs1432679	5	158244083	T	C	0.5669	-0.0695	0.0074	5.77e-21	175475	COVID-19 severity	T	C	0.5717	-0.014	0.026766	0.6009	1388342	88.2076	0.000502
ER+ breast cancer	ieu-a-1127	rs151309152	10	123234980	A	C	0.0275	0.1492	0.0224	2.98e-11	175475	COVID-19 severity	A	C	0.02515	-0.052823	0.13631	0.6984	1388342	44.3651	0.000253
ER+ breast cancer	ieu-a-1127	rs1685191	19	44283232	T	C	0.5677	-0.0635	0.0077	1.52e-16	175475	COVID-19 severity	T	C	0.5499	-0.024785	0.035581	0.4861	1388342	68.0089	0.000387
ER+ breast cancer	ieu-a-1127	rs16857609	2	218296508	T	C	0.2621	0.0721	0.0083	3.43e-18	175475	COVID-19 severity	T	C	0.2762	0.028938	0.030002	0.3348	1388342	75.4596	0.00043
ER+ breast cancer	ieu-a-1127	rs16867692	8	102430331	G	A	0.197	0.0576	0.0096	2.1e-09	175475	COVID-19 severity	G	A	0.2058	0.054171	0.044609	0.2246	1388342	36	0.000205
ER+ breast cancer	ieu-a-1127	rs17035305	1	10616505	A	C	0.3146	-0.0436	0.0079	4.15e-08	175475	COVID-19 severity	A	C	0.3272	-0.0040673	0.028822	0.8878	1388342	30.4592	0.000174
ER+ breast cancer	ieu-a-1127	rs17268829	7	94113799	C	T	0.2796	0.0517	0.0082	2.4e-10	175475	COVID-19 severity	C	T	0.2626	-0.0088962	0.029437	0.7625	1388342	39.7515	0.000226
ER+ breast cancer	ieu-a-1127	rs17426269	1	88156923	A	G	0.1488	0.0576	0.0103	1.88e-08	175475	COVID-19 severity	A	G	0.1341	0.060824	0.046148	0.1875	1388342	31.2731	0.000178
ER+ breast cancer	ieu-a-1127	rs17617028	4	106064683	A	G	0.2265	0.0569	0.0087	7.64e-11	175475	COVID-19 severity	A	G	0.2218	-0.10605	0.032463	0.001087	1388342	42.7746	0.000244
ER+ breast cancer	ieu-a-1127	rs17838698	3	30684907	T	C	0.2978	0.0624	0.008	5.78e-15	175475	COVID-19 severity	T	C	0.3092	-0.054996	0.029419	0.06156	1388342	60.84	0.000347
ER+ breast cancer	ieu-a-1127	rs1812715	17	53174966	G	A	0.6943	0.0908	0.0081	2.66e-29	175475	COVID-19 severity	G	A	0.69	0.032791	0.029045	0.2589	1388342	125.661	0.000716
ER+ breast cancer	ieu-a-1127	rs2016394	2	172972971	A	G	0.4753	-0.0603	0.0074	3.22e-16	175475	COVID-19 severity	A	G	0.4816	0.020225	0.035399	0.5678	1388342	66.4005	0.000378
ER+ breast cancer	ieu-a-1127	rs2253012	14	37228504	T	C	0.432	0.0511	0.0078	5.19e-11	175475	COVID-19 severity	T	C	0.4238	-0.0050779	0.03444	0.8828	1388342	42.9193	0.000245
ER+ breast cancer	ieu-a-1127	rs2461201	10	123799214	T	C	0.3483	0.0473	0.0078	1.67e-09	175475	COVID-19 severity	T	C	0.3475	0.017762	0.035289	0.6147	1388342	36.7733	0.00021
ER+ breast cancer	ieu-a-1127	rs28649231	14	68423215	A	G	0.1907	0.0651	0.0095	8.8e-12	175475	COVID-19 severity	A	G	0.1856	-0.011832	0.041481	0.7755	1388342	46.9586	0.000268
ER+ breast cancer	ieu-a-1127	rs2957449	8	106357736	C	T	0.5331	0.0475	0.0076	5.24e-10	175475	COVID-19 severity	C	T	0.5713	-0.019709	0.026639	0.4594	1388342	39.0625	0.000223
ER+ breast cancer	ieu-a-1127	rs2992756	1	18807339	C	T	0.5202	-0.0608	0.0076	9.93e-16	175475	COVID-19 severity	C	T	0.5183	-0.043068	0.026477	0.1038	1388342	64	0.000365
ER+ breast cancer	ieu-a-1127	rs310302	8	23647494	A	G	0.4023	0.0444	0.0075	3.63e-09	175475	COVID-19 severity	A	G	0.4037	0.022182	0.034613	0.5216	1388342	35.0464	0.0002
ER+ breast cancer	ieu-a-1127	rs3217992	9	22003223	T	C	0.3749	-0.0576	0.0076	4.6e-14	175475	COVID-19 severity	T	C	0.3766	-0.025803	0.027092	0.3409	1388342	57.4404	0.000327
ER+ breast cancer	ieu-a-1127	rs34196306	6	27425644	C	G	0.0833	-0.0889	0.015	2.99e-09	175475	COVID-19 severity	C	G	0.08208	0.038721	0.0796	0.6267	1388342	35.1254	0.0002
ER+ breast cancer	ieu-a-1127	rs35273427	1	120436751	C	T	0.0599	0.0937	0.016	4.87e-09	175475	COVID-19 severity	C	T	0.05909	0.096302	0.077782	0.2157	1388342	34.2957	0.000195
ER+ breast cancer	ieu-a-1127	rs35383942	1	201437832	T	C	0.0561	0.0918	0.0164	2.33e-08	175475	COVID-19 severity	T	C	0.08016	-0.053918	0.074563	0.4696	1388342	31.3327	0.000179
ER+ breast cancer	ieu-a-1127	rs3769821	2	202123430	T	C	0.6678	-0.0545	0.0078	2.09e-12	175475	COVID-19 severity	T	C	0.6582	-0.016925	0.027551	0.539	1388342	48.8207	0.000278
ER+ breast cancer	ieu-a-1127	rs3821902	3	63941697	G	T	0.1357	0.0589	0.0106	3.18e-08	175475	COVID-19 severity	G	T	0.116	0.032744	0.03747	0.3822	1388342	30.8758	0.000176
ER+ breast cancer	ieu-a-1127	rs4286946	8	36849946	G	C	0.1742	-0.0748	0.0099	4.91e-14	175475	COVID-19 severity	G	C	0.1619	-0.052685	0.033897	0.1201	1388342	57.0864	0.000325
ER+ breast cancer	ieu-a-1127	rs4442975	2	217920769	T	G	0.5018	-0.1482	0.0073	6.65e-91	175475	COVID-19 severity	T	G	0.493	0.05738	0.033673	0.08838	1388342	412.146	0.002343
ER+ breast cancer	ieu-a-1127	rs4703870	5	81492643	A	G	0.7537	0.0613	0.0088	3.32e-12	175475	COVID-19 severity	A	G	0.763	-0.037114	0.030757	0.2276	1388342	48.5239	0.000276
ER+ breast cancer	ieu-a-1127	rs4784227	16	52599188	T	C	0.2385	0.2296	0.0084	3.93e-164	175475	COVID-19 severity	T	C	0.2439	0.032602	0.030444	0.2842	1388342	747.111	0.00424
ER+ breast cancer	ieu-a-1127	rs4820318	22	38570313	A	G	0.3749	-0.0632	0.0076	1.1e-16	175475	COVID-19 severity	A	G	0.3729	-0.01537	0.027019	0.5694	1388342	69.1524	0.000394
ER+ breast cancer	ieu-a-1127	rs4894562	3	172283173	A	G	0.2171	0.0519	0.0089	4.57e-09	175475	COVID-19 severity	A	G	0.2371	-0.033157	0.042414	0.4344	1388342	34.0059	0.000194
ER+ breast cancer	ieu-a-1127	rs490706	3	27330615	A	G	0.5247	0.1148	0.0074	3.28e-54	175475	COVID-19 severity	A	G	0.52	0.014601	0.026704	0.5845	1388342	240.669	0.00137
ER+ breast cancer	ieu-a-1127	rs4971059	1	155148781	A	G	0.3636	0.0519	0.0077	1.27e-11	175475	COVID-19 severity	A	G	0.3934	0.015662	0.036406	0.667	1388342	45.4311	0.000259
ER+ breast cancer	ieu-a-1127	rs4980029	10	80886726	G	A	0.163	0.0759	0.0098	1.24e-14	175475	COVID-19 severity	G	A	0.1653	-0.066055	0.046099	0.1519	1388342	59.9834	0.000342
ER+ breast cancer	ieu-a-1127	rs527616	18	24337424	G	C	0.6202	0.0515	0.0076	1.37e-11	175475	COVID-19 severity	G	C	0.6015	-0.019533	0.037274	0.6003	1388342	45.9185	0.000262
ER+ breast cancer	ieu-a-1127	rs56083805	5	132442263	C	T	0.2422	-0.0595	0.0091	7e-11	175475	COVID-19 severity	C	T	0.2472	0.0043553	0.032032	0.8918	1388342	42.7515	0.000244
ER+ breast cancer	ieu-a-1127	rs56891541	5	56240748	TCC	T	0.2472	0.0578	0.0086	1.49e-11	175475	COVID-19 severity	TCC	T	0.2501	-0.040885	0.038686	0.2906	1388342	45.1709	0.000257
ER+ breast cancer	ieu-a-1127	rs5997389	22	29134719	A	G	0.0901	0.0882	0.0128	6.23e-12	175475	COVID-19 severity	A	G	0.1074	-0.105	0.051999	0.04346	1388342	47.4807	0.000271
ER+ breast cancer	ieu-a-1127	rs6062356	20	62879331	G	T	0.1493	0.0564	0.0103	4.13e-08	175475	COVID-19 severity	G	T	0.149	-0.0054354	0.036109	0.8803	1388342	29.9836	0.000171
ER+ breast cancer	ieu-a-1127	rs62048402	16	53803223	A	G	0.4164	-0.0593	0.0075	2.16e-15	175475	COVID-19 severity	A	G	0.4111	-0.019617	0.026865	0.4653	1388342	62.5154	0.000356
ER+ breast cancer	ieu-a-1127	rs62247166	3	71532738	T	C	0.475	-0.0406	0.0074	3.92e-08	175475	COVID-19 severity	T	C	0.4739	0.03982	0.034107	0.243	1388342	30.1015	0.000172
ER+ breast cancer	ieu-a-1127	rs62355902	5	56053723	T	A	0.1587	0.2032	0.0098	2.88e-96	175475	COVID-19 severity	T	A	0.1516	0.019154	0.036267	0.5974	1388342	429.928	0.002444
ER+ breast cancer	ieu-a-1127	rs6472903	8	76230301	T	G	0.8265	0.0784	0.0099	2.01e-15	175475	COVID-19 severity	T	G	0.8141	0.020646	0.035858	0.5648	1388342	62.7136	0.000357
ER+ breast cancer	ieu-a-1127	rs6762558	3	4742251	G	A	0.3868	0.0618	0.0076	3.18e-16	175475	COVID-19 severity	G	A	0.4011	-0.034628	0.027857	0.2139	1388342	66.1226	0.000377
ER+ breast cancer	ieu-a-1127	rs6815814	4	38816338	C	A	0.2543	0.055	0.0086	1.59e-10	175475	COVID-19 severity	C	A	0.1939	0.032738	0.036788	0.3735	1388342	40.9005	0.000233
ER+ breast cancer	ieu-a-1127	rs6904031	6	152055978	T	A	0.0647	0.1107	0.0148	6.67e-14	175475	COVID-19 severity	T	A	0.07934	0.058371	0.057268	0.3081	1388342	55.9464	0.000319
ER+ breast cancer	ieu-a-1127	rs7017073	8	129204262	C	T	0.2114	0.0628	0.0089	1.77e-12	175475	COVID-19 severity	C	T	0.2082	-0.014743	0.031008	0.6344	1388342	49.7897	0.000284
ER+ breast cancer	ieu-a-1127	rs7149262	14	37136545	A	C	0.2113	-0.0804	0.0091	1.45e-18	175475	COVID-19 severity	A	C	0.2001	0.02534	0.032769	0.4394	1388342	78.0601	0.000445
ER+ breast cancer	ieu-a-1127	rs7153397	14	91742924	T	C	0.6952	0.0536	0.0081	3.36e-11	175475	COVID-19 severity	T	C	0.7028	0.019973	0.036916	0.5885	1388342	43.7884	0.000249
ER+ breast cancer	ieu-a-1127	rs7223535	17	29211667	A	G	0.268	-0.0463	0.0084	3.2e-08	175475	COVID-19 severity	A	G	0.2752	0.00093347	0.029651	0.9749	1388342	30.3811	0.000173
ER+ breast cancer	ieu-a-1127	rs72658071	8	76305785	T	A	0.0873	0.1187	0.0128	1.37e-20	175475	COVID-19 severity	T	A	0.07388	0.029698	0.045769	0.5164	1388342	85.9966	0.00049
ER+ breast cancer	ieu-a-1127	rs72755295	1	242034263	G	A	0.0311	0.1481	0.0208	1.08e-12	175475	COVID-19 severity	G	A	0.03198	-0.064727	0.080623	0.4221	1388342	50.6971	0.000289
ER+ breast cancer	ieu-a-1127	rs7280197	21	16415732	C	T	0.3778	0.0461	0.0082	1.7e-08	175475	COVID-19 severity	C	T	0.3685	-0.054853	0.03496	0.1166	1388342	31.6063	0.00018
ER+ breast cancer	ieu-a-1127	rs73169065	22	41009707	T	A	0.1073	0.1108	0.0117	2.04e-21	175475	COVID-19 severity	T	A	0.1015	0.11677	0.045356	0.01004	1388342	89.6825	0.000511
ER+ breast cancer	ieu-a-1127	rs7463114	8	29507094	C	T	0.6757	-0.0684	0.0078	2.44e-18	175475	COVID-19 severity	C	T	0.6697	-0.0043378	0.027889	0.8764	1388342	76.8994	0.000438
ER+ breast cancer	ieu-a-1127	rs7500067	16	80648296	G	A	0.2301	0.0819	0.0086	2.26e-21	175475	COVID-19 severity	G	A	0.2454	0.0051641	0.030979	0.8676	1388342	90.6924	0.000517
ER+ breast cancer	ieu-a-1127	rs7650602	3	141147414	C	T	0.4421	0.0571	0.0075	2.27e-14	175475	COVID-19 severity	C	T	0.4476	-0.070497	0.034722	0.04232	1388342	57.9628	0.00033
ER+ breast cancer	ieu-a-1127	rs7697216	4	175828036	C	T	0.882	0.1338	0.0118	6.06e-30	175475	COVID-19 severity	C	T	0.8764	-0.069838	0.040973	0.08829	1388342	128.573	0.000732
ER+ breast cancer	ieu-a-1127	rs7729559	5	169568846	T	C	0.2217	0.057	0.0088	9.31e-11	175475	COVID-19 severity	T	C	0.2161	0.010475	0.03117	0.7368	1388342	41.9551	0.000239
ER+ breast cancer	ieu-a-1127	rs78029804	15	91538920	T	C	0.134	-0.076	0.011	4.57e-12	175475	COVID-19 severity	T	C	0.1355	0.019033	0.03948	0.6297	1388342	47.7355	0.000272
ER+ breast cancer	ieu-a-1127	rs78540526	11	69331418	T	C	0.0759	0.3277	0.0132	1.02e-136	175475	COVID-19 severity	T	C	0.07731	-0.03354	0.053666	0.532	1388342	616.318	0.0035
ER+ breast cancer	ieu-a-1127	rs7862747	9	110892899	A	C	0.6224	0.1237	0.0077	3.36e-58	175475	COVID-19 severity	A	C	0.6365	0.041296	0.034833	0.2358	1388342	258.082	0.001469
ER+ breast cancer	ieu-a-1127	rs8105994	19	18593553	C	T	0.3454	-0.0768	0.0078	8.65e-23	175475	COVID-19 severity	C	T	0.3564	0.041642	0.028192	0.1397	1388342	96.9467	0.000552
ER+ breast cancer	ieu-a-1127	rs811458	9	119405271	C	T	0.6879	0.0511	0.008	1.72e-10	175475	COVID-19 severity	C	T	0.7175	0.020584	0.028187	0.4652	1388342	40.8002	0.000232
ER+ breast cancer	ieu-a-1127	rs9421410	10	123095209	A	G	0.3274	-0.0599	0.008	6.03e-14	175475	COVID-19 severity	A	G	0.349	-0.011696	0.036807	0.7507	1388342	56.0627	0.000319
ER- breast cancer	ieu-a-1128	rs10069690	5	1279790	T	C	0.2601	0.1613	0.013	1.54e-35	127442	COVID-19 severity	T	C	0.2694	-0.029826	0.029782	0.3166	1388342	153.951	0.001207
ER- breast cancer	ieu-a-1128	rs10096351	8	128372172	G	A	0.5455	0.07	0.0114	7.14e-10	127442	COVID-19 severity	G	A	0.5488	-0.0085509	0.026556	0.7475	1388342	37.7039	0.000296
ER- breast cancer	ieu-a-1128	rs10179592	2	121246568	C	T	0.8991	0.1156	0.0193	2.3e-09	127442	COVID-19 severity	C	T	0.9058	-0.021851	0.055659	0.6946	1388342	35.8758	0.000281
ER- breast cancer	ieu-a-1128	rs10885405	10	114777670	T	C	0.4613	0.0716	0.0113	2e-10	127442	COVID-19 severity	T	C	0.4538	-0.032206	0.02654	0.2249	1388342	40.1485	0.000315
ER- breast cancer	ieu-a-1128	rs10995201	10	64299890	G	A	0.1582	-0.0963	0.0159	1.57e-09	127442	COVID-19 severity	G	A	0.1494	-0.0051719	0.048446	0.915	1388342	36.6824	0.000288
ER- breast cancer	ieu-a-1128	rs11571833	13	32972626	T	A	0.0081	0.4346	0.0588	1.49e-13	127442	COVID-19 severity	T	A	0.008963	-0.22282	0.19884	0.2625	1388342	54.6292	0.000428
ER- breast cancer	ieu-a-1128	rs12129456	1	202189087	G	T	0.4095	-0.0835	0.0118	1.41e-12	127442	COVID-19 severity	G	T	0.4238	0.027132	0.027046	0.3158	1388342	50.0736	0.000393
ER- breast cancer	ieu-a-1128	rs12990503	2	218294217	G	C	0.7368	-0.0734	0.0126	6.48e-09	127442	COVID-19 severity	G	C	0.7215	-0.037203	0.029745	0.211	1388342	33.9352	0.000266
ER- breast cancer	ieu-a-1128	rs1432679	5	158244083	T	C	0.5656	-0.073	0.0113	1.05e-10	127442	COVID-19 severity	T	C	0.5717	-0.014	0.026766	0.6009	1388342	41.7339	0.000327
ER- breast cancer	ieu-a-1128	rs17828955	14	69016645	C	T	0.2649	-0.0797	0.013	7.76e-10	127442	COVID-19 severity	C	T	0.2648	-0.090294	0.039486	0.02221	1388342	37.5863	0.000295
ER- breast cancer	ieu-a-1128	rs191981806	17	39449318	C	T	0.0275	0.1963	0.036	4.94e-08	127442	COVID-19 severity	C	T	0.02185	-0.1164	0.10217	0.2546	1388342	29.7328	0.000233
ER- breast cancer	ieu-a-1128	rs2169137	1	204497913	C	G	0.7396	-0.128	0.0128	1.42e-23	127442	COVID-19 severity	C	G	0.7602	-0.049432	0.029653	0.09551	1388342	100	0.000784
ER- breast cancer	ieu-a-1128	rs2747652	6	152437016	C	T	0.526	0.0991	0.0113	1.93e-18	127442	COVID-19 severity	C	T	0.5709	-0.0085489	0.026537	0.7473	1388342	76.9113	0.000603
ER- breast cancer	ieu-a-1128	rs3769823	2	202122995	G	A	0.7071	-0.0684	0.0121	1.76e-08	127442	COVID-19 severity	G	A	0.692	-0.018242	0.028359	0.5201	1388342	31.9552	0.000251
ER- breast cancer	ieu-a-1128	rs4143044	13	73956279	G	T	0.7661	0.0833	0.0135	6.89e-10	127442	COVID-19 severity	G	T	0.7801	-0.045074	0.039324	0.2517	1388342	38.0735	0.000299
ER- breast cancer	ieu-a-1128	rs4528762	2	121079515	C	A	0.2646	-0.1213	0.0147	1.92e-16	127442	COVID-19 severity	C	A	0.2629	-0.039591	0.042947	0.3566	1388342	68.0906	0.000534
ER- breast cancer	ieu-a-1128	rs4784227	16	52599188	T	C	0.2403	0.1368	0.0128	1.72e-26	127442	COVID-19 severity	T	C	0.2439	0.032602	0.030444	0.2842	1388342	114.223	0.000895
ER- breast cancer	ieu-a-1128	rs55872725	16	53809123	T	C	0.4152	-0.0784	0.0115	8.59e-12	127442	COVID-19 severity	T	C	0.4115	-0.016615	0.026813	0.5355	1388342	46.4768	0.000365
ER- breast cancer	ieu-a-1128	rs56069439	19	17393925	A	C	0.2971	0.155	0.0121	1.25e-37	127442	COVID-19 severity	A	C	0.2981	-0.0046851	0.029589	0.8742	1388342	164.094	0.001286
ER- breast cancer	ieu-a-1128	rs56309329	6	82295951	T	A	0.2368	0.0734	0.0131	2.1e-08	127442	COVID-19 severity	T	A	0.2438	0.025214	0.03142	0.4223	1388342	31.3942	0.000246
ER- breast cancer	ieu-a-1128	rs56687477	8	36832310	A	G	0.1577	-0.1114	0.016	3.19e-12	127442	COVID-19 severity	A	G	0.1443	-0.049229	0.036079	0.1724	1388342	48.4764	0.00038
ER- breast cancer	ieu-a-1128	rs616402	1	10566272	T	C	0.307	-0.1172	0.0124	2.65e-21	127442	COVID-19 severity	T	C	0.3157	0.0013115	0.028972	0.9639	1388342	89.333	0.0007
ER- breast cancer	ieu-a-1128	rs6569648	6	130349119	T	C	0.7651	0.0741	0.0135	4.26e-08	127442	COVID-19 severity	T	C	0.7702	-0.0065944	0.03105	0.8318	1388342	30.1279	0.000236
ER- breast cancer	ieu-a-1128	rs6725517	2	25129473	G	A	0.4065	-0.0683	0.0122	1.98e-08	127442	COVID-19 severity	G	A	0.4134	-0.050594	0.026694	0.05805	1388342	31.3416	0.000246
ER- breast cancer	ieu-a-1128	rs76956704	6	152031496	T	C	0.03	0.2193	0.0325	1.49e-11	127442	COVID-19 severity	T	C	0.02685	-0.0071465	0.089266	0.9362	1388342	45.5314	0.000357
ER- breast cancer	ieu-a-1128	rs7710996	5	44514350	G	A	0.7729	-0.0773	0.0132	5.19e-09	127442	COVID-19 severity	G	A	0.7758	0.066383	0.041781	0.1121	1388342	34.2934	0.000269
ER- breast cancer	ieu-a-1128	rs9397437	6	151952332	A	G	0.0682	0.2733	0.0206	2.76e-40	127442	COVID-19 severity	A	G	0.0579	-0.041281	0.050349	0.4123	1388342	176.013	0.001379
Endometrial cancer	ebi-a-GCST006464	rs10089519	8	129532118	G	A	0.666762	0.0902401	0.0162873	3.01578e-08	121885	COVID-19 severity	G	A	0.6691	0.027085	0.036584	0.4591	1388342	30.6974	0.000252
Endometrial cancer	ebi-a-GCST006464	rs10835920	11	32489664	T	C	0.364733	0.0892075	0.015698	1.32562e-08	121885	COVID-19 severity	T	C	0.3552	-0.043851	0.034623	0.2053	1388342	32.2934	0.000265
Endometrial cancer	ebi-a-GCST006464	rs113998067	1	38073356	C	T	0.0481754	0.204335	0.0370808	3.57726e-08	121885	COVID-19 severity	C	T	0.03711	-0.015097	0.06078	0.8038	1388342	30.366	0.000249
Endometrial cancer	ebi-a-GCST006464	rs11651052	17	36102381	G	A	0.547556	0.141454	0.0153955	4.00037e-20	121885	COVID-19 severity	G	A	0.5671	-0.045392	0.036107	0.2087	1388342	84.4195	0.000692
Endometrial cancer	ebi-a-GCST006464	rs148261157	2	60897579	A	G	0.0404386	0.229226	0.0415263	3.38992e-08	121885	COVID-19 severity	A	G	0.03578	0.069219	0.068352	0.3112	1388342	30.4706	0.00025
Endometrial cancer	ebi-a-GCST006464	rs1740828	6	21649085	A	G	0.485476	-0.137017	0.0168448	4.15145e-16	121885	COVID-19 severity	A	G	0.4838	0.040342	0.038175	0.2906	1388342	66.1633	0.000543
Endometrial cancer	ebi-a-GCST006464	rs17601876	15	51553909	G	A	0.484921	0.115832	0.0152668	3.26889e-14	121885	COVID-19 severity	G	A	0.4845	0.035403	0.033965	0.2973	1388342	57.5653	0.000472
Endometrial cancer	ebi-a-GCST006464	rs4733613	8	129599278	G	C	0.862502	-0.154791	0.0221996	3.10957e-12	121885	COVID-19 severity	G	C	0.8712	0.038199	0.053779	0.4775	1388342	48.6185	0.000399
Endometrial cancer	ebi-a-GCST006464	rs7981863	13	73812141	T	C	0.265982	-0.146429	0.0173105	2.69836e-17	121885	COVID-19 severity	T	C	0.246	-0.049411	0.037577	0.1885	1388342	71.5542	0.000587
Endometrial cancer	ebi-a-GCST006464	rs882380	17	46294236	A	C	0.608645	0.0919141	0.0156883	4.66283e-09	121885	COVID-19 severity	A	C	0.6083	0.039991	0.026935	0.1376	1388342	34.3252	0.000282
Endometrial cancer	ebi-a-GCST006464	rs937213	15	40322124	C	T	0.426577	0.089169	0.0152556	5.06512e-09	121885	COVID-19 severity	C	T	0.4324	0.017168	0.034563	0.6194	1388342	34.164	0.00028
Endometrial cancer	ebi-a-GCST006464	rs9668337	12	26426338	A	G	0.743413	0.107599	0.0176545	1.09628e-09	121885	COVID-19 severity	A	G	0.7278	-0.019208	0.029646	0.5171	1388342	37.1455	0.000305
Prostate cancer	ieu-b-85	rs1004030	14	23305649	C	T	0.4156	-0.0462	0.0082	1.55e-08	140254	COVID-19 severity	C	T	0.4197	-0.044047	0.03637	0.2259	1388342	31.7436	0.000226
Prostate cancer	ieu-b-85	rs10122495	9	34049779	A	T	0.704	-0.0501	0.0088	1.34e-08	140254	COVID-19 severity	A	T	0.6856	-0.023483	0.03913	0.5484	1388342	32.4123	0.000231
Prostate cancer	ieu-b-85	rs10127983	1	153923276	T	C	0.3117	0.0631	0.0085	1.02e-13	140254	COVID-19 severity	T	C	0.313	0.014911	0.028322	0.5985	1388342	55.1088	0.000393
Prostate cancer	ieu-b-85	rs10460109	18	73036165	C	T	0.5857	-0.0441	0.008	3.48e-08	140254	COVID-19 severity	C	T	0.5779	0.031368	0.034427	0.3622	1388342	30.3877	0.000217
Prostate cancer	ieu-b-85	rs1048019	6	160147630	G	A	0.2849	-0.0569	0.0091	3.22e-10	140254	COVID-19 severity	G	A	0.2988	-0.035797	0.029729	0.2286	1388342	39.0968	0.000279
Prostate cancer	ieu-b-85	rs1048169	9	19055965	C	T	0.379	0.0609	0.0081	6.53e-14	140254	COVID-19 severity	C	T	0.3737	-0.0099503	0.027211	0.7146	1388342	56.5281	0.000403
Prostate cancer	ieu-b-85	rs10486567	7	27976563	A	G	0.2373	-0.1335	0.0094	2.04e-45	140254	COVID-19 severity	A	G	0.242	-0.026467	0.031505	0.4009	1388342	201.7	0.001436
Prostate cancer	ieu-b-85	rs10793821	5	133836209	T	C	0.5795	0.0527	0.008	5.43e-11	140254	COVID-19 severity	T	C	0.5838	0.0085065	0.034473	0.8051	1388342	43.3952	0.000309
Prostate cancer	ieu-b-85	rs10845938	12	14416918	G	A	0.5541	0.0572	0.008	9.8e-13	140254	COVID-19 severity	G	A	0.5812	0.023799	0.034544	0.4908	1388342	51.1225	0.000364
Prostate cancer	ieu-b-85	rs10870546	12	133054609	G	A	0.7122	-0.0531	0.0089	2.87e-09	140254	COVID-19 severity	G	A	0.6849	0.089083	0.029732	0.002734	1388342	35.5966	0.000254
Prostate cancer	ieu-b-85	rs10947980	6	41525739	G	A	0.2634	0.0834	0.0089	8.78e-21	140254	COVID-19 severity	G	A	0.2765	-0.028576	0.030309	0.3458	1388342	87.8116	0.000626
Prostate cancer	ieu-b-85	rs11135766	8	23533623	T	C	0.5736	-0.1291	0.008	5.09e-59	140254	COVID-19 severity	T	C	0.5562	0.014961	0.026942	0.5787	1388342	260.419	0.001853
Prostate cancer	ieu-b-85	rs11135910	8	25892142	T	C	0.1529	0.0782	0.011	9.19e-13	140254	COVID-19 severity	T	C	0.1427	0.015682	0.036957	0.6713	1388342	50.5392	0.00036
Prostate cancer	ieu-b-85	rs11214775	11	113807181	A	G	0.2915	-0.071	0.009	3.93e-15	140254	COVID-19 severity	A	G	0.2914	0.061594	0.035551	0.08317	1388342	62.2346	0.000444
Prostate cancer	ieu-b-85	rs11263763	17	36103565	A	G	0.5292	0.2033	0.008	3.06e-141	140254	COVID-19 severity	A	G	0.5655	-0.047424	0.03549	0.1815	1388342	645.795	0.004583
Prostate cancer	ieu-b-85	rs113577745	2	10135681	G	C	0.098	0.0784	0.0131	2.09e-09	140254	COVID-19 severity	G	C	0.08575	-0.002026	0.044115	0.9634	1388342	35.817	0.000255
Prostate cancer	ieu-b-85	rs11666569	19	17214073	T	C	0.2867	-0.0516	0.009	8.17e-09	140254	COVID-19 severity	T	C	0.2698	0.012587	0.029187	0.6663	1388342	32.8711	0.000234
Prostate cancer	ieu-b-85	rs11691517	2	111893096	G	T	0.2589	-0.0635	0.0091	3.51e-12	140254	COVID-19 severity	G	T	0.2674	-0.011719	0.030857	0.7041	1388342	48.6928	0.000347
Prostate cancer	ieu-b-85	rs1182	9	132576060	A	C	0.2198	0.0581	0.0095	1.1e-09	140254	COVID-19 severity	A	C	0.225	-0.0090554	0.042902	0.8328	1388342	37.4029	0.000267
Prostate cancer	ieu-b-85	rs11863709	16	57654576	T	C	0.0403	-0.1481	0.022	1.78e-11	140254	COVID-19 severity	T	C	0.03961	0.016838	0.072707	0.8169	1388342	45.3174	0.000323
Prostate cancer	ieu-b-85	rs12004058	9	18564470	G	C	0.312	-0.0481	0.0086	2.36e-08	140254	COVID-19 severity	G	C	0.2937	0.012021	0.035688	0.7362	1388342	31.2819	0.000223
Prostate cancer	ieu-b-85	rs12139208	1	88213014	C	T	0.6286	-0.0458	0.0082	2.58e-08	140254	COVID-19 severity	C	T	0.6215	-0.090266	0.027167	0.0008918	1388342	31.1963	0.000222
Prostate cancer	ieu-b-85	rs12179053	6	160711566	T	C	0.2603	-0.0559	0.0091	6.5e-10	140254	COVID-19 severity	T	C	0.2621	0.033436	0.038337	0.3831	1388342	37.7347	0.000269
Prostate cancer	ieu-b-85	rs12510147	4	95521863	A	G	0.3115	-0.0888	0.0086	4.34e-25	140254	COVID-19 severity	A	G	0.3045	-0.047635	0.028859	0.09882	1388342	106.618	0.00076
Prostate cancer	ieu-b-85	rs12610267	19	38744733	G	A	0.5103	-0.0966	0.0079	4.87e-34	140254	COVID-19 severity	G	A	0.5381	0.023546	0.026461	0.3736	1388342	149.52	0.001065
Prostate cancer	ieu-b-85	rs12665339	6	30601232	G	A	0.1674	0.0615	0.0106	5.56e-09	140254	COVID-19 severity	G	A	0.1727	-0.044798	0.037758	0.2354	1388342	33.6619	0.00024
Prostate cancer	ieu-b-85	rs12795301	11	68992285	A	C	0.1586	0.2201	0.0105	3.07e-98	140254	COVID-19 severity	A	C	0.1461	0.0020046	0.035178	0.9546	1388342	439.401	0.003123
Prostate cancer	ieu-b-85	rs1283104	3	106962521	G	C	0.3788	0.047	0.0082	8.81e-09	140254	COVID-19 severity	G	C	0.3829	-0.011288	0.034596	0.7442	1388342	32.8525	0.000234
Prostate cancer	ieu-b-85	rs12956892	18	56746315	T	G	0.3021	0.0498	0.0086	7.68e-09	140254	COVID-19 severity	T	G	0.3054	0.021353	0.028853	0.4593	1388342	33.5322	0.000239
Prostate cancer	ieu-b-85	rs13174377	5	1543918	G	A	0.04	0.1432	0.021	8.74e-12	140254	COVID-19 severity	G	A	0.04922	0.092786	0.070024	0.1852	1388342	46.4994	0.000331
Prostate cancer	ieu-b-85	rs13332673	16	89940386	T	G	0.0129	0.2246	0.0394	1.18e-08	140254	COVID-19 severity	T	G	0.009824	-0.015658	0.13908	0.9104	1388342	32.4958	0.000232
Prostate cancer	ieu-b-85	rs145571764	22	40500261	G	GA	0.8173	-0.0721	0.0102	1.55e-12	140254	COVID-19 severity	G	GA	0.8188	0.015757	0.044716	0.7246	1388342	49.9655	0.000356
Prostate cancer	ieu-b-85	rs1482680	5	44392142	A	G	0.6667	-0.0501	0.0085	3.58e-09	140254	COVID-19 severity	A	G	0.6642	0.021256	0.036889	0.5645	1388342	34.7406	0.000248
Prostate cancer	ieu-b-85	rs16958674	16	57693055	T	C	0.2385	-0.0533	0.0094	1.27e-08	140254	COVID-19 severity	T	C	0.2582	0.096906	0.040919	0.01787	1388342	32.1513	0.000229
Prostate cancer	ieu-b-85	rs17369534	3	152064639	C	G	0.1047	-0.0873	0.0134	6.51e-11	140254	COVID-19 severity	C	G	0.08857	-0.045467	0.052058	0.3825	1388342	42.4443	0.000303
Prostate cancer	ieu-b-85	rs17599629	1	150658287	G	A	0.2181	0.0654	0.0096	9.87e-12	140254	COVID-19 severity	G	A	0.2198	0.030192	0.032269	0.3495	1388342	46.4102	0.000331
Prostate cancer	ieu-b-85	rs17621345	7	40875192	C	A	0.2587	-0.0715	0.0095	6.72e-14	140254	COVID-19 severity	C	A	0.2606	0.032886	0.038289	0.3904	1388342	56.6454	0.000404
Prostate cancer	ieu-b-85	rs17749618	11	76251818	G	A	0.324	-0.0609	0.0085	7.48e-13	140254	COVID-19 severity	G	A	0.3216	-0.061521	0.02898	0.03377	1388342	51.333	0.000366
Prostate cancer	ieu-b-85	rs17804499	4	74442349	C	G	0.0534	-0.1542	0.0192	9.15e-16	140254	COVID-19 severity	C	G	0.04984	0.031713	0.055753	0.5695	1388342	64.501	0.00046
Prostate cancer	ieu-b-85	rs1881502	11	1507512	C	T	0.8097	-0.0581	0.0101	7.42e-09	140254	COVID-19 severity	C	T	0.8128	-0.03136	0.033813	0.3537	1388342	33.091	0.000236
Prostate cancer	ieu-b-85	rs1978060	22	19749525	G	A	0.6127	0.0568	0.0083	8.54e-12	140254	COVID-19 severity	G	A	0.6188	-0.010683	0.036328	0.7687	1388342	46.8318	0.000334
Prostate cancer	ieu-b-85	rs2018336	6	11217897	C	T	0.2206	-0.0679	0.0096	1.91e-12	140254	COVID-19 severity	C	T	0.1977	-0.0041385	0.031415	0.8952	1388342	50.0262	0.000357
Prostate cancer	ieu-b-85	rs2028900	2	85767735	T	C	0.4418	-0.082	0.008	6.67e-25	140254	COVID-19 severity	T	C	0.4308	-0.065505	0.026591	0.01376	1388342	105.062	0.000749
Prostate cancer	ieu-b-85	rs2191139	19	42001210	C	T	0.7474	0.0875	0.0093	3.25e-21	140254	COVID-19 severity	C	T	0.7469	0.061389	0.039425	0.1194	1388342	88.5218	0.000631
Prostate cancer	ieu-b-85	rs2242652	5	1280028	A	G	0.2054	-0.1598	0.0105	3.46e-52	140254	COVID-19 severity	A	G	0.2055	-0.026108	0.042477	0.5388	1388342	231.619	0.001649
Prostate cancer	ieu-b-85	rs2256814	20	62373983	A	G	0.1904	-0.0958	0.0106	1.4e-19	140254	COVID-19 severity	A	G	0.1899	-0.070564	0.035051	0.0441	1388342	81.6807	0.000582
Prostate cancer	ieu-b-85	rs28441558	17	7803118	C	T	0.0548	0.1507	0.0182	1.02e-16	140254	COVID-19 severity	C	T	0.05847	0.11031	0.061807	0.0743	1388342	68.562	0.000489
Prostate cancer	ieu-b-85	rs28485589	2	173303031	G	A	0.0608	-0.2441	0.0176	1.11e-43	140254	COVID-19 severity	G	A	0.05674	0.054673	0.057577	0.3423	1388342	192.358	0.00137
Prostate cancer	ieu-b-85	rs2928681	8	23437981	A	C	0.5887	-0.0553	0.008	5.38e-12	140254	COVID-19 severity	A	C	0.5989	0.012277	0.02679	0.6468	1388342	47.7827	0.000341
Prostate cancer	ieu-b-85	rs3127580	6	160710851	T	C	0.1402	0.1214	0.0111	6.6e-28	140254	COVID-19 severity	T	C	0.1425	0.0246	0.055045	0.6549	1388342	119.617	0.000852
Prostate cancer	ieu-b-85	rs339351	6	117200434	A	C	0.3052	-0.0843	0.0087	2.9e-22	140254	COVID-19 severity	A	C	0.3132	-0.013444	0.029356	0.647	1388342	93.8894	0.000669
Prostate cancer	ieu-b-85	rs33984059	15	56385868	G	A	0.0225	-0.1761	0.0308	1.1e-08	140254	COVID-19 severity	G	A	0.02057	0.19607	0.091206	0.03157	1388342	32.6902	0.000233
Prostate cancer	ieu-b-85	rs34487581	10	897201	A	G	0.1585	0.0775	0.0109	9.34e-13	140254	COVID-19 severity	A	G	0.1709	-0.058877	0.038609	0.1273	1388342	50.5534	0.00036
Prostate cancer	ieu-b-85	rs35644221	12	90227779	A	G	0.3192	-0.0604	0.0088	8.14e-12	140254	COVID-19 severity	A	G	0.3394	0.0038505	0.037598	0.9184	1388342	47.1095	0.000336
Prostate cancer	ieu-b-85	rs4646284	6	160581543	T	TG	0.7075	-0.196	0.0087	2.92e-112	140254	COVID-19 severity	T	TG	0.7068	0.084439	0.041488	0.04182	1388342	507.544	0.003606
Prostate cancer	ieu-b-85	rs4711748	6	43694598	C	T	0.7746	-0.0521	0.0094	3.36e-08	140254	COVID-19 severity	C	T	0.7666	0.053119	0.039336	0.1769	1388342	30.7199	0.000219
Prostate cancer	ieu-b-85	rs4795643	17	30092614	A	C	0.2287	-0.0618	0.0103	1.64e-09	140254	COVID-19 severity	A	C	0.2177	0.015858	0.041785	0.7043	1388342	36	0.000257
Prostate cancer	ieu-b-85	rs4889467	16	82169385	T	C	0.6506	-0.0463	0.0082	1.91e-08	140254	COVID-19 severity	T	C	0.6561	-0.0085735	0.036047	0.812	1388342	31.8812	0.000227
Prostate cancer	ieu-b-85	rs4924487	15	40922915	C	G	0.8359	0.0622	0.0109	1.32e-08	140254	COVID-19 severity	C	G	0.8403	-0.057144	0.044914	0.2033	1388342	32.5633	0.000232
Prostate cancer	ieu-b-85	rs4962419	10	126697114	A	G	0.2664	0.0598	0.0089	1.62e-11	140254	COVID-19 severity	A	G	0.2489	-0.0047337	0.029307	0.8717	1388342	45.1463	0.000322
Prostate cancer	ieu-b-85	rs62003551	14	53424320	G	A	0.1425	-0.1005	0.0117	8.46e-18	140254	COVID-19 severity	G	A	0.1397	0.0082942	0.038066	0.8275	1388342	73.7837	0.000526
Prostate cancer	ieu-b-85	rs62186433	2	242257835	G	A	0.1486	0.0863	0.011	3.21e-15	140254	COVID-19 severity	G	A	0.1493	-0.074563	0.038439	0.05241	1388342	61.5512	0.000439
Prostate cancer	ieu-b-85	rs6465657	7	97816327	T	C	0.5365	-0.1005	0.0079	6.96e-37	140254	COVID-19 severity	T	C	0.5166	0.037722	0.026681	0.1574	1388342	161.837	0.001153
Prostate cancer	ieu-b-85	rs6557265	6	153433402	C	T	0.4226	-0.077	0.008	1.04e-21	140254	COVID-19 severity	C	T	0.4193	-0.023004	0.02659	0.387	1388342	92.6406	0.00066
Prostate cancer	ieu-b-85	rs6754084	2	202124997	C	T	0.7324	0.05	0.0091	3.53e-08	140254	COVID-19 severity	C	T	0.7272	-0.0018387	0.029817	0.9508	1388342	30.1896	0.000215
Prostate cancer	ieu-b-85	rs684232	17	618965	C	T	0.3534	0.0832	0.0082	4.34e-24	140254	COVID-19 severity	C	T	0.3513	0.028701	0.02741	0.2951	1388342	102.948	0.000733
Prostate cancer	ieu-b-85	rs6941125	6	109287209	A	T	0.1457	0.0704	0.0111	1.99e-10	140254	COVID-19 severity	A	T	0.1501	-0.0010974	0.037389	0.9766	1388342	40.2253	0.000287
Prostate cancer	ieu-b-85	rs6983267	8	128413305	T	G	0.4892	-0.2004	0.0079	2.81e-141	140254	COVID-19 severity	T	G	0.4814	0.0018223	0.026424	0.945	1388342	643.489	0.004567
Prostate cancer	ieu-b-85	rs72725868	8	128091418	G	A	0.0881	-0.1175	0.015	5.46e-15	140254	COVID-19 severity	G	A	0.09431	0.066932	0.071	0.3458	1388342	61.3611	0.000437
Prostate cancer	ieu-b-85	rs73110464	12	53312612	T	C	0.1277	0.1583	0.0116	1.11e-42	140254	COVID-19 severity	T	C	0.1295	-0.0078935	0.051767	0.8788	1388342	186.228	0.001326
Prostate cancer	ieu-b-85	rs7313765	12	65011980	A	G	0.4218	-0.0563	0.0082	5.72e-12	140254	COVID-19 severity	A	G	0.4183	-0.056033	0.034101	0.1004	1388342	47.1399	0.000336
Prostate cancer	ieu-b-85	rs73351629	8	128018466	G	C	0.3334	-0.1375	0.0085	5.15e-59	140254	COVID-19 severity	G	C	0.3154	0.017901	0.036647	0.6252	1388342	261.678	0.001862
Prostate cancer	ieu-b-85	rs7522437	1	204029890	A	G	0.4609	-0.0457	0.008	1.21e-08	140254	COVID-19 severity	A	G	0.4385	0.0054829	0.034428	0.8735	1388342	32.6327	0.000233
Prostate cancer	ieu-b-85	rs75358080	3	87398945	G	A	0.0373	-0.1452	0.0216	1.71e-11	140254	COVID-19 severity	G	A	0.03926	0.044316	0.074107	0.5498	1388342	45.1883	0.000322
Prostate cancer	ieu-b-85	rs77541621	8	128077146	A	G	0.0243	0.5907	0.0227	1.03e-149	140254	COVID-19 severity	A	G	0.02642	-0.067263	0.12241	0.5827	1388342	677.146	0.004805
Prostate cancer	ieu-b-85	rs77559646	2	242135265	A	G	0.0237	0.2492	0.0267	9.93e-21	140254	COVID-19 severity	A	G	0.02333	-0.10441	0.10687	0.3286	1388342	87.1111	0.000621
Prostate cancer	ieu-b-85	rs78416326	3	170074517	C	G	0.2062	-0.1763	0.0102	5.6e-67	140254	COVID-19 severity	C	G	0.2041	0.053416	0.043443	0.2189	1388342	298.748	0.002126
Prostate cancer	ieu-b-85	rs80326387	15	66705043	A	G	0.2583	0.0567	0.0091	4.64e-10	140254	COVID-19 severity	A	G	0.2611	0.0027912	0.030033	0.926	1388342	38.8225	0.000277
Prostate cancer	ieu-b-85	rs817833	9	110152977	T	G	0.8914	-0.0733	0.0131	2.14e-08	140254	COVID-19 severity	T	G	0.8963	0.011173	0.054327	0.8371	1388342	31.3087	0.000223
Prostate cancer	ieu-b-85	rs823121	1	205724302	A	G	0.4322	-0.0472	0.008	3.38e-09	140254	COVID-19 severity	A	G	0.4328	-0.034583	0.026819	0.1972	1388342	34.81	0.000248
Prostate cancer	ieu-b-85	rs878987	11	134266372	G	A	0.1459	0.0639	0.0117	4.77e-08	140254	COVID-19 severity	G	A	0.1547	0.037839	0.037835	0.3173	1388342	29.8284	0.000213
Prostate cancer	ieu-b-85	rs917811	7	21059022	T	C	0.6856	-0.0686	0.0085	5.51e-16	140254	COVID-19 severity	T	C	0.6794	-0.037084	0.029043	0.2017	1388342	65.1344	0.000464
Prostate cancer	ieu-b-85	rs9306894	2	20878105	G	A	0.3633	0.0777	0.0082	1.92e-21	140254	COVID-19 severity	G	A	0.3603	-0.03584	0.027182	0.1873	1388342	89.7872	0.00064
Prostate cancer	ieu-b-85	rs9443189	6	76495882	G	A	0.1429	-0.0635	0.0116	4.68e-08	140254	COVID-19 severity	G	A	0.1443	0.021012	0.0381	0.5813	1388342	29.9662	0.000214
Prostate cancer	ieu-b-85	rs9625483	22	28888939	A	G	0.0288	0.1338	0.024	2.43e-08	140254	COVID-19 severity	A	G	0.02025	0.066972	0.15335	0.6623	1388342	31.0806	0.000222
Prostate cancer	ieu-b-85	rs9686557	5	172959030	C	A	0.444	0.0482	0.008	1.94e-09	140254	COVID-19 severity	C	A	0.4379	-0.0046593	0.033838	0.8905	1388342	36.3006	0.000259
Prostate cancer	ieu-b-85	rs9812088	3	128263668	A	G	0.3	-0.0524	0.0088	2.99e-09	140254	COVID-19 severity	A	G	0.2819	-0.013714	0.036797	0.7094	1388342	35.4566	0.000253
Prostate cancer	ieu-b-85	rs9907478	17	47395729	T	C	0.0757	0.1064	0.0147	4.52e-13	140254	COVID-19 severity	T	C	0.06698	0.073356	0.06236	0.2395	1388342	52.39	0.000373
Prostate cancer	ieu-b-85	rs9911515	17	69115358	G	A	0.5197	-0.1618	0.0079	6.47e-93	140254	COVID-19 severity	G	A	0.5168	-0.013446	0.026641	0.6138	1388342	419.472	0.002982
Prostate cancer	ieu-b-85	rs9959454	18	76770820	G	A	0.2672	-0.0872	0.009	5.34e-22	140254	COVID-19 severity	G	A	0.2674	-0.0016196	0.038679	0.9666	1388342	93.8746	0.000669
Prostate cancer	ieu-b-85	rs9978557	21	42882462	T	C	0.098	-0.1009	0.0143	2.02e-12	140254	COVID-19 severity	T	C	0.09521	0.052227	0.057008	0.3596	1388342	49.7863	0.000355
Thyroid cancer	ieu-a-1082	rs1001948	10	25466693	C	A	0.6861	2.08667	0.1023	1.36773e-104	1187	COVID-19 severity	C	A	0.4049	0.034772	0.036497	0.3407	1388342	416.06	0.259865
Thyroid cancer	ieu-a-1082	rs10049939	4	65252628	G	A	0.8437	3.0297	0.1997	1.39316e-86	1187	COVID-19 severity	G	A	0.755	-0.0048867	0.038149	0.8981	1388342	230.167	0.162643
Thyroid cancer	ieu-a-1082	rs10124357	9	79429800	C	T	0.7295	2.05416	0.1069	1.43285e-94	1187	COVID-19 severity	C	T	0.4754	-0.018727	0.02653	0.4803	1388342	369.244	0.237571
Thyroid cancer	ieu-a-1082	rs1019024	8	1363967	C	T	0.4387	1.29088	0.09109	2.02395e-47	1187	COVID-19 severity	C	T	0.2502	0.011032	0.03928	0.7788	1388342	200.831	0.144917
Thyroid cancer	ieu-a-1082	rs10199888	2	216503552	T	C	0.2828	-1.20397	0.09614	1.41514e-37	1187	COVID-19 severity	T	C	0.1543	-0.0063183	0.046085	0.8909	1388342	156.828	0.116876
Thyroid cancer	ieu-a-1082	rs10208038	2	25032151	G	T	0.5615	0.540426	0.08517	1.92801e-10	1187	COVID-19 severity	G	T	0.4873	-0.013145	0.026749	0.6231	1388342	40.2624	0.03286
Thyroid cancer	ieu-a-1082	rs10260654	7	50191216	T	G	0.356	-0.521044	0.08762	2.41602e-09	1187	COVID-19 severity	T	G	0.4525	0.08569	0.0344	0.01274	1388342	35.3624	0.028977
Thyroid cancer	ieu-a-1082	rs1032389	12	99692723	A	C	0.2812	-0.617298	0.09315	2.59896e-11	1187	COVID-19 severity	A	C	0.3785	-0.020137	0.036529	0.5815	1388342	43.9161	0.035736
Thyroid cancer	ieu-a-1082	rs10474588	5	78772071	C	A	0.5398	0.663588	0.08487	3.95094e-15	1187	COVID-19 severity	C	A	0.4567	0.037419	0.034277	0.275	1388342	61.1348	0.04906
Thyroid cancer	ieu-a-1082	rs10475268	5	492922	T	G	0.4441	-0.57412	0.08545	1.54917e-11	1187	COVID-19 severity	T	G	0.5574	-0.084118	0.034451	0.01462	1388342	45.142	0.036697
Thyroid cancer	ieu-a-1082	rs10493096	1	42325122	A	C	0.1507	-0.683197	0.117	3.395e-09	1187	COVID-19 severity	A	C	0.1729	0.00048486	0.034734	0.9889	1388342	34.0973	0.027969
Thyroid cancer	ieu-a-1082	rs10494448	1	165831128	C	A	0.3019	-0.552169	0.09228	1.83101e-09	1187	COVID-19 severity	C	A	0.402	-0.0060005	0.034259	0.861	1388342	35.8038	0.029328
Thyroid cancer	ieu-a-1082	rs10502692	18	36040352	T	C	0.07807	-3.89026	0.4175	1.81886e-54	1187	COVID-19 severity	T	C	0.216	-0.048267	0.033079	0.1445	1388342	86.8249	0.068268
Thyroid cancer	ieu-a-1082	rs10513889	18	54011876	C	A	0.5832	0.468245	0.08528	3.69496e-08	1187	COVID-19 severity	C	A	0.5462	-0.007486	0.026522	0.7777	1388342	30.1475	0.02481
Thyroid cancer	ieu-a-1082	rs10744891	12	117722341	T	G	0.3274	-0.557568	0.08994	4.77101e-10	1187	COVID-19 severity	T	G	0.4234	0.032157	0.034026	0.3446	1388342	38.4317	0.031413
Thyroid cancer	ieu-a-1082	rs10762573	10	75798148	C	A	0.7425	0.768302	0.09634	7.78037e-16	1187	COVID-19 severity	C	A	0.6362	-0.017366	0.02812	0.5369	1388342	63.5991	0.050936
Thyroid cancer	ieu-a-1082	rs10777489	12	93653808	G	T	0.5295	-0.475613	0.0856	2.52802e-08	1187	COVID-19 severity	G	T	0.6067	-0.01487	0.026883	0.5802	1388342	30.8717	0.025391
Thyroid cancer	ieu-a-1082	rs10786634	10	103164342	G	T	0.5246	0.573233	0.08545	1.66917e-11	1187	COVID-19 severity	G	T	0.3684	0.014611	0.027143	0.5904	1388342	45.0027	0.036587
Thyroid cancer	ieu-a-1082	rs10787889	10	120758823	T	G	0.3478	-0.650854	0.08824	1.19895e-13	1187	COVID-19 severity	T	G	0.3955	0.013051	0.034581	0.7059	1388342	54.4047	0.043896
Thyroid cancer	ieu-a-1082	rs10812736	9	28064690	A	C	0.1699	-0.763141	0.1119	4.6505e-12	1187	COVID-19 severity	A	C	0.1911	0.018736	0.032783	0.5677	1388342	46.5103	0.037767
Thyroid cancer	ieu-a-1082	rs1082023	7	40006195	T	G	0.323	-1.96184	0.101	1.93019e-93	1187	COVID-19 severity	T	G	0.6509	0.019549	0.035463	0.5815	1388342	377.298	0.241502
Thyroid cancer	ieu-a-1082	rs10832835	11	2880009	C	A	0.2502	-2.3086	0.1175	1.5417e-104	1187	COVID-19 severity	C	A	0.5165	-0.0026659	0.034096	0.9377	1388342	386.031	0.245718
Thyroid cancer	ieu-a-1082	rs10833197	11	19953492	A	C	0.431	-0.579461	0.08526	9.00326e-12	1187	COVID-19 severity	A	C	0.5405	0.035666	0.034336	0.2989	1388342	46.191	0.037517
Thyroid cancer	ieu-a-1082	rs10860779	12	102127262	A	C	0.2764	-0.524756	0.09341	1.66598e-08	1187	COVID-19 severity	A	C	0.3225	-0.033204	0.029145	0.2546	1388342	31.5594	0.025941
Thyroid cancer	ieu-a-1082	rs10869031	9	74130286	G	T	0.5979	0.553559	0.08603	1.05699e-10	1187	COVID-19 severity	G	T	0.5065	-0.01615	0.026548	0.543	1388342	41.4026	0.033759
Thyroid cancer	ieu-a-1082	rs10877902	12	63044181	T	G	0.3463	0.658556	0.09125	3.76617e-13	1187	COVID-19 severity	T	G	0.238	0.022387	0.030085	0.4568	1388342	52.0858	0.042104
Thyroid cancer	ieu-a-1082	rs10894838	11	134410837	T	G	0.1618	-2.45877	0.1547	1.42692e-77	1187	COVID-19 severity	T	G	0.2638	0.0082132	0.038054	0.8291	1388342	252.613	0.175717
Thyroid cancer	ieu-a-1082	rs10916258	1	228219882	A	C	0.1515	-0.735011	0.1172	2.067e-10	1187	COVID-19 severity	A	C	0.2151	0.031717	0.043211	0.4629	1388342	39.3308	0.032124
Thyroid cancer	ieu-a-1082	rs10928200	2	144578152	T	G	0.2569	-0.761854	0.09678	1.84289e-15	1187	COVID-19 severity	T	G	0.3834	0.048012	0.02814	0.08797	1388342	61.9687	0.049695
Thyroid cancer	ieu-a-1082	rs10949938	7	64254791	T	G	0.7805	2.06593	0.1197	2.65399e-79	1187	COVID-19 severity	T	G	0.6419	0.0079223	0.027302	0.7717	1388342	297.881	0.20088
Thyroid cancer	ieu-a-1082	rs10952871	7	85593608	T	G	0.351	-0.493805	0.0879	1.74598e-08	1187	COVID-19 severity	T	G	0.411	-0.033333	0.026986	0.2168	1388342	31.5597	0.025942
Thyroid cancer	ieu-a-1082	rs11006981	10	28568378	C	A	0.06557	-2.36542	0.2435	5.00611e-32	1187	COVID-19 severity	C	A	0.1269	-0.04607	0.039198	0.2399	1388342	94.3667	0.07376
Thyroid cancer	ieu-a-1082	rs11041733	11	8103104	T	G	0.4017	-2.09883	0.09586	5.05825e-117	1187	COVID-19 severity	T	G	0.586	-0.031179	0.034851	0.371	1388342	479.38	0.288023
Thyroid cancer	ieu-a-1082	rs11098432	4	119203708	C	A	0.4889	0.493476	0.08449	4.68004e-09	1187	COVID-19 severity	C	A	0.4565	-0.041198	0.026726	0.1232	1388342	34.1131	0.027982
Thyroid cancer	ieu-a-1082	rs11132917	4	172764187	G	T	0.6498	0.555997	0.0875	1.77101e-10	1187	COVID-19 severity	G	T	0.6652	-0.046065	0.027511	0.09405	1388342	40.3765	0.03295
Thyroid cancer	ieu-a-1082	rs11688848	2	204916206	A	C	0.1695	-0.79518	0.1122	6.32557e-13	1187	COVID-19 severity	A	C	0.1685	-0.017484	0.043224	0.6858	1388342	50.2279	0.040663
Thyroid cancer	ieu-a-1082	rs11692610	2	203499512	C	T	0.1364	-2.46899	0.1757	4.02439e-63	1187	COVID-19 severity	C	T	0.2146	0.022623	0.039382	0.5657	1388342	197.467	0.142837
Thyroid cancer	ieu-a-1082	rs11708894	3	104966715	T	G	0.3553	-1.81708	0.09591	8.22621e-87	1187	COVID-19 severity	T	G	0.6088	-0.0094233	0.034596	0.7853	1388342	358.939	0.232482
Thyroid cancer	ieu-a-1082	rs11721807	4	157094509	T	G	0.2295	-0.715802	0.09962	3.93913e-13	1187	COVID-19 severity	T	G	0.2909	0.023119	0.029661	0.4357	1388342	51.6289	0.04175
Thyroid cancer	ieu-a-1082	rs11743743	5	6598553	A	C	0.4264	-0.726497	0.08588	1.7398e-17	1187	COVID-19 severity	A	C	0.5197	-0.011722	0.026636	0.6599	1388342	71.5622	0.056951
Thyroid cancer	ieu-a-1082	rs11786147	8	84764257	G	T	0.4327	0.519984	0.0856	1.11301e-09	1187	COVID-19 severity	G	T	0.4183	-0.018726	0.027127	0.49	1388342	36.9005	0.030199
Thyroid cancer	ieu-a-1082	rs11883054	19	10157219	G	T	0.7254	0.809232	0.09519	8.52707e-18	1187	COVID-19 severity	G	T	0.6926	0.023675	0.036813	0.5201	1388342	72.2709	0.057482
Thyroid cancer	ieu-a-1082	rs1193787	11	63095411	T	C	0.464	-0.665532	0.08469	2.81709e-15	1187	COVID-19 severity	T	C	0.5822	0.031669	0.026747	0.2364	1388342	61.7552	0.049533
Thyroid cancer	ieu-a-1082	rs11975969	7	32854040	G	T	0.6931	2.13962	0.1062	2.15278e-103	1187	COVID-19 severity	G	T	0.4522	0.053631	0.026753	0.045	1388342	405.905	0.255141
Thyroid cancer	ieu-a-1082	rs11993947	8	124971455	G	T	0.439	0.574364	0.08591	1.93108e-11	1187	COVID-19 severity	G	T	0.4041	0.01285	0.027213	0.6368	1388342	44.6979	0.036349
Thyroid cancer	ieu-a-1082	rs12040716	1	107109564	C	A	0.3667	0.528862	0.08897	2.44399e-09	1187	COVID-19 severity	C	A	0.2499	0.05406	0.029207	0.06418	1388342	35.3344	0.028955
Thyroid cancer	ieu-a-1082	rs12118017	1	111306729	C	A	0.2657	0.661656	0.09973	2.22895e-11	1187	COVID-19 severity	C	A	0.2219	-0.0095695	0.032646	0.7694	1388342	44.0162	0.035814
Thyroid cancer	ieu-a-1082	rs12140722	1	213091573	C	A	0.4797	0.635518	0.08543	7.85778e-14	1187	COVID-19 severity	C	A	0.4881	-0.027792	0.026556	0.2953	1388342	55.3395	0.044616
Thyroid cancer	ieu-a-1082	rs12151689	2	166656155	C	A	0.7209	0.661455	0.09328	9.13692e-13	1187	COVID-19 severity	C	A	0.6219	-0.0020467	0.027097	0.9398	1388342	50.2833	0.040706
Thyroid cancer	ieu-a-1082	rs1216502	11	100414877	C	A	0.8162	0.592578	0.1073	2.57199e-08	1187	COVID-19 severity	C	A	0.7668	0.013176	0.043393	0.7614	1388342	30.4994	0.025092
Thyroid cancer	ieu-a-1082	rs12186611	5	132805024	A	C	0.2716	-0.606236	0.09393	8.41783e-11	1187	COVID-19 severity	A	C	0.3538	-0.018693	0.035914	0.6027	1388342	41.6557	0.033959
Thyroid cancer	ieu-a-1082	rs12196235	6	103827338	C	A	0.5571	2.06436	0.09556	3.04089e-113	1187	COVID-19 severity	C	A	0.2578	-0.0037552	0.038735	0.9228	1388342	466.679	0.282548
Thyroid cancer	ieu-a-1082	rs1224751	6	58437809	T	C	0.4337	-0.613597	0.08499	4.13904e-13	1187	COVID-19 severity	T	C	0.4927	-0.079942	0.035722	0.02523	1388342	52.1232	0.042133
Thyroid cancer	ieu-a-1082	rs12403117	1	79174955	A	C	0.2722	-0.538026	0.09403	8.96004e-09	1187	COVID-19 severity	A	C	0.3109	-0.038743	0.02916	0.184	1388342	32.7396	0.026886
Thyroid cancer	ieu-a-1082	rs12433740	14	46933240	T	G	0.2538	-0.669235	0.09594	2.05494e-12	1187	COVID-19 severity	T	G	0.367	-0.01966	0.027438	0.4737	1388342	48.6584	0.039442
Thyroid cancer	ieu-a-1082	rs12441088	15	78928264	T	G	0.5583	-1.21462	0.09031	1.10994e-42	1187	COVID-19 severity	T	G	0.727	0.048579	0.038666	0.209	1388342	180.888	0.132432
Thyroid cancer	ieu-a-1082	rs12469609	2	83383702	G	T	0.5805	0.681416	0.08627	2.02488e-15	1187	COVID-19 severity	G	T	0.5514	0.027697	0.02671	0.2998	1388342	62.3886	0.050015
Thyroid cancer	ieu-a-1082	rs12510224	4	180702862	G	T	0.1798	-2.16631	0.1379	1.40799e-69	1187	COVID-19 severity	G	T	0.3989	-0.052446	0.027093	0.0529	1388342	246.782	0.17236
Thyroid cancer	ieu-a-1082	rs12524738	6	140194149	A	G	0.05297	-2.72159	0.319	1.08493e-28	1187	COVID-19 severity	A	G	0.1172	-0.027832	0.058101	0.6319	1388342	72.7887	0.05787
Thyroid cancer	ieu-a-1082	rs12595914	16	83628580	T	G	0.4533	-0.563523	0.08528	3.31589e-11	1187	COVID-19 severity	T	G	0.5559	-0.05693	0.026588	0.03226	1388342	43.6645	0.035538
Thyroid cancer	ieu-a-1082	rs12782349	10	54929003	A	C	0.3045	-0.555649	0.09054	6.99101e-10	1187	COVID-19 severity	A	C	0.37	0.00733	0.027663	0.791	1388342	37.6634	0.030804
Thyroid cancer	ieu-a-1082	rs12908044	15	37186014	A	C	0.7752	2.13369	0.1224	6.63437e-82	1187	COVID-19 severity	A	C	0.5895	-0.011437	0.03597	0.7505	1388342	303.878	0.204099
Thyroid cancer	ieu-a-1082	rs13019891	2	113829869	T	G	0.2479	-2.0159	0.1114	7.98914e-85	1187	COVID-19 severity	T	G	0.4576	0.0083084	0.034234	0.8082	1388342	327.467	0.216512
Thyroid cancer	ieu-a-1082	rs13292880	9	35817579	A	C	0.2652	-1.89712	0.1078	2.64119e-78	1187	COVID-19 severity	A	C	0.4071	0.016871	0.034217	0.622	1388342	309.708	0.207203
Thyroid cancer	ieu-a-1082	rs13404338	2	79450227	G	A	0.677	2.13453	0.1038	1.14025e-106	1187	COVID-19 severity	G	A	0.5323	-0.033685	0.034078	0.3229	1388342	422.873	0.263001
Thyroid cancer	ieu-a-1082	rs1358852	6	90120991	C	A	0.355	0.531804	0.0902	3.16497e-09	1187	COVID-19 severity	C	A	0.2708	0.084343	0.037684	0.02521	1388342	34.7608	0.028498
Thyroid cancer	ieu-a-1082	rs1370301	4	147947622	G	T	0.5569	0.643595	0.08547	3.89314e-14	1187	COVID-19 severity	G	T	0.5265	-0.01544	0.033997	0.6497	1388342	56.7019	0.045665
Thyroid cancer	ieu-a-1082	rs1388492	3	68245477	T	C	0.6763	0.530178	0.08976	3.002e-09	1187	COVID-19 severity	T	C	0.7171	-0.037857	0.038233	0.3221	1388342	34.8881	0.028599
Thyroid cancer	ieu-a-1082	rs1414154	13	80168006	A	C	0.5004	-0.463105	0.08447	3.81197e-08	1187	COVID-19 severity	A	C	0.5936	0.010985	0.034866	0.7527	1388342	30.0576	0.024738
Thyroid cancer	ieu-a-1082	rs1459522	3	22675098	T	G	0.3622	-0.523573	0.08729	1.74598e-09	1187	COVID-19 severity	T	G	0.459	0.00012004	0.034119	0.9972	1388342	35.977	0.029466
Thyroid cancer	ieu-a-1082	rs1467345	7	11783917	A	G	0.1736	-0.882856	0.1109	5.20955e-16	1187	COVID-19 severity	A	G	0.1339	-0.027896	0.041448	0.5009	1388342	63.3748	0.050766
Thyroid cancer	ieu-a-1082	rs1468696	3	45370416	G	T	0.5009	0.502031	0.08463	2.72201e-09	1187	COVID-19 severity	G	T	0.3923	-0.023988	0.034379	0.4853	1388342	35.1894	0.028839
Thyroid cancer	ieu-a-1082	rs1481897	8	13582367	A	C	0.318	-0.543693	0.09031	1.47601e-09	1187	COVID-19 severity	A	C	0.4128	0.0016845	0.034658	0.9612	1388342	36.244	0.029678
Thyroid cancer	ieu-a-1082	rs1499214	3	1390985	T	G	0.2695	-0.604038	0.09358	8.33105e-11	1187	COVID-19 severity	T	G	0.3298	0.00053652	0.035905	0.9881	1388342	41.6641	0.033965
Thyroid cancer	ieu-a-1082	rs1513052	12	17387703	C	A	0.6588	0.599657	0.08862	1.05706e-11	1187	COVID-19 severity	C	A	0.5829	0.058419	0.034411	0.08957	1388342	45.787	0.037201
Thyroid cancer	ieu-a-1082	rs1547039	14	94937886	A	C	0.4527	-1.9929	0.0943	7.24436e-108	1187	COVID-19 severity	A	C	0.6737	0.025392	0.037277	0.4958	1388342	446.63	0.273732
Thyroid cancer	ieu-a-1082	rs156166	3	6425168	C	A	0.5282	0.606052	0.08453	6.06178e-13	1187	COVID-19 severity	C	A	0.3828	-0.010893	0.036972	0.7683	1388342	51.4041	0.041576
Thyroid cancer	ieu-a-1082	rs1577026	13	59445576	A	C	0.09253	-2.46876	0.2104	2.65705e-46	1187	COVID-19 severity	A	C	0.172	0.057259	0.034621	0.09815	1388342	137.679	0.104091
Thyroid cancer	ieu-a-1082	rs1594467	6	7920361	G	A	0.6349	2.62073	0.1073	6.18016e-156	1187	COVID-19 severity	G	A	0.333	0.028789	0.036471	0.4299	1388342	596.548	0.334848
Thyroid cancer	ieu-a-1082	rs1610315	6	166662128	A	C	0.475	-2.07864	0.0962	1.63305e-113	1187	COVID-19 severity	A	C	0.7695	-0.012576	0.038488	0.7438	1388342	466.883	0.282637
Thyroid cancer	ieu-a-1082	rs163192	5	68379836	A	C	0.4229	-0.568278	0.08593	3.1989e-11	1187	COVID-19 severity	A	C	0.4738	0.021218	0.034184	0.5348	1388342	43.7353	0.035594
Thyroid cancer	ieu-a-1082	rs1667822	3	163930675	T	G	0.4096	-1.97041	0.09571	1.91867e-102	1187	COVID-19 severity	T	G	0.6907	-0.041985	0.028467	0.1403	1388342	423.837	0.263443
Thyroid cancer	ieu-a-1082	rs1683564	19	859214	A	C	0.2865	-0.639227	0.09313	4.87304e-12	1187	COVID-19 severity	A	C	0.3548	-0.020589	0.036643	0.5742	1388342	47.1119	0.038237
Thyroid cancer	ieu-a-1082	rs16838428	4	6200768	T	C	0.0774	-2.95459	0.2916	2.18675e-42	1187	COVID-19 severity	T	C	0.1274	0.15413	0.062754	0.01405	1388342	102.664	0.079729
Thyroid cancer	ieu-a-1082	rs17039540	4	161323274	A	C	0.1881	-0.581248	0.1068	4.15403e-08	1187	COVID-19 severity	A	C	0.3128	-0.027346	0.029611	0.3558	1388342	29.6197	0.024386
Thyroid cancer	ieu-a-1082	rs17137948	7	104115294	A	C	0.5191	0.666895	0.08455	2.24698e-15	1187	COVID-19 severity	A	C	0.4334	0.024256	0.026776	0.365	1388342	62.2139	0.049882
Thyroid cancer	ieu-a-1082	rs17256058	14	23592491	T	G	0.1303	-0.692547	0.1255	2.25798e-08	1187	COVID-19 severity	T	G	0.1064	0.038236	0.048271	0.4283	1388342	30.4517	0.025054
Thyroid cancer	ieu-a-1082	rs17294252	4	138801097	A	C	0.1525	-0.64531	0.1159	1.81401e-08	1187	COVID-19 severity	A	C	0.2331	-0.028523	0.03212	0.3745	1388342	31.0006	0.025494
Thyroid cancer	ieu-a-1082	rs17381234	13	108998914	G	A	0.2052	-1.88717	0.1192	1.42004e-65	1187	COVID-19 severity	G	A	0.3372	-0.0013658	0.037005	0.9706	1388342	250.651	0.174591
Thyroid cancer	ieu-a-1082	rs1750330	1	119493411	C	A	0.5294	0.464738	0.08413	3.07496e-08	1187	COVID-19 severity	C	A	0.4235	0.037774	0.026635	0.1561	1388342	30.5151	0.025105
Thyroid cancer	ieu-a-1082	rs17571067	1	226004162	A	C	0.291	-0.569515	0.09178	4.43598e-10	1187	COVID-19 severity	A	C	0.398	-0.025249	0.027625	0.3607	1388342	38.5047	0.031471
Thyroid cancer	ieu-a-1082	rs17600706	14	99150918	T	G	0.223	-0.570753	0.09982	8.71907e-09	1187	COVID-19 severity	T	G	0.2371	-0.094669	0.038976	0.01515	1388342	32.6935	0.026849
Thyroid cancer	ieu-a-1082	rs17647119	18	33118693	A	C	0.2214	-0.565634	0.1007	1.56801e-08	1187	COVID-19 severity	A	C	0.2257	-0.035254	0.039572	0.373	1388342	31.5509	0.025935
Thyroid cancer	ieu-a-1082	rs1792746	18	53803363	A	C	0.3795	-0.623435	0.08744	7.83971e-13	1187	COVID-19 severity	A	C	0.4435	-0.058124	0.034541	0.09242	1388342	50.8349	0.041134
Thyroid cancer	ieu-a-1082	rs1813617	2	19590019	A	C	0.3482	-0.510826	0.0875	4.64098e-09	1187	COVID-19 severity	A	C	0.4086	-0.018382	0.026954	0.4953	1388342	34.0824	0.027957
Thyroid cancer	ieu-a-1082	rs1822338	11	24359477	C	A	0.6276	0.520035	0.08711	2.103e-09	1187	COVID-19 severity	C	A	0.6296	0.017239	0.02695	0.5224	1388342	35.6393	0.029197
Thyroid cancer	ieu-a-1082	rs1827488	15	82391020	G	T	0.6646	0.581785	0.08911	5.44252e-11	1187	COVID-19 severity	G	T	0.6091	-0.028594	0.027013	0.2898	1388342	42.6258	0.034722
Thyroid cancer	ieu-a-1082	rs1846861	2	227359131	C	A	0.5473	0.652773	0.08532	1.51496e-14	1187	COVID-19 severity	C	A	0.4416	0.030178	0.034053	0.3755	1388342	58.536	0.047072
Thyroid cancer	ieu-a-1082	rs1868534	11	132094466	G	T	0.5171	0.520708	0.08434	5.92598e-10	1187	COVID-19 severity	G	T	0.4737	-0.00020703	0.033839	0.9951	1388342	38.1172	0.031164
Thyroid cancer	ieu-a-1082	rs1880256	2	36162761	C	A	0.7554	0.632805	0.0972	5.45758e-11	1187	COVID-19 severity	C	A	0.6283	-0.003209	0.037155	0.9312	1388342	42.3845	0.034532
Thyroid cancer	ieu-a-1082	rs1885597	14	25043068	G	T	0.5337	0.498403	0.08517	4.41804e-09	1187	COVID-19 severity	G	T	0.4681	0.024809	0.034064	0.4664	1388342	34.2443	0.028086
Thyroid cancer	ieu-a-1082	rs1887387	9	90879921	T	C	0.3552	-0.641884	0.08793	2.14882e-13	1187	COVID-19 severity	T	C	0.3039	-0.058283	0.038479	0.1299	1388342	53.2892	0.043035
Thyroid cancer	ieu-a-1082	rs1889562	6	119449385	G	T	0.4127	0.628609	0.08707	3.93731e-13	1187	COVID-19 severity	G	T	0.3515	0.057196	0.037103	0.1232	1388342	52.1224	0.042132
Thyroid cancer	ieu-a-1082	rs1898422	2	142495019	A	C	0.1705	-0.687762	0.1108	3.50397e-10	1187	COVID-19 severity	A	C	0.1605	0.042563	0.043548	0.3284	1388342	38.5298	0.031491
Thyroid cancer	ieu-a-1082	rs197559	21	19362689	G	T	0.5286	0.493969	0.08473	5.02597e-09	1187	COVID-19 severity	G	T	0.4738	-0.04266	0.026704	0.1101	1388342	33.988	0.027882
Thyroid cancer	ieu-a-1082	rs2011347	2	106907876	G	T	0.6493	0.627547	0.08816	8.28705e-13	1187	COVID-19 severity	G	T	0.5224	-0.026389	0.026858	0.3258	1388342	50.6698	0.041006
Thyroid cancer	ieu-a-1082	rs2026912	10	91212595	A	C	0.09948	-1.08146	0.1473	2.77779e-14	1187	COVID-19 severity	A	C	0.1973	0.0098957	0.046282	0.8307	1388342	53.9033	0.043509
Thyroid cancer	ieu-a-1082	rs2044241	5	112523526	A	C	0.6889	-0.623261	0.09468	3.45621e-11	1187	COVID-19 severity	A	C	0.7498	-0.00046591	0.030371	0.9878	1388342	43.3335	0.035278
Thyroid cancer	ieu-a-1082	rs2121697	2	46709607	C	A	0.387	-0.530858	0.08663	7.77499e-10	1187	COVID-19 severity	C	A	0.4816	0.020874	0.026516	0.4312	1388342	37.5509	0.030715
Thyroid cancer	ieu-a-1082	rs2157787	16	72928928	C	A	0.6058	2.05885	0.09758	1.30017e-108	1187	COVID-19 severity	C	A	0.3324	-0.12926	0.037341	0.000537	1388342	445.172	0.273083
Thyroid cancer	ieu-a-1082	rs2236674	21	45880800	A	C	0.6228	-0.63074	0.08952	1.38899e-12	1187	COVID-19 severity	A	C	0.6793	-0.016863	0.028902	0.5596	1388342	49.6433	0.040209
Thyroid cancer	ieu-a-1082	rs2239214	14	72888427	G	A	0.2728	1.55878	0.1133	1.55418e-47	1187	COVID-19 severity	G	A	0.1121	0.013707	0.056062	0.8068	1388342	189.282	0.137732
Thyroid cancer	ieu-a-1082	rs2250057	9	135775203	A	C	0.407	-1.34861	0.09026	1.62892e-52	1187	COVID-19 severity	A	C	0.6417	-0.029477	0.027195	0.2784	1388342	223.245	0.158527
Thyroid cancer	ieu-a-1082	rs2336409	8	809079	C	A	0.4862	0.586119	0.08502	4.60257e-12	1187	COVID-19 severity	C	A	0.3573	-0.010375	0.03448	0.7635	1388342	47.5258	0.03856
Thyroid cancer	ieu-a-1082	rs2368105	2	181106013	T	G	0.4901	-0.54974	0.08459	7.03234e-11	1187	COVID-19 severity	T	G	0.6101	-0.010264	0.026896	0.7027	1388342	42.2354	0.034415
Thyroid cancer	ieu-a-1082	rs2414003	15	50318197	T	G	0.161	-0.740239	0.1139	4.42385e-11	1187	COVID-19 severity	T	G	0.2882	0.0068558	0.030192	0.8204	1388342	42.2373	0.034417
Thyroid cancer	ieu-a-1082	rs2452477	2	143756755	T	G	0.1425	-0.66456	0.119	1.601e-08	1187	COVID-19 severity	T	G	0.1747	0.015962	0.036673	0.6634	1388342	31.1871	0.025643
Thyroid cancer	ieu-a-1082	rs2484667	10	44172133	C	A	0.4435	0.473747	0.08544	2.65198e-08	1187	COVID-19 severity	C	A	0.3758	-0.041656	0.027158	0.1251	1388342	30.7447	0.025289
Thyroid cancer	ieu-a-1082	rs2566511	7	150703041	T	C	0.1243	-2.49532	0.1819	3.38376e-61	1187	COVID-19 severity	T	C	0.2717	0.021098	0.038755	0.5862	1388342	188.186	0.137043
Thyroid cancer	ieu-a-1082	rs2567501	17	70711674	C	A	0.5235	2.18214	0.09786	9.31108e-122	1187	COVID-19 severity	C	A	0.2763	-0.03007	0.037781	0.4261	1388342	497.227	0.295577
Thyroid cancer	ieu-a-1082	rs2640734	8	27532654	T	C	0.1522	-2.21733	0.1503	1.35207e-63	1187	COVID-19 severity	T	C	0.2218	0.0011032	0.038695	0.9773	1388342	217.642	0.155166
Thyroid cancer	ieu-a-1082	rs2677879	18	2547500	T	G	0.4297	-1.47622	0.0908	2.95393e-62	1187	COVID-19 severity	T	G	0.6102	0.0047287	0.02709	0.8614	1388342	264.32	0.182375
Thyroid cancer	ieu-a-1082	rs2679163	2	232816237	T	G	0.2377	-2.07227	0.1175	3.53834e-82	1187	COVID-19 severity	T	G	0.3627	0.014436	0.034747	0.6778	1388342	311.041	0.207909
Thyroid cancer	ieu-a-1082	rs26887	5	53553740	G	A	0.1822	1.93167	0.1541	3.24116e-44	1187	COVID-19 severity	G	A	0.03464	0.010267	0.067442	0.879	1388342	157.131	0.117075
Thyroid cancer	ieu-a-1082	rs2720392	7	100486035	A	C	0.3642	-0.634312	0.08724	2.71894e-13	1187	COVID-19 severity	A	C	0.4953	0.037813	0.034146	0.2681	1388342	52.8658	0.042707
Thyroid cancer	ieu-a-1082	rs2722633	3	164384338	C	A	0.5178	0.603672	0.08513	1.07399e-12	1187	COVID-19 severity	C	A	0.4632	-0.035499	0.02682	0.1856	1388342	50.2848	0.040707
Thyroid cancer	ieu-a-1082	rs272620	5	63815993	G	T	0.3534	0.532978	0.08958	2.29901e-09	1187	COVID-19 severity	G	T	0.2889	0.015539	0.028846	0.5901	1388342	35.3994	0.029006
Thyroid cancer	ieu-a-1082	rs2802523	13	41025396	C	A	0.5852	1.98268	0.09573	1.07152e-103	1187	COVID-19 severity	C	A	0.3469	-0.011841	0.02829	0.6755	1388342	428.952	0.265778
Thyroid cancer	ieu-a-1082	rs2836836	21	40389491	T	G	0.2611	-2.21183	0.1152	1.50003e-97	1187	COVID-19 severity	T	G	0.456	0.0071138	0.034413	0.8362	1388342	368.637	0.237273
Thyroid cancer	ieu-a-1082	rs28433203	1	46196813	T	G	0.09072	-2.72098	0.2341	1.28086e-49	1187	COVID-19 severity	T	G	0.2544	-0.043342	0.031168	0.1643	1388342	135.098	0.102339
Thyroid cancer	ieu-a-1082	rs2844353	3	37761233	G	T	0.4991	0.565314	0.08457	2.00078e-11	1187	COVID-19 severity	G	T	0.3797	0.060731	0.034506	0.07841	1388342	44.6835	0.036337
Thyroid cancer	ieu-a-1082	rs2866442	4	78558585	G	T	0.7066	1.83822	0.103	5.43125e-79	1187	COVID-19 severity	G	T	0.5351	-0.028216	0.0338	0.4038	1388342	318.508	0.211843
Thyroid cancer	ieu-a-1082	rs2867803	7	75284941	A	C	0.4428	-0.481429	0.08448	1.11199e-08	1187	COVID-19 severity	A	C	0.4694	0.0035247	0.034692	0.9191	1388342	32.4756	0.026675
Thyroid cancer	ieu-a-1082	rs2870132	20	38569980	A	C	0.1934	-0.584113	0.1066	3.39797e-08	1187	COVID-19 severity	A	C	0.2305	0.015009	0.040611	0.7117	1388342	30.0247	0.024711
Thyroid cancer	ieu-a-1082	rs2885280	12	73412222	A	C	0.2278	-0.59602	0.1008	2.65601e-09	1187	COVID-19 severity	A	C	0.2668	-0.054144	0.029627	0.06763	1388342	34.9623	0.028659
Thyroid cancer	ieu-a-1082	rs2973786	5	177725209	T	G	0.4283	-2.04253	0.09622	3.33426e-109	1187	COVID-19 severity	T	G	0.6827	0.090938	0.036961	0.01388	1388342	450.616	0.275502
Thyroid cancer	ieu-a-1082	rs2981073	8	123467576	C	A	0.3802	0.53883	0.08884	1.119e-09	1187	COVID-19 severity	C	A	0.3523	-0.064685	0.037206	0.08211	1388342	36.7863	0.030109
Thyroid cancer	ieu-a-1082	rs30958	16	55278599	G	T	0.7539	0.539397	0.09706	2.31798e-08	1187	COVID-19 severity	G	T	0.7421	-0.015317	0.047448	0.7468	1388342	30.8842	0.025401
Thyroid cancer	ieu-a-1082	rs3101528	8	107658187	G	T	0.7392	2.07545	0.1128	4.04017e-88	1187	COVID-19 severity	G	T	0.5109	-0.044568	0.033909	0.1887	1388342	338.537	0.222205
Thyroid cancer	ieu-a-1082	rs3594	8	30535660	A	C	0.3292	-0.644167	0.08906	3.47136e-13	1187	COVID-19 severity	A	C	0.3986	0.0080476	0.036239	0.8243	1388342	52.3156	0.042282
Thyroid cancer	ieu-a-1082	rs3745720	19	48836082	C	A	0.5349	0.617483	0.08453	2.19079e-13	1187	COVID-19 severity	C	A	0.4219	-0.018564	0.026796	0.4884	1388342	53.3615	0.04309
Thyroid cancer	ieu-a-1082	rs3829647	19	52216563	G	T	0.6535	0.491023	0.08798	2.16202e-08	1187	COVID-19 severity	G	T	0.5481	-0.026982	0.034895	0.4394	1388342	31.1484	0.025612
Thyroid cancer	ieu-a-1082	rs4143816	10	50899856	T	G	0.7455	1.974	0.1095	2.92617e-83	1187	COVID-19 severity	T	G	0.5066	-0.042225	0.026264	0.1079	1388342	324.987	0.215225
Thyroid cancer	ieu-a-1082	rs4148124	21	43698255	C	A	0.6535	0.700978	0.08845	1.50314e-15	1187	COVID-19 severity	C	A	0.5117	-0.027036	0.03395	0.4258	1388342	62.8077	0.050334
Thyroid cancer	ieu-a-1082	rs4233904	2	12037951	C	A	0.7303	0.626049	0.09423	2.25216e-11	1187	COVID-19 severity	C	A	0.6719	0.0021646	0.036616	0.9529	1388342	44.1406	0.035912
Thyroid cancer	ieu-a-1082	rs4269220	4	185259670	G	T	0.5791	0.486458	0.0857	1.253e-08	1187	COVID-19 severity	G	T	0.4517	-0.010015	0.034396	0.7709	1388342	32.2203	0.02647
Thyroid cancer	ieu-a-1082	rs4332846	19	41058802	A	C	0.5443	-0.583332	0.08519	6.21012e-12	1187	COVID-19 severity	A	C	0.6238	0.0086304	0.027475	0.7534	1388342	46.8872	0.038061
Thyroid cancer	ieu-a-1082	rs4336409	5	153093323	T	G	0.3887	-0.500545	0.08621	5.77497e-09	1187	COVID-19 severity	T	G	0.496	-0.0043701	0.0267	0.87	1388342	33.7109	0.027661
Thyroid cancer	ieu-a-1082	rs4648935	1	24466035	T	G	0.3463	-0.689952	0.08918	7.01617e-15	1187	COVID-19 severity	T	G	0.4671	0.025968	0.034236	0.4481	1388342	59.8553	0.048082
Thyroid cancer	ieu-a-1082	rs4658359	1	89847372	T	G	0.8659	2.26433	0.1609	1.39701e-59	1187	COVID-19 severity	T	G	0.7589	-0.016984	0.030188	0.5737	1388342	198.047	0.143196
Thyroid cancer	ieu-a-1082	rs4679695	3	152687097	C	A	0.5666	0.559841	0.085	3.82913e-11	1187	COVID-19 severity	C	A	0.609	0.019691	0.027014	0.466	1388342	43.3802	0.035315
Thyroid cancer	ieu-a-1082	rs4709487	6	161487794	T	G	0.1348	-0.755023	0.1259	1.10999e-09	1187	COVID-19 severity	T	G	0.187	0.026047	0.033513	0.437	1388342	35.9641	0.029455
Thyroid cancer	ieu-a-1082	rs4721443	7	15528256	G	T	0.804	0.685774	0.1056	5.39511e-11	1187	COVID-19 severity	G	T	0.7822	0.0094091	0.039953	0.8138	1388342	42.173	0.034366
Thyroid cancer	ieu-a-1082	rs4760566	12	129200924	C	A	0.8155	0.60991	0.1081	1.25499e-08	1187	COVID-19 severity	C	A	0.7766	0.015422	0.039564	0.6967	1388342	31.8332	0.026161
Thyroid cancer	ieu-a-1082	rs4766901	12	118866406	T	G	0.4843	-0.496923	0.08493	4.44795e-09	1187	COVID-19 severity	T	G	0.478	0.0065207	0.026807	0.8078	1388342	34.2339	0.028078
Thyroid cancer	ieu-a-1082	rs4768352	12	41794490	T	G	0.3316	-0.621199	0.08952	3.04018e-12	1187	COVID-19 severity	T	G	0.4427	-0.0031648	0.033867	0.9255	1388342	48.1528	0.039049
Thyroid cancer	ieu-a-1082	rs4808027	19	16171361	G	T	0.23	0.614645	0.1043	2.88403e-09	1187	COVID-19 severity	G	T	0.1715	0.0064651	0.034241	0.8502	1388342	34.728	0.028472
Thyroid cancer	ieu-a-1082	rs4882110	11	48558249	T	G	0.4655	-0.600386	0.08493	1.2659e-12	1187	COVID-19 severity	T	G	0.5679	-0.010974	0.026639	0.6804	1388342	49.9734	0.040465
Thyroid cancer	ieu-a-1082	rs4884522	13	53053768	A	C	0.5282	0.694548	0.08585	4.19662e-16	1187	COVID-19 severity	A	C	0.4282	-0.055141	0.035043	0.1156	1388342	65.4522	0.052343
Thyroid cancer	ieu-a-1082	rs4886485	15	76531520	C	A	0.4774	0.511026	0.08451	1.29601e-09	1187	COVID-19 severity	C	A	0.4089	-0.00041448	0.035058	0.9906	1388342	36.5654	0.029933
Thyroid cancer	ieu-a-1082	rs4896219	6	137079542	A	C	0.4167	-0.540941	0.08547	2.13201e-10	1187	COVID-19 severity	A	C	0.5128	-0.019739	0.026677	0.4593	1388342	40.0564	0.032698
Thyroid cancer	ieu-a-1082	rs4922081	8	19536790	A	C	0.2111	-2.08586	0.1254	8.20729e-75	1187	COVID-19 severity	A	C	0.3641	-0.051037	0.027087	0.05953	1388342	276.678	0.189288
Thyroid cancer	ieu-a-1082	rs546583	1	57614330	C	A	0.5329	0.562997	0.08451	2.29509e-11	1187	COVID-19 severity	C	A	0.3699	-0.0021887	0.035295	0.9506	1388342	44.3809	0.0361
Thyroid cancer	ieu-a-1082	rs550201	18	43341772	C	A	0.3326	-1.99437	0.1013	4.38531e-96	1187	COVID-19 severity	C	A	0.5593	-0.032076	0.034034	0.3459	1388342	387.608	0.246475
Thyroid cancer	ieu-a-1082	rs5749581	22	33624845	A	C	0.5209	-0.617345	0.08496	2.90469e-13	1187	COVID-19 severity	A	C	0.6382	0.0563	0.034929	0.107	1388342	52.7991	0.042656
Thyroid cancer	ieu-a-1082	rs576070	5	31385490	T	G	0.2377	-2.01741	0.1127	2.06681e-83	1187	COVID-19 severity	T	G	0.5115	0.0032034	0.034743	0.9265	1388342	320.435	0.212852
Thyroid cancer	ieu-a-1082	rs6046115	20	19449317	T	G	0.4625	-0.67119	0.08508	2.23512e-15	1187	COVID-19 severity	T	G	0.5699	0.032799	0.026759	0.2203	1388342	62.2352	0.049899
Thyroid cancer	ieu-a-1082	rs6060124	20	33536897	A	C	0.1651	-0.756513	0.1134	1.35613e-11	1187	COVID-19 severity	A	C	0.2745	0.0033519	0.030623	0.9128	1388342	44.5048	0.036197
Thyroid cancer	ieu-a-1082	rs630573	11	88650737	C	A	0.708	0.604221	0.09198	3.95822e-11	1187	COVID-19 severity	C	A	0.5411	0.063035	0.0267	0.01823	1388342	43.1524	0.035136
Thyroid cancer	ieu-a-1082	rs630695	6	117252759	G	T	0.1366	-0.770244	0.1228	1.87202e-10	1187	COVID-19 severity	G	T	0.2179	0.0083111	0.034027	0.807	1388342	39.3423	0.032133
Thyroid cancer	ieu-a-1082	rs638335	1	78527876	T	G	0.7619	-1.40143	0.1176	1.09396e-35	1187	COVID-19 severity	T	G	0.8891	0.023918	0.040611	0.5559	1388342	142.013	0.107017
Thyroid cancer	ieu-a-1082	rs6430168	2	148121393	G	T	0.7732	0.626424	0.09948	2.223e-10	1187	COVID-19 severity	G	T	0.7576	-0.027778	0.039554	0.4825	1388342	39.652	0.032378
Thyroid cancer	ieu-a-1082	rs6471521	8	96112796	C	A	0.6766	0.535973	0.08988	2.121e-09	1187	COVID-19 severity	C	A	0.5416	-0.045001	0.034081	0.1867	1388342	35.5598	0.029134
Thyroid cancer	ieu-a-1082	rs6478287	9	119947461	G	T	0.6341	2.05338	0.09882	3.80189e-106	1187	COVID-19 severity	G	T	0.4375	-0.017169	0.034387	0.6176	1388342	431.767	0.267056
Thyroid cancer	ieu-a-1082	rs6487825	12	29590845	G	T	0.6451	1.92758	0.09625	1.02802e-97	1187	COVID-19 severity	G	T	0.4229	-0.042209	0.034063	0.2153	1388342	401.073	0.252872
Thyroid cancer	ieu-a-1082	rs6498272	16	12342674	T	G	0.6923	0.604404	0.09119	2.66624e-11	1187	COVID-19 severity	T	G	0.5934	0.033104	0.034695	0.34	1388342	43.9299	0.035746
Thyroid cancer	ieu-a-1082	rs6505863	18	13974987	C	A	0.7157	0.71335	0.09359	1.52195e-14	1187	COVID-19 severity	C	A	0.5519	0.033924	0.03401	0.3185	1388342	58.096	0.046735
Thyroid cancer	ieu-a-1082	rs6516819	21	29510893	G	T	0.5802	0.586088	0.08564	6.35331e-12	1187	COVID-19 severity	G	T	0.4711	-0.0055783	0.034485	0.8715	1388342	46.8352	0.038021
Thyroid cancer	ieu-a-1082	rs6532146	4	90166778	A	C	0.2757	-2.13707	0.1116	2.71269e-95	1187	COVID-19 severity	A	C	0.5155	-0.036221	0.035539	0.3081	1388342	366.698	0.236321
Thyroid cancer	ieu-a-1082	rs6533109	4	104722062	C	A	0.5615	-0.492865	0.0858	8.31706e-09	1187	COVID-19 severity	C	A	0.6163	0.015588	0.034858	0.6547	1388342	32.9975	0.027092
Thyroid cancer	ieu-a-1082	rs6540082	16	87842141	T	G	0.5964	-0.491031	0.08694	1.45201e-08	1187	COVID-19 severity	T	G	0.6259	-0.032939	0.035168	0.3489	1388342	31.8991	0.026213
Thyroid cancer	ieu-a-1082	rs6546667	2	71313262	G	A	0.541	0.694148	0.08459	1.58891e-16	1187	COVID-19 severity	G	A	0.4563	-0.0014788	0.03414	0.9655	1388342	67.3389	0.053771
Thyroid cancer	ieu-a-1082	rs6565631	17	77866952	C	A	0.7751	0.601115	0.09994	1.38899e-09	1187	COVID-19 severity	C	A	0.7633	0.0064845	0.030214	0.8301	1388342	36.1773	0.029625
Thyroid cancer	ieu-a-1082	rs6584869	10	110225049	C	A	0.7131	0.640365	0.09282	3.81681e-12	1187	COVID-19 severity	C	A	0.6901	-0.023527	0.028942	0.4163	1388342	47.5962	0.038615
Thyroid cancer	ieu-a-1082	rs6670601	1	192758615	C	A	0.5611	0.474333	0.08456	1.85699e-08	1187	COVID-19 severity	C	A	0.4287	0.031497	0.026497	0.2346	1388342	31.4657	0.025866
Thyroid cancer	ieu-a-1082	rs678476	1	5347979	A	C	0.321	-0.637902	0.09004	1.02306e-12	1187	COVID-19 severity	A	C	0.4696	-0.066634	0.027049	0.01376	1388342	50.1923	0.040635
Thyroid cancer	ieu-a-1082	rs6793262	3	17923381	G	T	0.5909	1.35712	0.08969	7.56833e-54	1187	COVID-19 severity	G	T	0.457	-0.024749	0.034218	0.4695	1388342	228.954	0.161925
Thyroid cancer	ieu-a-1082	rs6827297	4	135554935	G	T	0.728	0.721547	0.09454	1.38007e-14	1187	COVID-19 severity	G	T	0.698	-0.0261	0.028677	0.3628	1388342	58.2503	0.046853
Thyroid cancer	ieu-a-1082	rs6828245	4	25993373	A	C	0.3991	-0.69535	0.08646	6.04088e-16	1187	COVID-19 severity	A	C	0.4829	0.044376	0.034058	0.1926	1388342	64.681	0.051758
Thyroid cancer	ieu-a-1082	rs6870385	5	27559659	C	A	0.6872	0.501536	0.08994	2.174e-08	1187	COVID-19 severity	C	A	0.6408	0.0096247	0.027496	0.7263	1388342	31.0956	0.02557
Thyroid cancer	ieu-a-1082	rs6937429	6	66021416	G	T	0.6614	0.531369	0.08824	1.48799e-09	1187	COVID-19 severity	G	T	0.5956	-0.010584	0.027468	0.7	1388342	36.2628	0.029693
Thyroid cancer	ieu-a-1082	rs6946868	7	83795479	C	A	0.2749	-2.01741	0.1086	3.50671e-88	1187	COVID-19 severity	C	A	0.5	-0.037517	0.026527	0.1573	1388342	345.087	0.225534
Thyroid cancer	ieu-a-1082	rs6949292	7	16440023	A	C	0.2968	-0.537341	0.09206	4.55198e-09	1187	COVID-19 severity	A	C	0.4012	0.0080755	0.027031	0.7651	1388342	34.0689	0.027947
Thyroid cancer	ieu-a-1082	rs6951443	7	66672143	A	C	0.5835	-0.528273	0.08707	1.13999e-09	1187	COVID-19 severity	A	C	0.5866	0.011732	0.035708	0.7425	1388342	36.8112	0.030128
Thyroid cancer	ieu-a-1082	rs698171	5	127156760	C	A	0.5923	1.91122	0.09431	6.95665e-99	1187	COVID-19 severity	C	A	0.2865	0.03828	0.037711	0.3101	1388342	410.682	0.257371
Thyroid cancer	ieu-a-1082	rs6984781	8	13613335	G	T	0.2732	0.622725	0.09803	1.58701e-10	1187	COVID-19 severity	G	T	0.171	0.014313	0.032433	0.659	1388342	40.3529	0.032932
Thyroid cancer	ieu-a-1082	rs7034893	9	5494438	C	T	0.1582	-1.93033	0.1346	4.67197e-56	1187	COVID-19 severity	C	T	0.2854	0.0010329	0.037541	0.9781	1388342	205.671	0.147893
Thyroid cancer	ieu-a-1082	rs711943	3	135110411	C	A	0.5215	0.461718	0.08438	4.142e-08	1187	COVID-19 severity	C	A	0.5777	-0.069719	0.034408	0.04274	1388342	29.9416	0.024644
Thyroid cancer	ieu-a-1082	rs7186875	16	55883761	C	A	0.7331	0.578391	0.09559	1.16399e-09	1187	COVID-19 severity	C	A	0.7179	-0.0043934	0.03988	0.9123	1388342	36.6116	0.02997
Thyroid cancer	ieu-a-1082	rs7188594	16	83214480	A	C	0.3056	-0.563523	0.09117	5.25497e-10	1187	COVID-19 severity	A	C	0.3858	0.025093	0.034309	0.4646	1388342	38.2049	0.031233
Thyroid cancer	ieu-a-1082	rs7234149	18	31285269	C	A	0.7336	1.91596	0.108	1.02589e-79	1187	COVID-19 severity	C	A	0.5921	0.031168	0.034139	0.3613	1388342	314.721	0.209853
Thyroid cancer	ieu-a-1082	rs7294444	12	13101454	T	G	0.4271	-0.63036	0.08486	8.53493e-14	1187	COVID-19 severity	T	G	0.6144	-0.011387	0.034632	0.7423	1388342	55.1787	0.044493
Thyroid cancer	ieu-a-1082	rs7301555	12	85399747	T	G	0.06687	-3.81263	0.4569	2.86484e-43	1187	COVID-19 severity	T	G	0.1735	0.021698	0.046481	0.6406	1388342	69.6317	0.0555
Thyroid cancer	ieu-a-1082	rs7528076	1	218361784	A	C	0.365	-0.568278	0.08718	5.91834e-11	1187	COVID-19 severity	A	C	0.3651	0.0001025	0.034914	0.9977	1388342	42.4901	0.034615
Thyroid cancer	ieu-a-1082	rs754038	10	71300334	C	A	0.5172	1.29755	0.08914	1.04689e-49	1187	COVID-19 severity	C	A	0.386	0.013806	0.037073	0.7096	1388342	211.886	0.151685
Thyroid cancer	ieu-a-1082	rs7623609	3	133887637	T	G	0.6773	0.492167	0.08971	3.67401e-08	1187	COVID-19 severity	T	G	0.5252	-0.0048806	0.034544	0.8876	1388342	30.0984	0.02477
Thyroid cancer	ieu-a-1082	rs7735978	5	103376332	A	C	0.1176	-2.56525	0.1992	5.06407e-56	1187	COVID-19 severity	A	C	0.2189	-0.011124	0.0331	0.7368	1388342	165.837	0.122766
Thyroid cancer	ieu-a-1082	rs7781839	7	144277757	A	C	0.5728	-0.489193	0.0858	1.06101e-08	1187	COVID-19 severity	A	C	0.5938	-0.01228	0.036403	0.7359	1388342	32.5077	0.0267
Thyroid cancer	ieu-a-1082	rs7823055	8	55511676	T	G	0.3783	-1.84137	0.09437	1.16788e-91	1187	COVID-19 severity	T	G	0.5682	0.051103	0.034586	0.1395	1388342	380.727	0.243163
Thyroid cancer	ieu-a-1082	rs7848973	9	100588839	G	A	0.527	-0.555034	0.08441	4.12477e-11	1187	COVID-19 severity	G	A	0.6042	0.0041422	0.026973	0.878	1388342	43.2366	0.035202
Thyroid cancer	ieu-a-1082	rs7849585	9	139111870	T	G	0.2498	-0.621943	0.09684	9.93802e-11	1187	COVID-19 severity	T	G	0.3265	-0.0041201	0.028263	0.8841	1388342	41.2469	0.033637
Thyroid cancer	ieu-a-1082	rs7858672	9	2224135	G	T	0.6538	0.523911	0.08892	3.36403e-09	1187	COVID-19 severity	G	T	0.481	0.0023511	0.034266	0.9453	1388342	34.7149	0.028462
Thyroid cancer	ieu-a-1082	rs7866443	9	119179876	A	C	0.1795	-0.622689	0.1092	8.72007e-09	1187	COVID-19 severity	A	C	0.237	-0.037412	0.04055	0.3562	1388342	32.516	0.026707
Thyroid cancer	ieu-a-1082	rs7869617	9	113060439	C	A	0.5094	0.47965	0.08421	1.12899e-08	1187	COVID-19 severity	C	A	0.4344	-0.032876	0.026752	0.2191	1388342	32.443	0.026649
Thyroid cancer	ieu-a-1082	rs7904993	10	13863721	C	T	0.2352	1.36226	0.1168	4.46889e-34	1187	COVID-19 severity	C	T	0.1473	0.08209	0.041261	0.04664	1388342	136.03	0.102973
Thyroid cancer	ieu-a-1082	rs7907903	10	1765025	T	G	0.5648	-0.599386	0.08663	3.76964e-12	1187	COVID-19 severity	T	G	0.6528	-0.016729	0.027515	0.5432	1388342	47.8714	0.038829
Thyroid cancer	ieu-a-1082	rs7985861	13	69598658	A	C	0.3475	-0.606236	0.08811	4.70544e-12	1187	COVID-19 severity	A	C	0.3194	-0.01868	0.027622	0.4989	1388342	47.3405	0.038415
Thyroid cancer	ieu-a-1082	rs7998196	13	91515582	G	T	0.6353	-0.657002	0.09026	2.41991e-13	1187	COVID-19 severity	G	T	0.7436	0.046764	0.037766	0.2156	1388342	52.9838	0.042798
Thyroid cancer	ieu-a-1082	rs8007859	14	69704553	T	G	0.6104	0.542144	0.08611	2.651e-10	1187	COVID-19 severity	T	G	0.615	0.030792	0.027254	0.2586	1388342	39.6389	0.032368
Thyroid cancer	ieu-a-1082	rs8019424	14	22491095	G	T	0.5314	0.61804	0.08528	3.3861e-13	1187	COVID-19 severity	G	T	0.5168	0.036061	0.026599	0.1752	1388342	52.5217	0.042441
Thyroid cancer	ieu-a-1082	rs8062459	16	88934674	G	A	0.122	2.82197	0.2692	7.6542e-43	1187	COVID-19 severity	G	A	0.02191	-0.017951	0.084329	0.8314	1388342	109.889	0.084864
Thyroid cancer	ieu-a-1082	rs8076927	17	60171809	G	T	0.5835	0.472567	0.08544	2.94002e-08	1187	COVID-19 severity	G	T	0.5658	0.038555	0.034506	0.2639	1388342	30.5917	0.025166
Thyroid cancer	ieu-a-1082	rs8095811	18	2419068	G	T	0.05434	-2.12528	0.2471	6.03532e-24	1187	COVID-19 severity	G	T	0.1353	0.028484	0.039366	0.4693	1388342	73.9753	0.058758
Thyroid cancer	ieu-a-1082	rs825770	5	138115219	G	T	0.7904	0.599111	0.1021	3.378e-09	1187	COVID-19 severity	G	T	0.7009	-0.023196	0.039018	0.5522	1388342	34.4321	0.028236
Thyroid cancer	ieu-a-1082	rs886856	20	52556084	G	T	0.2842	-0.567572	0.09254	7.01197e-10	1187	COVID-19 severity	G	T	0.3646	0.015586	0.036693	0.671	1388342	37.6169	0.030768
Thyroid cancer	ieu-a-1082	rs895649	11	119751585	G	A	0.3754	1.18111	0.0962	3.95913e-36	1187	COVID-19 severity	G	A	0.444	0.036033	0.034381	0.2946	1388342	150.741	0.112852
Thyroid cancer	ieu-a-1082	rs9289086	3	117425366	C	A	0.3285	0.65959	0.09295	8.93923e-13	1187	COVID-19 severity	C	A	0.1944	-0.046555	0.040186	0.2467	1388342	50.3558	0.040762
Thyroid cancer	ieu-a-1082	rs9290550	3	175096546	T	G	0.25	-0.603489	0.09614	2.64801e-10	1187	COVID-19 severity	T	G	0.3321	0.060694	0.037569	0.1062	1388342	39.4031	0.032181
Thyroid cancer	ieu-a-1082	rs9294379	6	88152535	A	C	0.74	2.1698	0.1138	8.12082e-96	1187	COVID-19 severity	A	C	0.5569	-0.044231	0.026648	0.09695	1388342	363.542	0.234764
Thyroid cancer	ieu-a-1082	rs9297398	8	108647423	C	A	0.2131	-2.01741	0.1195	1.45111e-75	1187	COVID-19 severity	C	A	0.3882	0.080449	0.036004	0.02545	1388342	285.005	0.19388
Thyroid cancer	ieu-a-1082	rs929958	4	37769060	A	C	0.4672	-0.474494	0.08412	1.55901e-08	1187	COVID-19 severity	A	C	0.5678	-0.00051948	0.034316	0.9879	1388342	31.8173	0.026148
Thyroid cancer	ieu-a-1082	rs9325969	22	49215103	T	G	0.4614	-0.501536	0.08487	3.11903e-09	1187	COVID-19 severity	T	G	0.5785	0.016674	0.034149	0.6254	1388342	34.9217	0.028626
Thyroid cancer	ieu-a-1082	rs9344740	6	88619412	T	G	0.5823	-0.581657	0.08668	1.60214e-11	1187	COVID-19 severity	T	G	0.6933	-0.030325	0.037067	0.4133	1388342	45.0294	0.036608
Thyroid cancer	ieu-a-1082	rs9350030	6	17122836	G	T	0.3271	0.604316	0.09255	5.19159e-11	1187	COVID-19 severity	G	T	0.2167	0.069669	0.039107	0.07483	1388342	42.6359	0.03473
Thyroid cancer	ieu-a-1082	rs935990	11	133089795	C	A	0.6852	0.733761	0.09027	2.55682e-16	1187	COVID-19 severity	C	A	0.5741	0.015291	0.036336	0.6739	1388342	66.0727	0.052813
Thyroid cancer	ieu-a-1082	rs9386492	6	106368709	A	C	0.3493	-0.481591	0.08765	3.57602e-08	1187	COVID-19 severity	A	C	0.4465	0.011482	0.026776	0.6681	1388342	30.1893	0.024843
Thyroid cancer	ieu-a-1082	rs9406232	6	9079324	A	C	0.3315	-0.529159	0.08864	2.05698e-09	1187	COVID-19 severity	A	C	0.3514	-0.0064684	0.03457	0.8516	1388342	35.638	0.029196
Thyroid cancer	ieu-a-1082	rs9464641	6	14038947	G	T	0.1779	2.08989	0.1644	2.32006e-47	1187	COVID-19 severity	G	T	0.04066	0.033222	0.06464	0.6073	1388342	161.601	0.120006
Thyroid cancer	ieu-a-1082	rs950275	10	49897219	A	C	0.2718	-0.869407	0.09534	2.64789e-20	1187	COVID-19 severity	A	C	0.2739	-0.0020867	0.0285	0.9416	1388342	83.1565	0.065573
Thyroid cancer	ieu-a-1082	rs9516234	13	94100353	C	A	0.7173	0.654504	0.09342	1.72982e-12	1187	COVID-19 severity	C	A	0.6578	0.011933	0.02743	0.6635	1388342	49.0846	0.039774
Thyroid cancer	ieu-a-1082	rs9537154	13	56100889	A	C	0.2007	-0.578569	0.1041	2.20201e-08	1187	COVID-19 severity	A	C	0.2562	-0.031001	0.030218	0.3049	1388342	30.8894	0.025405
Thyroid cancer	ieu-a-1082	rs9547491	13	36947826	G	T	0.6858	0.543693	0.0897	1.15499e-09	1187	COVID-19 severity	G	T	0.6463	-0.0054651	0.036289	0.8803	1388342	36.7386	0.030071
Thyroid cancer	ieu-a-1082	rs9558058	13	104012768	T	G	0.1105	-2.65073	0.2053	4.12572e-58	1187	COVID-19 severity	T	G	0.2997	0.031166	0.050744	0.5391	1388342	166.707	0.123331
Thyroid cancer	ieu-a-1082	rs9655048	7	5167160	A	C	0.3583	-0.594026	0.08777	1.05196e-11	1187	COVID-19 severity	A	C	0.4251	0.0010052	0.034549	0.9768	1388342	45.8056	0.037216
Thyroid cancer	ieu-a-1082	rs971732	2	50142117	C	A	0.2351	-2.13877	0.1195	1.0639e-85	1187	COVID-19 severity	C	A	0.3706	0.021678	0.027116	0.424	1388342	320.326	0.212795
Thyroid cancer	ieu-a-1082	rs9824256	3	113815108	C	A	0.6534	0.507498	0.08745	5.77697e-09	1187	COVID-19 severity	C	A	0.6438	-0.02638	0.027188	0.3319	1388342	33.6782	0.027635
Thyroid cancer	ieu-a-1082	rs9869760	3	119233558	A	C	0.2937	-2.0526	0.1062	8.74178e-95	1187	COVID-19 severity	A	C	0.5842	0.042498	0.026828	0.1132	1388342	373.559	0.239682
Thyroid cancer	ieu-a-1082	rs9889777	17	49336793	C	A	0.6923	0.514834	0.09111	1.39901e-08	1187	COVID-19 severity	C	A	0.5703	0.054404	0.035653	0.127	1388342	31.9303	0.026238
Thyroid cancer	ieu-a-1082	rs9988716	10	82715404	A	C	0.1627	-0.673737	0.113	1.639e-09	1187	COVID-19 severity	A	C	0.2411	-0.011599	0.032848	0.724	1388342	35.5487	0.029125
Ovarian cancer	ieu-a-1120	rs10962691	9	16915105	G	C	0.2026	-0.2133	0.01698	1.72783e-36	66450	COVID-19 severity	G	C	0.2002	-0.038441	0.033968	0.2578	1388342	157.8	0.002369
Ovarian cancer	ieu-a-1120	rs115478735	9	136149711	T	A	0.1936	0.09941	0.01672	2.80098e-09	66450	COVID-19 severity	T	A	0.1941	0.19155	0.042464	6.459e-06	1388342	35.3499	0.000532
Ovarian cancer	ieu-a-1120	rs11782652	8	82653644	G	A	0.06811	0.1524	0.02508	1.25101e-09	66450	COVID-19 severity	G	A	0.06349	-0.069025	0.051822	0.1829	1388342	36.9245	0.000555
Ovarian cancer	ieu-a-1120	rs12952824	17	46478195	A	C	0.2171	0.1033	0.0157	4.91021e-11	66450	COVID-19 severity	A	C	0.2277	0.031278	0.032257	0.3322	1388342	43.2914	0.000651
Ovarian cancer	ieu-a-1120	rs4808075	19	17390291	C	T	0.296	0.1224	0.01437	1.53886e-17	66450	COVID-19 severity	C	T	0.2978	-0.0031827	0.029603	0.9144	1388342	72.552	0.001091
Ovarian cancer	ieu-a-1120	rs62276619	3	156397692	T	C	0.04882	0.37	0.0284	5.53478e-39	66450	COVID-19 severity	T	C	0.056	0.0088063	0.06787	0.8968	1388342	169.733	0.002548
Ovarian cancer	ieu-a-1120	rs6496746	15	91532869	A	C	0.1762	-0.095	0.01735	4.18398e-08	66450	COVID-19 severity	A	C	0.1746	0.014639	0.03446	0.671	1388342	29.9811	0.000451
Ovarian cancer	ieu-a-1120	rs7084454	10	21821274	A	G	0.3279	0.08833	0.01395	2.40802e-10	66450	COVID-19 severity	A	G	0.3206	0.023425	0.027505	0.3944	1388342	40.093	0.000603
Ovarian cancer	ieu-a-1120	rs71238846	17	43552537	A	G	0.1825	0.1269	0.01693	6.59022e-14	66450	COVID-19 severity	A	G	0.1404	-0.067314	0.033711	0.04585	1388342	56.1836	0.000845
Melanoma	ieu-b-4969	rs11120349	1	214718513	T	A	0.20584	-0.00165893	0.000285342	6.1e-09	375767	COVID-19 severity	T	A	0.2049	-0.085361	0.039904	0.03242	1388342	33.8006	8.99e-05
Melanoma	ieu-b-4969	rs1126809	11	89017961	A	G	0.302059	0.00203828	0.000250011	3.59998e-16	375767	COVID-19 severity	A	G	0.2544	-0.059886	0.030222	0.04753	1388342	66.4675	0.000177
Melanoma	ieu-b-4969	rs183783391	3	69950451	T	C	0.013683	0.00693872	0.0010097	6.29941e-12	375767	COVID-19 severity	T	C	0.009328	-0.17008	0.17057	0.3187	1388342	47.2252	0.000126
Melanoma	ieu-b-4969	rs6059655	20	32665748	G	A	0.898713	-0.00383327	0.000386784	3.69999e-23	375767	COVID-19 severity	G	A	0.9299	-0.17034	0.079589	0.03233	1388342	98.2204	0.000261
Melanoma	ieu-b-4969	rs74415461	16	89990843	T	C	0.084956	0.00387347	0.000413323	7.10068e-21	375767	COVID-19 severity	T	C	0.07762	-0.038706	0.057496	0.5008	1388342	87.8256	0.000234
Melanoma	ieu-b-4969	rs871024	9	21803880	A	C	0.519167	-0.00189312	0.000229871	1.80011e-16	375767	COVID-19 severity	A	C	0.5216	0.021028	0.034161	0.5382	1388342	67.8247	0.00018
Small bowel cancer	ukb-a-56	rs113335353	3	78658935	A	G	0.0394025	0.000763737	0.0001376	2.85213e-08	337159	COVID-19 severity	A	G	0.03605	0.030317	0.079473	0.7029	1388342	30.8071	9.14e-05
Small bowel cancer	ukb-a-56	rs143507767	2	128434467	G	A	0.0087263	0.0018184	0.000295414	7.49653e-10	337159	COVID-19 severity	G	A	0.01658	0.073199	0.16707	0.6613	1388342	37.8893	0.000112
Small bowel cancer	ukb-a-56	rs145192708	6	86605453	G	T	0.0103396	0.00145705	0.00026503	3.8507e-08	337159	COVID-19 severity	G	T	0.01013	0.065093	0.2214	0.7687	1388342	30.2245	8.96e-05
Small bowel cancer	ukb-a-56	rs147636075	2	101734199	G	C	0.0215511	0.00103181	0.000189198	4.93856e-08	337159	COVID-19 severity	G	C	0.02234	0.060245	0.15917	0.7051	1388342	29.7417	8.82e-05
Small bowel cancer	ukb-a-56	rs77933629	9	113137872	T	C	0.0348044	0.000827805	0.000143209	7.45968e-09	337159	COVID-19 severity	T	C	0.03306	0.15011	0.074349	0.04348	1388342	33.413	9.91e-05
Colorectal cancer	ieu-b-4965	rs114717436	3	28450527	G	A	0.010823	0.00795214	0.00139467	1.2e-08	377673	COVID-19 severity	G	A	0.007227	0.10867	0.13949	0.4359	1388342	32.5106	8.61e-05
Colorectal cancer	ieu-b-4965	rs12135286	1	222218761	T	C	0.193449	0.00203311	0.000354166	9.40005e-09	377673	COVID-19 severity	T	C	0.2098	0.01603	0.034042	0.6377	1388342	32.954	8.72e-05
Colorectal cancer	ieu-b-4965	rs16892766	8	117630683	C	A	0.079541	0.00305526	0.000516081	3.2e-09	377673	COVID-19 severity	C	A	0.09157	-0.032461	0.050548	0.5208	1388342	35.0478	9.28e-05
Colorectal cancer	ieu-b-4965	rs3087967	11	111156836	C	T	0.69919	-0.00207534	0.000305631	1.10002e-11	377673	COVID-19 severity	C	T	0.7241	-0.018708	0.038497	0.627	1388342	46.1088	0.000122
Colorectal cancer	ieu-b-4965	rs58658771	15	33001734	A	T	0.180335	0.00280944	0.000364099	1.20005e-14	377673	COVID-19 severity	A	T	0.2091	-0.03365	0.034222	0.3255	1388342	59.5389	0.000158
Colorectal cancer	ieu-b-4965	rs6983267	8	128413305	T	G	0.482388	-0.0026797	0.00027963	9.3994e-22	377673	COVID-19 severity	T	G	0.4814	0.0018223	0.026424	0.945	1388342	91.8343	0.000243
Colorectal cancer	ieu-b-4965	rs72746180	5	40240420	C	A	0.298345	0.00170489	0.000305954	2.5e-08	377673	COVID-19 severity	C	A	0.2711	-0.0038748	0.029312	0.8948	1388342	31.0513	8.22e-05
Squamous cell lung cancer	ieu-a-967	rs27996	5	1345474	G	A	0.419351	-0.165813	0.024244	1.84001e-08	18313	COVID-19 severity	G	A	0.442	0.0018188	0.026731	0.9458	1388342	46.7766	0.002548
Squamous cell lung cancer	ieu-a-967	rs501942	6	31840477	T	C	0.108039	0.262723	0.056353	6.74e-09	18313	COVID-19 severity	T	C	0.1115	-0.026377	0.046408	0.5698	1388342	21.7351	0.001186
Oropharyngeal cancer	ieu-b-4968	rs117554022	9	7309731	G	C	0.030036	0.0015421	0.000255911	1.7e-09	372510	COVID-19 severity	G	C	0.02513	-0.075522	0.1134	0.5054	1388342	36.3117	9.75e-05
Oropharyngeal cancer	ieu-b-4968	rs586610	6	32572311	C	T	0.303991	0.000547998	9.4417e-05	6.49995e-09	372510	COVID-19 severity	C	T	0.2684	-0.030338	0.039983	0.448	1388342	33.6866	9.04e-05
Lymphoma	ukb-d-C_LYMPHOMA	rs4713570	6	0.000184386	T	C	0.268475	0.00142862	0.000184386	9.36052e-15	361194	COVID-19 severity	T	C	0.2683	-0.023162	0.041354	0.5754	1388342	60.0313	0.000166
Lymphoma	ukb-d-C_LYMPHOMA	rs59065116	11	0.000200998	TA	T	0.210445	0.00115534	0.000200998	9.03649e-09	361194	COVID-19 severity	TA	T	0.2152	-0.015186	0.042593	0.7214	1388342	33.0397	9.15e-05
Cervix cancer	ukb-b-918	rs4713462	6	31347816	A	G	0.260802	-0.00124106	0.000194121	1.6e-10	463010	COVID-19 severity	A	G	0.3096	-0.0069249	0.019827	0.7269	1388342	40.8734	8.83e-05
Cervix cancer	ukb-b-918	rs9272226	6	32602396	T	C	0.631131	-0.00155897	0.000173586	2.70023e-19	463010	COVID-19 severity	T	C	0.6304	0.055953	0.019678	0.004463	1388342	80.6578	0.000174

## Sheet: Table S2B
exposure	id.exposure	SNP	chr.exposure	pos.exposure	effect_allele.exposure	other_allele.exposure	eaf.exposure	beta.exposure	se.exposure	pval.exposure	samplesize.exposure	outcome	effect_allele.outcome	other_allele.outcome	eaf.outcome	beta.outcome	se.outcome	pval.outcome	samplesize.outcome	F	R2
Overall cancer	ukb-a-307	rs1126809	11	89017961	A	G	0.304801	0.0042007	0.000714901	4.20911e-09	336272	COVID-19 hospitalization	A	G	0.267	-0.023381	0.020514	0.2544	1887658	34.5264	0.000103
Overall cancer	ukb-a-307	rs2981575	10	123346116	A	G	0.60559	-0.00463491	0.000672203	5.39138e-12	336272	COVID-19 hospitalization	A	G	0.5894	0.0088406	0.020489	0.6661	1887658	47.5425	0.000141
Overall cancer	ukb-a-307	rs3769823	2	202122995	G	A	0.718859	-0.00442606	0.000730123	1.34527e-09	336272	COVID-19 hospitalization	G	A	0.696	-0.010309	0.019787	0.6024	1887658	36.7487	0.000109
Overall cancer	ukb-a-307	rs8051733	16	90024206	G	A	0.347009	0.00458229	0.000691248	3.38454e-11	336272	COVID-19 hospitalization	G	A	0.3234	-0.014126	0.022362	0.5276	1887658	43.9438	0.000131
Lung cancer	ieu-a-966	rs37004	5	1356684	T	C	0.226187	-0.17209	0.019417	3.19007e-13	27209	COVID-19 hospitalization	T	C	0.2266	0.013709	0.021827	0.53	1887658	78.5501	0.002879
Lung cancer	ieu-a-966	rs446975	3	9217383	T	G	0.115137	-0.261532	0.022649	6.41948e-18	27209	COVID-19 hospitalization	T	G	0.1393	-0.013404	0.027448	0.6253	1887658	133.337	0.004877
Lung cancer	ieu-a-966	rs501942	6	31840477	T	C	0.108859	0.186841	0.034137	1.47001e-10	27209	COVID-19 hospitalization	T	C	0.1068	-0.0091571	0.031071	0.7682	1887658	29.9567	0.0011
Lung cancer	ieu-a-966	rs8040868	15	78911181	C	T	0.424371	0.301974	0.024535	4.9705e-60	27209	COVID-19 hospitalization	C	T	0.3912	0.024102	0.018625	0.1957	1887658	151.484	0.005537
Squamous cell lung cancer	ieu-a-967	rs27996	5	1345474	G	A	0.419351	-0.165813	0.024244	1.84001e-08	18313	COVID-19 hospitalization	G	A	0.4401	0.0061013	0.018437	0.7407	1887658	46.7766	0.002548
Squamous cell lung cancer	ieu-a-967	rs501942	6	31840477	T	C	0.108039	0.262723	0.056353	6.74e-09	18313	COVID-19 hospitalization	T	C	0.1068	-0.0091571	0.031071	0.7682	1887658	21.7351	0.001186
Breast cancer	ieu-a-1126	rs10022462	4	89243818	T	C	0.4379	0.0375	0.0062	1.554e-09	228951	COVID-19 hospitalization	T	C	0.4411	-0.016954	0.018492	0.3592	1887658	36.583	0.00016
Breast cancer	ieu-a-1126	rs10096351	8	128372172	G	A	0.5441	0.1055	0.0062	1.96607e-64	228951	COVID-19 hospitalization	G	A	0.5473	0.0077718	0.018543	0.6751	1887658	289.549	0.001263
Breast cancer	ieu-a-1126	rs10760444	9	129396434	A	G	0.5667	-0.0358	0.0062	9.05607e-09	228951	COVID-19 hospitalization	A	G	0.5519	0.044514	0.020073	0.02658	1887658	33.3413	0.000146
Breast cancer	ieu-a-1126	rs10885405	10	114777670	T	C	0.46	0.0465	0.0062	5.43626e-14	228951	COVID-19 hospitalization	T	C	0.4594	-0.031906	0.018342	0.08194	1887658	56.25	0.000246
Breast cancer	ieu-a-1126	rs10941679	5	44706498	G	A	0.2522	0.1278	0.0071	5.6079e-73	228951	COVID-19 hospitalization	G	A	0.2583	0.011254	0.024233	0.6424	1887658	324	0.001413
Breast cancer	ieu-a-1126	rs10995201	10	64299890	G	A	0.1591	-0.1317	0.0087	1.55704e-51	228951	COVID-19 hospitalization	G	A	0.1712	-0.041853	0.028767	0.1457	1887658	229.157	0.001
Breast cancer	ieu-a-1126	rs11117758	1	217220574	A	G	0.2086	-0.0449	0.0076	3.90301e-09	228951	COVID-19 hospitalization	A	G	0.2008	0.020732	0.025608	0.4182	1887658	34.9032	0.000152
Breast cancer	ieu-a-1126	rs11205303	1	149906413	C	T	0.3998	0.0497	0.0064	1.13894e-14	228951	COVID-19 hospitalization	C	T	0.3837	0.050795	0.018983	0.007454	1887658	60.3049	0.000263
Breast cancer	ieu-a-1126	rs1121948	8	129165056	G	A	0.1963	0.0575	0.0077	7.4817e-14	228951	COVID-19 hospitalization	G	A	0.1872	-0.0047938	0.022586	0.8319	1887658	55.764	0.000244
Breast cancer	ieu-a-1126	rs11462858	10	123093991	GT	G	0.3215	-0.0471	0.0067	2.08593e-12	228951	COVID-19 hospitalization	GT	G	0.3389	-0.019261	0.02286	0.3995	1887658	49.4188	0.000216
Breast cancer	ieu-a-1126	rs11583393	1	88429024	A	C	0.249	-0.0396	0.0072	3.61102e-08	228951	COVID-19 hospitalization	A	C	0.2687	-0.058428	0.021689	0.007062	1887658	30.25	0.000132
Breast cancer	ieu-a-1126	rs11624333	14	68979835	C	T	0.2595	-0.0968	0.0071	6.5013e-42	228951	COVID-19 hospitalization	C	T	0.2641	-0.0065151	0.023535	0.7819	1887658	185.881	0.000811
Breast cancer	ieu-a-1126	rs11672660	19	46180184	T	C	0.213	0.0472	0.008	4.12601e-09	228951	COVID-19 hospitalization	T	C	0.2241	-0.01196	0.022849	0.6007	1887658	34.81	0.000152
Breast cancer	ieu-a-1126	rs11684853	2	19310918	T	G	0.5606	-0.0442	0.0062	1.11712e-12	228951	COVID-19 hospitalization	T	G	0.5657	-0.00077841	0.018555	0.9665	1887658	50.8231	0.000222
Breast cancer	ieu-a-1126	rs117618124	18	29977689	C	T	0.0453	-0.1074	0.0156	5.45758e-12	228951	COVID-19 hospitalization	C	T	0.06359	0.029985	0.045899	0.5136	1887658	47.3979	0.000207
Breast cancer	ieu-a-1126	rs117737783	11	69079744	A	G	0.0728	0.0747	0.0127	4.03097e-09	228951	COVID-19 hospitalization	A	G	0.08786	-0.058872	0.041573	0.1567	1887658	34.5966	0.000151
Breast cancer	ieu-a-1126	rs11822830	11	129461016	G	A	0.5959	0.0483	0.0063	1.9829e-14	228951	COVID-19 hospitalization	G	A	0.6085	-0.0073479	0.018736	0.6949	1887658	58.7778	0.000257
Breast cancer	ieu-a-1126	rs11903787	2	121088182	A	G	0.2405	-0.0451	0.0076	2.36401e-09	228951	COVID-19 hospitalization	A	G	0.2236	-0.0064096	0.02539	0.8007	1887658	35.2149	0.000154
Breast cancer	ieu-a-1126	rs11977670	7	139942304	A	G	0.4315	0.0522	0.0063	1.04809e-16	228951	COVID-19 hospitalization	A	G	0.4068	-0.011717	0.018195	0.5196	1887658	68.6531	0.0003
Breast cancer	ieu-a-1126	rs12207986	6	81094287	A	G	0.5362	0.0375	0.0062	1.45001e-09	228951	COVID-19 hospitalization	A	G	0.5414	-0.020722	0.018385	0.2597	1887658	36.583	0.00016
Breast cancer	ieu-a-1126	rs12250948	10	115128491	C	T	0.7844	-0.0576	0.0074	1.0361e-14	228951	COVID-19 hospitalization	C	T	0.7719	0.030156	0.025029	0.2283	1887658	60.5873	0.000265
Breast cancer	ieu-a-1126	rs1230666	1	114173410	G	A	0.8721	-0.0592	0.0095	3.86696e-10	228951	COVID-19 hospitalization	G	A	0.8373	0.0027213	0.030126	0.928	1887658	38.8326	0.00017
Breast cancer	ieu-a-1126	rs12479355	2	227226952	G	A	0.2088	-0.0426	0.0076	2.35798e-08	228951	COVID-19 hospitalization	G	A	0.196	-0.012174	0.022205	0.5835	1887658	31.419	0.000137
Breast cancer	ieu-a-1126	rs12487185	3	30677269	G	A	0.3128	0.045	0.0066	1.20587e-11	228951	COVID-19 hospitalization	G	A	0.3277	-0.018572	0.019646	0.3445	1887658	46.4876	0.000203
Breast cancer	ieu-a-1126	rs12513872	5	1248354	A	G	0.7485	0.0413	0.0073	1.464e-08	228951	COVID-19 hospitalization	A	G	0.7489	-0.0059589	0.024628	0.8088	1887658	32.0077	0.00014
Breast cancer	ieu-a-1126	rs12519859	5	32581186	A	G	0.4748	0.0365	0.0063	5.76806e-09	228951	COVID-19 hospitalization	A	G	0.4753	-0.002033	0.019072	0.9151	1887658	33.5664	0.000147
Breast cancer	ieu-a-1126	rs12546444	8	106358620	T	A	0.1001	-0.0717	0.011	7.45418e-11	228951	COVID-19 hospitalization	T	A	0.1039	0.031696	0.034791	0.3623	1887658	42.4867	0.000186
Breast cancer	ieu-a-1126	rs1268974	10	80852378	G	A	0.6132	-0.0793	0.0063	3.71022e-36	228951	COVID-19 hospitalization	G	A	0.6365	-0.01933	0.020723	0.3509	1887658	158.44	0.000692
Breast cancer	ieu-a-1126	rs12990503	2	218294217	G	C	0.7372	-0.073	0.007	9.99079e-26	228951	COVID-19 hospitalization	G	C	0.7267	-0.0044235	0.020584	0.8298	1887658	108.755	0.000475
Breast cancer	ieu-a-1126	rs13066793	3	87037543	G	A	0.0925	-0.0685	0.0112	1.037e-09	228951	COVID-19 hospitalization	G	A	0.1013	0.020325	0.032427	0.5308	1887658	37.4063	0.000163
Breast cancer	ieu-a-1126	rs13267382	8	117209548	G	A	0.6493	-0.0437	0.0065	1.59514e-11	228951	COVID-19 hospitalization	G	A	0.6248	-0.020146	0.021793	0.3552	1887658	45.1998	0.000197
Breast cancer	ieu-a-1126	rs1498608	5	58343067	A	T	0.0949	-0.0671	0.0107	3.48097e-10	228951	COVID-19 hospitalization	A	T	0.0904	-0.014956	0.031046	0.63	1887658	39.3258	0.000172
Breast cancer	ieu-a-1126	rs1685191	19	44283232	T	C	0.5647	-0.0586	0.0064	3.87436e-20	228951	COVID-19 hospitalization	T	C	0.5616	-0.007196	0.021515	0.738	1887658	83.8369	0.000366
Breast cancer	ieu-a-1126	rs16991615	20	5948227	A	G	0.0626	0.0758	0.0126	1.91699e-09	228951	COVID-19 hospitalization	A	G	0.05911	0.070598	0.036519	0.05322	1887658	36.1907	0.000158
Breast cancer	ieu-a-1126	rs17185310	1	118195592	A	G	0.3034	0.0395	0.0069	8.70102e-09	228951	COVID-19 hospitalization	A	G	0.2912	0.018895	0.023142	0.4142	1887658	32.7715	0.000143
Breast cancer	ieu-a-1126	rs17268829	7	94113799	C	T	0.2804	0.0495	0.0068	4.48952e-13	228951	COVID-19 hospitalization	C	T	0.2795	-0.010323	0.020008	0.6059	1887658	52.9898	0.000231
Breast cancer	ieu-a-1126	rs17426269	1	88156923	A	G	0.1488	0.0487	0.0086	1.74201e-08	228951	COVID-19 hospitalization	A	G	0.1368	0.027641	0.029196	0.3438	1887658	32.0672	0.00014
Breast cancer	ieu-a-1126	rs1973765	11	1898664	C	T	0.4001	-0.0817	0.0064	9.7051e-38	228951	COVID-19 hospitalization	C	T	0.4024	0.022419	0.020935	0.2842	1887658	162.961	0.000711
Breast cancer	ieu-a-1126	rs1985742	9	21961227	T	A	0.3516	0.0588	0.0065	8.09655e-20	228951	COVID-19 hospitalization	T	A	0.3488	0.0037067	0.021091	0.8605	1887658	81.8329	0.000357
Breast cancer	ieu-a-1126	rs2016394	2	172972971	A	G	0.4748	-0.0425	0.0062	6.23448e-12	228951	COVID-19 hospitalization	A	G	0.4847	-0.012561	0.020586	0.5418	1887658	46.9888	0.000205
Breast cancer	ieu-a-1126	rs2253012	14	37228504	T	C	0.4318	0.0433	0.0065	3.1268e-11	228951	COVID-19 hospitalization	T	C	0.4378	0.026468	0.021262	0.2132	1887658	44.3761	0.000194
Breast cancer	ieu-a-1126	rs2747652	6	152437016	C	T	0.5263	0.0663	0.0062	1.30707e-26	228951	COVID-19 hospitalization	C	T	0.5685	-0.0022347	0.018885	0.9058	1887658	114.352	0.000499
Breast cancer	ieu-a-1126	rs28512361	22	46283297	A	G	0.1127	0.0611	0.0109	2.249e-08	228951	COVID-19 hospitalization	A	G	0.1142	-0.008156	0.034658	0.814	1887658	31.4217	0.000137
Breast cancer	ieu-a-1126	rs2853669	5	1295349	G	A	0.3061	-0.0651	0.0069	4.04669e-21	228951	COVID-19 hospitalization	G	A	0.2808	-0.0027132	0.019851	0.8913	1887658	89.0151	0.000389
Breast cancer	ieu-a-1126	rs2992756	1	18807339	C	T	0.5194	-0.0506	0.0063	1.60398e-15	228951	COVID-19 hospitalization	C	T	0.512	-0.014678	0.018248	0.4212	1887658	64.5089	0.000282
Breast cancer	ieu-a-1126	rs34195518	10	9084428	CT	C	0.1207	0.0611	0.0096	2.014e-10	228951	COVID-19 hospitalization	CT	C	0.1178	-0.0036089	0.032292	0.911	1887658	40.5079	0.000177
Breast cancer	ieu-a-1126	rs35383942	1	201437832	T	C	0.0562	0.101	0.0139	3.79315e-13	228951	COVID-19 hospitalization	T	C	0.07232	-0.031908	0.04347	0.4629	1887658	52.7975	0.000231
Breast cancer	ieu-a-1126	rs3769821	2	202123430	T	C	0.6683	-0.0565	0.0065	3.96917e-18	228951	COVID-19 hospitalization	T	C	0.6598	-0.011735	0.019146	0.5399	1887658	75.5562	0.00033
Breast cancer	ieu-a-1126	rs3821902	3	63941697	G	T	0.1358	0.0623	0.0089	2.9902e-12	228951	COVID-19 hospitalization	G	T	0.1183	0.0050738	0.026059	0.8456	1887658	49	0.000214
Breast cancer	ieu-a-1126	rs3903072	11	65583066	T	G	0.4727	-0.0434	0.0062	2.25424e-12	228951	COVID-19 hospitalization	T	G	0.4712	-0.03569	0.018106	0.0487	1887658	49	0.000214
Breast cancer	ieu-a-1126	rs4081859	5	81466669	A	G	0.7517	0.0521	0.0073	7.0762e-13	228951	COVID-19 hospitalization	A	G	0.7599	-0.033246	0.021777	0.1269	1887658	50.9366	0.000222
Breast cancer	ieu-a-1126	rs4233486	1	41380440	T	C	0.6514	0.0396	0.0069	9.08511e-09	228951	COVID-19 hospitalization	T	C	0.6661	0.0093767	0.021276	0.6594	1887658	32.9376	0.000144
Breast cancer	ieu-a-1126	rs4286946	8	36849946	G	C	0.1739	-0.0799	0.0083	8.62581e-22	228951	COVID-19 hospitalization	G	C	0.1684	-0.0050623	0.024192	0.8342	1887658	92.6696	0.000405
Breast cancer	ieu-a-1126	rs4442975	2	217920769	T	G	0.5021	-0.1274	0.0061	1.13999e-95	228951	COVID-19 hospitalization	T	G	0.5052	0.015718	0.020955	0.4532	1887658	436.193	0.001902
Breast cancer	ieu-a-1126	rs4496150	16	87085237	A	C	0.2466	-0.0416	0.0072	8.09096e-09	228951	COVID-19 hospitalization	A	C	0.2468	-0.012848	0.022914	0.575	1887658	33.3827	0.000146
Breast cancer	ieu-a-1126	rs4562056	5	169591487	T	G	0.3323	0.0416	0.0067	4.719e-10	228951	COVID-19 hospitalization	T	G	0.3102	0.015008	0.019932	0.4515	1887658	38.5511	0.000168
Breast cancer	ieu-a-1126	rs4702131	5	16233619	C	T	0.5612	-0.0424	0.0062	1.00207e-11	228951	COVID-19 hospitalization	C	T	0.5726	-0.022028	0.020499	0.2826	1887658	46.768	0.000204
Breast cancer	ieu-a-1126	rs4784227	16	52599188	T	C	0.2387	0.2153	0.0071	1e-200	228951	COVID-19 hospitalization	T	C	0.2406	-0.012128	0.020986	0.5633	1887658	919.542	0.004
Breast cancer	ieu-a-1126	rs4820318	22	38570313	A	G	0.3753	-0.0475	0.0064	1.02991e-13	228951	COVID-19 hospitalization	A	G	0.3722	0.0010498	0.01887	0.9556	1887658	55.0842	0.000241
Breast cancer	ieu-a-1126	rs4848599	2	121239360	C	T	0.8845	0.0933	0.01	1.58489e-20	228951	COVID-19 hospitalization	C	T	0.891	0.032485	0.034246	0.3428	1887658	87.0489	0.00038
Breast cancer	ieu-a-1126	rs4971059	1	155148781	A	G	0.3632	0.0424	0.0064	4.82503e-11	228951	COVID-19 hospitalization	A	G	0.3891	-0.0016368	0.021898	0.9404	1887658	43.8906	0.000192
Breast cancer	ieu-a-1126	rs527616	18	24337424	G	C	0.6211	0.0499	0.0064	6.70039e-15	228951	COVID-19 hospitalization	G	C	0.5935	-0.006603	0.021683	0.7607	1887658	60.7913	0.000265
Breast cancer	ieu-a-1126	rs56387622	3	46888198	C	T	0.1012	-0.0942	0.0106	5.46512e-19	228951	COVID-19 hospitalization	C	T	0.09871	-0.0075867	0.029192	0.7949	1887658	78.9751	0.000345
Breast cancer	ieu-a-1126	rs56971155	16	53862888	T	C	0.3934	-0.0424	0.0064	3.62577e-11	228951	COVID-19 hospitalization	T	C	0.3476	-0.0035204	0.021304	0.8687	1887658	43.8906	0.000192
Breast cancer	ieu-a-1126	rs57212245	11	69280923	A	G	0.0783	-0.0652	0.0119	4.08903e-08	228951	COVID-19 hospitalization	A	G	0.08062	0.031255	0.03955	0.4294	1887658	30.0193	0.000131
Breast cancer	ieu-a-1126	rs58058861	3	172285237	A	G	0.2172	0.0474	0.0074	1.907e-10	228951	COVID-19 hospitalization	A	G	0.2432	0.017901	0.023183	0.44	1887658	41.0292	0.000179
Breast cancer	ieu-a-1126	rs5995875	22	40960692	T	C	0.1068	0.1206	0.0098	9.03858e-35	228951	COVID-19 hospitalization	T	C	0.1248	0.027311	0.029874	0.3606	1887658	151.441	0.000661
Breast cancer	ieu-a-1126	rs5997389	22	29134719	A	G	0.0903	0.0791	0.0108	2.19079e-13	228951	COVID-19 hospitalization	A	G	0.118	-0.073197	0.03367	0.02971	1887658	53.6421	0.000234
Breast cancer	ieu-a-1126	rs6122906	20	48945911	G	A	0.1816	0.0507	0.008	2.44698e-10	228951	COVID-19 hospitalization	G	A	0.1851	-0.011026	0.026369	0.6758	1887658	40.1639	0.000175
Breast cancer	ieu-a-1126	rs62048402	16	53803223	A	G	0.4156	-0.0624	0.0063	3.50026e-23	228951	COVID-19 hospitalization	A	G	0.4191	0.017287	0.018487	0.3497	1887658	98.1043	0.000428
Breast cancer	ieu-a-1126	rs62331150	4	106069013	T	G	0.2263	0.0494	0.0074	1.84714e-11	228951	COVID-19 hospitalization	T	G	0.2274	-0.050416	0.026091	0.05332	1887658	44.5646	0.000195
Breast cancer	ieu-a-1126	rs62355901	5	56053535	C	T	0.1602	0.1734	0.0082	3.41979e-98	228951	COVID-19 hospitalization	C	T	0.1699	0.021396	0.027249	0.4323	1887658	447.168	0.001949
Breast cancer	ieu-a-1126	rs630965	9	110885479	T	C	0.6196	0.0992	0.0064	3.20701e-54	228951	COVID-19 hospitalization	T	C	0.6329	0.0065426	0.018854	0.7286	1887658	240.25	0.001048
Breast cancer	ieu-a-1126	rs6472903	8	76230301	T	G	0.8261	0.0778	0.0083	4.43302e-21	228951	COVID-19 hospitalization	T	G	0.8139	0.028326	0.024346	0.2447	1887658	87.8624	0.000384
Breast cancer	ieu-a-1126	rs6562760	13	73957681	G	A	0.766	0.0443	0.0073	1.493e-09	228951	COVID-19 hospitalization	G	A	0.7841	-0.016393	0.020999	0.435	1887658	36.8266	0.000161
Breast cancer	ieu-a-1126	rs6569648	6	130349119	T	C	0.7643	0.0512	0.0073	2.97577e-12	228951	COVID-19 hospitalization	T	C	0.7602	-0.01008	0.021322	0.6364	1887658	49.192	0.000215
Breast cancer	ieu-a-1126	rs6596100	5	132407058	T	C	0.2427	-0.0439	0.0076	7.74194e-09	228951	COVID-19 hospitalization	T	C	0.2672	0.020079	0.021752	0.356	1887658	33.3658	0.000146
Breast cancer	ieu-a-1126	rs6597981	11	803017	G	A	0.5178	0.0439	0.0062	1.34586e-12	228951	COVID-19 hospitalization	G	A	0.5533	0.0042842	0.020284	0.8327	1887658	50.1355	0.000219
Breast cancer	ieu-a-1126	rs66572733	10	22047015	G	C	0.037	0.095	0.0162	4.74198e-09	228951	COVID-19 hospitalization	G	C	0.03775	0.092166	0.046912	0.04945	1887658	34.3888	0.00015
Breast cancer	ieu-a-1126	rs6725517	2	25129473	G	A	0.4088	-0.0468	0.0067	2.93022e-12	228951	COVID-19 hospitalization	G	A	0.402	-0.021954	0.018447	0.234	1887658	48.7913	0.000213
Breast cancer	ieu-a-1126	rs6787391	3	4728574	T	C	0.3807	0.0567	0.0064	9.07403e-19	228951	COVID-19 hospitalization	T	C	0.402	-0.041871	0.021538	0.05189	1887658	78.4885	0.000343
Breast cancer	ieu-a-1126	rs68056147	7	130674481	A	G	0.299	0.0501	0.0069	5.36043e-13	228951	COVID-19 hospitalization	A	G	0.2846	-0.0020531	0.023241	0.9296	1887658	52.7202	0.00023
Breast cancer	ieu-a-1126	rs6815814	4	38816338	C	A	0.2525	0.052	0.0072	6.13056e-13	228951	COVID-19 hospitalization	C	A	0.2206	0.064815	0.023386	0.005581	1887658	52.1605	0.000228
Breast cancer	ieu-a-1126	rs6882649	5	111217786	T	G	0.6651	0.0388	0.0066	3.67198e-09	228951	COVID-19 hospitalization	T	G	0.6502	-0.037829	0.023315	0.1047	1887658	34.5601	0.000151
Breast cancer	ieu-a-1126	rs7072776	10	22032942	G	A	0.7124	-0.0618	0.0068	1.74904e-19	228951	COVID-19 hospitalization	G	A	0.7317	-0.0077413	0.020545	0.7063	1887658	82.596	0.000361
Breast cancer	ieu-a-1126	rs7149262	14	37136545	A	C	0.2113	-0.0724	0.0076	2.47116e-21	228951	COVID-19 hospitalization	A	C	0.2109	0.0073949	0.023111	0.749	1887658	90.7507	0.000396
Breast cancer	ieu-a-1126	rs7223535	17	29211667	A	G	0.268	-0.0439	0.007	3.52899e-10	228951	COVID-19 hospitalization	A	G	0.2711	0.0043306	0.020892	0.8358	1887658	39.3308	0.000172
Breast cancer	ieu-a-1126	rs7258465	19	18533642	C	T	0.3436	-0.0725	0.0066	2.78869e-28	228951	COVID-19 hospitalization	C	T	0.3514	0.023802	0.021881	0.2767	1887658	120.667	0.000527
Breast cancer	ieu-a-1126	rs72658071	8	76305785	T	A	0.0877	0.1182	0.0107	2.57988e-28	228951	COVID-19 hospitalization	T	A	0.07224	0.022762	0.031252	0.4664	1887658	122.03	0.000533
Breast cancer	ieu-a-1126	rs72725173	14	68509589	A	G	0.1578	0.0559	0.0085	3.87525e-11	228951	COVID-19 hospitalization	A	G	0.1433	-0.0018772	0.024563	0.9391	1887658	43.25	0.000189
Breast cancer	ieu-a-1126	rs72755295	1	242034263	G	A	0.0309	0.1376	0.0179	1.64589e-14	228951	COVID-19 hospitalization	G	A	0.03613	-0.031072	0.054579	0.5691	1887658	59.0923	0.000258
Breast cancer	ieu-a-1126	rs73949122	2	121157485	G	C	0.1664	-0.0593	0.0084	1.84587e-12	228951	COVID-19 hospitalization	G	C	0.1794	-0.007317	0.024513	0.7653	1887658	49.8369	0.000218
Breast cancer	ieu-a-1126	rs7500067	16	80648296	G	A	0.2293	0.0785	0.0073	4.06443e-27	228951	COVID-19 hospitalization	G	A	0.23	-0.016629	0.021305	0.4351	1887658	115.636	0.000505
Breast cancer	ieu-a-1126	rs7626742	3	27268398	T	G	0.5327	0.1046	0.0062	1.61213e-63	228951	COVID-19 hospitalization	T	G	0.539	0.022412	0.018421	0.2237	1887658	284.63	0.001242
Breast cancer	ieu-a-1126	rs7650602	3	141147414	C	T	0.4422	0.0489	0.0063	6.22444e-15	228951	COVID-19 hospitalization	C	T	0.4469	-0.034929	0.021509	0.1044	1887658	60.2472	0.000263
Breast cancer	ieu-a-1126	rs76956704	6	152031496	T	C	0.03	0.1352	0.0182	1.27087e-13	228951	COVID-19 hospitalization	T	C	0.03534	0.041705	0.058133	0.4731	1887658	55.1837	0.000241
Breast cancer	ieu-a-1126	rs7697216	4	175828036	C	T	0.8819	0.1039	0.0098	1.6099e-26	228951	COVID-19 hospitalization	C	T	0.871	-0.055581	0.027997	0.04712	1887658	112.403	0.000491
Breast cancer	ieu-a-1126	rs77528541	4	126843504	T	G	0.1361	-0.0583	0.0096	1.414e-09	228951	COVID-19 hospitalization	T	G	0.1358	-0.057997	0.032606	0.07529	1887658	36.8803	0.000161
Breast cancer	ieu-a-1126	rs78440108	14	93070286	T	C	0.1718	-0.0595	0.0084	1.61808e-12	228951	COVID-19 hospitalization	T	C	0.1636	-0.0075777	0.026449	0.7745	1887658	50.1736	0.000219
Breast cancer	ieu-a-1126	rs78540526	11	69331418	T	C	0.0756	0.2758	0.0113	1.81134e-131	228951	COVID-19 hospitalization	T	C	0.08481	-0.006073	0.035879	0.8656	1887658	595.706	0.002595
Breast cancer	ieu-a-1126	rs7904249	10	80887337	A	G	0.1592	0.0764	0.0084	6.98072e-20	228951	COVID-19 hospitalization	A	G	0.1595	-0.044067	0.024911	0.0769	1887658	82.7234	0.000361
Breast cancer	ieu-a-1126	rs7971	7	21940960	G	A	0.3531	-0.0365	0.0065	1.93099e-08	228951	COVID-19 hospitalization	G	A	0.3454	-0.040212	0.019055	0.03483	1887658	31.5325	0.000138
Breast cancer	ieu-a-1126	rs9361840	6	82254932	G	A	0.2368	0.0541	0.0072	7.13839e-14	228951	COVID-19 hospitalization	G	A	0.2449	0.0075523	0.021665	0.7274	1887658	56.4585	0.000247
Breast cancer	ieu-a-1126	rs941764	14	91841069	G	A	0.3429	0.0463	0.0065	8.20729e-13	228951	COVID-19 hospitalization	G	A	0.3297	0.012266	0.019082	0.5204	1887658	50.7382	0.000222
Breast cancer	ieu-a-1126	rs9693444	8	29509616	C	A	0.6757	-0.0626	0.0066	1.59993e-21	228951	COVID-19 hospitalization	C	A	0.6791	0.0097648	0.019874	0.6232	1887658	89.9624	0.000393
Breast cancer	ieu-a-1126	rs9833888	3	99723580	T	G	0.2259	0.0457	0.0074	5.15098e-10	228951	COVID-19 hospitalization	T	G	0.228	0.0091567	0.021875	0.6755	1887658	38.139	0.000167
ER+ breast cancer	ieu-a-1127	rs10423928	19	46182304	A	T	0.2138	0.0557	0.0095	5.09096e-09	175475	COVID-19 hospitalization	A	T	0.224	-0.013885	0.022832	0.5431	1887658	34.3766	0.000196
ER+ breast cancer	ieu-a-1127	rs10828249	10	21824727	A	G	0.358	0.0726	0.0077	6.72357e-21	175475	COVID-19 hospitalization	A	G	0.3355	0.0097103	0.018912	0.6076	1887658	88.898	0.000506
ER+ breast cancer	ieu-a-1127	rs10896047	11	65572431	A	G	0.4858	-0.0493	0.0074	2.319e-11	175475	COVID-19 hospitalization	A	G	0.4885	-0.041106	0.021245	0.05301	1887658	44.3844	0.000253
ER+ breast cancer	ieu-a-1127	rs10941679	5	44706498	G	A	0.2511	0.1563	0.0084	8.26799e-78	175475	COVID-19 hospitalization	G	A	0.2583	0.011254	0.024233	0.6424	1887658	346.226	0.001969
ER+ breast cancer	ieu-a-1127	rs10995201	10	64299890	G	A	0.1591	-0.1379	0.0105	1.11506e-39	175475	COVID-19 hospitalization	G	A	0.1712	-0.041853	0.028767	0.1457	1887658	172.484	0.000982
ER+ breast cancer	ieu-a-1127	rs11117758	1	217220574	A	G	0.2082	-0.05	0.0091	4.06004e-08	175475	COVID-19 hospitalization	A	G	0.2008	0.020732	0.025608	0.4182	1887658	30.1896	0.000172
ER+ breast cancer	ieu-a-1127	rs11133838	5	16254310	G	A	0.5841	-0.0415	0.0075	2.82898e-08	175475	COVID-19 hospitalization	G	A	0.5895	-0.01015	0.018545	0.5842	1887658	30.6178	0.000174
ER+ breast cancer	ieu-a-1127	rs11624164	14	68986157	T	C	0.2552	-0.1037	0.0086	1.38484e-33	175475	COVID-19 hospitalization	T	C	0.2689	-0.0021502	0.023399	0.9268	1887658	145.399	0.000828
ER+ breast cancer	ieu-a-1127	rs11822830	11	129461016	G	A	0.5961	0.0445	0.0075	3.33204e-09	175475	COVID-19 hospitalization	G	A	0.6085	-0.0073479	0.018736	0.6949	1887658	35.2044	0.000201
ER+ breast cancer	ieu-a-1127	rs12550713	8	128370949	G	C	0.3991	0.1093	0.0075	2.9902e-48	175475	COVID-19 hospitalization	G	C	0.3936	0.003162	0.018727	0.8659	1887658	212.382	0.001209
ER+ breast cancer	ieu-a-1127	rs12703654	7	139954640	A	C	0.4491	0.0587	0.0077	3.10313e-14	175475	COVID-19 hospitalization	A	C	0.4255	-0.034712	0.021874	0.1125	1887658	58.1159	0.000331
ER+ breast cancer	ieu-a-1127	rs12711947	2	121244272	C	T	0.8983	0.0864	0.0124	3.41271e-12	175475	COVID-19 hospitalization	C	T	0.9083	0.024258	0.035289	0.4918	1887658	48.5494	0.000277
ER+ breast cancer	ieu-a-1127	rs12769650	10	115153192	A	G	0.1276	0.0746	0.011	1.10002e-11	175475	COVID-19 hospitalization	A	G	0.1325	-0.049878	0.026793	0.06266	1887658	45.9931	0.000262
ER+ breast cancer	ieu-a-1127	rs13267382	8	117209548	G	A	0.6478	-0.0427	0.0077	2.93299e-08	175475	COVID-19 hospitalization	G	A	0.6248	-0.020146	0.021793	0.3552	1887658	30.7521	0.000175
ER+ breast cancer	ieu-a-1127	rs1361549	6	82287685	A	G	0.4191	-0.0451	0.0075	1.55901e-09	175475	COVID-19 hospitalization	A	G	0.4287	0.0067734	0.018642	0.7163	1887658	36.1602	0.000206
ER+ breast cancer	ieu-a-1127	rs143048713	3	46893173	GGT	G	0.104	-0.0999	0.0126	2.44512e-15	175475	COVID-19 hospitalization	GGT	G	0.09986	-0.033986	0.034231	0.3208	1887658	62.8622	0.000358
ER+ breast cancer	ieu-a-1127	rs1432679	5	158244083	T	C	0.5669	-0.0695	0.0074	5.77431e-21	175475	COVID-19 hospitalization	T	C	0.5854	0.0033136	0.019046	0.8619	1887658	88.2076	0.000502
ER+ breast cancer	ieu-a-1127	rs151309152	10	123234980	A	C	0.0275	0.1492	0.0224	2.98401e-11	175475	COVID-19 hospitalization	A	C	0.03695	0.030246	0.074625	0.6852	1887658	44.3651	0.000253
ER+ breast cancer	ieu-a-1127	rs1685191	19	44283232	T	C	0.5677	-0.0635	0.0077	1.523e-16	175475	COVID-19 hospitalization	T	C	0.5616	-0.007196	0.021515	0.738	1887658	68.0089	0.000387
ER+ breast cancer	ieu-a-1127	rs16857609	2	218296508	T	C	0.2621	0.0721	0.0083	3.43005e-18	175475	COVID-19 hospitalization	T	C	0.2718	-0.0065368	0.021253	0.7584	1887658	75.4596	0.00043
ER+ breast cancer	ieu-a-1127	rs16867692	8	102430331	G	A	0.197	0.0576	0.0096	2.09899e-09	175475	COVID-19 hospitalization	G	A	0.2052	-0.01123	0.025627	0.6612	1887658	36	0.000205
ER+ breast cancer	ieu-a-1127	rs17035305	1	10616505	A	C	0.3146	-0.0436	0.0079	4.14601e-08	175475	COVID-19 hospitalization	A	C	0.3251	0.012394	0.020241	0.5403	1887658	30.4592	0.000174
ER+ breast cancer	ieu-a-1127	rs17268829	7	94113799	C	T	0.2796	0.0517	0.0082	2.40099e-10	175475	COVID-19 hospitalization	C	T	0.2795	-0.010323	0.020008	0.6059	1887658	39.7515	0.000226
ER+ breast cancer	ieu-a-1127	rs17426269	1	88156923	A	G	0.1488	0.0576	0.0103	1.88499e-08	175475	COVID-19 hospitalization	A	G	0.1368	0.027641	0.029196	0.3438	1887658	31.2731	0.000178
ER+ breast cancer	ieu-a-1127	rs17617028	4	106064683	A	G	0.2265	0.0569	0.0087	7.64364e-11	175475	COVID-19 hospitalization	A	G	0.2288	-0.071317	0.023019	0.001948	1887658	42.7746	0.000244
ER+ breast cancer	ieu-a-1127	rs17838698	3	30684907	T	C	0.2978	0.0624	0.008	5.78362e-15	175475	COVID-19 hospitalization	T	C	0.3145	-0.018961	0.019897	0.3406	1887658	60.84	0.000347
ER+ breast cancer	ieu-a-1127	rs1812715	17	53174966	G	A	0.6943	0.0908	0.0081	2.66379e-29	175475	COVID-19 hospitalization	G	A	0.6976	0.0062165	0.020483	0.7615	1887658	125.661	0.000716
ER+ breast cancer	ieu-a-1127	rs2016394	2	172972971	A	G	0.4753	-0.0603	0.0074	3.21884e-16	175475	COVID-19 hospitalization	A	G	0.4847	-0.012561	0.020586	0.5418	1887658	66.4005	0.000378
ER+ breast cancer	ieu-a-1127	rs2253012	14	37228504	T	C	0.432	0.0511	0.0078	5.19159e-11	175475	COVID-19 hospitalization	T	C	0.4378	0.026468	0.021262	0.2132	1887658	42.9193	0.000245
ER+ breast cancer	ieu-a-1127	rs2461201	10	123799214	T	C	0.3483	0.0473	0.0078	1.67201e-09	175475	COVID-19 hospitalization	T	C	0.3414	-0.010822	0.021426	0.6135	1887658	36.7733	0.00021
ER+ breast cancer	ieu-a-1127	rs28649231	14	68423215	A	G	0.1907	0.0651	0.0095	8.80035e-12	175475	COVID-19 hospitalization	A	G	0.1896	0.0086289	0.026254	0.7424	1887658	46.9586	0.000268
ER+ breast cancer	ieu-a-1127	rs2957449	8	106357736	C	T	0.5331	0.0475	0.0076	5.23697e-10	175475	COVID-19 hospitalization	C	T	0.5662	-0.010114	0.018907	0.5927	1887658	39.0625	0.000223
ER+ breast cancer	ieu-a-1127	rs2992756	1	18807339	C	T	0.5202	-0.0608	0.0076	9.92659e-16	175475	COVID-19 hospitalization	C	T	0.512	-0.014678	0.018248	0.4212	1887658	64	0.000365
ER+ breast cancer	ieu-a-1127	rs310302	8	23647494	A	G	0.4023	0.0444	0.0075	3.63103e-09	175475	COVID-19 hospitalization	A	G	0.4111	0.030368	0.020744	0.1432	1887658	35.0464	0.0002
ER+ breast cancer	ieu-a-1127	rs3217992	9	22003223	T	C	0.3749	-0.0576	0.0076	4.59621e-14	175475	COVID-19 hospitalization	T	C	0.3707	0.0088739	0.018709	0.6353	1887658	57.4404	0.000327
ER+ breast cancer	ieu-a-1127	rs34196306	6	27425644	C	G	0.0833	-0.0889	0.015	2.99399e-09	175475	COVID-19 hospitalization	C	G	0.07899	0.022767	0.040451	0.5736	1887658	35.1254	0.0002
ER+ breast cancer	ieu-a-1127	rs35273427	1	120436751	C	T	0.0599	0.0937	0.016	4.87001e-09	175475	COVID-19 hospitalization	C	T	0.05824	0.011138	0.044719	0.8033	1887658	34.2957	0.000195
ER+ breast cancer	ieu-a-1127	rs35383942	1	201437832	T	C	0.0561	0.0918	0.0164	2.33297e-08	175475	COVID-19 hospitalization	T	C	0.07232	-0.031908	0.04347	0.4629	1887658	31.3327	0.000179
ER+ breast cancer	ieu-a-1127	rs3769821	2	202123430	T	C	0.6678	-0.0545	0.0078	2.09411e-12	175475	COVID-19 hospitalization	T	C	0.6598	-0.011735	0.019146	0.5399	1887658	48.8207	0.000278
ER+ breast cancer	ieu-a-1127	rs3821902	3	63941697	G	T	0.1357	0.0589	0.0106	3.179e-08	175475	COVID-19 hospitalization	G	T	0.1183	0.0050738	0.026059	0.8456	1887658	30.8758	0.000176
ER+ breast cancer	ieu-a-1127	rs4286946	8	36849946	G	C	0.1742	-0.0748	0.0099	4.90569e-14	175475	COVID-19 hospitalization	G	C	0.1684	-0.0050623	0.024192	0.8342	1887658	57.0864	0.000325
ER+ breast cancer	ieu-a-1127	rs4442975	2	217920769	T	G	0.5018	-0.1482	0.0073	6.64967e-91	175475	COVID-19 hospitalization	T	G	0.5052	0.015718	0.020955	0.4532	1887658	412.146	0.002343
ER+ breast cancer	ieu-a-1127	rs4703870	5	81492643	A	G	0.7537	0.0613	0.0088	3.31818e-12	175475	COVID-19 hospitalization	A	G	0.7609	-0.033975	0.021816	0.1194	1887658	48.5239	0.000276
ER+ breast cancer	ieu-a-1127	rs4784227	16	52599188	T	C	0.2385	0.2296	0.0084	3.92645e-164	175475	COVID-19 hospitalization	T	C	0.2406	-0.012128	0.020986	0.5633	1887658	747.111	0.00424
ER+ breast cancer	ieu-a-1127	rs4820318	22	38570313	A	G	0.3749	-0.0632	0.0076	1.10306e-16	175475	COVID-19 hospitalization	A	G	0.3722	0.0010498	0.01887	0.9556	1887658	69.1524	0.000394
ER+ breast cancer	ieu-a-1127	rs4894562	3	172283173	A	G	0.2171	0.0519	0.0089	4.57004e-09	175475	COVID-19 hospitalization	A	G	0.2434	0.018337	0.026153	0.4832	1887658	34.0059	0.000194
ER+ breast cancer	ieu-a-1127	rs490706	3	27330615	A	G	0.5247	0.1148	0.0074	3.27869e-54	175475	COVID-19 hospitalization	A	G	0.53	0.020644	0.018396	0.2618	1887658	240.669	0.00137
ER+ breast cancer	ieu-a-1127	rs4971059	1	155148781	A	G	0.3636	0.0519	0.0077	1.26503e-11	175475	COVID-19 hospitalization	A	G	0.3891	-0.0016368	0.021898	0.9404	1887658	45.4311	0.000259
ER+ breast cancer	ieu-a-1127	rs4980029	10	80886726	G	A	0.163	0.0759	0.0098	1.24108e-14	175475	COVID-19 hospitalization	G	A	0.17	-0.03129	0.027118	0.2486	1887658	59.9834	0.000342
ER+ breast cancer	ieu-a-1127	rs527616	18	24337424	G	C	0.6202	0.0515	0.0076	1.37404e-11	175475	COVID-19 hospitalization	G	C	0.5935	-0.006603	0.021683	0.7607	1887658	45.9185	0.000262
ER+ breast cancer	ieu-a-1127	rs56083805	5	132442263	C	T	0.2422	-0.0595	0.0091	7.00487e-11	175475	COVID-19 hospitalization	C	T	0.2669	0.01757	0.021833	0.421	1887658	42.7515	0.000244
ER+ breast cancer	ieu-a-1127	rs5997389	22	29134719	A	G	0.0901	0.0882	0.0128	6.23161e-12	175475	COVID-19 hospitalization	A	G	0.118	-0.073197	0.03367	0.02971	1887658	47.4807	0.000271
ER+ breast cancer	ieu-a-1127	rs6062356	20	62879331	G	T	0.1493	0.0564	0.0103	4.12895e-08	175475	COVID-19 hospitalization	G	T	0.1491	-0.030645	0.024779	0.2162	1887658	29.9836	0.000171
ER+ breast cancer	ieu-a-1127	rs62048402	16	53803223	A	G	0.4164	-0.0593	0.0075	2.15675e-15	175475	COVID-19 hospitalization	A	G	0.4191	0.017287	0.018487	0.3497	1887658	62.5154	0.000356
ER+ breast cancer	ieu-a-1127	rs62247166	3	71532738	T	C	0.475	-0.0406	0.0074	3.91598e-08	175475	COVID-19 hospitalization	T	C	0.475	0.023486	0.020735	0.2574	1887658	30.1015	0.000172
ER+ breast cancer	ieu-a-1127	rs62355902	5	56053723	T	A	0.1587	0.2032	0.0098	2.88005e-96	175475	COVID-19 hospitalization	T	A	0.1673	0.026302	0.024728	0.2875	1887658	429.928	0.002444
ER+ breast cancer	ieu-a-1127	rs6472903	8	76230301	T	G	0.8265	0.0784	0.0099	2.01002e-15	175475	COVID-19 hospitalization	T	G	0.8139	0.028326	0.024346	0.2447	1887658	62.7136	0.000357
ER+ breast cancer	ieu-a-1127	rs6762558	3	4742251	G	A	0.3868	0.0618	0.0076	3.1798e-16	175475	COVID-19 hospitalization	G	A	0.4102	-0.042458	0.019018	0.02558	1887658	66.1226	0.000377
ER+ breast cancer	ieu-a-1127	rs6815814	4	38816338	C	A	0.2543	0.055	0.0086	1.59302e-10	175475	COVID-19 hospitalization	C	A	0.2206	0.064815	0.023386	0.005581	1887658	40.9005	0.000233
ER+ breast cancer	ieu-a-1127	rs6904031	6	152055978	T	A	0.0647	0.1107	0.0148	6.66807e-14	175475	COVID-19 hospitalization	T	A	0.08359	0.035957	0.038245	0.3471	1887658	55.9464	0.000319
ER+ breast cancer	ieu-a-1127	rs7017073	8	129204262	C	T	0.2114	0.0628	0.0089	1.77215e-12	175475	COVID-19 hospitalization	C	T	0.207	-0.0068216	0.02146	0.7506	1887658	49.7897	0.000284
ER+ breast cancer	ieu-a-1127	rs7149262	14	37136545	A	C	0.2113	-0.0804	0.0091	1.45412e-18	175475	COVID-19 hospitalization	A	C	0.2109	0.0073949	0.023111	0.749	1887658	78.0601	0.000445
ER+ breast cancer	ieu-a-1127	rs7153397	14	91742924	T	C	0.6952	0.0536	0.0081	3.3597e-11	175475	COVID-19 hospitalization	T	C	0.699	0.012588	0.022638	0.5782	1887658	43.7884	0.000249
ER+ breast cancer	ieu-a-1127	rs7223535	17	29211667	A	G	0.268	-0.0463	0.0084	3.19602e-08	175475	COVID-19 hospitalization	A	G	0.2711	0.0043306	0.020892	0.8358	1887658	30.3811	0.000173
ER+ breast cancer	ieu-a-1127	rs72658071	8	76305785	T	A	0.0873	0.1187	0.0128	1.37214e-20	175475	COVID-19 hospitalization	T	A	0.07224	0.022762	0.031252	0.4664	1887658	85.9966	0.00049
ER+ breast cancer	ieu-a-1127	rs72755295	1	242034263	G	A	0.0311	0.1481	0.0208	1.08293e-12	175475	COVID-19 hospitalization	G	A	0.03613	-0.031072	0.054579	0.5691	1887658	50.6971	0.000289
ER+ breast cancer	ieu-a-1127	rs7280197	21	16415732	C	T	0.3778	0.0461	0.0082	1.69899e-08	175475	COVID-19 hospitalization	C	T	0.3716	-0.014553	0.020975	0.4878	1887658	31.6063	0.00018
ER+ breast cancer	ieu-a-1127	rs73169065	22	41009707	T	A	0.1073	0.1108	0.0117	2.03704e-21	175475	COVID-19 hospitalization	T	A	0.1069	0.034699	0.030855	0.2608	1887658	89.6825	0.000511
ER+ breast cancer	ieu-a-1127	rs7463114	8	29507094	C	T	0.6757	-0.0684	0.0078	2.43501e-18	175475	COVID-19 hospitalization	C	T	0.6786	0.0036104	0.020048	0.8571	1887658	76.8994	0.000438
ER+ breast cancer	ieu-a-1127	rs7500067	16	80648296	G	A	0.2301	0.0819	0.0086	2.25892e-21	175475	COVID-19 hospitalization	G	A	0.23	-0.016629	0.021305	0.4351	1887658	90.6924	0.000517
ER+ breast cancer	ieu-a-1127	rs7650602	3	141147414	C	T	0.4421	0.0571	0.0075	2.26882e-14	175475	COVID-19 hospitalization	C	T	0.4469	-0.034929	0.021509	0.1044	1887658	57.9628	0.00033
ER+ breast cancer	ieu-a-1127	rs7697216	4	175828036	C	T	0.882	0.1338	0.0118	6.06317e-30	175475	COVID-19 hospitalization	C	T	0.871	-0.055581	0.027997	0.04712	1887658	128.573	0.000732
ER+ breast cancer	ieu-a-1127	rs7729559	5	169568846	T	C	0.2217	0.057	0.0088	9.31108e-11	175475	COVID-19 hospitalization	T	C	0.2091	-0.0016761	0.021721	0.9385	1887658	41.9551	0.000239
ER+ breast cancer	ieu-a-1127	rs78029804	15	91538920	T	C	0.134	-0.076	0.011	4.56983e-12	175475	COVID-19 hospitalization	T	C	0.1459	-0.0078425	0.027661	0.7768	1887658	47.7355	0.000272
ER+ breast cancer	ieu-a-1127	rs78540526	11	69331418	T	C	0.0759	0.3277	0.0132	1.02094e-136	175475	COVID-19 hospitalization	T	C	0.08481	-0.006073	0.035879	0.8656	1887658	616.318	0.0035
ER+ breast cancer	ieu-a-1127	rs7862747	9	110892899	A	C	0.6224	0.1237	0.0077	3.35738e-58	175475	COVID-19 hospitalization	A	C	0.6334	0.013157	0.020917	0.5294	1887658	258.082	0.001469
ER+ breast cancer	ieu-a-1127	rs8105994	19	18593553	C	T	0.3454	-0.0768	0.0078	8.65167e-23	175475	COVID-19 hospitalization	C	T	0.3528	0.033686	0.019358	0.08184	1887658	96.9467	0.000552
ER+ breast cancer	ieu-a-1127	rs811458	9	119405271	C	T	0.6879	0.0511	0.008	1.72401e-10	175475	COVID-19 hospitalization	C	T	0.7168	0.0064654	0.019609	0.7416	1887658	40.8002	0.000232
ER+ breast cancer	ieu-a-1127	rs9421410	10	123095209	A	G	0.3274	-0.0599	0.008	6.03115e-14	175475	COVID-19 hospitalization	A	G	0.3472	-0.017331	0.022885	0.4489	1887658	56.0627	0.000319
ER- breast cancer	ieu-a-1128	rs10069690	5	1279790	T	C	0.2601	0.1613	0.013	1.53993e-35	127442	COVID-19 hospitalization	T	C	0.2698	-0.022978	0.020674	0.2664	1887658	153.951	0.001207
ER- breast cancer	ieu-a-1128	rs10096351	8	128372172	G	A	0.5455	0.07	0.0114	7.14398e-10	127442	COVID-19 hospitalization	G	A	0.5473	0.0077718	0.018543	0.6751	1887658	37.7039	0.000296
ER- breast cancer	ieu-a-1128	rs10179592	2	121246568	C	T	0.8991	0.1156	0.0193	2.29599e-09	127442	COVID-19 hospitalization	C	T	0.909	0.026198	0.035733	0.4635	1887658	35.8758	0.000281
ER- breast cancer	ieu-a-1128	rs10885405	10	114777670	T	C	0.4613	0.0716	0.0113	2.003e-10	127442	COVID-19 hospitalization	T	C	0.4594	-0.031906	0.018342	0.08194	1887658	40.1485	0.000315
ER- breast cancer	ieu-a-1128	rs10995201	10	64299890	G	A	0.1582	-0.0963	0.0159	1.56899e-09	127442	COVID-19 hospitalization	G	A	0.1712	-0.041853	0.028767	0.1457	1887658	36.6824	0.000288
ER- breast cancer	ieu-a-1128	rs12129456	1	202189087	G	T	0.4095	-0.0835	0.0118	1.41091e-12	127442	COVID-19 hospitalization	G	T	0.42	-0.0036301	0.019197	0.85	1887658	50.0736	0.000393
ER- breast cancer	ieu-a-1128	rs12990503	2	218294217	G	C	0.7368	-0.0734	0.0126	6.47993e-09	127442	COVID-19 hospitalization	G	C	0.7267	-0.0044235	0.020584	0.8298	1887658	33.9352	0.000266
ER- breast cancer	ieu-a-1128	rs1432679	5	158244083	T	C	0.5656	-0.073	0.0113	1.05499e-10	127442	COVID-19 hospitalization	T	C	0.5854	0.0033136	0.019046	0.8619	1887658	41.7339	0.000327
ER- breast cancer	ieu-a-1128	rs17828955	14	69016645	C	T	0.2649	-0.0797	0.013	7.76104e-10	127442	COVID-19 hospitalization	C	T	0.2765	-0.011788	0.023056	0.6092	1887658	37.5863	0.000295
ER- breast cancer	ieu-a-1128	rs2169137	1	204497913	C	G	0.7396	-0.128	0.0128	1.41808e-23	127442	COVID-19 hospitalization	C	G	0.7603	-0.041429	0.020364	0.04191	1887658	100	0.000784
ER- breast cancer	ieu-a-1128	rs2747652	6	152437016	C	T	0.526	0.0991	0.0113	1.92619e-18	127442	COVID-19 hospitalization	C	T	0.5685	-0.0022347	0.018885	0.9058	1887658	76.9113	0.000603
ER- breast cancer	ieu-a-1128	rs3769823	2	202122995	G	A	0.7071	-0.0684	0.0121	1.76202e-08	127442	COVID-19 hospitalization	G	A	0.696	-0.010309	0.019787	0.6024	1887658	31.9552	0.000251
ER- breast cancer	ieu-a-1128	rs4143044	13	73956279	G	T	0.7661	0.0833	0.0135	6.89096e-10	127442	COVID-19 hospitalization	G	T	0.7815	-0.021391	0.023536	0.3634	1887658	38.0735	0.000299
ER- breast cancer	ieu-a-1128	rs4528762	2	121079515	C	A	0.2646	-0.1213	0.0147	1.92088e-16	127442	COVID-19 hospitalization	C	A	0.2579	-0.00071753	0.026136	0.9781	1887658	68.0906	0.000534
ER- breast cancer	ieu-a-1128	rs4784227	16	52599188	T	C	0.2403	0.1368	0.0128	1.72385e-26	127442	COVID-19 hospitalization	T	C	0.2406	-0.012128	0.020986	0.5633	1887658	114.223	0.000895
ER- breast cancer	ieu-a-1128	rs55872725	16	53809123	T	C	0.4152	-0.0784	0.0115	8.59014e-12	127442	COVID-19 hospitalization	T	C	0.4196	0.019368	0.018483	0.2947	1887658	46.4768	0.000365
ER- breast cancer	ieu-a-1128	rs56069439	19	17393925	A	C	0.2971	0.155	0.0121	1.24997e-37	127442	COVID-19 hospitalization	A	C	0.3017	0.014597	0.020175	0.4694	1887658	164.094	0.001286
ER- breast cancer	ieu-a-1128	rs56309329	6	82295951	T	A	0.2368	0.0734	0.0131	2.09701e-08	127442	COVID-19 hospitalization	T	A	0.2451	0.0064832	0.021669	0.7648	1887658	31.3942	0.000246
ER- breast cancer	ieu-a-1128	rs56687477	8	36832310	A	G	0.1577	-0.1114	0.016	3.18713e-12	127442	COVID-19 hospitalization	A	G	0.1515	-0.0026332	0.025366	0.9173	1887658	48.4764	0.00038
ER- breast cancer	ieu-a-1128	rs616402	1	10566272	T	C	0.307	-0.1172	0.0124	2.64972e-21	127442	COVID-19 hospitalization	T	C	0.3166	0.011599	0.019662	0.5552	1887658	89.333	0.0007
ER- breast cancer	ieu-a-1128	rs6569648	6	130349119	T	C	0.7651	0.0741	0.0135	4.25804e-08	127442	COVID-19 hospitalization	T	C	0.7602	-0.01008	0.021322	0.6364	1887658	30.1279	0.000236
ER- breast cancer	ieu-a-1128	rs6725517	2	25129473	G	A	0.4065	-0.0683	0.0122	1.98299e-08	127442	COVID-19 hospitalization	G	A	0.402	-0.021954	0.018447	0.234	1887658	31.3416	0.000246
ER- breast cancer	ieu-a-1128	rs76956704	6	152031496	T	C	0.03	0.2193	0.0325	1.49486e-11	127442	COVID-19 hospitalization	T	C	0.03534	0.041705	0.058133	0.4731	1887658	45.5314	0.000357
ER- breast cancer	ieu-a-1128	rs7710996	5	44514350	G	A	0.7729	-0.0773	0.0132	5.18501e-09	127442	COVID-19 hospitalization	G	A	0.7662	0.053551	0.025264	0.03404	1887658	34.2934	0.000269
ER- breast cancer	ieu-a-1128	rs9397437	6	151952332	A	G	0.0682	0.2733	0.0206	2.75931e-40	127442	COVID-19 hospitalization	A	G	0.05954	-0.015445	0.03547	0.6632	1887658	176.013	0.001379
Endometrial cancer	ebi-a-GCST006464	rs10089519	8	129532118	G	A	0.666762	0.0902401	0.0162873	3.01578e-08	121885	COVID-19 hospitalization	G	A	0.6694	0.0070729	0.021705	0.7445	1887658	30.6974	0.000252
Endometrial cancer	ebi-a-GCST006464	rs10835920	11	32489664	T	C	0.364733	0.0892075	0.015698	1.32562e-08	121885	COVID-19 hospitalization	T	C	0.3528	-0.04538	0.021094	0.03145	1887658	32.2934	0.000265
Endometrial cancer	ebi-a-GCST006464	rs113998067	1	38073356	C	T	0.0481754	0.204335	0.0370808	3.57726e-08	121885	COVID-19 hospitalization	C	T	0.04013	0.066443	0.043464	0.1263	1887658	30.366	0.000249
Endometrial cancer	ebi-a-GCST006464	rs11651052	17	36102381	G	A	0.547556	0.141454	0.0153955	4.00037e-20	121885	COVID-19 hospitalization	G	A	0.5682	-0.0034147	0.021163	0.8718	1887658	84.4195	0.000692
Endometrial cancer	ebi-a-GCST006464	rs148261157	2	60897579	A	G	0.0404386	0.229226	0.0415263	3.38992e-08	121885	COVID-19 hospitalization	A	G	0.04111	0.071793	0.048113	0.1357	1887658	30.4706	0.00025
Endometrial cancer	ebi-a-GCST006464	rs1740828	6	21649085	A	G	0.485476	-0.137017	0.0168448	4.15145e-16	121885	COVID-19 hospitalization	A	G	0.4872	0.0092646	0.021864	0.6718	1887658	66.1633	0.000543
Endometrial cancer	ebi-a-GCST006464	rs17601876	15	51553909	G	A	0.484921	0.115832	0.0152668	3.26889e-14	121885	COVID-19 hospitalization	G	A	0.4936	0.0082792	0.02032	0.6837	1887658	57.5653	0.000472
Endometrial cancer	ebi-a-GCST006464	rs4733613	8	129599278	G	C	0.862502	-0.154791	0.0221996	3.10957e-12	121885	COVID-19 hospitalization	G	C	0.8683	-0.019374	0.031205	0.5347	1887658	48.6185	0.000399
Endometrial cancer	ebi-a-GCST006464	rs7981863	13	73812141	T	C	0.265982	-0.146429	0.0173105	2.69836e-17	121885	COVID-19 hospitalization	T	C	0.2417	-0.026686	0.022723	0.2402	1887658	71.5542	0.000587
Endometrial cancer	ebi-a-GCST006464	rs882380	17	46294236	A	C	0.608645	0.0919141	0.0156883	4.66283e-09	121885	COVID-19 hospitalization	A	C	0.6021	0.025095	0.018777	0.1814	1887658	34.3252	0.000282
Endometrial cancer	ebi-a-GCST006464	rs937213	15	40322124	C	T	0.426577	0.089169	0.0152556	5.06512e-09	121885	COVID-19 hospitalization	C	T	0.4328	-0.0083618	0.021794	0.7012	1887658	34.164	0.00028
Endometrial cancer	ebi-a-GCST006464	rs9668337	12	26426338	A	G	0.743413	0.107599	0.0176545	1.09628e-09	121885	COVID-19 hospitalization	A	G	0.7347	0.0023884	0.020408	0.9068	1887658	37.1455	0.000305
Prostate cancer	ieu-b-85	rs1004030	14	23305649	C	T	0.4156	-0.0462	0.0082	1.54899e-08	140254	COVID-19 hospitalization	C	T	0.4199	-0.012898	0.0215	0.5486	1887658	31.7436	0.000226
Prostate cancer	ieu-b-85	rs10122495	9	34049779	A	T	0.704	-0.0501	0.0088	1.33601e-08	140254	COVID-19 hospitalization	A	T	0.6687	0.018332	0.02411	0.447	1887658	32.4123	0.000231
Prostate cancer	ieu-b-85	rs10127983	1	153923276	T	C	0.3117	0.0631	0.0085	1.01601e-13	140254	COVID-19 hospitalization	T	C	0.3092	-0.01061	0.019649	0.5892	1887658	55.1088	0.000393
Prostate cancer	ieu-b-85	rs10460109	18	73036165	C	T	0.5857	-0.0441	0.008	3.48297e-08	140254	COVID-19 hospitalization	C	T	0.5662	-0.0048951	0.020588	0.8121	1887658	30.3877	0.000217
Prostate cancer	ieu-b-85	rs1048019	6	160147630	G	A	0.2849	-0.0569	0.0091	3.21899e-10	140254	COVID-19 hospitalization	G	A	0.2871	0.012233	0.020364	0.548	1887658	39.0968	0.000279
Prostate cancer	ieu-b-85	rs1048169	9	19055965	C	T	0.379	0.0609	0.0081	6.52529e-14	140254	COVID-19 hospitalization	C	T	0.39	-0.012825	0.018943	0.4984	1887658	56.5281	0.000403
Prostate cancer	ieu-b-85	rs10486567	7	27976563	A	G	0.2373	-0.1335	0.0094	2.03704e-45	140254	COVID-19 hospitalization	A	G	0.2375	-0.016651	0.021531	0.4393	1887658	201.7	0.001436
Prostate cancer	ieu-b-85	rs10793821	5	133836209	T	C	0.5795	0.0527	0.008	5.4275e-11	140254	COVID-19 hospitalization	T	C	0.5833	0.0063689	0.020798	0.7594	1887658	43.3952	0.000309
Prostate cancer	ieu-b-85	rs10845938	12	14416918	G	A	0.5541	0.0572	0.008	9.80393e-13	140254	COVID-19 hospitalization	G	A	0.5926	0.019171	0.02059	0.3518	1887658	51.1225	0.000364
Prostate cancer	ieu-b-85	rs10870546	12	133054609	G	A	0.7122	-0.0531	0.0089	2.86999e-09	140254	COVID-19 hospitalization	G	A	0.6987	0.011959	0.020775	0.5649	1887658	35.5966	0.000254
Prostate cancer	ieu-b-85	rs10947980	6	41525739	G	A	0.2634	0.0834	0.0089	8.78011e-21	140254	COVID-19 hospitalization	G	A	0.2725	-0.0058995	0.020798	0.7767	1887658	87.8116	0.000626
Prostate cancer	ieu-b-85	rs11135766	8	23533623	T	C	0.5736	-0.1291	0.008	5.09214e-59	140254	COVID-19 hospitalization	T	C	0.5805	-0.0066718	0.019317	0.7298	1887658	260.419	0.001853
Prostate cancer	ieu-b-85	rs11135910	8	25892142	T	C	0.1529	0.0782	0.011	9.1939e-13	140254	COVID-19 hospitalization	T	C	0.1522	-0.029964	0.025463	0.2393	1887658	50.5392	0.00036
Prostate cancer	ieu-b-85	rs11214775	11	113807181	A	G	0.2915	-0.071	0.009	3.92826e-15	140254	COVID-19 hospitalization	A	G	0.2903	0.040771	0.022648	0.07183	1887658	62.2346	0.000444
Prostate cancer	ieu-b-85	rs11263763	17	36103565	A	G	0.5292	0.2033	0.008	3.06196e-141	140254	COVID-19 hospitalization	A	G	0.5647	-0.0077647	0.021805	0.7218	1887658	645.795	0.004583
Prostate cancer	ieu-b-85	rs113577745	2	10135681	G	C	0.098	0.0784	0.0131	2.08901e-09	140254	COVID-19 hospitalization	G	C	0.09158	0.014339	0.030566	0.639	1887658	35.817	0.000255
Prostate cancer	ieu-b-85	rs11666569	19	17214073	T	C	0.2867	-0.0516	0.009	8.16808e-09	140254	COVID-19 hospitalization	T	C	0.2602	0.03074	0.020095	0.1261	1887658	32.8711	0.000234
Prostate cancer	ieu-b-85	rs11691517	2	111893096	G	T	0.2589	-0.0635	0.0091	3.51075e-12	140254	COVID-19 hospitalization	G	T	0.2734	-0.010709	0.021824	0.6236	1887658	48.6928	0.000347
Prostate cancer	ieu-b-85	rs1182	9	132576060	A	C	0.2198	0.0581	0.0095	1.102e-09	140254	COVID-19 hospitalization	A	C	0.2135	0.013415	0.025651	0.601	1887658	37.4029	0.000267
Prostate cancer	ieu-b-85	rs11863709	16	57654576	T	C	0.0403	-0.1481	0.022	1.78197e-11	140254	COVID-19 hospitalization	T	C	0.03647	-0.011675	0.050724	0.818	1887658	45.3174	0.000323
Prostate cancer	ieu-b-85	rs12004058	9	18564470	G	C	0.312	-0.0481	0.0086	2.35798e-08	140254	COVID-19 hospitalization	G	C	0.2865	0.013797	0.022378	0.5375	1887658	31.2819	0.000223
Prostate cancer	ieu-b-85	rs12139208	1	88213014	C	T	0.6286	-0.0458	0.0082	2.57899e-08	140254	COVID-19 hospitalization	C	T	0.6132	-0.050166	0.018953	0.008123	1887658	31.1963	0.000222
Prostate cancer	ieu-b-85	rs12179053	6	160711566	T	C	0.2603	-0.0559	0.0091	6.49696e-10	140254	COVID-19 hospitalization	T	C	0.2621	0.030059	0.023587	0.2025	1887658	37.7347	0.000269
Prostate cancer	ieu-b-85	rs12510147	4	95521863	A	G	0.3115	-0.0888	0.0086	4.3401e-25	140254	COVID-19 hospitalization	A	G	0.3076	0.0062122	0.019825	0.754	1887658	106.618	0.00076
Prostate cancer	ieu-b-85	rs12610267	19	38744733	G	A	0.5103	-0.0966	0.0079	4.86743e-34	140254	COVID-19 hospitalization	G	A	0.534	0.010477	0.018237	0.5656	1887658	149.52	0.001065
Prostate cancer	ieu-b-85	rs12665339	6	30601232	G	A	0.1674	0.0615	0.0106	5.55699e-09	140254	COVID-19 hospitalization	G	A	0.1843	-0.063361	0.025679	0.01361	1887658	33.6619	0.00024
Prostate cancer	ieu-b-85	rs12795301	11	68992285	A	C	0.1586	0.2201	0.0105	3.06973e-98	140254	COVID-19 hospitalization	A	C	0.1422	0.012542	0.024521	0.609	1887658	439.401	0.003123
Prostate cancer	ieu-b-85	rs1283104	3	106962521	G	C	0.3788	0.047	0.0082	8.8111e-09	140254	COVID-19 hospitalization	G	C	0.3717	0.043456	0.02076	0.03633	1887658	32.8525	0.000234
Prostate cancer	ieu-b-85	rs12956892	18	56746315	T	G	0.3021	0.0498	0.0086	7.68405e-09	140254	COVID-19 hospitalization	T	G	0.3137	0.050116	0.019768	0.01124	1887658	33.5322	0.000239
Prostate cancer	ieu-b-85	rs13174377	5	1543918	G	A	0.04	0.1432	0.021	8.7438e-12	140254	COVID-19 hospitalization	G	A	0.05109	0.024388	0.04823	0.6131	1887658	46.4994	0.000331
Prostate cancer	ieu-b-85	rs13332673	16	89940386	T	G	0.0129	0.2246	0.0394	1.17601e-08	140254	COVID-19 hospitalization	T	G	0.01105	0.12383	0.090585	0.1716	1887658	32.4958	0.000232
Prostate cancer	ieu-b-85	rs1482680	5	44392142	A	G	0.6667	-0.0501	0.0085	3.58303e-09	140254	COVID-19 hospitalization	A	G	0.6661	-0.010483	0.022722	0.6445	1887658	34.7406	0.000248
Prostate cancer	ieu-b-85	rs16958674	16	57693055	T	C	0.2385	-0.0533	0.0094	1.274e-08	140254	COVID-19 hospitalization	T	C	0.2516	0.011549	0.024506	0.6375	1887658	32.1513	0.000229
Prostate cancer	ieu-b-85	rs17369534	3	152064639	C	G	0.1047	-0.0873	0.0134	6.51478e-11	140254	COVID-19 hospitalization	C	G	0.08695	0.01404	0.032459	0.6653	1887658	42.4443	0.000303
Prostate cancer	ieu-b-85	rs17599629	1	150658287	G	A	0.2181	0.0654	0.0096	9.87188e-12	140254	COVID-19 hospitalization	G	A	0.2189	0.036903	0.021977	0.09312	1887658	46.4102	0.000331
Prostate cancer	ieu-b-85	rs17621345	7	40875192	C	A	0.2587	-0.0715	0.0095	6.72048e-14	140254	COVID-19 hospitalization	C	A	0.2695	0.024235	0.022775	0.2873	1887658	56.6454	0.000404
Prostate cancer	ieu-b-85	rs17749618	11	76251818	G	A	0.324	-0.0609	0.0085	7.47997e-13	140254	COVID-19 hospitalization	G	A	0.3163	-0.040494	0.020381	0.04694	1887658	51.333	0.000366
Prostate cancer	ieu-b-85	rs17804499	4	74442349	C	G	0.0534	-0.1542	0.0192	9.15166e-16	140254	COVID-19 hospitalization	C	G	0.04895	0.011348	0.039277	0.7726	1887658	64.501	0.00046
Prostate cancer	ieu-b-85	rs1881502	11	1507512	C	T	0.8097	-0.0581	0.0101	7.42198e-09	140254	COVID-19 hospitalization	C	T	0.8125	0.005572	0.023159	0.8099	1887658	33.091	0.000236
Prostate cancer	ieu-b-85	rs1978060	22	19749525	G	A	0.6127	0.0568	0.0083	8.54083e-12	140254	COVID-19 hospitalization	G	A	0.6301	-0.0070973	0.02238	0.7511	1887658	46.8318	0.000334
Prostate cancer	ieu-b-85	rs2018336	6	11217897	C	T	0.2206	-0.0679	0.0096	1.9059e-12	140254	COVID-19 hospitalization	C	T	0.2018	0.01403	0.021669	0.5173	1887658	50.0262	0.000357
Prostate cancer	ieu-b-85	rs2028900	2	85767735	T	C	0.4418	-0.082	0.008	6.67421e-25	140254	COVID-19 hospitalization	T	C	0.4257	-0.02358	0.018351	0.1988	1887658	105.062	0.000749
Prostate cancer	ieu-b-85	rs2191139	19	42001210	C	T	0.7474	0.0875	0.0093	3.25162e-21	140254	COVID-19 hospitalization	C	T	0.7452	0.032768	0.024374	0.1788	1887658	88.5218	0.000631
Prostate cancer	ieu-b-85	rs2242652	5	1280028	A	G	0.2054	-0.1598	0.0105	3.46019e-52	140254	COVID-19 hospitalization	A	G	0.2122	-0.019834	0.025294	0.433	1887658	231.619	0.001649
Prostate cancer	ieu-b-85	rs2256814	20	62373983	A	G	0.1904	-0.0958	0.0106	1.40185e-19	140254	COVID-19 hospitalization	A	G	0.2028	-0.042213	0.023688	0.07475	1887658	81.6807	0.000582
Prostate cancer	ieu-b-85	rs28441558	17	7803118	C	T	0.0548	0.1507	0.0182	1.01601e-16	140254	COVID-19 hospitalization	C	T	0.05763	0.024479	0.041155	0.552	1887658	68.562	0.000489
Prostate cancer	ieu-b-85	rs28485589	2	173303031	G	A	0.0608	-0.2441	0.0176	1.10688e-43	140254	COVID-19 hospitalization	G	A	0.05901	-0.025386	0.039848	0.5241	1887658	192.358	0.00137
Prostate cancer	ieu-b-85	rs2928681	8	23437981	A	C	0.5887	-0.0553	0.008	5.37527e-12	140254	COVID-19 hospitalization	A	C	0.6009	0.01339	0.018514	0.4695	1887658	47.7827	0.000341
Prostate cancer	ieu-b-85	rs3127580	6	160710851	T	C	0.1402	0.1214	0.0111	6.59629e-28	140254	COVID-19 hospitalization	T	C	0.1365	0.033964	0.030347	0.2631	1887658	119.617	0.000852
Prostate cancer	ieu-b-85	rs339351	6	117200434	A	C	0.3052	-0.0843	0.0087	2.89601e-22	140254	COVID-19 hospitalization	A	C	0.3201	-0.027866	0.020093	0.1655	1887658	93.8894	0.000669
Prostate cancer	ieu-b-85	rs33984059	15	56385868	G	A	0.0225	-0.1761	0.0308	1.102e-08	140254	COVID-19 hospitalization	G	A	0.025	0.11979	0.061315	0.05074	1887658	32.6902	0.000233
Prostate cancer	ieu-b-85	rs34487581	10	897201	A	G	0.1585	0.0775	0.0109	9.34329e-13	140254	COVID-19 hospitalization	A	G	0.1713	-0.017385	0.025657	0.498	1887658	50.5534	0.00036
Prostate cancer	ieu-b-85	rs35644221	12	90227779	A	G	0.3192	-0.0604	0.0088	8.13954e-12	140254	COVID-19 hospitalization	A	G	0.3405	-0.015875	0.022471	0.4799	1887658	47.1095	0.000336
Prostate cancer	ieu-b-85	rs4646284	6	160581543	T	TG	0.7075	-0.196	0.0087	2.91743e-112	140254	COVID-19 hospitalization	T	TG	0.7063	0.040349	0.024586	0.1008	1887658	507.544	0.003606
Prostate cancer	ieu-b-85	rs4711748	6	43694598	C	T	0.7746	-0.0521	0.0094	3.36101e-08	140254	COVID-19 hospitalization	C	T	0.7705	-0.0079314	0.024093	0.742	1887658	30.7199	0.000219
Prostate cancer	ieu-b-85	rs4795643	17	30092614	A	C	0.2287	-0.0618	0.0103	1.639e-09	140254	COVID-19 hospitalization	A	C	0.2183	-0.012134	0.024872	0.6256	1887658	36	0.000257
Prostate cancer	ieu-b-85	rs4889467	16	82169385	T	C	0.6506	-0.0463	0.0082	1.91399e-08	140254	COVID-19 hospitalization	T	C	0.6516	-0.031093	0.021813	0.154	1887658	31.8812	0.000227
Prostate cancer	ieu-b-85	rs4924487	15	40922915	C	G	0.8359	0.0622	0.0109	1.32099e-08	140254	COVID-19 hospitalization	C	G	0.8491	-0.048784	0.027535	0.07644	1887658	32.5633	0.000232
Prostate cancer	ieu-b-85	rs4962419	10	126697114	A	G	0.2664	0.0598	0.0089	1.61808e-11	140254	COVID-19 hospitalization	A	G	0.2473	-0.011527	0.020024	0.5648	1887658	45.1463	0.000322
Prostate cancer	ieu-b-85	rs62003551	14	53424320	G	A	0.1425	-0.1005	0.0117	8.46253e-18	140254	COVID-19 hospitalization	G	A	0.1366	-0.0081019	0.026623	0.7609	1887658	73.7837	0.000526
Prostate cancer	ieu-b-85	rs62186433	2	242257835	G	A	0.1486	0.0863	0.011	3.20627e-15	140254	COVID-19 hospitalization	G	A	0.1569	-0.031599	0.025782	0.2203	1887658	61.5512	0.000439
Prostate cancer	ieu-b-85	rs6465657	7	97816327	T	C	0.5365	-0.1005	0.0079	6.96466e-37	140254	COVID-19 hospitalization	T	C	0.5272	0.0092252	0.018291	0.614	1887658	161.837	0.001153
Prostate cancer	ieu-b-85	rs6557265	6	153433402	C	T	0.4226	-0.077	0.008	1.0361e-21	140254	COVID-19 hospitalization	C	T	0.4317	-0.012217	0.01842	0.5072	1887658	92.6406	0.00066
Prostate cancer	ieu-b-85	rs6754084	2	202124997	C	T	0.7324	0.05	0.0091	3.52501e-08	140254	COVID-19 hospitalization	C	T	0.7291	-0.0087308	0.020454	0.6695	1887658	30.1896	0.000215
Prostate cancer	ieu-b-85	rs684232	17	618965	C	T	0.3534	0.0832	0.0082	4.3421e-24	140254	COVID-19 hospitalization	C	T	0.3572	0.031268	0.019571	0.1101	1887658	102.948	0.000733
Prostate cancer	ieu-b-85	rs6941125	6	109287209	A	T	0.1457	0.0704	0.0111	1.992e-10	140254	COVID-19 hospitalization	A	T	0.1519	0.0023646	0.025512	0.9262	1887658	40.2253	0.000287
Prostate cancer	ieu-b-85	rs6983267	8	128413305	T	G	0.4892	-0.2004	0.0079	2.8119e-141	140254	COVID-19 hospitalization	T	G	0.4756	-0.016327	0.018236	0.3706	1887658	643.489	0.004567
Prostate cancer	ieu-b-85	rs72725868	8	128091418	G	A	0.0881	-0.1175	0.015	5.46009e-15	140254	COVID-19 hospitalization	G	A	0.1009	-0.011888	0.04014	0.7671	1887658	61.3611	0.000437
Prostate cancer	ieu-b-85	rs73110464	12	53312612	T	C	0.1277	0.1583	0.0116	1.11301e-42	140254	COVID-19 hospitalization	T	C	0.1341	0.021609	0.031304	0.49	1887658	186.228	0.001326
Prostate cancer	ieu-b-85	rs7313765	12	65011980	A	G	0.4218	-0.0563	0.0082	5.7161e-12	140254	COVID-19 hospitalization	A	G	0.4261	-0.036322	0.020515	0.07664	1887658	47.1399	0.000336
Prostate cancer	ieu-b-85	rs73351629	8	128018466	G	C	0.3334	-0.1375	0.0085	5.14754e-59	140254	COVID-19 hospitalization	G	C	0.3107	-0.0086916	0.021855	0.6909	1887658	261.678	0.001862
Prostate cancer	ieu-b-85	rs7522437	1	204029890	A	G	0.4609	-0.0457	0.008	1.21001e-08	140254	COVID-19 hospitalization	A	G	0.4438	0.015509	0.020649	0.4526	1887658	32.6327	0.000233
Prostate cancer	ieu-b-85	rs75358080	3	87398945	G	A	0.0373	-0.1452	0.0216	1.70687e-11	140254	COVID-19 hospitalization	G	A	0.04126	-0.031839	0.05073	0.5302	1887658	45.1883	0.000322
Prostate cancer	ieu-b-85	rs77541621	8	128077146	A	G	0.0243	0.5907	0.0227	1.03039e-149	140254	COVID-19 hospitalization	A	G	0.03011	-0.051367	0.069628	0.4607	1887658	677.146	0.004805
Prostate cancer	ieu-b-85	rs77559646	2	242135265	A	G	0.0237	0.2492	0.0267	9.92887e-21	140254	COVID-19 hospitalization	A	G	0.03225	0.036527	0.066512	0.5829	1887658	87.1111	0.000621
Prostate cancer	ieu-b-85	rs78416326	3	170074517	C	G	0.2062	-0.1763	0.0102	5.59758e-67	140254	COVID-19 hospitalization	C	G	0.2161	0.030775	0.02604	0.2373	1887658	298.748	0.002126
Prostate cancer	ieu-b-85	rs80326387	15	66705043	A	G	0.2583	0.0567	0.0091	4.64398e-10	140254	COVID-19 hospitalization	A	G	0.27	0.0026134	0.021155	0.9017	1887658	38.8225	0.000277
Prostate cancer	ieu-b-85	rs817833	9	110152977	T	G	0.8914	-0.0733	0.0131	2.14299e-08	140254	COVID-19 hospitalization	T	G	0.8985	0.0089332	0.032325	0.7823	1887658	31.3087	0.000223
Prostate cancer	ieu-b-85	rs823121	1	205724302	A	G	0.4322	-0.0472	0.008	3.37598e-09	140254	COVID-19 hospitalization	A	G	0.4176	-0.051969	0.018565	0.005123	1887658	34.81	0.000248
Prostate cancer	ieu-b-85	rs878987	11	134266372	G	A	0.1459	0.0639	0.0117	4.77298e-08	140254	COVID-19 hospitalization	G	A	0.1639	0.022973	0.025476	0.3672	1887658	29.8284	0.000213
Prostate cancer	ieu-b-85	rs917811	7	21059022	T	C	0.6856	-0.0686	0.0085	5.50554e-16	140254	COVID-19 hospitalization	T	C	0.6684	0.0067848	0.020307	0.7383	1887658	65.1344	0.000464
Prostate cancer	ieu-b-85	rs9306894	2	20878105	G	A	0.3633	0.0777	0.0082	1.91911e-21	140254	COVID-19 hospitalization	G	A	0.3605	-0.020429	0.018794	0.2771	1887658	89.7872	0.00064
Prostate cancer	ieu-b-85	rs9443189	6	76495882	G	A	0.1429	-0.0635	0.0116	4.68004e-08	140254	COVID-19 hospitalization	G	A	0.1516	-0.015754	0.026197	0.5476	1887658	29.9662	0.000214
Prostate cancer	ieu-b-85	rs9625483	22	28888939	A	G	0.0288	0.1338	0.024	2.43299e-08	140254	COVID-19 hospitalization	A	G	0.037	-0.071444	0.074744	0.3391	1887658	31.0806	0.000222
Prostate cancer	ieu-b-85	rs9686557	5	172959030	C	A	0.444	0.0482	0.008	1.94102e-09	140254	COVID-19 hospitalization	C	A	0.4374	-0.0053035	0.021042	0.801	1887658	36.3006	0.000259
Prostate cancer	ieu-b-85	rs9812088	3	128263668	A	G	0.3	-0.0524	0.0088	2.98999e-09	140254	COVID-19 hospitalization	A	G	0.2861	0.025581	0.022937	0.2647	1887658	35.4566	0.000253
Prostate cancer	ieu-b-85	rs9907478	17	47395729	T	C	0.0757	0.1064	0.0147	4.5196e-13	140254	COVID-19 hospitalization	T	C	0.07326	0.019634	0.036649	0.5921	1887658	52.39	0.000373
Prostate cancer	ieu-b-85	rs9911515	17	69115358	G	A	0.5197	-0.1618	0.0079	6.46994e-93	140254	COVID-19 hospitalization	G	A	0.5173	-0.019753	0.018927	0.2967	1887658	419.472	0.002982
Prostate cancer	ieu-b-85	rs9959454	18	76770820	G	A	0.2672	-0.0872	0.009	5.34441e-22	140254	COVID-19 hospitalization	G	A	0.2642	-0.051588	0.023415	0.02758	1887658	93.8746	0.000669
Prostate cancer	ieu-b-85	rs9978557	21	42882462	T	C	0.098	-0.1009	0.0143	2.01883e-12	140254	COVID-19 hospitalization	T	C	0.1042	0.010266	0.035201	0.7706	1887658	49.7863	0.000355
Thyroid cancer	ieu-a-1082	rs1001948	10	25466693	C	A	0.6861	2.08667	0.1023	1.36773e-104	1187	COVID-19 hospitalization	C	A	0.3941	-0.038699	0.022516	0.08566	1887658	416.06	0.259865
Thyroid cancer	ieu-a-1082	rs10049939	4	65252628	G	A	0.8437	3.0297	0.1997	1.39316e-86	1187	COVID-19 hospitalization	G	A	0.7516	0.014822	0.02279	0.5155	1887658	230.167	0.162643
Thyroid cancer	ieu-a-1082	rs10124357	9	79429800	C	T	0.7295	2.05416	0.1069	1.43285e-94	1187	COVID-19 hospitalization	C	T	0.4746	-0.018303	0.018861	0.3318	1887658	369.244	0.237571
Thyroid cancer	ieu-a-1082	rs1019024	8	1363967	C	T	0.4387	1.29088	0.09109	2.02395e-47	1187	COVID-19 hospitalization	C	T	0.2562	0.039426	0.023315	0.09083	1887658	200.831	0.144917
Thyroid cancer	ieu-a-1082	rs10199888	2	216503552	T	C	0.2828	-1.20397	0.09614	1.41514e-37	1187	COVID-19 hospitalization	T	C	0.1563	0.0087988	0.026967	0.7442	1887658	156.828	0.116876
Thyroid cancer	ieu-a-1082	rs10208038	2	25032151	G	T	0.5615	0.540426	0.08517	1.92801e-10	1187	COVID-19 hospitalization	G	T	0.4934	0.002044	0.018361	0.9114	1887658	40.2624	0.03286
Thyroid cancer	ieu-a-1082	rs10260654	7	50191216	T	G	0.356	-0.521044	0.08762	2.41602e-09	1187	COVID-19 hospitalization	T	G	0.4625	0.048584	0.021517	0.02395	1887658	35.3624	0.028977
Thyroid cancer	ieu-a-1082	rs1032389	12	99692723	A	C	0.2812	-0.617298	0.09315	2.59896e-11	1187	COVID-19 hospitalization	A	C	0.38	0.011239	0.022214	0.6129	1887658	43.9161	0.035736
Thyroid cancer	ieu-a-1082	rs10474588	5	78772071	C	A	0.5398	0.663588	0.08487	3.95094e-15	1187	COVID-19 hospitalization	C	A	0.4637	0.021648	0.020702	0.2957	1887658	61.1348	0.04906
Thyroid cancer	ieu-a-1082	rs10475268	5	492922	T	G	0.4441	-0.57412	0.08545	1.54917e-11	1187	COVID-19 hospitalization	T	G	0.5678	-0.082376	0.021514	0.0001287	1887658	45.142	0.036697
Thyroid cancer	ieu-a-1082	rs10493096	1	42325122	A	C	0.1507	-0.683197	0.117	3.395e-09	1187	COVID-19 hospitalization	A	C	0.1702	-0.027173	0.024908	0.2753	1887658	34.0973	0.027969
Thyroid cancer	ieu-a-1082	rs10494448	1	165831128	C	A	0.3019	-0.552169	0.09228	1.83101e-09	1187	COVID-19 hospitalization	C	A	0.4017	-0.011021	0.021328	0.6054	1887658	35.8038	0.029328
Thyroid cancer	ieu-a-1082	rs10502692	18	36040352	T	C	0.07807	-3.89026	0.4175	1.81886e-54	1187	COVID-19 hospitalization	T	C	0.2081	-0.012324	0.022613	0.5858	1887658	86.8249	0.068268
Thyroid cancer	ieu-a-1082	rs10513889	18	54011876	C	A	0.5832	0.468245	0.08528	3.69496e-08	1187	COVID-19 hospitalization	C	A	0.5403	0.014305	0.018085	0.429	1887658	30.1475	0.02481
Thyroid cancer	ieu-a-1082	rs10744891	12	117722341	T	G	0.3274	-0.557568	0.08994	4.77101e-10	1187	COVID-19 hospitalization	T	G	0.4181	-0.0013197	0.020386	0.9484	1887658	38.4317	0.031413
Thyroid cancer	ieu-a-1082	rs10762573	10	75798148	C	A	0.7425	0.768302	0.09634	7.78037e-16	1187	COVID-19 hospitalization	C	A	0.646	0.010173	0.01915	0.5953	1887658	63.5991	0.050936
Thyroid cancer	ieu-a-1082	rs10777489	12	93653808	G	T	0.5295	-0.475613	0.0856	2.52802e-08	1187	COVID-19 hospitalization	G	T	0.6063	0.012597	0.019174	0.5112	1887658	30.8717	0.025391
Thyroid cancer	ieu-a-1082	rs10786634	10	103164342	G	T	0.5246	0.573233	0.08545	1.66917e-11	1187	COVID-19 hospitalization	G	T	0.3745	0.00030971	0.018761	0.9868	1887658	45.0027	0.036587
Thyroid cancer	ieu-a-1082	rs10787889	10	120758823	T	G	0.3478	-0.650854	0.08824	1.19895e-13	1187	COVID-19 hospitalization	T	G	0.3918	-0.012421	0.021825	0.5693	1887658	54.4047	0.043896
Thyroid cancer	ieu-a-1082	rs10812736	9	28064690	A	C	0.1699	-0.763141	0.1119	4.6505e-12	1187	COVID-19 hospitalization	A	C	0.1826	0.010515	0.023013	0.6477	1887658	46.5103	0.037767
Thyroid cancer	ieu-a-1082	rs1082023	7	40006195	T	G	0.323	-1.96184	0.101	1.93019e-93	1187	COVID-19 hospitalization	T	G	0.6472	0.044322	0.022143	0.04532	1887658	377.298	0.241502
Thyroid cancer	ieu-a-1082	rs10832835	11	2880009	C	A	0.2502	-2.3086	0.1175	1.5417e-104	1187	COVID-19 hospitalization	C	A	0.5273	-0.0061614	0.02058	0.7646	1887658	386.031	0.245718
Thyroid cancer	ieu-a-1082	rs10833197	11	19953492	A	C	0.431	-0.579461	0.08526	9.00326e-12	1187	COVID-19 hospitalization	A	C	0.5393	0.026098	0.02078	0.2092	1887658	46.191	0.037517
Thyroid cancer	ieu-a-1082	rs10860779	12	102127262	A	C	0.2764	-0.524756	0.09341	1.66598e-08	1187	COVID-19 hospitalization	A	C	0.307	-0.014948	0.019904	0.4526	1887658	31.5594	0.025941
Thyroid cancer	ieu-a-1082	rs10869031	9	74130286	G	T	0.5979	0.553559	0.08603	1.05699e-10	1187	COVID-19 hospitalization	G	T	0.5189	-0.0041493	0.018257	0.8202	1887658	41.4026	0.033759
Thyroid cancer	ieu-a-1082	rs10877902	12	63044181	T	G	0.3463	0.658556	0.09125	3.76617e-13	1187	COVID-19 hospitalization	T	G	0.2287	0.034857	0.021287	0.1015	1887658	52.0858	0.042104
Thyroid cancer	ieu-a-1082	rs10894838	11	134410837	T	G	0.1618	-2.45877	0.1547	1.42692e-77	1187	COVID-19 hospitalization	T	G	0.2579	-0.023955	0.022499	0.287	1887658	252.613	0.175717
Thyroid cancer	ieu-a-1082	rs10916258	1	228219882	A	C	0.1515	-0.735011	0.1172	2.067e-10	1187	COVID-19 hospitalization	A	C	0.2179	0.030274	0.026224	0.2483	1887658	39.3308	0.032124
Thyroid cancer	ieu-a-1082	rs10928200	2	144578152	T	G	0.2569	-0.761854	0.09678	1.84289e-15	1187	COVID-19 hospitalization	T	G	0.3809	0.0066957	0.019187	0.7271	1887658	61.9687	0.049695
Thyroid cancer	ieu-a-1082	rs10949938	7	64254791	T	G	0.7805	2.06593	0.1197	2.65399e-79	1187	COVID-19 hospitalization	T	G	0.6406	-0.0092084	0.019533	0.6373	1887658	297.881	0.20088
Thyroid cancer	ieu-a-1082	rs10952871	7	85593608	T	G	0.351	-0.493805	0.0879	1.74598e-08	1187	COVID-19 hospitalization	T	G	0.411	-0.025552	0.019387	0.1875	1887658	31.5597	0.025942
Thyroid cancer	ieu-a-1082	rs11006981	10	28568378	C	A	0.06557	-2.36542	0.2435	5.00611e-32	1187	COVID-19 hospitalization	C	A	0.1297	0.011657	0.026996	0.6659	1887658	94.3667	0.07376
Thyroid cancer	ieu-a-1082	rs11041733	11	8103104	T	G	0.4017	-2.09883	0.09586	5.05825e-117	1187	COVID-19 hospitalization	T	G	0.5921	-0.0149	0.020948	0.4769	1887658	479.38	0.288023
Thyroid cancer	ieu-a-1082	rs11098432	4	119203708	C	A	0.4889	0.493476	0.08449	4.68004e-09	1187	COVID-19 hospitalization	C	A	0.4524	-0.028808	0.019	0.1295	1887658	34.1131	0.027982
Thyroid cancer	ieu-a-1082	rs11132917	4	172764187	G	T	0.6498	0.555997	0.0875	1.77101e-10	1187	COVID-19 hospitalization	G	T	0.6676	-0.0072739	0.019101	0.7033	1887658	40.3765	0.03295
Thyroid cancer	ieu-a-1082	rs11688848	2	204916206	A	C	0.1695	-0.79518	0.1122	6.32557e-13	1187	COVID-19 hospitalization	A	C	0.173	0.018283	0.025914	0.4805	1887658	50.2279	0.040663
Thyroid cancer	ieu-a-1082	rs11692610	2	203499512	C	T	0.1364	-2.46899	0.1757	4.02439e-63	1187	COVID-19 hospitalization	C	T	0.2258	0.0039829	0.023419	0.865	1887658	197.467	0.142837
Thyroid cancer	ieu-a-1082	rs11708894	3	104966715	T	G	0.3553	-1.81708	0.09591	8.22621e-87	1187	COVID-19 hospitalization	T	G	0.6051	-0.0017465	0.021465	0.9352	1887658	358.939	0.232482
Thyroid cancer	ieu-a-1082	rs11721807	4	157094509	T	G	0.2295	-0.715802	0.09962	3.93913e-13	1187	COVID-19 hospitalization	T	G	0.3092	0.0064873	0.021227	0.7599	1887658	51.6289	0.04175
Thyroid cancer	ieu-a-1082	rs11743743	5	6598553	A	C	0.4264	-0.726497	0.08588	1.7398e-17	1187	COVID-19 hospitalization	A	C	0.5143	0.0015373	0.01836	0.9333	1887658	71.5622	0.056951
Thyroid cancer	ieu-a-1082	rs11786147	8	84764257	G	T	0.4327	0.519984	0.0856	1.11301e-09	1187	COVID-19 hospitalization	G	T	0.4177	-0.0014817	0.018823	0.9373	1887658	36.9005	0.030199
Thyroid cancer	ieu-a-1082	rs11883054	19	10157219	G	T	0.7254	0.809232	0.09519	8.52707e-18	1187	COVID-19 hospitalization	G	T	0.6842	-0.02049	0.021749	0.3461	1887658	72.2709	0.057482
Thyroid cancer	ieu-a-1082	rs1193787	11	63095411	T	C	0.464	-0.665532	0.08469	2.81709e-15	1187	COVID-19 hospitalization	T	C	0.5822	0.0033397	0.018446	0.8563	1887658	61.7552	0.049533
Thyroid cancer	ieu-a-1082	rs11975969	7	32854040	G	T	0.6931	2.13962	0.1062	2.15278e-103	1187	COVID-19 hospitalization	G	T	0.453	0.012883	0.018439	0.4848	1887658	405.905	0.255141
Thyroid cancer	ieu-a-1082	rs11993947	8	124971455	G	T	0.439	0.574364	0.08591	1.93108e-11	1187	COVID-19 hospitalization	G	T	0.4029	0.015114	0.018873	0.4232	1887658	44.6979	0.036349
Thyroid cancer	ieu-a-1082	rs12040716	1	107109564	C	A	0.3667	0.528862	0.08897	2.44399e-09	1187	COVID-19 hospitalization	C	A	0.2478	0.044484	0.020457	0.02966	1887658	35.3344	0.028955
Thyroid cancer	ieu-a-1082	rs12118017	1	111306729	C	A	0.2657	0.661656	0.09973	2.22895e-11	1187	COVID-19 hospitalization	C	A	0.229	-0.0024605	0.022054	0.9112	1887658	44.0162	0.035814
Thyroid cancer	ieu-a-1082	rs12140722	1	213091573	C	A	0.4797	0.635518	0.08543	7.85778e-14	1187	COVID-19 hospitalization	C	A	0.4899	-0.030099	0.018327	0.1005	1887658	55.3395	0.044616
Thyroid cancer	ieu-a-1082	rs12151689	2	166656155	C	A	0.7209	0.661455	0.09328	9.13692e-13	1187	COVID-19 hospitalization	C	A	0.6308	-0.0057419	0.018921	0.7615	1887658	50.2833	0.040706
Thyroid cancer	ieu-a-1082	rs1216502	11	100414877	C	A	0.8162	0.592578	0.1073	2.57199e-08	1187	COVID-19 hospitalization	C	A	0.755	0.019241	0.026896	0.4744	1887658	30.4994	0.025092
Thyroid cancer	ieu-a-1082	rs12186611	5	132805024	A	C	0.2716	-0.606236	0.09393	8.41783e-11	1187	COVID-19 hospitalization	A	C	0.357	0.039862	0.021817	0.06769	1887658	41.6557	0.033959
Thyroid cancer	ieu-a-1082	rs12196235	6	103827338	C	A	0.5571	2.06436	0.09556	3.04089e-113	1187	COVID-19 hospitalization	C	A	0.2586	0.042976	0.023903	0.07219	1887658	466.679	0.282548
Thyroid cancer	ieu-a-1082	rs1224751	6	58437809	T	C	0.4337	-0.613597	0.08499	4.13904e-13	1187	COVID-19 hospitalization	T	C	0.4932	-0.047016	0.02221	0.03427	1887658	52.1232	0.042133
Thyroid cancer	ieu-a-1082	rs12403117	1	79174955	A	C	0.2722	-0.538026	0.09403	8.96004e-09	1187	COVID-19 hospitalization	A	C	0.2983	-0.01901	0.02055	0.3549	1887658	32.7396	0.026886
Thyroid cancer	ieu-a-1082	rs12433740	14	46933240	T	G	0.2538	-0.669235	0.09594	2.05494e-12	1187	COVID-19 hospitalization	T	G	0.3693	-0.010904	0.019548	0.577	1887658	48.6584	0.039442
Thyroid cancer	ieu-a-1082	rs12441088	15	78928264	T	G	0.5583	-1.21462	0.09031	1.10994e-42	1187	COVID-19 hospitalization	T	G	0.7271	0.030667	0.0245	0.2107	1887658	180.888	0.132432
Thyroid cancer	ieu-a-1082	rs12469609	2	83383702	G	T	0.5805	0.681416	0.08627	2.02488e-15	1187	COVID-19 hospitalization	G	T	0.5618	0.021188	0.0184	0.2495	1887658	62.3886	0.050015
Thyroid cancer	ieu-a-1082	rs12510224	4	180702862	G	T	0.1798	-2.16631	0.1379	1.40799e-69	1187	COVID-19 hospitalization	G	T	0.3914	-0.0076131	0.018675	0.6835	1887658	246.782	0.17236
Thyroid cancer	ieu-a-1082	rs12524738	6	140194149	A	G	0.05297	-2.72159	0.319	1.08493e-28	1187	COVID-19 hospitalization	A	G	0.1139	-0.014435	0.03487	0.6789	1887658	72.7887	0.05787
Thyroid cancer	ieu-a-1082	rs12595914	16	83628580	T	G	0.4533	-0.563523	0.08528	3.31589e-11	1187	COVID-19 hospitalization	T	G	0.5761	-0.051649	0.018362	0.004912	1887658	43.6645	0.035538
Thyroid cancer	ieu-a-1082	rs12782349	10	54929003	A	C	0.3045	-0.555649	0.09054	6.99101e-10	1187	COVID-19 hospitalization	A	C	0.3619	-0.014526	0.019835	0.464	1887658	37.6634	0.030804
Thyroid cancer	ieu-a-1082	rs12908044	15	37186014	A	C	0.7752	2.13369	0.1224	6.63437e-82	1187	COVID-19 hospitalization	A	C	0.5853	-0.024391	0.021841	0.2641	1887658	303.878	0.204099
Thyroid cancer	ieu-a-1082	rs13019891	2	113829869	T	G	0.2479	-2.0159	0.1114	7.98914e-85	1187	COVID-19 hospitalization	T	G	0.4484	-0.0051529	0.020467	0.8012	1887658	327.467	0.216512
Thyroid cancer	ieu-a-1082	rs13292880	9	35817579	A	C	0.2652	-1.89712	0.1078	2.64119e-78	1187	COVID-19 hospitalization	A	C	0.4228	0.015904	0.020723	0.4428	1887658	309.708	0.207203
Thyroid cancer	ieu-a-1082	rs13404338	2	79450227	G	A	0.677	2.13453	0.1038	1.14025e-106	1187	COVID-19 hospitalization	G	A	0.5395	-0.017192	0.02034	0.398	1887658	422.873	0.263001
Thyroid cancer	ieu-a-1082	rs1358852	6	90120991	C	A	0.355	0.531804	0.0902	3.16497e-09	1187	COVID-19 hospitalization	C	A	0.2789	0.023319	0.022504	0.3001	1887658	34.7608	0.028498
Thyroid cancer	ieu-a-1082	rs1370301	4	147947622	G	T	0.5569	0.643595	0.08547	3.89314e-14	1187	COVID-19 hospitalization	G	T	0.5268	-0.013568	0.020247	0.5028	1887658	56.7019	0.045665
Thyroid cancer	ieu-a-1082	rs1388492	3	68245477	T	C	0.6763	0.530178	0.08976	3.002e-09	1187	COVID-19 hospitalization	T	C	0.7175	-0.043118	0.022782	0.0584	1887658	34.8881	0.028599
Thyroid cancer	ieu-a-1082	rs1414154	13	80168006	A	C	0.5004	-0.463105	0.08447	3.81197e-08	1187	COVID-19 hospitalization	A	C	0.5924	0.0076589	0.021897	0.7265	1887658	30.0576	0.024738
Thyroid cancer	ieu-a-1082	rs1459522	3	22675098	T	G	0.3622	-0.523573	0.08729	1.74598e-09	1187	COVID-19 hospitalization	T	G	0.4635	0.0041015	0.021346	0.8476	1887658	35.977	0.029466
Thyroid cancer	ieu-a-1082	rs1467345	7	11783917	A	G	0.1736	-0.882856	0.1109	5.20955e-16	1187	COVID-19 hospitalization	A	G	0.1291	-0.020825	0.028823	0.47	1887658	63.3748	0.050766
Thyroid cancer	ieu-a-1082	rs1468696	3	45370416	G	T	0.5009	0.502031	0.08463	2.72201e-09	1187	COVID-19 hospitalization	G	T	0.3813	-0.0017874	0.021778	0.9346	1887658	35.1894	0.028839
Thyroid cancer	ieu-a-1082	rs1481897	8	13582367	A	C	0.318	-0.543693	0.09031	1.47601e-09	1187	COVID-19 hospitalization	A	C	0.4189	-0.0025456	0.020975	0.9034	1887658	36.244	0.029678
Thyroid cancer	ieu-a-1082	rs1499214	3	1390985	T	G	0.2695	-0.604038	0.09358	8.33105e-11	1187	COVID-19 hospitalization	T	G	0.323	-0.023475	0.021895	0.2836	1887658	41.6641	0.033965
Thyroid cancer	ieu-a-1082	rs1513052	12	17387703	C	A	0.6588	0.599657	0.08862	1.05706e-11	1187	COVID-19 hospitalization	C	A	0.5613	0.020011	0.020631	0.3321	1887658	45.787	0.037201
Thyroid cancer	ieu-a-1082	rs1547039	14	94937886	A	C	0.4527	-1.9929	0.0943	7.24436e-108	1187	COVID-19 hospitalization	A	C	0.6592	0.030921	0.021762	0.1554	1887658	446.63	0.273732
Thyroid cancer	ieu-a-1082	rs156166	3	6425168	C	A	0.5282	0.606052	0.08453	6.06178e-13	1187	COVID-19 hospitalization	C	A	0.3859	-0.010461	0.022637	0.644	1887658	51.4041	0.041576
Thyroid cancer	ieu-a-1082	rs1577026	13	59445576	A	C	0.09253	-2.46876	0.2104	2.65705e-46	1187	COVID-19 hospitalization	A	C	0.1669	0.036444	0.023928	0.1277	1887658	137.679	0.104091
Thyroid cancer	ieu-a-1082	rs1594467	6	7920361	G	A	0.6349	2.62073	0.1073	6.18016e-156	1187	COVID-19 hospitalization	G	A	0.3356	-0.0080769	0.02238	0.7182	1887658	596.548	0.334848
Thyroid cancer	ieu-a-1082	rs1610315	6	166662128	A	C	0.475	-2.07864	0.0962	1.63305e-113	1187	COVID-19 hospitalization	A	C	0.7628	0.002004	0.022925	0.9303	1887658	466.883	0.282637
Thyroid cancer	ieu-a-1082	rs163192	5	68379836	A	C	0.4229	-0.568278	0.08593	3.1989e-11	1187	COVID-19 hospitalization	A	C	0.4706	0.0061181	0.02121	0.773	1887658	43.7353	0.035594
Thyroid cancer	ieu-a-1082	rs1667822	3	163930675	T	G	0.4096	-1.97041	0.09571	1.91867e-102	1187	COVID-19 hospitalization	T	G	0.688	-0.022183	0.020165	0.2713	1887658	423.837	0.263443
Thyroid cancer	ieu-a-1082	rs1683564	19	859214	A	C	0.2865	-0.639227	0.09313	4.87304e-12	1187	COVID-19 hospitalization	A	C	0.3451	0.00038625	0.022901	0.9865	1887658	47.1119	0.038237
Thyroid cancer	ieu-a-1082	rs16838428	4	6200768	T	C	0.0774	-2.95459	0.2916	2.18675e-42	1187	COVID-19 hospitalization	T	C	0.1278	0.065362	0.035274	0.06388	1887658	102.664	0.079729
Thyroid cancer	ieu-a-1082	rs17039540	4	161323274	A	C	0.1881	-0.581248	0.1068	4.15403e-08	1187	COVID-19 hospitalization	A	C	0.3171	-0.015839	0.020243	0.434	1887658	29.6197	0.024386
Thyroid cancer	ieu-a-1082	rs17137948	7	104115294	A	C	0.5191	0.666895	0.08455	2.24698e-15	1187	COVID-19 hospitalization	A	C	0.4189	0.011426	0.018636	0.5398	1887658	62.2139	0.049882
Thyroid cancer	ieu-a-1082	rs17256058	14	23592491	T	G	0.1303	-0.692547	0.1255	2.25798e-08	1187	COVID-19 hospitalization	T	G	0.1106	0.013834	0.030142	0.6463	1887658	30.4517	0.025054
Thyroid cancer	ieu-a-1082	rs17294252	4	138801097	A	C	0.1525	-0.64531	0.1159	1.81401e-08	1187	COVID-19 hospitalization	A	C	0.2324	0.00451	0.021974	0.8374	1887658	31.0006	0.025494
Thyroid cancer	ieu-a-1082	rs1750330	1	119493411	C	A	0.5294	0.464738	0.08413	3.07496e-08	1187	COVID-19 hospitalization	C	A	0.4168	0.023505	0.018347	0.2001	1887658	30.5151	0.025105
Thyroid cancer	ieu-a-1082	rs17571067	1	226004162	A	C	0.291	-0.569515	0.09178	4.43598e-10	1187	COVID-19 hospitalization	A	C	0.4023	-0.011907	0.018738	0.5251	1887658	38.5047	0.031471
Thyroid cancer	ieu-a-1082	rs17600706	14	99150918	T	G	0.223	-0.570753	0.09982	8.71907e-09	1187	COVID-19 hospitalization	T	G	0.2403	-0.030616	0.024579	0.2129	1887658	32.6935	0.026849
Thyroid cancer	ieu-a-1082	rs17647119	18	33118693	A	C	0.2214	-0.565634	0.1007	1.56801e-08	1187	COVID-19 hospitalization	A	C	0.235	-0.036089	0.024124	0.1347	1887658	31.5509	0.025935
Thyroid cancer	ieu-a-1082	rs1792746	18	53803363	A	C	0.3795	-0.623435	0.08744	7.83971e-13	1187	COVID-19 hospitalization	A	C	0.4414	-0.017607	0.020822	0.3978	1887658	50.8349	0.041134
Thyroid cancer	ieu-a-1082	rs1813617	2	19590019	A	C	0.3482	-0.510826	0.0875	4.64098e-09	1187	COVID-19 hospitalization	A	C	0.4092	0.0032672	0.018689	0.8612	1887658	34.0824	0.027957
Thyroid cancer	ieu-a-1082	rs1822338	11	24359477	C	A	0.6276	0.520035	0.08711	2.103e-09	1187	COVID-19 hospitalization	C	A	0.6282	0.010217	0.018884	0.5885	1887658	35.6393	0.029197
Thyroid cancer	ieu-a-1082	rs1827488	15	82391020	G	T	0.6646	0.581785	0.08911	5.44252e-11	1187	COVID-19 hospitalization	G	T	0.5946	-0.0042194	0.018667	0.8212	1887658	42.6258	0.034722
Thyroid cancer	ieu-a-1082	rs1846861	2	227359131	C	A	0.5473	0.652773	0.08532	1.51496e-14	1187	COVID-19 hospitalization	C	A	0.439	0.032288	0.020516	0.1155	1887658	58.536	0.047072
Thyroid cancer	ieu-a-1082	rs1868534	11	132094466	G	T	0.5171	0.520708	0.08434	5.92598e-10	1187	COVID-19 hospitalization	G	T	0.4465	0.0087675	0.020267	0.6653	1887658	38.1172	0.031164
Thyroid cancer	ieu-a-1082	rs1880256	2	36162761	C	A	0.7554	0.632805	0.0972	5.45758e-11	1187	COVID-19 hospitalization	C	A	0.6451	0.0036749	0.021893	0.8667	1887658	42.3845	0.034532
Thyroid cancer	ieu-a-1082	rs1885597	14	25043068	G	T	0.5337	0.498403	0.08517	4.41804e-09	1187	COVID-19 hospitalization	G	T	0.4604	-0.037312	0.020638	0.07062	1887658	34.2443	0.028086
Thyroid cancer	ieu-a-1082	rs1887387	9	90879921	T	C	0.3552	-0.641884	0.08793	2.14882e-13	1187	COVID-19 hospitalization	T	C	0.3198	-0.0050474	0.023496	0.8299	1887658	53.2892	0.043035
Thyroid cancer	ieu-a-1082	rs1889562	6	119449385	G	T	0.4127	0.628609	0.08707	3.93731e-13	1187	COVID-19 hospitalization	G	T	0.355	0.038015	0.022776	0.0951	1887658	52.1224	0.042132
Thyroid cancer	ieu-a-1082	rs1898422	2	142495019	A	C	0.1705	-0.687762	0.1108	3.50397e-10	1187	COVID-19 hospitalization	A	C	0.1595	0.048136	0.026229	0.06647	1887658	38.5298	0.031491
Thyroid cancer	ieu-a-1082	rs197559	21	19362689	G	T	0.5286	0.493969	0.08473	5.02597e-09	1187	COVID-19 hospitalization	G	T	0.4789	-0.017248	0.018971	0.3633	1887658	33.988	0.027882
Thyroid cancer	ieu-a-1082	rs2011347	2	106907876	G	T	0.6493	0.627547	0.08816	8.28705e-13	1187	COVID-19 hospitalization	G	T	0.5146	-0.052842	0.018481	0.004246	1887658	50.6698	0.041006
Thyroid cancer	ieu-a-1082	rs2026912	10	91212595	A	C	0.09948	-1.08146	0.1473	2.77779e-14	1187	COVID-19 hospitalization	A	C	0.1917	0.0052029	0.026646	0.8452	1887658	53.9033	0.043509
Thyroid cancer	ieu-a-1082	rs2044241	5	112523526	A	C	0.6889	-0.623261	0.09468	3.45621e-11	1187	COVID-19 hospitalization	A	C	0.7466	-0.013821	0.02103	0.5111	1887658	43.3335	0.035278
Thyroid cancer	ieu-a-1082	rs2121697	2	46709607	C	A	0.387	-0.530858	0.08663	7.77499e-10	1187	COVID-19 hospitalization	C	A	0.4856	0.00098734	0.018316	0.957	1887658	37.5509	0.030715
Thyroid cancer	ieu-a-1082	rs2157787	16	72928928	C	A	0.6058	2.05885	0.09758	1.30017e-108	1187	COVID-19 hospitalization	C	A	0.3406	-0.02909	0.02298	0.2056	1887658	445.172	0.273083
Thyroid cancer	ieu-a-1082	rs2236674	21	45880800	A	C	0.6228	-0.63074	0.08952	1.38899e-12	1187	COVID-19 hospitalization	A	C	0.6736	-0.032718	0.01994	0.1008	1887658	49.6433	0.040209
Thyroid cancer	ieu-a-1082	rs2239214	14	72888427	G	A	0.2728	1.55878	0.1133	1.55418e-47	1187	COVID-19 hospitalization	G	A	0.1075	0.04259	0.033489	0.2035	1887658	189.282	0.137732
Thyroid cancer	ieu-a-1082	rs2250057	9	135775203	A	C	0.407	-1.34861	0.09026	1.62892e-52	1187	COVID-19 hospitalization	A	C	0.6514	-0.012476	0.018861	0.5083	1887658	223.245	0.158527
Thyroid cancer	ieu-a-1082	rs2336409	8	809079	C	A	0.4862	0.586119	0.08502	4.60257e-12	1187	COVID-19 hospitalization	C	A	0.3519	0.0015942	0.021111	0.9398	1887658	47.5258	0.03856
Thyroid cancer	ieu-a-1082	rs2368105	2	181106013	T	G	0.4901	-0.54974	0.08459	7.03234e-11	1187	COVID-19 hospitalization	T	G	0.6083	-0.024721	0.018574	0.1832	1887658	42.2354	0.034415
Thyroid cancer	ieu-a-1082	rs2414003	15	50318197	T	G	0.161	-0.740239	0.1139	4.42385e-11	1187	COVID-19 hospitalization	T	G	0.3031	-0.027517	0.021222	0.1948	1887658	42.2373	0.034417
Thyroid cancer	ieu-a-1082	rs2452477	2	143756755	T	G	0.1425	-0.66456	0.119	1.601e-08	1187	COVID-19 hospitalization	T	G	0.1726	0.018782	0.025154	0.4553	1887658	31.1871	0.025643
Thyroid cancer	ieu-a-1082	rs2484667	10	44172133	C	A	0.4435	0.473747	0.08544	2.65198e-08	1187	COVID-19 hospitalization	C	A	0.3808	-0.041825	0.019315	0.03035	1887658	30.7447	0.025289
Thyroid cancer	ieu-a-1082	rs2566511	7	150703041	T	C	0.1243	-2.49532	0.1819	3.38376e-61	1187	COVID-19 hospitalization	T	C	0.2722	-0.00021659	0.023284	0.9926	1887658	188.186	0.137043
Thyroid cancer	ieu-a-1082	rs2567501	17	70711674	C	A	0.5235	2.18214	0.09786	9.31108e-122	1187	COVID-19 hospitalization	C	A	0.276	-0.0096467	0.02236	0.6662	1887658	497.227	0.295577
Thyroid cancer	ieu-a-1082	rs2640734	8	27532654	T	C	0.1522	-2.21733	0.1503	1.35207e-63	1187	COVID-19 hospitalization	T	C	0.2148	-0.00051214	0.023529	0.9826	1887658	217.642	0.155166
Thyroid cancer	ieu-a-1082	rs2677879	18	2547500	T	G	0.4297	-1.47622	0.0908	2.95393e-62	1187	COVID-19 hospitalization	T	G	0.6097	0.014707	0.019326	0.4467	1887658	264.32	0.182375
Thyroid cancer	ieu-a-1082	rs2679163	2	232816237	T	G	0.2377	-2.07227	0.1175	3.53834e-82	1187	COVID-19 hospitalization	T	G	0.3751	0.01711	0.020996	0.4151	1887658	311.041	0.207909
Thyroid cancer	ieu-a-1082	rs26887	5	53553740	G	A	0.1822	1.93167	0.1541	3.24116e-44	1187	COVID-19 hospitalization	G	A	0.03615	0.012541	0.047862	0.7933	1887658	157.131	0.117075
Thyroid cancer	ieu-a-1082	rs2720392	7	100486035	A	C	0.3642	-0.634312	0.08724	2.71894e-13	1187	COVID-19 hospitalization	A	C	0.5033	0.009383	0.020424	0.6459	1887658	52.8658	0.042707
Thyroid cancer	ieu-a-1082	rs2722633	3	164384338	C	A	0.5178	0.603672	0.08513	1.07399e-12	1187	COVID-19 hospitalization	C	A	0.4732	-0.014412	0.018477	0.4354	1887658	50.2848	0.040707
Thyroid cancer	ieu-a-1082	rs272620	5	63815993	G	T	0.3534	0.532978	0.08958	2.29901e-09	1187	COVID-19 hospitalization	G	T	0.292	-0.018789	0.020644	0.3627	1887658	35.3994	0.029006
Thyroid cancer	ieu-a-1082	rs2802523	13	41025396	C	A	0.5852	1.98268	0.09573	1.07152e-103	1187	COVID-19 hospitalization	C	A	0.3353	0.0089775	0.019121	0.6387	1887658	428.952	0.265778
Thyroid cancer	ieu-a-1082	rs2836836	21	40389491	T	G	0.2611	-2.21183	0.1152	1.50003e-97	1187	COVID-19 hospitalization	T	G	0.4685	0.0021573	0.021555	0.9203	1887658	368.637	0.237273
Thyroid cancer	ieu-a-1082	rs28433203	1	46196813	T	G	0.09072	-2.72098	0.2341	1.28086e-49	1187	COVID-19 hospitalization	T	G	0.2482	-0.014429	0.02205	0.5129	1887658	135.098	0.102339
Thyroid cancer	ieu-a-1082	rs2844353	3	37761233	G	T	0.4991	0.565314	0.08457	2.00078e-11	1187	COVID-19 hospitalization	G	T	0.3838	0.032766	0.021794	0.1327	1887658	44.6835	0.036337
Thyroid cancer	ieu-a-1082	rs2866442	4	78558585	G	T	0.7066	1.83822	0.103	5.43125e-79	1187	COVID-19 hospitalization	G	T	0.5245	0.023485	0.020023	0.2408	1887658	318.508	0.211843
Thyroid cancer	ieu-a-1082	rs2867803	7	75284941	A	C	0.4428	-0.481429	0.08448	1.11199e-08	1187	COVID-19 hospitalization	A	C	0.4636	0.0079614	0.020545	0.6984	1887658	32.4756	0.026675
Thyroid cancer	ieu-a-1082	rs2870132	20	38569980	A	C	0.1934	-0.584113	0.1066	3.39797e-08	1187	COVID-19 hospitalization	A	C	0.238	0.0042011	0.024818	0.8656	1887658	30.0247	0.024711
Thyroid cancer	ieu-a-1082	rs2885280	12	73412222	A	C	0.2278	-0.59602	0.1008	2.65601e-09	1187	COVID-19 hospitalization	A	C	0.2564	-0.033658	0.021002	0.109	1887658	34.9623	0.028659
Thyroid cancer	ieu-a-1082	rs2973786	5	177725209	T	G	0.4283	-2.04253	0.09622	3.33426e-109	1187	COVID-19 hospitalization	T	G	0.6903	0.03156	0.02196	0.1507	1887658	450.616	0.275502
Thyroid cancer	ieu-a-1082	rs2981073	8	123467576	C	A	0.3802	0.53883	0.08884	1.119e-09	1187	COVID-19 hospitalization	C	A	0.3558	0.0174	0.021723	0.4231	1887658	36.7863	0.030109
Thyroid cancer	ieu-a-1082	rs3101528	8	107658187	G	T	0.7392	2.07545	0.1128	4.04017e-88	1187	COVID-19 hospitalization	G	T	0.5142	0.006838	0.02031	0.7364	1887658	338.537	0.222205
Thyroid cancer	ieu-a-1082	rs3594	8	30535660	A	C	0.3292	-0.644167	0.08906	3.47136e-13	1187	COVID-19 hospitalization	A	C	0.3976	0.00010263	0.02202	0.9963	1887658	52.3156	0.042282
Thyroid cancer	ieu-a-1082	rs3745720	19	48836082	C	A	0.5349	0.617483	0.08453	2.19079e-13	1187	COVID-19 hospitalization	C	A	0.4296	-0.004832	0.018442	0.7933	1887658	53.3615	0.04309
Thyroid cancer	ieu-a-1082	rs3829647	19	52216563	G	T	0.6535	0.491023	0.08798	2.16202e-08	1187	COVID-19 hospitalization	G	T	0.537	0.0029116	0.020828	0.8888	1887658	31.1484	0.025612
Thyroid cancer	ieu-a-1082	rs4143816	10	50899856	T	G	0.7455	1.974	0.1095	2.92617e-83	1187	COVID-19 hospitalization	T	G	0.5015	-0.030093	0.01823	0.0988	1887658	324.987	0.215225
Thyroid cancer	ieu-a-1082	rs4148124	21	43698255	C	A	0.6535	0.700978	0.08845	1.50314e-15	1187	COVID-19 hospitalization	C	A	0.5196	0.024393	0.021086	0.2473	1887658	62.8077	0.050334
Thyroid cancer	ieu-a-1082	rs4233904	2	12037951	C	A	0.7303	0.626049	0.09423	2.25216e-11	1187	COVID-19 hospitalization	C	A	0.6642	0.00040459	0.021597	0.9851	1887658	44.1406	0.035912
Thyroid cancer	ieu-a-1082	rs4269220	4	185259670	G	T	0.5791	0.486458	0.0857	1.253e-08	1187	COVID-19 hospitalization	G	T	0.4439	-0.00997	0.020769	0.6312	1887658	32.2203	0.02647
Thyroid cancer	ieu-a-1082	rs4332846	19	41058802	A	C	0.5443	-0.583332	0.08519	6.21012e-12	1187	COVID-19 hospitalization	A	C	0.6364	0.041004	0.019019	0.03109	1887658	46.8872	0.038061
Thyroid cancer	ieu-a-1082	rs4336409	5	153093323	T	G	0.3887	-0.500545	0.08621	5.77497e-09	1187	COVID-19 hospitalization	T	G	0.5028	-0.0044728	0.018461	0.8086	1887658	33.7109	0.027661
Thyroid cancer	ieu-a-1082	rs4648935	1	24466035	T	G	0.3463	-0.689952	0.08918	7.01617e-15	1187	COVID-19 hospitalization	T	G	0.4593	0.028373	0.0207	0.1705	1887658	59.8553	0.048082
Thyroid cancer	ieu-a-1082	rs4658359	1	89847372	T	G	0.8659	2.26433	0.1609	1.39701e-59	1187	COVID-19 hospitalization	T	G	0.7598	-0.014575	0.020663	0.4806	1887658	198.047	0.143196
Thyroid cancer	ieu-a-1082	rs4679695	3	152687097	C	A	0.5666	0.559841	0.085	3.82913e-11	1187	COVID-19 hospitalization	C	A	0.6081	-0.0088905	0.018801	0.6363	1887658	43.3802	0.035315
Thyroid cancer	ieu-a-1082	rs4709487	6	161487794	T	G	0.1348	-0.755023	0.1259	1.10999e-09	1187	COVID-19 hospitalization	T	G	0.1884	0.0021507	0.023301	0.9265	1887658	35.9641	0.029455
Thyroid cancer	ieu-a-1082	rs4721443	7	15528256	G	T	0.804	0.685774	0.1056	5.39511e-11	1187	COVID-19 hospitalization	G	T	0.781	0.0029075	0.024677	0.9062	1887658	42.173	0.034366
Thyroid cancer	ieu-a-1082	rs4760566	12	129200924	C	A	0.8155	0.60991	0.1081	1.25499e-08	1187	COVID-19 hospitalization	C	A	0.7764	0.022396	0.023927	0.3493	1887658	31.8332	0.026161
Thyroid cancer	ieu-a-1082	rs4766901	12	118866406	T	G	0.4843	-0.496923	0.08493	4.44795e-09	1187	COVID-19 hospitalization	T	G	0.4774	-0.0022573	0.019132	0.9061	1887658	34.2339	0.028078
Thyroid cancer	ieu-a-1082	rs4768352	12	41794490	T	G	0.3316	-0.621199	0.08952	3.04018e-12	1187	COVID-19 hospitalization	T	G	0.4548	0.00579	0.021322	0.786	1887658	48.1528	0.039049
Thyroid cancer	ieu-a-1082	rs4808027	19	16171361	G	T	0.23	0.614645	0.1043	2.88403e-09	1187	COVID-19 hospitalization	G	T	0.1717	0.010383	0.024455	0.6711	1887658	34.728	0.028472
Thyroid cancer	ieu-a-1082	rs4882110	11	48558249	T	G	0.4655	-0.600386	0.08493	1.2659e-12	1187	COVID-19 hospitalization	T	G	0.5725	-0.016789	0.01857	0.366	1887658	49.9734	0.040465
Thyroid cancer	ieu-a-1082	rs4884522	13	53053768	A	C	0.5282	0.694548	0.08585	4.19662e-16	1187	COVID-19 hospitalization	A	C	0.4316	-0.0095587	0.021671	0.6592	1887658	65.4522	0.052343
Thyroid cancer	ieu-a-1082	rs4886485	15	76531520	C	A	0.4774	0.511026	0.08451	1.29601e-09	1187	COVID-19 hospitalization	C	A	0.4103	0.0061896	0.021663	0.7751	1887658	36.5654	0.029933
Thyroid cancer	ieu-a-1082	rs4896219	6	137079542	A	C	0.4167	-0.540941	0.08547	2.13201e-10	1187	COVID-19 hospitalization	A	C	0.5092	-0.015342	0.018308	0.402	1887658	40.0564	0.032698
Thyroid cancer	ieu-a-1082	rs4922081	8	19536790	A	C	0.2111	-2.08586	0.1254	8.20729e-75	1187	COVID-19 hospitalization	A	C	0.3664	-0.032016	0.01876	0.08789	1887658	276.678	0.189288
Thyroid cancer	ieu-a-1082	rs546583	1	57614330	C	A	0.5329	0.562997	0.08451	2.29509e-11	1187	COVID-19 hospitalization	C	A	0.3849	0.028503	0.022004	0.1952	1887658	44.3809	0.0361
Thyroid cancer	ieu-a-1082	rs550201	18	43341772	C	A	0.3326	-1.99437	0.1013	4.38531e-96	1187	COVID-19 hospitalization	C	A	0.5676	-0.01129	0.020655	0.5847	1887658	387.608	0.246475
Thyroid cancer	ieu-a-1082	rs5749581	22	33624845	A	C	0.5209	-0.617345	0.08496	2.90469e-13	1187	COVID-19 hospitalization	A	C	0.6405	0.00095231	0.021786	0.9651	1887658	52.7991	0.042656
Thyroid cancer	ieu-a-1082	rs576070	5	31385490	T	G	0.2377	-2.01741	0.1127	2.06681e-83	1187	COVID-19 hospitalization	T	G	0.5105	0.022558	0.020858	0.2795	1887658	320.435	0.212852
Thyroid cancer	ieu-a-1082	rs6046115	20	19449317	T	G	0.4625	-0.67119	0.08508	2.23512e-15	1187	COVID-19 hospitalization	T	G	0.58	0.013211	0.019115	0.4895	1887658	62.2352	0.049899
Thyroid cancer	ieu-a-1082	rs6060124	20	33536897	A	C	0.1651	-0.756513	0.1134	1.35613e-11	1187	COVID-19 hospitalization	A	C	0.2725	0.0077023	0.020508	0.7072	1887658	44.5048	0.036197
Thyroid cancer	ieu-a-1082	rs630573	11	88650737	C	A	0.708	0.604221	0.09198	3.95822e-11	1187	COVID-19 hospitalization	C	A	0.5296	0.01718	0.018435	0.3514	1887658	43.1524	0.035136
Thyroid cancer	ieu-a-1082	rs630695	6	117252759	G	T	0.1366	-0.770244	0.1228	1.87202e-10	1187	COVID-19 hospitalization	G	T	0.213	-0.010094	0.023322	0.6652	1887658	39.3423	0.032133
Thyroid cancer	ieu-a-1082	rs638335	1	78527876	T	G	0.7619	-1.40143	0.1176	1.09396e-35	1187	COVID-19 hospitalization	T	G	0.889	0.050905	0.028747	0.07659	1887658	142.013	0.107017
Thyroid cancer	ieu-a-1082	rs6430168	2	148121393	G	T	0.7732	0.626424	0.09948	2.223e-10	1187	COVID-19 hospitalization	G	T	0.7681	-0.038706	0.024836	0.1191	1887658	39.652	0.032378
Thyroid cancer	ieu-a-1082	rs6471521	8	96112796	C	A	0.6766	0.535973	0.08988	2.121e-09	1187	COVID-19 hospitalization	C	A	0.5438	0.004714	0.021244	0.8244	1887658	35.5598	0.029134
Thyroid cancer	ieu-a-1082	rs6478287	9	119947461	G	T	0.6341	2.05338	0.09882	3.80189e-106	1187	COVID-19 hospitalization	G	T	0.4444	0.0012477	0.021468	0.9537	1887658	431.767	0.267056
Thyroid cancer	ieu-a-1082	rs6487825	12	29590845	G	T	0.6451	1.92758	0.09625	1.02802e-97	1187	COVID-19 hospitalization	G	T	0.4211	-0.025422	0.02124	0.2313	1887658	401.073	0.252872
Thyroid cancer	ieu-a-1082	rs6498272	16	12342674	T	G	0.6923	0.604404	0.09119	2.66624e-11	1187	COVID-19 hospitalization	T	G	0.5873	0.023415	0.021901	0.285	1887658	43.9299	0.035746
Thyroid cancer	ieu-a-1082	rs6505863	18	13974987	C	A	0.7157	0.71335	0.09359	1.52195e-14	1187	COVID-19 hospitalization	C	A	0.5496	-0.0015829	0.020447	0.9383	1887658	58.096	0.046735
Thyroid cancer	ieu-a-1082	rs6516819	21	29510893	G	T	0.5802	0.586088	0.08564	6.35331e-12	1187	COVID-19 hospitalization	G	T	0.4823	-0.0024952	0.021407	0.9072	1887658	46.8352	0.038021
Thyroid cancer	ieu-a-1082	rs6532146	4	90166778	A	C	0.2757	-2.13707	0.1116	2.71269e-95	1187	COVID-19 hospitalization	A	C	0.513	-0.016136	0.021403	0.4509	1887658	366.698	0.236321
Thyroid cancer	ieu-a-1082	rs6533109	4	104722062	C	A	0.5615	-0.492865	0.0858	8.31706e-09	1187	COVID-19 hospitalization	C	A	0.6261	0.0083817	0.021717	0.6995	1887658	32.9975	0.027092
Thyroid cancer	ieu-a-1082	rs6540082	16	87842141	T	G	0.5964	-0.491031	0.08694	1.45201e-08	1187	COVID-19 hospitalization	T	G	0.6301	-0.0057272	0.022113	0.7956	1887658	31.8991	0.026213
Thyroid cancer	ieu-a-1082	rs6546667	2	71313262	G	A	0.541	0.694148	0.08459	1.58891e-16	1187	COVID-19 hospitalization	G	A	0.4496	0.015949	0.0207	0.441	1887658	67.3389	0.053771
Thyroid cancer	ieu-a-1082	rs6565631	17	77866952	C	A	0.7751	0.601115	0.09994	1.38899e-09	1187	COVID-19 hospitalization	C	A	0.7642	-0.0035586	0.021614	0.8692	1887658	36.1773	0.029625
Thyroid cancer	ieu-a-1082	rs6584869	10	110225049	C	A	0.7131	0.640365	0.09282	3.81681e-12	1187	COVID-19 hospitalization	C	A	0.6908	-0.017892	0.019969	0.3703	1887658	47.5962	0.038615
Thyroid cancer	ieu-a-1082	rs6670601	1	192758615	C	A	0.5611	0.474333	0.08456	1.85699e-08	1187	COVID-19 hospitalization	C	A	0.4366	0.038704	0.018896	0.04053	1887658	31.4657	0.025866
Thyroid cancer	ieu-a-1082	rs678476	1	5347979	A	C	0.321	-0.637902	0.09004	1.02306e-12	1187	COVID-19 hospitalization	A	C	0.4674	-0.058162	0.019315	0.002602	1887658	50.1923	0.040635
Thyroid cancer	ieu-a-1082	rs6793262	3	17923381	G	T	0.5909	1.35712	0.08969	7.56833e-54	1187	COVID-19 hospitalization	G	T	0.4715	-0.026761	0.021404	0.2112	1887658	228.954	0.161925
Thyroid cancer	ieu-a-1082	rs6827297	4	135554935	G	T	0.728	0.721547	0.09454	1.38007e-14	1187	COVID-19 hospitalization	G	T	0.7027	-0.026836	0.019506	0.1689	1887658	58.2503	0.046853
Thyroid cancer	ieu-a-1082	rs6828245	4	25993373	A	C	0.3991	-0.69535	0.08646	6.04088e-16	1187	COVID-19 hospitalization	A	C	0.4858	0.01361	0.021103	0.519	1887658	64.681	0.051758
Thyroid cancer	ieu-a-1082	rs6870385	5	27559659	C	A	0.6872	0.501536	0.08994	2.174e-08	1187	COVID-19 hospitalization	C	A	0.65	-0.016653	0.019063	0.3824	1887658	31.0956	0.02557
Thyroid cancer	ieu-a-1082	rs6937429	6	66021416	G	T	0.6614	0.531369	0.08824	1.48799e-09	1187	COVID-19 hospitalization	G	T	0.6023	-0.020439	0.018771	0.2762	1887658	36.2628	0.029693
Thyroid cancer	ieu-a-1082	rs6946868	7	83795479	C	A	0.2749	-2.01741	0.1086	3.50671e-88	1187	COVID-19 hospitalization	C	A	0.507	-0.010913	0.018884	0.5633	1887658	345.087	0.225534
Thyroid cancer	ieu-a-1082	rs6949292	7	16440023	A	C	0.2968	-0.537341	0.09206	4.55198e-09	1187	COVID-19 hospitalization	A	C	0.411	-0.00055401	0.019271	0.9771	1887658	34.0689	0.027947
Thyroid cancer	ieu-a-1082	rs6951443	7	66672143	A	C	0.5835	-0.528273	0.08707	1.13999e-09	1187	COVID-19 hospitalization	A	C	0.573	0.0053514	0.021648	0.8048	1887658	36.8112	0.030128
Thyroid cancer	ieu-a-1082	rs698171	5	127156760	C	A	0.5923	1.91122	0.09431	6.95665e-99	1187	COVID-19 hospitalization	C	A	0.2944	0.016237	0.023329	0.4864	1887658	410.682	0.257371
Thyroid cancer	ieu-a-1082	rs6984781	8	13613335	G	T	0.2732	0.622725	0.09803	1.58701e-10	1187	COVID-19 hospitalization	G	T	0.1801	-0.007375	0.02266	0.7448	1887658	40.3529	0.032932
Thyroid cancer	ieu-a-1082	rs7034893	9	5494438	C	T	0.1582	-1.93033	0.1346	4.67197e-56	1187	COVID-19 hospitalization	C	T	0.2879	-0.0057701	0.022427	0.797	1887658	205.671	0.147893
Thyroid cancer	ieu-a-1082	rs711943	3	135110411	C	A	0.5215	0.461718	0.08438	4.142e-08	1187	COVID-19 hospitalization	C	A	0.5808	-0.020604	0.021537	0.3387	1887658	29.9416	0.024644
Thyroid cancer	ieu-a-1082	rs7186875	16	55883761	C	A	0.7331	0.578391	0.09559	1.16399e-09	1187	COVID-19 hospitalization	C	A	0.7307	-0.0085582	0.022929	0.709	1887658	36.6116	0.02997
Thyroid cancer	ieu-a-1082	rs7188594	16	83214480	A	C	0.3056	-0.563523	0.09117	5.25497e-10	1187	COVID-19 hospitalization	A	C	0.3819	0.004708	0.021518	0.8268	1887658	38.2049	0.031233
Thyroid cancer	ieu-a-1082	rs7234149	18	31285269	C	A	0.7336	1.91596	0.108	1.02589e-79	1187	COVID-19 hospitalization	C	A	0.5853	0.010274	0.020667	0.6191	1887658	314.721	0.209853
Thyroid cancer	ieu-a-1082	rs7294444	12	13101454	T	G	0.4271	-0.63036	0.08486	8.53493e-14	1187	COVID-19 hospitalization	T	G	0.6156	-0.017295	0.021523	0.4216	1887658	55.1787	0.044493
Thyroid cancer	ieu-a-1082	rs7301555	12	85399747	T	G	0.06687	-3.81263	0.4569	2.86484e-43	1187	COVID-19 hospitalization	T	G	0.1688	0.016991	0.028863	0.5561	1887658	69.6317	0.0555
Thyroid cancer	ieu-a-1082	rs7528076	1	218361784	A	C	0.365	-0.568278	0.08718	5.91834e-11	1187	COVID-19 hospitalization	A	C	0.3731	0.057927	0.021851	0.008026	1887658	42.4901	0.034615
Thyroid cancer	ieu-a-1082	rs754038	10	71300334	C	A	0.5172	1.29755	0.08914	1.04689e-49	1187	COVID-19 hospitalization	C	A	0.3781	0.038239	0.021711	0.07819	1887658	211.886	0.151685
Thyroid cancer	ieu-a-1082	rs7623609	3	133887637	T	G	0.6773	0.492167	0.08971	3.67401e-08	1187	COVID-19 hospitalization	T	G	0.5308	0.004516	0.020676	0.8271	1887658	30.0984	0.02477
Thyroid cancer	ieu-a-1082	rs7735978	5	103376332	A	C	0.1176	-2.56525	0.1992	5.06407e-56	1187	COVID-19 hospitalization	A	C	0.2173	0.0013498	0.022656	0.9525	1887658	165.837	0.122766
Thyroid cancer	ieu-a-1082	rs7781839	7	144277757	A	C	0.5728	-0.489193	0.0858	1.06101e-08	1187	COVID-19 hospitalization	A	C	0.5735	-0.012281	0.021087	0.5603	1887658	32.5077	0.0267
Thyroid cancer	ieu-a-1082	rs7823055	8	55511676	T	G	0.3783	-1.84137	0.09437	1.16788e-91	1187	COVID-19 hospitalization	T	G	0.5683	0.0087674	0.021636	0.6853	1887658	380.727	0.243163
Thyroid cancer	ieu-a-1082	rs7848973	9	100588839	G	A	0.527	-0.555034	0.08441	4.12477e-11	1187	COVID-19 hospitalization	G	A	0.6023	-0.0084651	0.018343	0.6444	1887658	43.2366	0.035202
Thyroid cancer	ieu-a-1082	rs7849585	9	139111870	T	G	0.2498	-0.621943	0.09684	9.93802e-11	1187	COVID-19 hospitalization	T	G	0.3237	-0.02386	0.019334	0.2172	1887658	41.2469	0.033637
Thyroid cancer	ieu-a-1082	rs7858672	9	2224135	G	T	0.6538	0.523911	0.08892	3.36403e-09	1187	COVID-19 hospitalization	G	T	0.4735	0.0034477	0.020543	0.8667	1887658	34.7149	0.028462
Thyroid cancer	ieu-a-1082	rs7866443	9	119179876	A	C	0.1795	-0.622689	0.1092	8.72007e-09	1187	COVID-19 hospitalization	A	C	0.2485	-0.026127	0.023958	0.2755	1887658	32.516	0.026707
Thyroid cancer	ieu-a-1082	rs7869617	9	113060439	C	A	0.5094	0.47965	0.08421	1.12899e-08	1187	COVID-19 hospitalization	C	A	0.4269	-0.0042749	0.018498	0.8172	1887658	32.443	0.026649
Thyroid cancer	ieu-a-1082	rs7904993	10	13863721	C	T	0.2352	1.36226	0.1168	4.46889e-34	1187	COVID-19 hospitalization	C	T	0.142	0.021183	0.028239	0.4532	1887658	136.03	0.102973
Thyroid cancer	ieu-a-1082	rs7907903	10	1765025	T	G	0.5648	-0.599386	0.08663	3.76964e-12	1187	COVID-19 hospitalization	T	G	0.6719	-0.028372	0.019272	0.141	1887658	47.8714	0.038829
Thyroid cancer	ieu-a-1082	rs7985861	13	69598658	A	C	0.3475	-0.606236	0.08811	4.70544e-12	1187	COVID-19 hospitalization	A	C	0.3221	-0.009313	0.019226	0.6281	1887658	47.3405	0.038415
Thyroid cancer	ieu-a-1082	rs7998196	13	91515582	G	T	0.6353	-0.657002	0.09026	2.41991e-13	1187	COVID-19 hospitalization	G	T	0.7486	0.0011758	0.02273	0.9587	1887658	52.9838	0.042798
Thyroid cancer	ieu-a-1082	rs8007859	14	69704553	T	G	0.6104	0.542144	0.08611	2.651e-10	1187	COVID-19 hospitalization	T	G	0.6249	0.035841	0.019059	0.06004	1887658	39.6389	0.032368
Thyroid cancer	ieu-a-1082	rs8019424	14	22491095	G	T	0.5314	0.61804	0.08528	3.3861e-13	1187	COVID-19 hospitalization	G	T	0.5219	0.039115	0.018441	0.03392	1887658	52.5217	0.042441
Thyroid cancer	ieu-a-1082	rs8062459	16	88934674	G	A	0.122	2.82197	0.2692	7.6542e-43	1187	COVID-19 hospitalization	G	A	0.02224	0.04322	0.060646	0.4761	1887658	109.889	0.084864
Thyroid cancer	ieu-a-1082	rs8076927	17	60171809	G	T	0.5835	0.472567	0.08544	2.94002e-08	1187	COVID-19 hospitalization	G	T	0.5854	0.024399	0.020563	0.2354	1887658	30.5917	0.025166
Thyroid cancer	ieu-a-1082	rs8095811	18	2419068	G	T	0.05434	-2.12528	0.2471	6.03532e-24	1187	COVID-19 hospitalization	G	T	0.1426	0.0082799	0.026683	0.7563	1887658	73.9753	0.058758
Thyroid cancer	ieu-a-1082	rs825770	5	138115219	G	T	0.7904	0.599111	0.1021	3.378e-09	1187	COVID-19 hospitalization	G	T	0.6787	-0.018589	0.023659	0.4321	1887658	34.4321	0.028236
Thyroid cancer	ieu-a-1082	rs886856	20	52556084	G	T	0.2842	-0.567572	0.09254	7.01197e-10	1187	COVID-19 hospitalization	G	T	0.3701	-0.021633	0.021435	0.3129	1887658	37.6169	0.030768
Thyroid cancer	ieu-a-1082	rs895649	11	119751585	G	A	0.3754	1.18111	0.0962	3.95913e-36	1187	COVID-19 hospitalization	G	A	0.4378	0.02932	0.021494	0.1725	1887658	150.741	0.112852
Thyroid cancer	ieu-a-1082	rs9289086	3	117425366	C	A	0.3285	0.65959	0.09295	8.93923e-13	1187	COVID-19 hospitalization	C	A	0.1827	-0.038827	0.025542	0.1285	1887658	50.3558	0.040762
Thyroid cancer	ieu-a-1082	rs9290550	3	175096546	T	G	0.25	-0.603489	0.09614	2.64801e-10	1187	COVID-19 hospitalization	T	G	0.3345	0.028649	0.02191	0.191	1887658	39.4031	0.032181
Thyroid cancer	ieu-a-1082	rs9294379	6	88152535	A	C	0.74	2.1698	0.1138	8.12082e-96	1187	COVID-19 hospitalization	A	C	0.5583	-0.032469	0.01836	0.07698	1887658	363.542	0.234764
Thyroid cancer	ieu-a-1082	rs9297398	8	108647423	C	A	0.2131	-2.01741	0.1195	1.45111e-75	1187	COVID-19 hospitalization	C	A	0.3624	0.027842	0.020986	0.1846	1887658	285.005	0.19388
Thyroid cancer	ieu-a-1082	rs929958	4	37769060	A	C	0.4672	-0.474494	0.08412	1.55901e-08	1187	COVID-19 hospitalization	A	C	0.5593	-0.0066233	0.020385	0.7453	1887658	31.8173	0.026148
Thyroid cancer	ieu-a-1082	rs9325969	22	49215103	T	G	0.4614	-0.501536	0.08487	3.11903e-09	1187	COVID-19 hospitalization	T	G	0.5773	7.8302e-05	0.020635	0.997	1887658	34.9217	0.028626
Thyroid cancer	ieu-a-1082	rs9344740	6	88619412	T	G	0.5823	-0.581657	0.08668	1.60214e-11	1187	COVID-19 hospitalization	T	G	0.7012	-0.010225	0.021836	0.6396	1887658	45.0294	0.036608
Thyroid cancer	ieu-a-1082	rs9350030	6	17122836	G	T	0.3271	0.604316	0.09255	5.19159e-11	1187	COVID-19 hospitalization	G	T	0.2243	0.055843	0.02341	0.01706	1887658	42.6359	0.03473
Thyroid cancer	ieu-a-1082	rs935990	11	133089795	C	A	0.6852	0.733761	0.09027	2.55682e-16	1187	COVID-19 hospitalization	C	A	0.576	0.013063	0.021747	0.5481	1887658	66.0727	0.052813
Thyroid cancer	ieu-a-1082	rs9386492	6	106368709	A	C	0.3493	-0.481591	0.08765	3.57602e-08	1187	COVID-19 hospitalization	A	C	0.4421	0.036206	0.018505	0.0504	1887658	30.1893	0.024843
Thyroid cancer	ieu-a-1082	rs9406232	6	9079324	A	C	0.3315	-0.529159	0.08864	2.05698e-09	1187	COVID-19 hospitalization	A	C	0.3596	-0.022314	0.02168	0.3034	1887658	35.638	0.029196
Thyroid cancer	ieu-a-1082	rs9464641	6	14038947	G	T	0.1779	2.08989	0.1644	2.32006e-47	1187	COVID-19 hospitalization	G	T	0.04634	0.075877	0.044782	0.09019	1887658	161.601	0.120006
Thyroid cancer	ieu-a-1082	rs950275	10	49897219	A	C	0.2718	-0.869407	0.09534	2.64789e-20	1187	COVID-19 hospitalization	A	C	0.274	0.0012665	0.019928	0.9493	1887658	83.1565	0.065573
Thyroid cancer	ieu-a-1082	rs9516234	13	94100353	C	A	0.7173	0.654504	0.09342	1.72982e-12	1187	COVID-19 hospitalization	C	A	0.6443	0.00056998	0.018956	0.976	1887658	49.0846	0.039774
Thyroid cancer	ieu-a-1082	rs9537154	13	56100889	A	C	0.2007	-0.578569	0.1041	2.20201e-08	1187	COVID-19 hospitalization	A	C	0.2658	-0.037518	0.020659	0.06936	1887658	30.8894	0.025405
Thyroid cancer	ieu-a-1082	rs9547491	13	36947826	G	T	0.6858	0.543693	0.0897	1.15499e-09	1187	COVID-19 hospitalization	G	T	0.6403	-0.01042	0.021407	0.6264	1887658	36.7386	0.030071
Thyroid cancer	ieu-a-1082	rs9655048	7	5167160	A	C	0.3583	-0.594026	0.08777	1.05196e-11	1187	COVID-19 hospitalization	A	C	0.4405	-0.017457	0.021684	0.4208	1887658	45.8056	0.037216
Thyroid cancer	ieu-a-1082	rs971732	2	50142117	C	A	0.2351	-2.13877	0.1195	1.0639e-85	1187	COVID-19 hospitalization	C	A	0.3678	0.011984	0.019422	0.5372	1887658	320.326	0.212795
Thyroid cancer	ieu-a-1082	rs9824256	3	113815108	C	A	0.6534	0.507498	0.08745	5.77697e-09	1187	COVID-19 hospitalization	C	A	0.6457	0.00099786	0.018917	0.9579	1887658	33.6782	0.027635
Thyroid cancer	ieu-a-1082	rs9869760	3	119233558	A	C	0.2937	-2.0526	0.1062	8.74178e-95	1187	COVID-19 hospitalization	A	C	0.5904	0.033813	0.018674	0.07019	1887658	373.559	0.239682
Thyroid cancer	ieu-a-1082	rs9889777	17	49336793	C	A	0.6923	0.514834	0.09111	1.39901e-08	1187	COVID-19 hospitalization	C	A	0.5621	0.036954	0.020878	0.07673	1887658	31.9303	0.026238
Thyroid cancer	ieu-a-1082	rs9988716	10	82715404	A	C	0.1627	-0.673737	0.113	1.639e-09	1187	COVID-19 hospitalization	A	C	0.2278	0.0032695	0.022572	0.8848	1887658	35.5487	0.029125
Ovarian cancer	ieu-a-1120	rs10962691	9	16915105	G	C	0.2026	-0.2133	0.01698	1.72783e-36	66450	COVID-19 hospitalization	G	C	0.217	-0.0019102	0.023125	0.9342	1887658	157.8	0.002369
Ovarian cancer	ieu-a-1120	rs115478735	9	136149711	T	A	0.1936	0.09941	0.01672	2.80098e-09	66450	COVID-19 hospitalization	T	A	0.196	0.11711	0.026556	1.034e-05	1887658	35.3499	0.000532
Ovarian cancer	ieu-a-1120	rs11782652	8	82653644	G	A	0.06811	0.1524	0.02508	1.25101e-09	66450	COVID-19 hospitalization	G	A	0.06716	-0.032534	0.035368	0.3576	1887658	36.9245	0.000555
Ovarian cancer	ieu-a-1120	rs12952824	17	46478195	A	C	0.2171	0.1033	0.0157	4.91021e-11	66450	COVID-19 hospitalization	A	C	0.2224	0.013497	0.021941	0.5385	1887658	43.2914	0.000651
Ovarian cancer	ieu-a-1120	rs4808075	19	17390291	C	T	0.296	0.1224	0.01437	1.53886e-17	66450	COVID-19 hospitalization	C	T	0.3013	0.014357	0.02019	0.477	1887658	72.552	0.001091
Ovarian cancer	ieu-a-1120	rs62276619	3	156397692	T	C	0.04882	0.37	0.0284	5.53478e-39	66450	COVID-19 hospitalization	T	C	0.06898	-0.023703	0.044093	0.5909	1887658	169.733	0.002548
Ovarian cancer	ieu-a-1120	rs6496746	15	91532869	A	C	0.1762	-0.095	0.01735	4.18398e-08	66450	COVID-19 hospitalization	A	C	0.1834	-0.0088892	0.023519	0.7055	1887658	29.9811	0.000451
Ovarian cancer	ieu-a-1120	rs7084454	10	21821274	A	G	0.3279	0.08833	0.01395	2.40802e-10	66450	COVID-19 hospitalization	A	G	0.313	0.0078978	0.019223	0.6812	1887658	40.093	0.000603
Ovarian cancer	ieu-a-1120	rs71238846	17	43552537	A	G	0.1825	0.1269	0.01693	6.59022e-14	66450	COVID-19 hospitalization	A	G	0.1366	-0.078231	0.023761	0.0009932	1887658	56.1836	0.000845
Melanoma	ieu-b-4969	rs11120349	1	214718513	T	A	0.20584	-0.00165893	0.000285342	6.1e-09	375767	COVID-19 hospitalization	T	A	0.188	-0.039281	0.024955	0.1155	1887658	33.8006	8.99e-05
Melanoma	ieu-b-4969	rs1126809	11	89017961	A	G	0.302059	0.00203828	0.000250011	3.59998e-16	375767	COVID-19 hospitalization	A	G	0.267	-0.023381	0.020514	0.2544	1887658	66.4675	0.000177
Melanoma	ieu-b-4969	rs183783391	3	69950451	T	C	0.013683	0.00693872	0.0010097	6.29941e-12	375767	COVID-19 hospitalization	T	C	0.01199	-0.038512	0.1039	0.7109	1887658	47.2252	0.000126
Melanoma	ieu-b-4969	rs6059655	20	32665748	G	A	0.898713	-0.00383327	0.000386784	3.69999e-23	375767	COVID-19 hospitalization	G	A	0.931	-0.045313	0.041685	0.277	1887658	98.2204	0.000261
Melanoma	ieu-b-4969	rs74415461	16	89990843	T	C	0.084956	0.00387347	0.000413323	7.10068e-21	375767	COVID-19 hospitalization	T	C	0.09266	-0.038797	0.03666	0.2899	1887658	87.8256	0.000234
Melanoma	ieu-b-4969	rs871024	9	21803880	A	C	0.519167	-0.00189312	0.000229871	1.80011e-16	375767	COVID-19 hospitalization	A	C	0.5346	0.026906	0.02063	0.1922	1887658	67.8247	0.00018
Small bowel cancer	ukb-a-56	rs113335353	3	78658935	A	G	0.0394025	0.000763737	0.0001376	2.85213e-08	337159	COVID-19 hospitalization	A	G	0.03649	0.068315	0.05131	0.183	1887658	30.8071	9.14e-05
Small bowel cancer	ukb-a-56	rs77933629	9	113137872	T	C	0.0348044	0.000827805	0.000143209	7.45968e-09	337159	COVID-19 hospitalization	T	C	0.03499	0.057889	0.051282	0.259	1887658	33.413	9.91e-05
Colorectal cancer	ieu-b-4965	rs114717436	3	28450527	G	A	0.010823	0.00795214	0.00139467	1.2e-08	377673	COVID-19 hospitalization	G	A	0.00854	0.041949	0.10703	0.6951	1887658	32.5106	8.61e-05
Colorectal cancer	ieu-b-4965	rs12135286	1	222218761	T	C	0.193449	0.00203311	0.000354166	9.40005e-09	377673	COVID-19 hospitalization	T	C	0.2038	0.0042745	0.023591	0.8562	1887658	32.954	8.72e-05
Colorectal cancer	ieu-b-4965	rs16892766	8	117630683	C	A	0.079541	0.00305526	0.000516081	3.2e-09	377673	COVID-19 hospitalization	C	A	0.09859	-0.036834	0.034088	0.2799	1887658	35.0478	9.28e-05
Colorectal cancer	ieu-b-4965	rs3087967	11	111156836	C	T	0.69919	-0.00207534	0.000305631	1.10002e-11	377673	COVID-19 hospitalization	C	T	0.7105	-0.0015071	0.02246	0.9465	1887658	46.1088	0.000122
Colorectal cancer	ieu-b-4965	rs58658771	15	33001734	A	T	0.180335	0.00280944	0.000364099	1.20005e-14	377673	COVID-19 hospitalization	A	T	0.2034	0.0086957	0.023328	0.7093	1887658	59.5389	0.000158
Colorectal cancer	ieu-b-4965	rs6983267	8	128413305	T	G	0.482388	-0.0026797	0.00027963	9.3994e-22	377673	COVID-19 hospitalization	T	G	0.4756	-0.016327	0.018236	0.3706	1887658	91.8343	0.000243
Colorectal cancer	ieu-b-4965	rs72746180	5	40240420	C	A	0.298345	0.00170489	0.000305954	2.5e-08	377673	COVID-19 hospitalization	C	A	0.2747	-0.013704	0.020012	0.4935	1887658	31.0513	8.22e-05
Cervix cancer	ukb-b-918	rs4713462	6	31347816	A	G	0.260802	-0.00124106	0.000194121	1.6e-10	463010	COVID-19 hospitalization	A	G	0.3096	-0.0069249	0.019827	0.7269	1887658	40.8734	8.83e-05
Cervix cancer	ukb-b-918	rs9272226	6	32602396	T	C	0.631131	-0.00155897	0.000173586	2.70023e-19	463010	COVID-19 hospitalization	T	C	0.6304	0.055953	0.019678	0.004463	1887658	80.6578	0.000174

## Sheet: Table S2C
exposure	id.exposure	SNP	chr.exposure	pos.exposure	effect_allele.exposure	other_allele.exposure	eaf.exposure	beta.exposure	se.exposure	pval.exposure	samplesize.exposure	outcome	effect_allele.outcome	other_allele.outcome	eaf.outcome	beta.outcome	se.outcome	pval.outcome	samplesize.outcome	F	R2
Overall cancer	ukb-a-307	rs1126809	11	89017961	A	G	0.304801	0.0042007	0.000714901	4.20911e-09	336272	COVID-19 susceptibility	A	G	0.2719	-0.0054041	0.010595	0.61	1683768	34.5264	0.000102664
Overall cancer	ukb-a-307	rs2981575	10	123346116	A	G	0.60559	-0.00463491	0.000672203	5.39138e-12	336272	COVID-19 susceptibility	A	G	0.5904	0.003801	0.0098362	0.6992	1683768	47.5425	0.000141362
Overall cancer	ukb-a-307	rs3769823	2	202122995	G	A	0.718859	-0.00442606	0.000730123	1.34527e-09	336272	COVID-19 susceptibility	G	A	0.6958	-0.019723	0.010329	0.0562	1683768	36.7487	0.000109272
Overall cancer	ukb-a-307	rs8051733	16	90024206	G	A	0.347009	0.00458229	0.000691248	3.38454e-11	336272	COVID-19 susceptibility	G	A	0.3247	-0.0019408	0.010416	0.8522	1683768	43.9438	0.000130663
Lung cancer	ieu-a-966	rs11571818	13	32968810	C	T	0.0113361	0.660847	0.16686	2.63027e-12	27209	COVID-19 susceptibility	C	T	0.008682	-0.043785	0.057656	0.4476	1683768	15.6855	0.000576191
Lung cancer	ieu-a-966	rs37004	5	1356684	T	C	0.226187	-0.17209	0.019417	3.19007e-13	27209	COVID-19 susceptibility	T	C	0.2292	8.9254e-05	0.011347	0.9937	1683768	78.5501	0.00287882
Lung cancer	ieu-a-966	rs446975	3	9217383	T	G	0.115137	-0.261532	0.022649	6.41948e-18	27209	COVID-19 susceptibility	T	G	0.1403	-0.0061851	0.01397	0.6579	1683768	133.337	0.00487694
Lung cancer	ieu-a-966	rs501942	6	31840477	T	C	0.108859	0.186841	0.034137	1.47001e-10	27209	COVID-19 susceptibility	T	C	0.1116	-0.022548	0.016005	0.1589	1683768	29.9567	0.00109985
Lung cancer	ieu-a-966	rs8040868	15	78911181	C	T	0.424371	0.301974	0.024535	4.9705e-60	27209	COVID-19 susceptibility	C	T	0.3931	0.0059324	0.0096423	0.5384	1683768	151.484	0.00553701
Squamous cell lung cancer	ieu-a-967	rs27996	5	1345474	G	A	0.419351	-0.165813	0.024244	1.84001e-08	18313	COVID-19 susceptibility	G	A	0.4388	0.010134	0.0095477	0.2885	1683768	46.7766	0.00254805
Squamous cell lung cancer	ieu-a-967	rs501942	6	31840477	T	C	0.108039	0.262723	0.056353	6.74e-09	18313	COVID-19 susceptibility	T	C	0.1116	-0.022548	0.016005	0.1589	1683768	21.7351	0.00118559
Breast cancer	ieu-a-1126	rs10022462	4	89243818	T	C	0.4379	0.0375	0.0062	1.554e-09	228951	COVID-19 susceptibility	T	C	0.4411	-0.005249	0.0095707	0.5834	1683768	36.583	0.000159761
Breast cancer	ieu-a-1126	rs10096351	8	128372172	G	A	0.5441	0.1055	0.0062	1.96607e-64	228951	COVID-19 susceptibility	G	A	0.5476	0.012596	0.0094926	0.1845	1683768	289.549	0.00126309
Breast cancer	ieu-a-1126	rs10760444	9	129396434	A	G	0.5667	-0.0358	0.0062	9.05607e-09	228951	COVID-19 susceptibility	A	G	0.5526	0.0067767	0.0097566	0.4873	1683768	33.3413	0.000145606
Breast cancer	ieu-a-1126	rs10885405	10	114777670	T	C	0.46	0.0465	0.0062	5.43626e-14	228951	COVID-19 susceptibility	T	C	0.4608	-0.018025	0.0094524	0.05654	1683768	56.25	0.000245628
Breast cancer	ieu-a-1126	rs10941679	5	44706498	G	A	0.2522	0.1278	0.0071	5.6079e-73	228951	COVID-19 susceptibility	G	A	0.2596	-0.010533	0.011474	0.3586	1683768	324	0.00141316
Breast cancer	ieu-a-1126	rs10995201	10	64299890	G	A	0.1591	-0.1317	0.0087	1.55704e-51	228951	COVID-19 susceptibility	G	A	0.1708	-0.0069409	0.013668	0.6116	1683768	229.157	0.000999907
Breast cancer	ieu-a-1126	rs11117758	1	217220574	A	G	0.2086	-0.0449	0.0076	3.90301e-09	228951	COVID-19 susceptibility	A	G	0.207	0.024495	0.012959	0.05873	1683768	34.9032	0.000152427
Breast cancer	ieu-a-1126	rs11205303	1	149906413	C	T	0.3998	0.0497	0.0064	1.13894e-14	228951	COVID-19 susceptibility	C	T	0.3889	0.020465	0.0098529	0.03779	1683768	60.3049	0.00026333
Breast cancer	ieu-a-1126	rs1121948	8	129165056	G	A	0.1963	0.0575	0.0077	7.4817e-14	228951	COVID-19 susceptibility	G	A	0.1945	0.0012916	0.011987	0.9142	1683768	55.764	0.000243506
Breast cancer	ieu-a-1126	rs11462858	10	123093991	GT	G	0.3215	-0.0471	0.0067	2.08593e-12	228951	COVID-19 susceptibility	GT	G	0.3355	-0.0024278	0.01115	0.8276	1683768	49.4188	0.000215804
Breast cancer	ieu-a-1126	rs11571833	13	32972626	T	A	0.0081	0.2727	0.0346	3.10027e-15	228951	COVID-19 susceptibility	T	A	0.00863	-0.046616	0.057602	0.4184	1683768	62.1181	0.000271245
Breast cancer	ieu-a-1126	rs11583393	1	88429024	A	C	0.249	-0.0396	0.0072	3.61102e-08	228951	COVID-19 susceptibility	A	C	0.2632	-0.018284	0.01104	0.0977	1683768	30.25	0.000132108
Breast cancer	ieu-a-1126	rs11624333	14	68979835	C	T	0.2595	-0.0968	0.0071	6.5013e-42	228951	COVID-19 susceptibility	C	T	0.2676	0.00011733	0.011621	0.9919	1683768	185.881	0.000811228
Breast cancer	ieu-a-1126	rs11672660	19	46180184	T	C	0.213	0.0472	0.008	4.12601e-09	228951	COVID-19 susceptibility	T	C	0.2213	-0.016168	0.011654	0.1653	1683768	34.81	0.000152019
Breast cancer	ieu-a-1126	rs11684853	2	19310918	T	G	0.5606	-0.0442	0.0062	1.11712e-12	228951	COVID-19 susceptibility	T	G	0.5624	0.0087815	0.0094911	0.3548	1683768	50.8231	0.000221935
Breast cancer	ieu-a-1126	rs117618124	18	29977689	C	T	0.0453	-0.1074	0.0156	5.45758e-12	228951	COVID-19 susceptibility	C	T	0.06286	-0.0031523	0.022125	0.8867	1683768	47.3979	0.000206981
Breast cancer	ieu-a-1126	rs117737783	11	69079744	A	G	0.0728	0.0747	0.0127	4.03097e-09	228951	COVID-19 susceptibility	A	G	0.0905	-0.021107	0.018916	0.2645	1683768	34.5966	0.000151088
Breast cancer	ieu-a-1126	rs11822830	11	129461016	G	A	0.5959	0.0483	0.0063	1.9829e-14	228951	COVID-19 susceptibility	G	A	0.6044	0.0038741	0.0097879	0.6922	1683768	58.7778	0.000256663
Breast cancer	ieu-a-1126	rs11903787	2	121088182	A	G	0.2405	-0.0451	0.0076	2.36401e-09	228951	COVID-19 susceptibility	A	G	0.2297	0.00193	0.01207	0.873	1683768	35.2149	0.000153787
Breast cancer	ieu-a-1126	rs11977670	7	139942304	A	G	0.4315	0.0522	0.0063	1.04809e-16	228951	COVID-19 susceptibility	A	G	0.4132	0.0046846	0.0096101	0.6259	1683768	68.6531	0.000299772
Breast cancer	ieu-a-1126	rs12207986	6	81094287	A	G	0.5362	0.0375	0.0062	1.45001e-09	228951	COVID-19 susceptibility	A	G	0.5381	-0.0065452	0.0094727	0.4896	1683768	36.583	0.000159761
Breast cancer	ieu-a-1126	rs12250948	10	115128491	C	T	0.7844	-0.0576	0.0074	1.0361e-14	228951	COVID-19 susceptibility	C	T	0.7698	0.0027389	0.011909	0.8181	1683768	60.5873	0.000264562
Breast cancer	ieu-a-1126	rs1230666	1	114173410	G	A	0.8721	-0.0592	0.0095	3.86696e-10	228951	COVID-19 susceptibility	G	A	0.8387	0.0027458	0.013754	0.8418	1683768	38.8326	0.000169584
Breast cancer	ieu-a-1126	rs12479355	2	227226952	G	A	0.2088	-0.0426	0.0076	2.35798e-08	228951	COVID-19 susceptibility	G	A	0.2027	-0.0054564	0.012192	0.6545	1683768	31.419	0.000137212
Breast cancer	ieu-a-1126	rs12487185	3	30677269	G	A	0.3128	0.045	0.0066	1.20587e-11	228951	COVID-19 susceptibility	G	A	0.3257	-0.012433	0.010266	0.2259	1683768	46.4876	0.000203007
Breast cancer	ieu-a-1126	rs12513872	5	1248354	A	G	0.7485	0.0413	0.0073	1.464e-08	228951	COVID-19 susceptibility	A	G	0.7457	-0.0041129	0.011775	0.7269	1683768	32.0077	0.000139783
Breast cancer	ieu-a-1126	rs12519859	5	32581186	A	G	0.4748	0.0365	0.0063	5.76806e-09	228951	COVID-19 susceptibility	A	G	0.4746	-0.0048411	0.0097214	0.6185	1683768	33.5664	0.000146589
Breast cancer	ieu-a-1126	rs12546444	8	106358620	T	A	0.1001	-0.0717	0.011	7.45418e-11	228951	COVID-19 susceptibility	T	A	0.1095	0.007656	0.018383	0.6771	1683768	42.4867	0.000185538
Breast cancer	ieu-a-1126	rs1268974	10	80852378	G	A	0.6132	-0.0793	0.0063	3.71022e-36	228951	COVID-19 susceptibility	G	A	0.6278	-0.018524	0.010039	0.06502	1683768	158.44	0.000691554
Breast cancer	ieu-a-1126	rs12990503	2	218294217	G	C	0.7372	-0.073	0.007	9.99079e-26	228951	COVID-19 susceptibility	G	C	0.7261	0.0039465	0.010712	0.7126	1683768	108.755	0.000474793
Breast cancer	ieu-a-1126	rs13066793	3	87037543	G	A	0.0925	-0.0685	0.0112	1.037e-09	228951	COVID-19 susceptibility	G	A	0.1024	0.0060399	0.016676	0.7172	1683768	37.4063	0.000163356
Breast cancer	ieu-a-1126	rs13267382	8	117209548	G	A	0.6493	-0.0437	0.0065	1.59514e-11	228951	COVID-19 susceptibility	G	A	0.6256	0.0071532	0.010481	0.4949	1683768	45.1998	0.000197384
Breast cancer	ieu-a-1126	rs1498608	5	58343067	A	T	0.0949	-0.0671	0.0107	3.48097e-10	228951	COVID-19 susceptibility	A	T	0.09602	0.0011977	0.016012	0.9404	1683768	39.3258	0.000171737
Breast cancer	ieu-a-1126	rs1685191	19	44283232	T	C	0.5647	-0.0586	0.0064	3.87436e-20	228951	COVID-19 susceptibility	T	C	0.559	-0.017175	0.010188	0.09185	1683768	83.8369	0.000366048
Breast cancer	ieu-a-1126	rs16991615	20	5948227	A	G	0.0626	0.0758	0.0126	1.91699e-09	228951	COVID-19 susceptibility	A	G	0.06463	-0.000946	0.019326	0.961	1683768	36.1907	0.000158048
Breast cancer	ieu-a-1126	rs17185310	1	118195592	A	G	0.3034	0.0395	0.0069	8.70102e-09	228951	COVID-19 susceptibility	A	G	0.2969	-0.002235	0.011023	0.8393	1683768	32.7715	0.000143118
Breast cancer	ieu-a-1126	rs17268829	7	94113799	C	T	0.2804	0.0495	0.0068	4.48952e-13	228951	COVID-19 susceptibility	C	T	0.2805	0.0061978	0.010548	0.5568	1683768	52.9898	0.000231395
Breast cancer	ieu-a-1126	rs17426269	1	88156923	A	G	0.1488	0.0487	0.0086	1.74201e-08	228951	COVID-19 susceptibility	A	G	0.1432	0.022363	0.014108	0.1129	1683768	32.0672	0.000140043
Breast cancer	ieu-a-1126	rs1973765	11	1898664	C	T	0.4001	-0.0817	0.0064	9.7051e-38	228951	COVID-19 susceptibility	C	T	0.4024	0.0070439	0.0099917	0.4808	1683768	162.961	0.000711273
Breast cancer	ieu-a-1126	rs1985742	9	21961227	T	A	0.3516	0.0588	0.0065	8.09655e-20	228951	COVID-19 susceptibility	T	A	0.3529	0.0029761	0.010195	0.7703	1683768	81.8329	0.000357301
Breast cancer	ieu-a-1126	rs2016394	2	172972971	A	G	0.4748	-0.0425	0.0062	6.23448e-12	228951	COVID-19 susceptibility	A	G	0.4809	0.0098584	0.010206	0.3341	1683768	46.9888	0.000205195
Breast cancer	ieu-a-1126	rs2253012	14	37228504	T	C	0.4318	0.0433	0.0065	3.1268e-11	228951	COVID-19 susceptibility	T	C	0.4378	0.013507	0.010096	0.1809	1683768	44.3761	0.000193788
Breast cancer	ieu-a-1126	rs2747652	6	152437016	C	T	0.5263	0.0663	0.0062	1.30707e-26	228951	COVID-19 susceptibility	C	T	0.5552	-0.013391	0.0097768	0.1708	1683768	114.352	0.000499216
Breast cancer	ieu-a-1126	rs28512361	22	46283297	A	G	0.1127	0.0611	0.0109	2.249e-08	228951	COVID-19 susceptibility	A	G	0.1191	-0.0075279	0.017499	0.6671	1683768	31.4217	0.000137224
Breast cancer	ieu-a-1126	rs2853669	5	1295349	G	A	0.3061	-0.0651	0.0069	4.04669e-21	228951	COVID-19 susceptibility	G	A	0.289	0.0029118	0.010366	0.7788	1683768	89.0151	0.000388648
Breast cancer	ieu-a-1126	rs2992756	1	18807339	C	T	0.5194	-0.0506	0.0063	1.60398e-15	228951	COVID-19 susceptibility	C	T	0.5111	-0.01066	0.0094306	0.2583	1683768	64.5089	0.000281682
Breast cancer	ieu-a-1126	rs34195518	10	9084428	CT	C	0.1207	0.0611	0.0096	2.014e-10	228951	COVID-19 susceptibility	CT	C	0.1188	0.0042585	0.015919	0.7891	1683768	40.5079	0.000176899
Breast cancer	ieu-a-1126	rs35383942	1	201437832	T	C	0.0562	0.101	0.0139	3.79315e-13	228951	COVID-19 susceptibility	T	C	0.07402	0.0043191	0.02043	0.8326	1683768	52.7975	0.000230555
Breast cancer	ieu-a-1126	rs35961416	8	128213561	CA	C	0.4117	-0.0417	0.0066	2.712e-10	228951	COVID-19 susceptibility	CA	C	0.4104	-0.0097735	0.011447	0.3932	1683768	39.9194	0.000174329
Breast cancer	ieu-a-1126	rs3769821	2	202123430	T	C	0.6683	-0.0565	0.0065	3.96917e-18	228951	COVID-19 susceptibility	T	C	0.6597	-0.017976	0.0099728	0.07146	1683768	75.5562	0.000329904
Breast cancer	ieu-a-1126	rs3821902	3	63941697	G	T	0.1358	0.0623	0.0089	2.9902e-12	228951	COVID-19 susceptibility	G	T	0.1268	-0.013826	0.01386	0.3185	1683768	49	0.000213976
Breast cancer	ieu-a-1126	rs3903072	11	65583066	T	G	0.4727	-0.0434	0.0062	2.25424e-12	228951	COVID-19 susceptibility	T	G	0.469	-0.006685	0.0094597	0.4798	1683768	49	0.000213976
Breast cancer	ieu-a-1126	rs4081859	5	81466669	A	G	0.7517	0.0521	0.0073	7.0762e-13	228951	COVID-19 susceptibility	A	G	0.7552	-0.016979	0.011207	0.1297	1683768	50.9366	0.000222431
Breast cancer	ieu-a-1126	rs4233486	1	41380440	T	C	0.6514	0.0396	0.0069	9.08511e-09	228951	COVID-19 susceptibility	T	C	0.661	-0.0033541	0.010281	0.7442	1683768	32.9376	0.000143844
Breast cancer	ieu-a-1126	rs4286946	8	36849946	G	C	0.1739	-0.0799	0.0083	8.62581e-22	228951	COVID-19 susceptibility	G	C	0.1738	0.015328	0.012587	0.2233	1683768	92.6696	0.000404597
Breast cancer	ieu-a-1126	rs4442975	2	217920769	T	G	0.5021	-0.1274	0.0061	1.13999e-95	228951	COVID-19 susceptibility	T	G	0.5039	0.010794	0.0099671	0.2788	1683768	436.193	0.00190158
Breast cancer	ieu-a-1126	rs4496150	16	87085237	A	C	0.2466	-0.0416	0.0072	8.09096e-09	228951	COVID-19 susceptibility	A	C	0.2485	0.0010707	0.01115	0.9235	1683768	33.3827	0.000145787
Breast cancer	ieu-a-1126	rs4562056	5	169591487	T	G	0.3323	0.0416	0.0067	4.719e-10	228951	COVID-19 susceptibility	T	G	0.3197	-0.015901	0.010347	0.1243	1683768	38.5511	0.000168355
Breast cancer	ieu-a-1126	rs4702131	5	16233619	C	T	0.5612	-0.0424	0.0062	1.00207e-11	228951	COVID-19 susceptibility	C	T	0.5662	0.00047918	0.009807	0.961	1683768	46.768	0.000204231
Breast cancer	ieu-a-1126	rs4784227	16	52599188	T	C	0.2387	0.2153	0.0071	1e-200	228951	COVID-19 susceptibility	T	C	0.2439	-0.0044294	0.011017	0.6877	1683768	919.542	0.00400029
Breast cancer	ieu-a-1126	rs4820318	22	38570313	A	G	0.3753	-0.0475	0.0064	1.02991e-13	228951	COVID-19 susceptibility	A	G	0.3754	-0.013137	0.0097231	0.1766	1683768	55.0842	0.000240538
Breast cancer	ieu-a-1126	rs4848599	2	121239360	C	T	0.8845	0.0933	0.01	1.58489e-20	228951	COVID-19 susceptibility	C	T	0.8826	-0.019952	0.016201	0.2181	1683768	87.0489	0.000380066
Breast cancer	ieu-a-1126	rs4971059	1	155148781	A	G	0.3632	0.0424	0.0064	4.82503e-11	228951	COVID-19 susceptibility	A	G	0.3836	-0.042084	0.010458	5.717e-05	1683768	43.8906	0.000191668
Breast cancer	ieu-a-1126	rs527616	18	24337424	G	C	0.6211	0.0499	0.0064	6.70039e-15	228951	COVID-19 susceptibility	G	C	0.6	0.014226	0.010435	0.1728	1683768	60.7913	0.000265453
Breast cancer	ieu-a-1126	rs56387622	3	46888198	C	T	0.1012	-0.0942	0.0106	5.46512e-19	228951	COVID-19 susceptibility	C	T	0.1034	-0.0065773	0.015642	0.6741	1683768	78.9751	0.000344827
Breast cancer	ieu-a-1126	rs56891541	5	56240748	TCC	T	0.2467	0.0535	0.0072	8.98669e-14	228951	COVID-19 susceptibility	TCC	T	0.251	-0.0053562	0.012861	0.6771	1683768	55.2132	0.000241101
Breast cancer	ieu-a-1126	rs56971155	16	53862888	T	C	0.3934	-0.0424	0.0064	3.62577e-11	228951	COVID-19 susceptibility	T	C	0.3627	-0.0072536	0.010294	0.481	1683768	43.8906	0.000191668
Breast cancer	ieu-a-1126	rs57212245	11	69280923	A	G	0.0783	-0.0652	0.0119	4.08903e-08	228951	COVID-19 susceptibility	A	G	0.08433	0.018072	0.019374	0.3509	1683768	30.0193	0.000131101
Breast cancer	ieu-a-1126	rs58058861	3	172285237	A	G	0.2172	0.0474	0.0074	1.907e-10	228951	COVID-19 susceptibility	A	G	0.2402	0.006333	0.011756	0.5901	1683768	41.0292	0.000179175
Breast cancer	ieu-a-1126	rs5995875	22	40960692	T	C	0.1068	0.1206	0.0098	9.03858e-35	228951	COVID-19 susceptibility	T	C	0.1238	0.014201	0.014992	0.3435	1683768	151.441	0.000661023
Breast cancer	ieu-a-1126	rs5997389	22	29134719	A	G	0.0903	0.0791	0.0108	2.19079e-13	228951	COVID-19 susceptibility	A	G	0.1135	-0.0085336	0.016261	0.5997	1683768	53.6421	0.000234242
Breast cancer	ieu-a-1126	rs6122906	20	48945911	G	A	0.1816	0.0507	0.008	2.44698e-10	228951	COVID-19 susceptibility	G	A	0.1903	-0.00094427	0.012824	0.9413	1683768	40.1639	0.000175397
Breast cancer	ieu-a-1126	rs62048402	16	53803223	A	G	0.4156	-0.0624	0.0063	3.50026e-23	228951	COVID-19 susceptibility	A	G	0.4172	0.01419	0.0095778	0.1384	1683768	98.1043	0.000428315
Breast cancer	ieu-a-1126	rs62331150	4	106069013	T	G	0.2263	0.0494	0.0074	1.84714e-11	228951	COVID-19 susceptibility	T	G	0.2282	-0.018523	0.012316	0.1326	1683768	44.5646	0.000194611
Breast cancer	ieu-a-1126	rs62355901	5	56053535	C	T	0.1602	0.1734	0.0082	3.41979e-98	228951	COVID-19 susceptibility	C	T	0.172	-0.0023863	0.013021	0.8546	1683768	447.168	0.00194933
Breast cancer	ieu-a-1126	rs630965	9	110885479	T	C	0.6196	0.0992	0.0064	3.20701e-54	228951	COVID-19 susceptibility	T	C	0.6298	0.018896	0.0098234	0.05441	1683768	240.25	0.00104826
Breast cancer	ieu-a-1126	rs6472903	8	76230301	T	G	0.8261	0.0778	0.0083	4.43302e-21	228951	COVID-19 susceptibility	T	G	0.8147	0.00407	0.012452	0.7438	1683768	87.8624	0.000383617
Breast cancer	ieu-a-1126	rs6562760	13	73957681	G	A	0.766	0.0443	0.0073	1.493e-09	228951	COVID-19 susceptibility	G	A	0.7764	-0.00045737	0.011302	0.9677	1683768	36.8266	0.000160825
Breast cancer	ieu-a-1126	rs6569648	6	130349119	T	C	0.7643	0.0512	0.0073	2.97577e-12	228951	COVID-19 susceptibility	T	C	0.76	0.017377	0.011079	0.1168	1683768	49.192	0.000214814
Breast cancer	ieu-a-1126	rs6596100	5	132407058	T	C	0.2427	-0.0439	0.0076	7.74194e-09	228951	COVID-19 susceptibility	T	C	0.2616	0.0024548	0.011048	0.8242	1683768	33.3658	0.000145714
Breast cancer	ieu-a-1126	rs6597981	11	803017	G	A	0.5178	0.0439	0.0062	1.34586e-12	228951	COVID-19 susceptibility	G	A	0.5452	0.00639	0.0097915	0.514	1683768	50.1355	0.000218933
Breast cancer	ieu-a-1126	rs66572733	10	22047015	G	C	0.037	0.095	0.0162	4.74198e-09	228951	COVID-19 susceptibility	G	C	0.04186	0.0080156	0.02497	0.7482	1683768	34.3888	0.00015018
Breast cancer	ieu-a-1126	rs6725517	2	25129473	G	A	0.4088	-0.0468	0.0067	2.93022e-12	228951	COVID-19 susceptibility	G	A	0.4066	-0.00018915	0.0095719	0.9842	1683768	48.7913	0.000213064
Breast cancer	ieu-a-1126	rs6787391	3	4728574	T	C	0.3807	0.0567	0.0064	9.07403e-19	228951	COVID-19 susceptibility	T	C	0.3976	-0.015615	0.010166	0.1245	1683768	78.4885	0.000342704
Breast cancer	ieu-a-1126	rs68056147	7	130674481	A	G	0.299	0.0501	0.0069	5.36043e-13	228951	COVID-19 susceptibility	A	G	0.2898	-3.4042e-05	0.011229	0.9976	1683768	52.7202	0.000230218
Breast cancer	ieu-a-1126	rs6815814	4	38816338	C	A	0.2525	0.052	0.0072	6.13056e-13	228951	COVID-19 susceptibility	C	A	0.2302	0.0097802	0.011512	0.3956	1683768	52.1605	0.000227774
Breast cancer	ieu-a-1126	rs6882649	5	111217786	T	G	0.6651	0.0388	0.0066	3.67198e-09	228951	COVID-19 susceptibility	T	G	0.6528	-0.0087431	0.011235	0.4364	1683768	34.5601	0.000150929
Breast cancer	ieu-a-1126	rs7072776	10	22032942	G	A	0.7124	-0.0618	0.0068	1.74904e-19	228951	COVID-19 susceptibility	G	A	0.7242	0.010468	0.01077	0.3311	1683768	82.596	0.000360632
Breast cancer	ieu-a-1126	rs7149262	14	37136545	A	C	0.2113	-0.0724	0.0076	2.47116e-21	228951	COVID-19 susceptibility	A	C	0.2133	-0.022893	0.012035	0.05714	1683768	90.7507	0.000396222
Breast cancer	ieu-a-1126	rs7223535	17	29211667	A	G	0.268	-0.0439	0.007	3.52899e-10	228951	COVID-19 susceptibility	A	G	0.2723	0.013864	0.010943	0.2052	1683768	39.3308	0.000171759
Breast cancer	ieu-a-1126	rs7258465	19	18533642	C	T	0.3436	-0.0725	0.0066	2.78869e-28	228951	COVID-19 susceptibility	C	T	0.3513	-0.0036811	0.010261	0.7198	1683768	120.667	0.000526769
Breast cancer	ieu-a-1126	rs72658071	8	76305785	T	A	0.0877	0.1182	0.0107	2.57988e-28	228951	COVID-19 susceptibility	T	A	0.08086	0.017172	0.016762	0.3056	1683768	122.03	0.000532718
Breast cancer	ieu-a-1126	rs72725173	14	68509589	A	G	0.1578	0.0559	0.0085	3.87525e-11	228951	COVID-19 susceptibility	A	G	0.1505	-0.013902	0.013015	0.2855	1683768	43.25	0.000188871
Breast cancer	ieu-a-1126	rs72755295	1	242034263	G	A	0.0309	0.1376	0.0179	1.64589e-14	228951	COVID-19 susceptibility	G	A	0.03977	0.0013416	0.027476	0.9611	1683768	59.0923	0.000258036
Breast cancer	ieu-a-1126	rs73949122	2	121157485	G	C	0.1664	-0.0593	0.0084	1.84587e-12	228951	COVID-19 susceptibility	G	C	0.1792	-0.0058767	0.012698	0.6435	1683768	49.8369	0.000217629
Breast cancer	ieu-a-1126	rs7500067	16	80648296	G	A	0.2293	0.0785	0.0073	4.06443e-27	228951	COVID-19 susceptibility	G	A	0.2324	0.0066891	0.011333	0.5551	1683768	115.636	0.000504819
Breast cancer	ieu-a-1126	rs7626742	3	27268398	T	G	0.5327	0.1046	0.0062	1.61213e-63	228951	COVID-19 susceptibility	T	G	0.5392	-0.015177	0.0094752	0.1092	1683768	284.63	0.00124166
Breast cancer	ieu-a-1126	rs7650602	3	141147414	C	T	0.4422	0.0489	0.0063	6.22444e-15	228951	COVID-19 susceptibility	C	T	0.4468	0.0021171	0.010168	0.8351	1683768	60.2472	0.000263077
Breast cancer	ieu-a-1126	rs76956704	6	152031496	T	C	0.03	0.1352	0.0182	1.27087e-13	228951	COVID-19 susceptibility	T	C	0.03784	0.029489	0.02827	0.2969	1683768	55.1837	0.000240972
Breast cancer	ieu-a-1126	rs7697216	4	175828036	C	T	0.8819	0.1039	0.0098	1.6099e-26	228951	COVID-19 susceptibility	C	T	0.8691	-0.028969	0.014396	0.04419	1683768	112.403	0.000490712
Breast cancer	ieu-a-1126	rs77528541	4	126843504	T	G	0.1361	-0.0583	0.0096	1.414e-09	228951	COVID-19 susceptibility	T	G	0.1375	-0.0058273	0.01494	0.6965	1683768	36.8803	0.000161059
Breast cancer	ieu-a-1126	rs78440108	14	93070286	T	C	0.1718	-0.0595	0.0084	1.61808e-12	228951	COVID-19 susceptibility	T	C	0.1687	-0.013991	0.013008	0.2821	1683768	50.1736	0.0002191
Breast cancer	ieu-a-1126	rs78540526	11	69331418	T	C	0.0756	0.2758	0.0113	1.81134e-131	228951	COVID-19 susceptibility	T	C	0.08582	-0.0096622	0.017954	0.5905	1683768	595.706	0.00259516
Breast cancer	ieu-a-1126	rs7904249	10	80887337	A	G	0.1592	0.0764	0.0084	6.98072e-20	228951	COVID-19 susceptibility	A	G	0.163	-0.0026362	0.012924	0.8384	1683768	82.7234	0.000361187
Breast cancer	ieu-a-1126	rs7971	7	21940960	G	A	0.3531	-0.0365	0.0065	1.93099e-08	228951	COVID-19 susceptibility	G	A	0.3478	-0.011457	0.0099381	0.249	1683768	31.5325	0.000137708
Breast cancer	ieu-a-1126	rs9361840	6	82254932	G	A	0.2368	0.0541	0.0072	7.13839e-14	228951	COVID-19 susceptibility	G	A	0.2425	-0.0010169	0.011164	0.9274	1683768	56.4585	0.000246538
Breast cancer	ieu-a-1126	rs941764	14	91841069	G	A	0.3429	0.0463	0.0065	8.20729e-13	228951	COVID-19 susceptibility	G	A	0.3354	-0.0081743	0.0099389	0.4108	1683768	50.7382	0.000221565
Breast cancer	ieu-a-1126	rs9693444	8	29509616	C	A	0.6757	-0.0626	0.0066	1.59993e-21	228951	COVID-19 susceptibility	C	A	0.6749	0.0095851	0.010417	0.3575	1683768	89.9624	0.000392782
Breast cancer	ieu-a-1126	rs9833888	3	99723580	T	G	0.2259	0.0457	0.0074	5.15098e-10	228951	COVID-19 susceptibility	T	G	0.2293	0.010702	0.011338	0.3452	1683768	38.139	0.000166555
ER+ breast cancer	ieu-a-1127	rs10423928	19	46182304	A	T	0.2138	0.0557	0.0095	5.09096e-09	175475	COVID-19 susceptibility	A	T	0.2214	-0.015733	0.011645	0.1767	1683768	34.3766	0.00019587
ER+ breast cancer	ieu-a-1127	rs10828249	10	21824727	A	G	0.358	0.0726	0.0077	6.72357e-21	175475	COVID-19 susceptibility	A	G	0.3421	-0.011807	0.0098694	0.2316	1683768	88.898	0.000506362
ER+ breast cancer	ieu-a-1127	rs10896047	11	65572431	A	G	0.4858	-0.0493	0.0074	2.319e-11	175475	COVID-19 susceptibility	A	G	0.4861	-0.0098875	0.010321	0.338	1683768	44.3844	0.000252878
ER+ breast cancer	ieu-a-1127	rs10941679	5	44706498	G	A	0.2511	0.1563	0.0084	8.26799e-78	175475	COVID-19 susceptibility	G	A	0.2596	-0.010533	0.011474	0.3586	1683768	346.226	0.00196921
ER+ breast cancer	ieu-a-1127	rs10995201	10	64299890	G	A	0.1591	-0.1379	0.0105	1.11506e-39	175475	COVID-19 susceptibility	G	A	0.1708	-0.0069409	0.013668	0.6116	1683768	172.484	0.000982003
ER+ breast cancer	ieu-a-1127	rs11117758	1	217220574	A	G	0.2082	-0.05	0.0091	4.06004e-08	175475	COVID-19 susceptibility	A	G	0.207	0.024495	0.012959	0.05873	1683768	30.1896	0.000172017
ER+ breast cancer	ieu-a-1127	rs11133838	5	16254310	G	A	0.5841	-0.0415	0.0075	2.82898e-08	175475	COVID-19 susceptibility	G	A	0.5839	0.0055673	0.0095902	0.5616	1683768	30.6178	0.000174457
ER+ breast cancer	ieu-a-1127	rs11571818	13	32968810	C	T	0.0081	0.239	0.0397	1.69001e-09	175475	COVID-19 susceptibility	C	T	0.008682	-0.043785	0.057656	0.4476	1683768	36.2422	0.000206497
ER+ breast cancer	ieu-a-1127	rs11624164	14	68986157	T	C	0.2552	-0.1037	0.0086	1.38484e-33	175475	COVID-19 susceptibility	T	C	0.2698	0.0038658	0.011075	0.727	1683768	145.399	0.000827924
ER+ breast cancer	ieu-a-1127	rs11822830	11	129461016	G	A	0.5961	0.0445	0.0075	3.33204e-09	175475	COVID-19 susceptibility	G	A	0.6044	0.0038741	0.0097879	0.6922	1683768	35.2044	0.000200586
ER+ breast cancer	ieu-a-1127	rs12550713	8	128370949	G	C	0.3991	0.1093	0.0075	2.9902e-48	175475	COVID-19 susceptibility	G	C	0.3976	0.015375	0.0095761	0.1084	1683768	212.382	0.00120888
ER+ breast cancer	ieu-a-1127	rs12703654	7	139954640	A	C	0.4491	0.0587	0.0077	3.10313e-14	175475	COVID-19 susceptibility	A	C	0.4366	-0.00076406	0.010726	0.9432	1683768	58.1159	0.000331086
ER+ breast cancer	ieu-a-1127	rs12711947	2	121244272	C	T	0.8983	0.0864	0.0124	3.41271e-12	175475	COVID-19 susceptibility	C	T	0.899	-0.017764	0.016963	0.295	1683768	48.5494	0.000276601
ER+ breast cancer	ieu-a-1127	rs12769650	10	115153192	A	G	0.1276	0.0746	0.011	1.10002e-11	175475	COVID-19 susceptibility	A	G	0.1352	-0.0088246	0.013966	0.5275	1683768	45.9931	0.00026204
ER+ breast cancer	ieu-a-1127	rs13267382	8	117209548	G	A	0.6478	-0.0427	0.0077	2.93299e-08	175475	COVID-19 susceptibility	G	A	0.6256	0.0071532	0.010481	0.4949	1683768	30.7521	0.000175222
ER+ breast cancer	ieu-a-1127	rs1361549	6	82287685	A	G	0.4191	-0.0451	0.0075	1.55901e-09	175475	COVID-19 susceptibility	A	G	0.4274	0.010743	0.0095995	0.2631	1683768	36.1602	0.00020603
ER+ breast cancer	ieu-a-1127	rs143048713	3	46893173	GGT	G	0.104	-0.0999	0.0126	2.44512e-15	175475	COVID-19 susceptibility	GGT	G	0.1007	-0.018115	0.017242	0.2934	1683768	62.8622	0.000358116
ER+ breast cancer	ieu-a-1127	rs1432679	5	158244083	T	C	0.5669	-0.0695	0.0074	5.77431e-21	175475	COVID-19 susceptibility	T	C	0.5781	-0.017945	0.009807	0.06727	1683768	88.2076	0.000502432
ER+ breast cancer	ieu-a-1127	rs151309152	10	123234980	A	C	0.0275	0.1492	0.0224	2.98401e-11	175475	COVID-19 susceptibility	A	C	0.0389	0.020518	0.030189	0.4967	1683768	44.3651	0.000252768
ER+ breast cancer	ieu-a-1127	rs1685191	19	44283232	T	C	0.5677	-0.0635	0.0077	1.523e-16	175475	COVID-19 susceptibility	T	C	0.559	-0.017175	0.010188	0.09185	1683768	68.0089	0.000387425
ER+ breast cancer	ieu-a-1127	rs16857609	2	218296508	T	C	0.2621	0.0721	0.0083	3.43005e-18	175475	COVID-19 susceptibility	T	C	0.2715	-0.010154	0.011039	0.3576	1683768	75.4596	0.00042985
ER+ breast cancer	ieu-a-1127	rs16867692	8	102430331	G	A	0.197	0.0576	0.0096	2.09899e-09	175475	COVID-19 susceptibility	G	A	0.206	-0.00049372	0.012263	0.9679	1683768	36	0.000205118
ER+ breast cancer	ieu-a-1127	rs17035305	1	10616505	A	C	0.3146	-0.0436	0.0079	4.14601e-08	175475	COVID-19 susceptibility	A	C	0.3255	0.0114	0.010915	0.2963	1683768	30.4592	0.000173553
ER+ breast cancer	ieu-a-1127	rs17268829	7	94113799	C	T	0.2796	0.0517	0.0082	2.40099e-10	175475	COVID-19 susceptibility	C	T	0.2805	0.0061978	0.010548	0.5568	1683768	39.7515	0.000226488
ER+ breast cancer	ieu-a-1127	rs17426269	1	88156923	A	G	0.1488	0.0576	0.0103	1.88499e-08	175475	COVID-19 susceptibility	A	G	0.1432	0.022363	0.014108	0.1129	1683768	31.2731	0.00017819
ER+ breast cancer	ieu-a-1127	rs17617028	4	106064683	A	G	0.2265	0.0569	0.0087	7.64364e-11	175475	COVID-19 susceptibility	A	G	0.2293	-0.027823	0.011665	0.01707	1683768	42.7746	0.000243708
ER+ breast cancer	ieu-a-1127	rs17838698	3	30684907	T	C	0.2978	0.0624	0.008	5.78362e-15	175475	COVID-19 susceptibility	T	C	0.3112	-0.011357	0.01036	0.273	1683768	60.84	0.0003466
ER+ breast cancer	ieu-a-1127	rs1812715	17	53174966	G	A	0.6943	0.0908	0.0081	2.66379e-29	175475	COVID-19 susceptibility	G	A	0.694	-0.0077399	0.010606	0.4655	1683768	125.661	0.000715617
ER+ breast cancer	ieu-a-1127	rs2016394	2	172972971	A	G	0.4753	-0.0603	0.0074	3.21884e-16	175475	COVID-19 susceptibility	A	G	0.4809	0.0098584	0.010206	0.3341	1683768	66.4005	0.000378265
ER+ breast cancer	ieu-a-1127	rs2253012	14	37228504	T	C	0.432	0.0511	0.0078	5.19159e-11	175475	COVID-19 susceptibility	T	C	0.4378	0.013507	0.010096	0.1809	1683768	42.9193	0.000244532
ER+ breast cancer	ieu-a-1127	rs2461201	10	123799214	T	C	0.3483	0.0473	0.0078	1.67201e-09	175475	COVID-19 susceptibility	T	C	0.3435	-0.013522	0.010244	0.1868	1683768	36.7733	0.000209523
ER+ breast cancer	ieu-a-1127	rs28649231	14	68423215	A	G	0.1907	0.0651	0.0095	8.80035e-12	175475	COVID-19 susceptibility	A	G	0.1935	0.0014896	0.014001	0.9153	1683768	46.9586	0.00026754
ER+ breast cancer	ieu-a-1127	rs2957449	8	106357736	C	T	0.5331	0.0475	0.0076	5.23697e-10	175475	COVID-19 susceptibility	C	T	0.5574	0.0096102	0.0097797	0.3258	1683768	39.0625	0.000222563
ER+ breast cancer	ieu-a-1127	rs2992756	1	18807339	C	T	0.5202	-0.0608	0.0076	9.92659e-16	175475	COVID-19 susceptibility	C	T	0.5111	-0.01066	0.0094306	0.2583	1683768	64	0.000364595
ER+ breast cancer	ieu-a-1127	rs310302	8	23647494	A	G	0.4023	0.0444	0.0075	3.63103e-09	175475	COVID-19 susceptibility	A	G	0.4109	-0.00056769	0.0098729	0.9541	1683768	35.0464	0.000199685
ER+ breast cancer	ieu-a-1127	rs3217992	9	22003223	T	C	0.3749	-0.0576	0.0076	4.59621e-14	175475	COVID-19 susceptibility	T	C	0.3729	-0.001072	0.0097064	0.9121	1683768	57.4404	0.000327239
ER+ breast cancer	ieu-a-1127	rs34196306	6	27425644	C	G	0.0833	-0.0889	0.015	2.99399e-09	175475	COVID-19 susceptibility	C	G	0.085	-0.017036	0.01851	0.3574	1683768	35.1254	0.000200135
ER+ breast cancer	ieu-a-1127	rs35273427	1	120436751	C	T	0.0599	0.0937	0.016	4.87001e-09	175475	COVID-19 susceptibility	C	T	0.06322	0.012389	0.021254	0.56	1683768	34.2957	0.000195409
ER+ breast cancer	ieu-a-1127	rs35383942	1	201437832	T	C	0.0561	0.0918	0.0164	2.33297e-08	175475	COVID-19 susceptibility	T	C	0.07402	0.0043191	0.02043	0.8326	1683768	31.3327	0.000178529
ER+ breast cancer	ieu-a-1127	rs3769821	2	202123430	T	C	0.6678	-0.0545	0.0078	2.09411e-12	175475	COVID-19 susceptibility	T	C	0.6597	-0.017976	0.0099728	0.07146	1683768	48.8207	0.000278146
ER+ breast cancer	ieu-a-1127	rs3821902	3	63941697	G	T	0.1357	0.0589	0.0106	3.179e-08	175475	COVID-19 susceptibility	G	T	0.1268	-0.013826	0.01386	0.3185	1683768	30.8758	0.000175927
ER+ breast cancer	ieu-a-1127	rs4286946	8	36849946	G	C	0.1742	-0.0748	0.0099	4.90569e-14	175475	COVID-19 susceptibility	G	C	0.1738	0.015328	0.012587	0.2233	1683768	57.0864	0.000325223
ER+ breast cancer	ieu-a-1127	rs4442975	2	217920769	T	G	0.5018	-0.1482	0.0073	6.64967e-91	175475	COVID-19 susceptibility	T	G	0.5039	0.010794	0.0099671	0.2788	1683768	412.146	0.00234327
ER+ breast cancer	ieu-a-1127	rs4703870	5	81492643	A	G	0.7537	0.0613	0.0088	3.31818e-12	175475	COVID-19 susceptibility	A	G	0.7564	-0.019088	0.011224	0.089	1683768	48.5239	0.000276455
ER+ breast cancer	ieu-a-1127	rs4784227	16	52599188	T	C	0.2385	0.2296	0.0084	3.92645e-164	175475	COVID-19 susceptibility	T	C	0.2439	-0.0044294	0.011017	0.6877	1683768	747.111	0.00423965
ER+ breast cancer	ieu-a-1127	rs4820318	22	38570313	A	G	0.3749	-0.0632	0.0076	1.10306e-16	175475	COVID-19 susceptibility	A	G	0.3754	-0.013137	0.0097231	0.1766	1683768	69.1524	0.000393936
ER+ breast cancer	ieu-a-1127	rs4894562	3	172283173	A	G	0.2171	0.0519	0.0089	4.57004e-09	175475	COVID-19 susceptibility	A	G	0.2404	0.0046614	0.0121	0.7001	1683768	34.0059	0.000193758
ER+ breast cancer	ieu-a-1127	rs490706	3	27330615	A	G	0.5247	0.1148	0.0074	3.27869e-54	175475	COVID-19 susceptibility	A	G	0.5306	-0.013779	0.0094522	0.1449	1683768	240.669	0.00136967
ER+ breast cancer	ieu-a-1127	rs4971059	1	155148781	A	G	0.3636	0.0519	0.0077	1.26503e-11	175475	COVID-19 susceptibility	A	G	0.3836	-0.042084	0.010458	5.717e-05	1683768	45.4311	0.000258839
ER+ breast cancer	ieu-a-1127	rs4980029	10	80886726	G	A	0.163	0.0759	0.0098	1.24108e-14	175475	COVID-19 susceptibility	G	A	0.1722	0.0011485	0.013109	0.9302	1683768	59.9834	0.000341722
ER+ breast cancer	ieu-a-1127	rs527616	18	24337424	G	C	0.6202	0.0515	0.0076	1.37404e-11	175475	COVID-19 susceptibility	G	C	0.6	0.014226	0.010435	0.1728	1683768	45.9185	0.000261615
ER+ breast cancer	ieu-a-1127	rs56083805	5	132442263	C	T	0.2422	-0.0595	0.0091	7.00487e-11	175475	COVID-19 susceptibility	C	T	0.2609	2.7535e-05	0.011088	0.998	1683768	42.7515	0.000243576
ER+ breast cancer	ieu-a-1127	rs56891541	5	56240748	TCC	T	0.2472	0.0578	0.0086	1.49417e-11	175475	COVID-19 susceptibility	TCC	T	0.251	-0.0053562	0.012861	0.6771	1683768	45.1709	0.000257357
ER+ breast cancer	ieu-a-1127	rs5997389	22	29134719	A	G	0.0901	0.0882	0.0128	6.23161e-12	175475	COVID-19 susceptibility	A	G	0.1135	-0.0085336	0.016261	0.5997	1683768	47.4807	0.000270514
ER+ breast cancer	ieu-a-1127	rs6062356	20	62879331	G	T	0.1493	0.0564	0.0103	4.12895e-08	175475	COVID-19 susceptibility	G	T	0.1527	-0.0021307	0.01332	0.8729	1683768	29.9836	0.000170844
ER+ breast cancer	ieu-a-1127	rs62048402	16	53803223	A	G	0.4164	-0.0593	0.0075	2.15675e-15	175475	COVID-19 susceptibility	A	G	0.4172	0.01419	0.0095778	0.1384	1683768	62.5154	0.000356141
ER+ breast cancer	ieu-a-1127	rs62247166	3	71532738	T	C	0.475	-0.0406	0.0074	3.91598e-08	175475	COVID-19 susceptibility	T	C	0.4735	-0.00804	0.0098233	0.4131	1683768	30.1015	0.000171516
ER+ breast cancer	ieu-a-1127	rs62355902	5	56053723	T	A	0.1587	0.2032	0.0098	2.88005e-96	175475	COVID-19 susceptibility	T	A	0.1694	0.00030532	0.012747	0.9809	1683768	429.928	0.00244412
ER+ breast cancer	ieu-a-1127	rs6472903	8	76230301	T	G	0.8265	0.0784	0.0099	2.01002e-15	175475	COVID-19 susceptibility	T	G	0.8147	0.00407	0.012452	0.7438	1683768	62.7136	0.00035727
ER+ breast cancer	ieu-a-1127	rs6762558	3	4742251	G	A	0.3868	0.0618	0.0076	3.1798e-16	175475	COVID-19 susceptibility	G	A	0.4053	-0.018069	0.0097348	0.06344	1683768	66.1226	0.000376683
ER+ breast cancer	ieu-a-1127	rs6815814	4	38816338	C	A	0.2543	0.055	0.0086	1.59302e-10	175475	COVID-19 susceptibility	C	A	0.2302	0.0097802	0.011512	0.3956	1683768	40.9005	0.000233033
ER+ breast cancer	ieu-a-1127	rs6904031	6	152055978	T	A	0.0647	0.1107	0.0148	6.66807e-14	175475	COVID-19 susceptibility	T	A	0.082	0.0069322	0.019167	0.7176	1683768	55.9464	0.00031873
ER+ breast cancer	ieu-a-1127	rs7017073	8	129204262	C	T	0.2114	0.0628	0.0089	1.77215e-12	175475	COVID-19 susceptibility	C	T	0.2131	-0.011122	0.01135	0.3271	1683768	49.7897	0.000283665
ER+ breast cancer	ieu-a-1127	rs7149262	14	37136545	A	C	0.2113	-0.0804	0.0091	1.45412e-18	175475	COVID-19 susceptibility	A	C	0.2133	-0.022893	0.012035	0.05714	1683768	78.0601	0.000444658
ER+ breast cancer	ieu-a-1127	rs7153397	14	91742924	T	C	0.6952	0.0536	0.0081	3.3597e-11	175475	COVID-19 susceptibility	T	C	0.6941	0.0032903	0.010901	0.7628	1683768	43.7884	0.000249483
ER+ breast cancer	ieu-a-1127	rs7223535	17	29211667	A	G	0.268	-0.0463	0.0084	3.19602e-08	175475	COVID-19 susceptibility	A	G	0.2723	0.013864	0.010943	0.2052	1683768	30.3811	0.000173108
ER+ breast cancer	ieu-a-1127	rs72658071	8	76305785	T	A	0.0873	0.1187	0.0128	1.37214e-20	175475	COVID-19 susceptibility	T	A	0.08086	0.017172	0.016762	0.3056	1683768	85.9966	0.000489845
ER+ breast cancer	ieu-a-1127	rs72755295	1	242034263	G	A	0.0311	0.1481	0.0208	1.08293e-12	175475	COVID-19 susceptibility	G	A	0.03977	0.0013416	0.027476	0.9611	1683768	50.6971	0.000288834
ER+ breast cancer	ieu-a-1127	rs7280197	21	16415732	C	T	0.3778	0.0461	0.0082	1.69899e-08	175475	COVID-19 susceptibility	C	T	0.3732	-0.023168	0.01001	0.02064	1683768	31.6063	0.000180088
ER+ breast cancer	ieu-a-1127	rs73169065	22	41009707	T	A	0.1073	0.1108	0.0117	2.03704e-21	175475	COVID-19 susceptibility	T	A	0.1138	0.021156	0.016981	0.2128	1683768	89.6825	0.000510829
ER+ breast cancer	ieu-a-1127	rs7463114	8	29507094	C	T	0.6757	-0.0684	0.0078	2.43501e-18	175475	COVID-19 susceptibility	C	T	0.6744	0.0073618	0.010431	0.4803	1683768	76.8994	0.000438049
ER+ breast cancer	ieu-a-1127	rs7500067	16	80648296	G	A	0.2301	0.0819	0.0086	2.25892e-21	175475	COVID-19 susceptibility	G	A	0.2324	0.0066891	0.011333	0.5551	1683768	90.6924	0.000516578
ER+ breast cancer	ieu-a-1127	rs7650602	3	141147414	C	T	0.4421	0.0571	0.0075	2.26882e-14	175475	COVID-19 susceptibility	C	T	0.4468	0.0021171	0.010168	0.8351	1683768	57.9628	0.000330214
ER+ breast cancer	ieu-a-1127	rs7697216	4	175828036	C	T	0.882	0.1338	0.0118	6.06317e-30	175475	COVID-19 susceptibility	C	T	0.8691	-0.028969	0.014396	0.04419	1683768	128.573	0.000732183
ER+ breast cancer	ieu-a-1127	rs7729559	5	169568846	T	C	0.2217	0.057	0.0088	9.31108e-11	175475	COVID-19 susceptibility	T	C	0.2168	-0.016132	0.011377	0.1562	1683768	41.9551	0.00023904
ER+ breast cancer	ieu-a-1127	rs78029804	15	91538920	T	C	0.134	-0.076	0.011	4.56983e-12	175475	COVID-19 susceptibility	T	C	0.1464	-0.0025001	0.014045	0.8587	1683768	47.7355	0.000271965
ER+ breast cancer	ieu-a-1127	rs78540526	11	69331418	T	C	0.0759	0.3277	0.0132	1.02094e-136	175475	COVID-19 susceptibility	T	C	0.08582	-0.0096622	0.017954	0.5905	1683768	616.318	0.00350003
ER+ breast cancer	ieu-a-1127	rs7862747	9	110892899	A	C	0.6224	0.1237	0.0077	3.35738e-58	175475	COVID-19 susceptibility	A	C	0.6311	0.022972	0.010101	0.02295	1683768	258.082	0.00146862
ER+ breast cancer	ieu-a-1127	rs8105994	19	18593553	C	T	0.3454	-0.0768	0.0078	8.65167e-23	175475	COVID-19 susceptibility	C	T	0.3524	0.00070406	0.0099526	0.9436	1683768	96.9467	0.000552183
ER+ breast cancer	ieu-a-1127	rs811458	9	119405271	C	T	0.6879	0.0511	0.008	1.72401e-10	175475	COVID-19 susceptibility	C	T	0.707	-0.0019777	0.01025	0.847	1683768	40.8002	0.000232461
ER+ breast cancer	ieu-a-1127	rs9421410	10	123095209	A	G	0.3274	-0.0599	0.008	6.03115e-14	175475	COVID-19 susceptibility	A	G	0.3437	0.0056048	0.011873	0.6369	1683768	56.0627	0.000319392
ER- breast cancer	ieu-a-1128	rs10069690	5	1279790	T	C	0.2601	0.1613	0.013	1.53993e-35	127442	COVID-19 susceptibility	T	C	0.2693	-0.0092014	0.010713	0.3904	1683768	153.951	0.00120657
ER- breast cancer	ieu-a-1128	rs10096351	8	128372172	G	A	0.5455	0.07	0.0114	7.14398e-10	127442	COVID-19 susceptibility	G	A	0.5476	0.012596	0.0094926	0.1845	1683768	37.7039	0.000295769
ER- breast cancer	ieu-a-1128	rs10179592	2	121246568	C	T	0.8991	0.1156	0.0193	2.29599e-09	127442	COVID-19 susceptibility	C	T	0.8994	-0.019511	0.017127	0.2546	1683768	35.8758	0.000281432
ER- breast cancer	ieu-a-1128	rs10885405	10	114777670	T	C	0.4613	0.0716	0.0113	2.003e-10	127442	COVID-19 susceptibility	T	C	0.4608	-0.018025	0.0094524	0.05654	1683768	40.1485	0.000314939
ER- breast cancer	ieu-a-1128	rs10995201	10	64299890	G	A	0.1582	-0.0963	0.0159	1.56899e-09	127442	COVID-19 susceptibility	G	A	0.1708	-0.0069409	0.013668	0.6116	1683768	36.6824	0.000287758
ER- breast cancer	ieu-a-1128	rs11571833	13	32972626	T	A	0.0081	0.4346	0.0588	1.49108e-13	127442	COVID-19 susceptibility	T	A	0.00863	-0.046616	0.057602	0.4184	1683768	54.6292	0.000428482
ER- breast cancer	ieu-a-1128	rs12129456	1	202189087	G	T	0.4095	-0.0835	0.0118	1.41091e-12	127442	COVID-19 susceptibility	G	T	0.4169	-0.0029745	0.0099292	0.7645	1683768	50.0736	0.000392765
ER- breast cancer	ieu-a-1128	rs12990503	2	218294217	G	C	0.7368	-0.0734	0.0126	6.47993e-09	127442	COVID-19 susceptibility	G	C	0.7261	0.0039465	0.010712	0.7126	1683768	33.9352	0.000266213
ER- breast cancer	ieu-a-1128	rs1432679	5	158244083	T	C	0.5656	-0.073	0.0113	1.05499e-10	127442	COVID-19 susceptibility	T	C	0.5781	-0.017945	0.009807	0.06727	1683768	41.7339	0.000327372
ER- breast cancer	ieu-a-1128	rs17828955	14	69016645	C	T	0.2649	-0.0797	0.013	7.76104e-10	127442	COVID-19 susceptibility	C	T	0.2783	0.0064045	0.010895	0.5566	1683768	37.5863	0.000294847
ER- breast cancer	ieu-a-1128	rs191981806	17	39449318	C	T	0.0275	0.1963	0.036	4.93606e-08	127442	COVID-19 susceptibility	C	T	0.0253	-0.037854	0.037747	0.3159	1683768	29.7328	0.000233254
ER- breast cancer	ieu-a-1128	rs2169137	1	204497913	C	G	0.7396	-0.128	0.0128	1.41808e-23	127442	COVID-19 susceptibility	C	G	0.7506	-0.0065074	0.01083	0.5479	1683768	100	0.000784068
ER- breast cancer	ieu-a-1128	rs2747652	6	152437016	C	T	0.526	0.0991	0.0113	1.92619e-18	127442	COVID-19 susceptibility	C	T	0.5552	-0.013391	0.0097768	0.1708	1683768	76.9113	0.000603146
ER- breast cancer	ieu-a-1128	rs3769823	2	202122995	G	A	0.7071	-0.0684	0.0121	1.76202e-08	127442	COVID-19 susceptibility	G	A	0.6958	-0.019723	0.010329	0.0562	1683768	31.9552	0.000250684
ER- breast cancer	ieu-a-1128	rs4143044	13	73956279	G	T	0.7661	0.0833	0.0135	6.89096e-10	127442	COVID-19 susceptibility	G	T	0.7744	-0.0009848	0.011717	0.933	1683768	38.0735	0.000298667
ER- breast cancer	ieu-a-1128	rs4528762	2	121079515	C	A	0.2646	-0.1213	0.0147	1.92088e-16	127442	COVID-19 susceptibility	C	A	0.2599	0.0093855	0.011923	0.4312	1683768	68.0906	0.00053401
ER- breast cancer	ieu-a-1128	rs4784227	16	52599188	T	C	0.2403	0.1368	0.0128	1.72385e-26	127442	COVID-19 susceptibility	T	C	0.2439	-0.0044294	0.011017	0.6877	1683768	114.223	0.000895483
ER- breast cancer	ieu-a-1128	rs55872725	16	53809123	T	C	0.4152	-0.0784	0.0115	8.59014e-12	127442	COVID-19 susceptibility	T	C	0.4176	0.014536	0.0095732	0.1289	1683768	46.4768	0.000364563
ER- breast cancer	ieu-a-1128	rs56069439	19	17393925	A	C	0.2971	0.155	0.0121	1.24997e-37	127442	COVID-19 susceptibility	A	C	0.3013	-0.0046967	0.010396	0.6514	1683768	164.094	0.00128596
ER- breast cancer	ieu-a-1128	rs56309329	6	82295951	T	A	0.2368	0.0734	0.0131	2.09701e-08	127442	COVID-19 susceptibility	T	A	0.2426	-0.0029629	0.011161	0.7907	1683768	31.3942	0.000246284
ER- breast cancer	ieu-a-1128	rs56687477	8	36832310	A	G	0.1577	-0.1114	0.016	3.18713e-12	127442	COVID-19 susceptibility	A	G	0.1559	0.01301	0.013194	0.3241	1683768	48.4764	0.000380241
ER- breast cancer	ieu-a-1128	rs616402	1	10566272	T	C	0.307	-0.1172	0.0124	2.64972e-21	127442	COVID-19 susceptibility	T	C	0.3175	0.013694	0.010181	0.1786	1683768	89.333	0.00070049
ER- breast cancer	ieu-a-1128	rs6569648	6	130349119	T	C	0.7651	0.0741	0.0135	4.25804e-08	127442	COVID-19 susceptibility	T	C	0.76	0.017377	0.011079	0.1168	1683768	30.1279	0.000236353
ER- breast cancer	ieu-a-1128	rs6725517	2	25129473	G	A	0.4065	-0.0683	0.0122	1.98299e-08	127442	COVID-19 susceptibility	G	A	0.4066	-0.00018915	0.0095719	0.9842	1683768	31.3416	0.000245872
ER- breast cancer	ieu-a-1128	rs76956704	6	152031496	T	C	0.03	0.2193	0.0325	1.49486e-11	127442	COVID-19 susceptibility	T	C	0.03784	0.029489	0.02827	0.2969	1683768	45.5314	0.000357149
ER- breast cancer	ieu-a-1128	rs7710996	5	44514350	G	A	0.7729	-0.0773	0.0132	5.18501e-09	127442	COVID-19 susceptibility	G	A	0.7643	0.0057924	0.011916	0.6269	1683768	34.2934	0.000269022
ER- breast cancer	ieu-a-1128	rs9397437	6	151952332	A	G	0.0682	0.2733	0.0206	2.75931e-40	127442	COVID-19 susceptibility	A	G	0.06644	-0.0037784	0.018704	0.8399	1683768	176.013	0.00137924
Endometrial cancer	ebi-a-GCST006464	rs10089519	8	129532118	G	A	0.666762	0.0902401	0.0162873	3.01578e-08	121885	COVID-19 susceptibility	G	A	0.6641	-0.0023211	0.010371	0.8229	1683768	30.6974	0.000251796
Endometrial cancer	ebi-a-GCST006464	rs10835920	11	32489664	T	C	0.364733	0.0892075	0.015698	1.32562e-08	121885	COVID-19 susceptibility	T	C	0.3607	-0.0034002	0.010015	0.7342	1683768	32.2934	0.000264884
Endometrial cancer	ebi-a-GCST006464	rs113998067	1	38073356	C	T	0.0481754	0.204335	0.0370808	3.57726e-08	121885	COVID-19 susceptibility	C	T	0.04577	0.0089473	0.023593	0.7045	1683768	30.366	0.000249078
Endometrial cancer	ebi-a-GCST006464	rs11651052	17	36102381	G	A	0.547556	0.141454	0.0153955	4.00037e-20	121885	COVID-19 susceptibility	G	A	0.5602	-0.0020146	0.0099869	0.8401	1683768	84.4195	0.000692148
Endometrial cancer	ebi-a-GCST006464	rs148261157	2	60897579	A	G	0.0404386	0.229226	0.0415263	3.38992e-08	121885	COVID-19 susceptibility	A	G	0.04471	0.038232	0.024654	0.121	1683768	30.4706	0.000249936
Endometrial cancer	ebi-a-GCST006464	rs1740828	6	21649085	A	G	0.485476	-0.137017	0.0168448	4.15145e-16	121885	COVID-19 susceptibility	A	G	0.4858	0.0092505	0.010111	0.3603	1683768	66.1633	0.000542548
Endometrial cancer	ebi-a-GCST006464	rs17601876	15	51553909	G	A	0.484921	0.115832	0.0152668	3.26889e-14	121885	COVID-19 susceptibility	G	A	0.4902	-0.0094734	0.0096744	0.3275	1683768	57.5653	0.000472077
Endometrial cancer	ebi-a-GCST006464	rs4733613	8	129599278	G	C	0.862502	-0.154791	0.0221996	3.10957e-12	121885	COVID-19 susceptibility	G	C	0.8655	0.005656	0.014798	0.7023	1683768	48.6185	0.000398735
Endometrial cancer	ebi-a-GCST006464	rs7981863	13	73812141	T	C	0.265982	-0.146429	0.0173105	2.69836e-17	121885	COVID-19 susceptibility	T	C	0.2538	0.00027297	0.011038	0.9803	1683768	71.5542	0.000586728
Endometrial cancer	ebi-a-GCST006464	rs882380	17	46294236	A	C	0.608645	0.0919141	0.0156883	4.66283e-09	121885	COVID-19 susceptibility	A	C	0.6011	0.0049701	0.0096175	0.6053	1683768	34.3252	0.000281545
Endometrial cancer	ebi-a-GCST006464	rs937213	15	40322124	C	T	0.426577	0.089169	0.0152556	5.06512e-09	121885	COVID-19 susceptibility	C	T	0.43	0.0061105	0.010244	0.5508	1683768	34.164	0.000280223
Endometrial cancer	ebi-a-GCST006464	rs9668337	12	26426338	A	G	0.743413	0.107599	0.0176545	1.09628e-09	121885	COVID-19 susceptibility	A	G	0.7297	0.0004487	0.010677	0.9665	1683768	37.1455	0.00030467
Prostate cancer	ieu-b-85	rs1004030	14	23305649	C	T	0.4156	-0.0462	0.0082	1.54899e-08	140254	COVID-19 susceptibility	C	T	0.4186	0.0023537	0.011052	0.8314	1683768	31.7436	0.000226281
Prostate cancer	ieu-b-85	rs10122495	9	34049779	A	T	0.704	-0.0501	0.0088	1.33601e-08	140254	COVID-19 susceptibility	A	T	0.6813	0.012502	0.012002	0.2975	1683768	32.4123	0.000231047
Prostate cancer	ieu-b-85	rs10127983	1	153923276	T	C	0.3117	0.0631	0.0085	1.01601e-13	140254	COVID-19 susceptibility	T	C	0.3099	-0.013371	0.010234	0.1914	1683768	55.1088	0.000392773
Prostate cancer	ieu-b-85	rs10460109	18	73036165	C	T	0.5857	-0.0441	0.008	3.48297e-08	140254	COVID-19 susceptibility	C	T	0.5701	-0.00074395	0.009849	0.9398	1683768	30.3877	0.000216618
Prostate cancer	ieu-b-85	rs1048019	6	160147630	G	A	0.2849	-0.0569	0.0091	3.21899e-10	140254	COVID-19 susceptibility	G	A	0.2865	0.0012393	0.010556	0.9065	1683768	39.0968	0.000278684
Prostate cancer	ieu-b-85	rs1048169	9	19055965	C	T	0.379	0.0609	0.0081	6.52529e-14	140254	COVID-19 susceptibility	C	T	0.3907	0.0060925	0.0096634	0.5284	1683768	56.5281	0.000402884
Prostate cancer	ieu-b-85	rs10486567	7	27976563	A	G	0.2373	-0.1335	0.0094	2.03704e-45	140254	COVID-19 susceptibility	A	G	0.24	-0.0070724	0.011145	0.5257	1683768	201.7	0.00143606
Prostate cancer	ieu-b-85	rs10793821	5	133836209	T	C	0.5795	0.0527	0.008	5.4275e-11	140254	COVID-19 susceptibility	T	C	0.5773	0.0073026	0.010341	0.4801	1683768	43.3952	0.000309313
Prostate cancer	ieu-b-85	rs10845938	12	14416918	G	A	0.5541	0.0572	0.008	9.80393e-13	140254	COVID-19 susceptibility	G	A	0.5798	0.0065847	0.0098543	0.504	1683768	51.1225	0.000364372
Prostate cancer	ieu-b-85	rs10870546	12	133054609	G	A	0.7122	-0.0531	0.0089	2.86999e-09	140254	COVID-19 susceptibility	G	A	0.7007	0.020292	0.010899	0.06264	1683768	35.5966	0.00025374
Prostate cancer	ieu-b-85	rs10947980	6	41525739	G	A	0.2634	0.0834	0.0089	8.78011e-21	140254	COVID-19 susceptibility	G	A	0.2717	-0.018056	0.010758	0.09326	1683768	87.8116	0.000625707
Prostate cancer	ieu-b-85	rs11135766	8	23533623	T	C	0.5736	-0.1291	0.008	5.09214e-59	140254	COVID-19 susceptibility	T	C	0.5776	0.01029	0.0098774	0.2975	1683768	260.419	0.00185335
Prostate cancer	ieu-b-85	rs11135910	8	25892142	T	C	0.1529	0.0782	0.011	9.1939e-13	140254	COVID-19 susceptibility	T	C	0.1572	-0.01989	0.013023	0.1267	1683768	50.5392	0.000360216
Prostate cancer	ieu-b-85	rs11214775	11	113807181	A	G	0.2915	-0.071	0.009	3.92826e-15	140254	COVID-19 susceptibility	A	G	0.2921	-0.010759	0.010953	0.326	1683768	62.2346	0.000443537
Prostate cancer	ieu-b-85	rs11263763	17	36103565	A	G	0.5292	0.2033	0.008	3.06196e-141	140254	COVID-19 susceptibility	A	G	0.5578	-0.0053901	0.010276	0.5999	1683768	645.795	0.00458343
Prostate cancer	ieu-b-85	rs113577745	2	10135681	G	C	0.098	0.0784	0.0131	2.08901e-09	140254	COVID-19 susceptibility	G	C	0.0979	0.0029901	0.015909	0.8509	1683768	35.817	0.000255311
Prostate cancer	ieu-b-85	rs11666569	19	17214073	T	C	0.2867	-0.0516	0.009	8.16808e-09	140254	COVID-19 susceptibility	T	C	0.2685	0.018499	0.01049	0.07783	1683768	32.8711	0.000234317
Prostate cancer	ieu-b-85	rs11691517	2	111893096	G	T	0.2589	-0.0635	0.0091	3.51075e-12	140254	COVID-19 susceptibility	G	T	0.2696	0.0047599	0.011162	0.6698	1683768	48.6928	0.00034706
Prostate cancer	ieu-b-85	rs1182	9	132576060	A	C	0.2198	0.0581	0.0095	1.102e-09	140254	COVID-19 susceptibility	A	C	0.2173	0.0034151	0.012192	0.7794	1683768	37.4029	0.000266612
Prostate cancer	ieu-b-85	rs11863709	16	57654576	T	C	0.0403	-0.1481	0.022	1.78197e-11	140254	COVID-19 susceptibility	T	C	0.04104	0.017432	0.026238	0.5064	1683768	45.3174	0.00032301
Prostate cancer	ieu-b-85	rs12004058	9	18564470	G	C	0.312	-0.0481	0.0086	2.35798e-08	140254	COVID-19 susceptibility	G	C	0.2951	0.018454	0.010809	0.08775	1683768	31.2819	0.000222991
Prostate cancer	ieu-b-85	rs12139208	1	88213014	C	T	0.6286	-0.0458	0.0082	2.57899e-08	140254	COVID-19 susceptibility	C	T	0.614	-0.0247	0.0099834	0.01336	1683768	31.1963	0.000222381
Prostate cancer	ieu-b-85	rs12179053	6	160711566	T	C	0.2603	-0.0559	0.0091	6.49696e-10	140254	COVID-19 susceptibility	T	C	0.2608	0.01133	0.011671	0.3316	1683768	37.7347	0.000268977
Prostate cancer	ieu-b-85	rs12510147	4	95521863	A	G	0.3115	-0.0888	0.0086	4.3401e-25	140254	COVID-19 susceptibility	A	G	0.3108	0.01235	0.010269	0.2291	1683768	106.618	0.000759609
Prostate cancer	ieu-b-85	rs12610267	19	38744733	G	A	0.5103	-0.0966	0.0079	4.86743e-34	140254	COVID-19 susceptibility	G	A	0.5264	-0.00059424	0.0094497	0.9499	1683768	149.52	0.00106495
Prostate cancer	ieu-b-85	rs12665339	6	30601232	G	A	0.1674	0.0615	0.0106	5.55699e-09	140254	COVID-19 susceptibility	G	A	0.1807	-0.025067	0.012968	0.05324	1683768	33.6619	0.000239952
Prostate cancer	ieu-b-85	rs12795301	11	68992285	A	C	0.1586	0.2201	0.0105	3.06973e-98	140254	COVID-19 susceptibility	A	C	0.1513	0.007556	0.012958	0.5598	1683768	439.401	0.00312316
Prostate cancer	ieu-b-85	rs1283104	3	106962521	G	C	0.3788	0.047	0.0082	8.8111e-09	140254	COVID-19 susceptibility	G	C	0.3748	0.016775	0.010007	0.09365	1683768	32.8525	0.000234184
Prostate cancer	ieu-b-85	rs12956892	18	56746315	T	G	0.3021	0.0498	0.0086	7.68405e-09	140254	COVID-19 susceptibility	T	G	0.3138	0.018003	0.010327	0.08128	1683768	33.5322	0.000239028
Prostate cancer	ieu-b-85	rs13174377	5	1543918	G	A	0.04	0.1432	0.021	8.7438e-12	140254	COVID-19 susceptibility	G	A	0.05311	0.022414	0.024379	0.3579	1683768	46.4994	0.000331432
Prostate cancer	ieu-b-85	rs13332673	16	89940386	T	G	0.0129	0.2246	0.0394	1.17601e-08	140254	COVID-19 susceptibility	T	G	0.0114	0.0078733	0.050249	0.8755	1683768	32.4958	0.000231642
Prostate cancer	ieu-b-85	rs145571764	22	40500261	G	GA	0.8173	-0.0721	0.0102	1.55203e-12	140254	COVID-19 susceptibility	G	GA	0.8161	0.015678	0.014101	0.2662	1683768	49.9655	0.000356128
Prostate cancer	ieu-b-85	rs1482680	5	44392142	A	G	0.6667	-0.0501	0.0085	3.58303e-09	140254	COVID-19 susceptibility	A	G	0.6625	0.0024021	0.010678	0.822	1683768	34.7406	0.00024764
Prostate cancer	ieu-b-85	rs16958674	16	57693055	T	C	0.2385	-0.0533	0.0094	1.274e-08	140254	COVID-19 susceptibility	T	C	0.2492	0.0024889	0.011643	0.8307	1683768	32.1513	0.000229187
Prostate cancer	ieu-b-85	rs17369534	3	152064639	C	G	0.1047	-0.0873	0.0134	6.51478e-11	140254	COVID-19 susceptibility	C	G	0.09538	-0.004219	0.016371	0.7966	1683768	42.4443	0.000302537
Prostate cancer	ieu-b-85	rs17599629	1	150658287	G	A	0.2181	0.0654	0.0096	9.87188e-12	140254	COVID-19 susceptibility	G	A	0.2222	0.02848	0.011551	0.01368	1683768	46.4102	0.000330796
Prostate cancer	ieu-b-85	rs17621345	7	40875192	C	A	0.2587	-0.0715	0.0095	6.72048e-14	140254	COVID-19 susceptibility	C	A	0.2684	0.0082078	0.011081	0.4589	1683768	56.6454	0.00040372
Prostate cancer	ieu-b-85	rs17749618	11	76251818	G	A	0.324	-0.0609	0.0085	7.47997e-13	140254	COVID-19 susceptibility	G	A	0.3184	-0.008502	0.010568	0.4211	1683768	51.333	0.000365872
Prostate cancer	ieu-b-85	rs17804499	4	74442349	C	G	0.0534	-0.1542	0.0192	9.15166e-16	140254	COVID-19 susceptibility	C	G	0.05473	0.026081	0.021085	0.2161	1683768	64.501	0.000459682
Prostate cancer	ieu-b-85	rs1881502	11	1507512	C	T	0.8097	-0.0581	0.0101	7.42198e-09	140254	COVID-19 susceptibility	C	T	0.8081	0.015488	0.012024	0.1977	1683768	33.091	0.000235884
Prostate cancer	ieu-b-85	rs1978060	22	19749525	G	A	0.6127	0.0568	0.0083	8.54083e-12	140254	COVID-19 susceptibility	G	A	0.6219	-0.0035905	0.01059	0.7346	1683768	46.8318	0.0003338
Prostate cancer	ieu-b-85	rs2018336	6	11217897	C	T	0.2206	-0.0679	0.0096	1.9059e-12	140254	COVID-19 susceptibility	C	T	0.2098	0.017119	0.01149	0.1362	1683768	50.0262	0.00035656
Prostate cancer	ieu-b-85	rs2028900	2	85767735	T	C	0.4418	-0.082	0.008	6.67421e-25	140254	COVID-19 susceptibility	T	C	0.4313	-0.012323	0.0094808	0.1937	1683768	105.062	0.000748537
Prostate cancer	ieu-b-85	rs2191139	19	42001210	C	T	0.7474	0.0875	0.0093	3.25162e-21	140254	COVID-19 susceptibility	C	T	0.7448	0.00090962	0.011607	0.9375	1683768	88.5218	0.000630764
Prostate cancer	ieu-b-85	rs2242652	5	1280028	A	G	0.2054	-0.1598	0.0105	3.46019e-52	140254	COVID-19 susceptibility	A	G	0.2101	-0.0091811	0.012221	0.4525	1683768	231.619	0.00164873
Prostate cancer	ieu-b-85	rs2256814	20	62373983	A	G	0.1904	-0.0958	0.0106	1.40185e-19	140254	COVID-19 susceptibility	A	G	0.2043	-0.0059181	0.012004	0.622	1683768	81.6807	0.000582046
Prostate cancer	ieu-b-85	rs28441558	17	7803118	C	T	0.0548	0.1507	0.0182	1.01601e-16	140254	COVID-19 susceptibility	C	T	0.06102	0.043819	0.020904	0.03606	1683768	68.562	0.00048861
Prostate cancer	ieu-b-85	rs28485589	2	173303031	G	A	0.0608	-0.2441	0.0176	1.10688e-43	140254	COVID-19 susceptibility	G	A	0.06378	-0.024103	0.020627	0.2426	1683768	192.358	0.00136964
Prostate cancer	ieu-b-85	rs2928681	8	23437981	A	C	0.5887	-0.0553	0.008	5.37527e-12	140254	COVID-19 susceptibility	A	C	0.5952	0.0030772	0.0095907	0.7483	1683768	47.7827	0.000340575
Prostate cancer	ieu-b-85	rs3127580	6	160710851	T	C	0.1402	0.1214	0.0111	6.59629e-28	140254	COVID-19 susceptibility	T	C	0.1415	0.0011152	0.014169	0.9373	1683768	119.617	0.000852142
Prostate cancer	ieu-b-85	rs339351	6	117200434	A	C	0.3052	-0.0843	0.0087	2.89601e-22	140254	COVID-19 susceptibility	A	C	0.3175	-0.010691	0.01025	0.2969	1683768	93.8894	0.000668986
Prostate cancer	ieu-b-85	rs33984059	15	56385868	G	A	0.0225	-0.1761	0.0308	1.102e-08	140254	COVID-19 susceptibility	G	A	0.02942	0.036479	0.03168	0.2495	1683768	32.6902	0.000233027
Prostate cancer	ieu-b-85	rs34487581	10	897201	A	G	0.1585	0.0775	0.0109	9.34329e-13	140254	COVID-19 susceptibility	A	G	0.1726	-0.0092295	0.013081	0.4805	1683768	50.5534	0.000360317
Prostate cancer	ieu-b-85	rs35644221	12	90227779	A	G	0.3192	-0.0604	0.0088	8.13954e-12	140254	COVID-19 susceptibility	A	G	0.3336	-0.003018	0.010598	0.7758	1683768	47.1095	0.000335779
Prostate cancer	ieu-b-85	rs4646284	6	160581543	T	TG	0.7075	-0.196	0.0087	2.91743e-112	140254	COVID-19 susceptibility	T	TG	0.7058	0.013012	0.011772	0.269	1683768	507.544	0.00360575
Prostate cancer	ieu-b-85	rs4711748	6	43694598	C	T	0.7746	-0.0521	0.0094	3.36101e-08	140254	COVID-19 susceptibility	C	T	0.7672	-0.012048	0.011595	0.2988	1683768	30.7199	0.000218986
Prostate cancer	ieu-b-85	rs4795643	17	30092614	A	C	0.2287	-0.0618	0.0103	1.639e-09	140254	COVID-19 susceptibility	A	C	0.2214	-0.0012094	0.011771	0.9182	1683768	36	0.000256615
Prostate cancer	ieu-b-85	rs4889467	16	82169385	T	C	0.6506	-0.0463	0.0082	1.91399e-08	140254	COVID-19 susceptibility	T	C	0.6492	-0.014841	0.01048	0.1567	1683768	31.8812	0.000227262
Prostate cancer	ieu-b-85	rs4924487	15	40922915	C	G	0.8359	0.0622	0.0109	1.32099e-08	140254	COVID-19 susceptibility	C	G	0.8437	0.01779	0.013511	0.1879	1683768	32.5633	0.000232123
Prostate cancer	ieu-b-85	rs4962419	10	126697114	A	G	0.2664	0.0598	0.0089	1.61808e-11	140254	COVID-19 susceptibility	A	G	0.2577	-0.0022122	0.010534	0.8337	1683768	45.1463	0.000321791
Prostate cancer	ieu-b-85	rs62003551	14	53424320	G	A	0.1425	-0.1005	0.0117	8.46253e-18	140254	COVID-19 susceptibility	G	A	0.1425	-0.0080471	0.014353	0.575	1683768	73.7837	0.000525803
Prostate cancer	ieu-b-85	rs62186433	2	242257835	G	A	0.1486	0.0863	0.011	3.20627e-15	140254	COVID-19 susceptibility	G	A	0.1591	-0.015001	0.013205	0.256	1683768	61.5512	0.000438669
Prostate cancer	ieu-b-85	rs6465657	7	97816327	T	C	0.5365	-0.1005	0.0079	6.96466e-37	140254	COVID-19 susceptibility	T	C	0.5275	0.021651	0.0094497	0.02195	1683768	161.837	0.00115257
Prostate cancer	ieu-b-85	rs6557265	6	153433402	C	T	0.4226	-0.077	0.008	1.0361e-21	140254	COVID-19 susceptibility	C	T	0.4294	-0.009465	0.0095199	0.3201	1683768	92.6406	0.000660094
Prostate cancer	ieu-b-85	rs6754084	2	202124997	C	T	0.7324	0.05	0.0091	3.52501e-08	140254	COVID-19 susceptibility	C	T	0.7283	-0.019957	0.010705	0.06229	1683768	30.1896	0.000215206
Prostate cancer	ieu-b-85	rs684232	17	618965	C	T	0.3534	0.0832	0.0082	4.3421e-24	140254	COVID-19 susceptibility	C	T	0.359	0.012492	0.01009	0.2157	1683768	102.948	0.000733485
Prostate cancer	ieu-b-85	rs6941125	6	109287209	A	T	0.1457	0.0704	0.0111	1.992e-10	140254	COVID-19 susceptibility	A	T	0.1539	-0.0035569	0.013246	0.7883	1683768	40.2253	0.000286725
Prostate cancer	ieu-b-85	rs6983267	8	128413305	T	G	0.4892	-0.2004	0.0079	2.8119e-141	140254	COVID-19 susceptibility	T	G	0.4772	0.015075	0.0094287	0.1099	1683768	643.489	0.00456714
Prostate cancer	ieu-b-85	rs72725868	8	128091418	G	A	0.0881	-0.1175	0.015	5.46009e-15	140254	COVID-19 susceptibility	G	A	0.1026	-0.01084	0.018122	0.5497	1683768	61.3611	0.000437315
Prostate cancer	ieu-b-85	rs73110464	12	53312612	T	C	0.1277	0.1583	0.0116	1.11301e-42	140254	COVID-19 susceptibility	T	C	0.1341	-0.011105	0.014972	0.4582	1683768	186.228	0.00132605
Prostate cancer	ieu-b-85	rs7313765	12	65011980	A	G	0.4218	-0.0563	0.0082	5.7161e-12	140254	COVID-19 susceptibility	A	G	0.4263	-0.009712	0.0098398	0.3236	1683768	47.1399	0.000335996
Prostate cancer	ieu-b-85	rs73351629	8	128018466	G	C	0.3334	-0.1375	0.0085	5.14754e-59	140254	COVID-19 susceptibility	G	C	0.3168	0.0032513	0.010371	0.7539	1683768	261.678	0.0018623
Prostate cancer	ieu-b-85	rs7522437	1	204029890	A	G	0.4609	-0.0457	0.008	1.21001e-08	140254	COVID-19 susceptibility	A	G	0.4499	-0.030203	0.0098429	0.002151	1683768	32.6327	0.000232617
Prostate cancer	ieu-b-85	rs75358080	3	87398945	G	A	0.0373	-0.1452	0.0216	1.70687e-11	140254	COVID-19 susceptibility	G	A	0.04402	-0.014144	0.026154	0.5886	1683768	45.1883	0.00032209
Prostate cancer	ieu-b-85	rs77541621	8	128077146	A	G	0.0243	0.5907	0.0227	1.03039e-149	140254	COVID-19 susceptibility	A	G	0.03383	-0.019183	0.031766	0.5459	1683768	677.146	0.00480487
Prostate cancer	ieu-b-85	rs77559646	2	242135265	A	G	0.0237	0.2492	0.0267	9.92887e-21	140254	COVID-19 susceptibility	A	G	0.03405	0.039478	0.03056	0.1964	1683768	87.1111	0.000620719
Prostate cancer	ieu-b-85	rs78416326	3	170074517	C	G	0.2062	-0.1763	0.0102	5.59758e-67	140254	COVID-19 susceptibility	C	G	0.2157	0.011544	0.012302	0.3481	1683768	298.748	0.00212555
Prostate cancer	ieu-b-85	rs80326387	15	66705043	A	G	0.2583	0.0567	0.0091	4.64398e-10	140254	COVID-19 susceptibility	A	G	0.2691	0.0031266	0.010975	0.7757	1683768	38.8225	0.000276729
Prostate cancer	ieu-b-85	rs817833	9	110152977	T	G	0.8914	-0.0733	0.0131	2.14299e-08	140254	COVID-19 susceptibility	T	G	0.8896	-0.00022777	0.015738	0.9885	1683768	31.3087	0.000223182
Prostate cancer	ieu-b-85	rs823121	1	205724302	A	G	0.4322	-0.0472	0.008	3.37598e-09	140254	COVID-19 susceptibility	A	G	0.4194	-0.013971	0.0095926	0.1453	1683768	34.81	0.000248135
Prostate cancer	ieu-b-85	rs878987	11	134266372	G	A	0.1459	0.0639	0.0117	4.77298e-08	140254	COVID-19 susceptibility	G	A	0.1646	0.017833	0.012999	0.1701	1683768	29.8284	0.000212632
Prostate cancer	ieu-b-85	rs917811	7	21059022	T	C	0.6856	-0.0686	0.0085	5.50554e-16	140254	COVID-19 susceptibility	T	C	0.6719	0.0035039	0.010486	0.7383	1683768	65.1344	0.000464194
Prostate cancer	ieu-b-85	rs9306894	2	20878105	G	A	0.3633	0.0777	0.0082	1.91911e-21	140254	COVID-19 susceptibility	G	A	0.3625	-0.0016563	0.0098097	0.8659	1683768	89.7872	0.000639775
Prostate cancer	ieu-b-85	rs9443189	6	76495882	G	A	0.1429	-0.0635	0.0116	4.68004e-08	140254	COVID-19 susceptibility	G	A	0.1526	-0.0095136	0.013531	0.482	1683768	29.9662	0.000213614
Prostate cancer	ieu-b-85	rs9625483	22	28888939	A	G	0.0288	0.1338	0.024	2.43299e-08	140254	COVID-19 susceptibility	A	G	0.03789	0.030766	0.030556	0.314	1683768	31.0806	0.000221556
Prostate cancer	ieu-b-85	rs9686557	5	172959030	C	A	0.444	0.0482	0.008	1.94102e-09	140254	COVID-19 susceptibility	C	A	0.4412	-0.008116	0.010036	0.4187	1683768	36.3006	0.000258757
Prostate cancer	ieu-b-85	rs9812088	3	128263668	A	G	0.3	-0.0524	0.0088	2.98999e-09	140254	COVID-19 susceptibility	A	G	0.2924	-0.012569	0.011972	0.2938	1683768	35.4566	0.000252743
Prostate cancer	ieu-b-85	rs9907478	17	47395729	T	C	0.0757	0.1064	0.0147	4.5196e-13	140254	COVID-19 susceptibility	T	C	0.0794	0.0064565	0.018024	0.7202	1683768	52.39	0.000373403
Prostate cancer	ieu-b-85	rs9911515	17	69115358	G	A	0.5197	-0.1618	0.0079	6.46994e-93	140254	COVID-19 susceptibility	G	A	0.5184	0.0065831	0.0097215	0.4983	1683768	419.472	0.00298193
Prostate cancer	ieu-b-85	rs9959454	18	76770820	G	A	0.2672	-0.0872	0.009	5.34441e-22	140254	COVID-19 susceptibility	G	A	0.2666	-0.00972	0.011008	0.3772	1683768	93.8746	0.00066888
Prostate cancer	ieu-b-85	rs9978557	21	42882462	T	C	0.098	-0.1009	0.0143	2.01883e-12	140254	COVID-19 susceptibility	T	C	0.107	0.0055278	0.016526	0.738	1683768	49.7863	0.000354852
Thyroid cancer	ieu-a-1082	rs1001948	10	25466693	C	A	0.6861	2.08667	0.1023	1.36773e-104	1187	COVID-19 susceptibility	C	A	0.3924	-0.0032076	0.010485	0.7597	1683768	416.06	0.259865
Thyroid cancer	ieu-a-1082	rs10049939	4	65252628	G	A	0.8437	3.0297	0.1997	1.39316e-86	1187	COVID-19 susceptibility	G	A	0.7467	0.017369	0.011154	0.1194	1683768	230.167	0.162643
Thyroid cancer	ieu-a-1082	rs10124357	9	79429800	C	T	0.7295	2.05416	0.1069	1.43285e-94	1187	COVID-19 susceptibility	C	T	0.4775	-0.0033129	0.0097312	0.7335	1683768	369.244	0.237571
Thyroid cancer	ieu-a-1082	rs1019024	8	1363967	C	T	0.4387	1.29088	0.09109	2.02395e-47	1187	COVID-19 susceptibility	C	T	0.2617	-0.0053763	0.011046	0.6265	1683768	200.831	0.144917
Thyroid cancer	ieu-a-1082	rs10199888	2	216503552	T	C	0.2828	-1.20397	0.09614	1.41514e-37	1187	COVID-19 susceptibility	T	C	0.1654	-0.0050652	0.012933	0.6953	1683768	156.828	0.116876
Thyroid cancer	ieu-a-1082	rs10208038	2	25032151	G	T	0.5615	0.540426	0.08517	1.92801e-10	1187	COVID-19 susceptibility	G	T	0.4957	0.0038865	0.0094327	0.6803	1683768	40.2624	0.0328602
Thyroid cancer	ieu-a-1082	rs10260654	7	50191216	T	G	0.356	-0.521044	0.08762	2.41602e-09	1187	COVID-19 susceptibility	T	G	0.4535	0.020602	0.010077	0.04089	1683768	35.3624	0.028977
Thyroid cancer	ieu-a-1082	rs1032389	12	99692723	A	C	0.2812	-0.617298	0.09315	2.59896e-11	1187	COVID-19 susceptibility	A	C	0.3784	-0.010569	0.010513	0.3147	1683768	43.9161	0.0357357
Thyroid cancer	ieu-a-1082	rs10474588	5	78772071	C	A	0.5398	0.663588	0.08487	3.95094e-15	1187	COVID-19 susceptibility	C	A	0.4612	0.0050705	0.0097876	0.6044	1683768	61.1348	0.0490596
Thyroid cancer	ieu-a-1082	rs10475268	5	492922	T	G	0.4441	-0.57412	0.08545	1.54917e-11	1187	COVID-19 susceptibility	T	G	0.5649	-0.03909	0.010165	0.0001202	1683768	45.142	0.0366966
Thyroid cancer	ieu-a-1082	rs10493096	1	42325122	A	C	0.1507	-0.683197	0.117	3.395e-09	1187	COVID-19 susceptibility	A	C	0.1755	-0.014719	0.012879	0.2531	1683768	34.0973	0.0279693
Thyroid cancer	ieu-a-1082	rs10494448	1	165831128	C	A	0.3019	-0.552169	0.09228	1.83101e-09	1187	COVID-19 susceptibility	C	A	0.4064	-0.0027482	0.010245	0.7885	1683768	35.8038	0.029328
Thyroid cancer	ieu-a-1082	rs10502692	18	36040352	T	C	0.07807	-3.89026	0.4175	1.81886e-54	1187	COVID-19 susceptibility	T	C	0.2121	-0.0080273	0.011679	0.4919	1683768	86.8249	0.068268
Thyroid cancer	ieu-a-1082	rs10513889	18	54011876	C	A	0.5832	0.468245	0.08528	3.69496e-08	1187	COVID-19 susceptibility	C	A	0.5375	-0.011434	0.0094708	0.2273	1683768	30.1475	0.0248098
Thyroid cancer	ieu-a-1082	rs10744891	12	117722341	T	G	0.3274	-0.557568	0.08994	4.77101e-10	1187	COVID-19 susceptibility	T	G	0.4213	-0.0019725	0.0098281	0.8409	1683768	38.4317	0.0314131
Thyroid cancer	ieu-a-1082	rs10762573	10	75798148	C	A	0.7425	0.768302	0.09634	7.78037e-16	1187	COVID-19 susceptibility	C	A	0.6441	0.0088693	0.0099707	0.3737	1683768	63.5991	0.0509363
Thyroid cancer	ieu-a-1082	rs10777489	12	93653808	G	T	0.5295	-0.475613	0.0856	2.52802e-08	1187	COVID-19 susceptibility	G	T	0.6011	0.0093845	0.0099446	0.3453	1683768	30.8717	0.0253906
Thyroid cancer	ieu-a-1082	rs10786634	10	103164342	G	T	0.5246	0.573233	0.08545	1.66917e-11	1187	COVID-19 susceptibility	G	T	0.377	0.0021113	0.0097039	0.8278	1683768	45.0027	0.0365875
Thyroid cancer	ieu-a-1082	rs10787889	10	120758823	T	G	0.3478	-0.650854	0.08824	1.19895e-13	1187	COVID-19 susceptibility	T	G	0.3918	-0.0054552	0.010335	0.5976	1683768	54.4047	0.0438958
Thyroid cancer	ieu-a-1082	rs10812736	9	28064690	A	C	0.1699	-0.763141	0.1119	4.6505e-12	1187	COVID-19 susceptibility	A	C	0.1882	0.0056711	0.011996	0.6364	1683768	46.5103	0.0377669
Thyroid cancer	ieu-a-1082	rs1082023	7	40006195	T	G	0.323	-1.96184	0.101	1.93019e-93	1187	COVID-19 susceptibility	T	G	0.6427	0.0054366	0.01042	0.6019	1683768	377.298	0.241502
Thyroid cancer	ieu-a-1082	rs10832835	11	2880009	C	A	0.2502	-2.3086	0.1175	1.5417e-104	1187	COVID-19 susceptibility	C	A	0.5193	0.0087417	0.0097858	0.3717	1683768	386.031	0.245718
Thyroid cancer	ieu-a-1082	rs10833197	11	19953492	A	C	0.431	-0.579461	0.08526	9.00326e-12	1187	COVID-19 susceptibility	A	C	0.5362	0.01856	0.0098408	0.05929	1683768	46.191	0.0375174
Thyroid cancer	ieu-a-1082	rs10860779	12	102127262	A	C	0.2764	-0.524756	0.09341	1.66598e-08	1187	COVID-19 susceptibility	A	C	0.3065	-0.015739	0.010293	0.1262	1683768	31.5594	0.0259415
Thyroid cancer	ieu-a-1082	rs10869031	9	74130286	G	T	0.5979	0.553559	0.08603	1.05699e-10	1187	COVID-19 susceptibility	G	T	0.5132	-0.0089938	0.0094408	0.3408	1683768	41.4026	0.0337594
Thyroid cancer	ieu-a-1082	rs10877902	12	63044181	T	G	0.3463	0.658556	0.09125	3.76617e-13	1187	COVID-19 susceptibility	T	G	0.2367	0.0060793	0.011285	0.5901	1683768	52.0858	0.0421037
Thyroid cancer	ieu-a-1082	rs10894838	11	134410837	T	G	0.1618	-2.45877	0.1547	1.42692e-77	1187	COVID-19 susceptibility	T	G	0.2626	-0.0079359	0.011016	0.4713	1683768	252.613	0.175717
Thyroid cancer	ieu-a-1082	rs10916258	1	228219882	A	C	0.1515	-0.735011	0.1172	2.067e-10	1187	COVID-19 susceptibility	A	C	0.2158	0.013151	0.012465	0.2914	1683768	39.3308	0.0321243
Thyroid cancer	ieu-a-1082	rs10928200	2	144578152	T	G	0.2569	-0.761854	0.09678	1.84289e-15	1187	COVID-19 susceptibility	T	G	0.3755	-0.0050402	0.0098441	0.6087	1683768	61.9687	0.0496955
Thyroid cancer	ieu-a-1082	rs10949938	7	64254791	T	G	0.7805	2.06593	0.1197	2.65399e-79	1187	COVID-19 susceptibility	T	G	0.6389	0.0058653	0.010156	0.5636	1683768	297.881	0.20088
Thyroid cancer	ieu-a-1082	rs10952871	7	85593608	T	G	0.351	-0.493805	0.0879	1.74598e-08	1187	COVID-19 susceptibility	T	G	0.4065	0.0022008	0.0098756	0.8236	1683768	31.5597	0.0259418
Thyroid cancer	ieu-a-1082	rs11006981	10	28568378	C	A	0.06557	-2.36542	0.2435	5.00611e-32	1187	COVID-19 susceptibility	C	A	0.1335	0.016854	0.014034	0.2298	1683768	94.3667	0.0737605
Thyroid cancer	ieu-a-1082	rs11041733	11	8103104	T	G	0.4017	-2.09883	0.09586	5.05825e-117	1187	COVID-19 susceptibility	T	G	0.5883	0.0033507	0.010055	0.7389	1683768	479.38	0.288023
Thyroid cancer	ieu-a-1082	rs11098432	4	119203708	C	A	0.4889	0.493476	0.08449	4.68004e-09	1187	COVID-19 susceptibility	C	A	0.4475	-0.02403	0.0097821	0.01403	1683768	34.1131	0.0279819
Thyroid cancer	ieu-a-1082	rs11132917	4	172764187	G	T	0.6498	0.555997	0.0875	1.77101e-10	1187	COVID-19 susceptibility	G	T	0.6614	-0.0056715	0.0099773	0.5697	1683768	40.3765	0.0329503
Thyroid cancer	ieu-a-1082	rs11688848	2	204916206	A	C	0.1695	-0.79518	0.1122	6.32557e-13	1187	COVID-19 susceptibility	A	C	0.1793	-0.00046746	0.012554	0.9703	1683768	50.2279	0.0406629
Thyroid cancer	ieu-a-1082	rs11692610	2	203499512	C	T	0.1364	-2.46899	0.1757	4.02439e-63	1187	COVID-19 susceptibility	C	T	0.2323	-0.015073	0.011481	0.1892	1683768	197.467	0.142837
Thyroid cancer	ieu-a-1082	rs11708894	3	104966715	T	G	0.3553	-1.81708	0.09591	8.22621e-87	1187	COVID-19 susceptibility	T	G	0.5989	-0.0025278	0.010258	0.8054	1683768	358.939	0.232482
Thyroid cancer	ieu-a-1082	rs11721807	4	157094509	T	G	0.2295	-0.715802	0.09962	3.93913e-13	1187	COVID-19 susceptibility	T	G	0.3052	0.012765	0.010688	0.2323	1683768	51.6289	0.0417497
Thyroid cancer	ieu-a-1082	rs11743743	5	6598553	A	C	0.4264	-0.726497	0.08588	1.7398e-17	1187	COVID-19 susceptibility	A	C	0.5132	-0.0050269	0.0094375	0.5943	1683768	71.5622	0.0569508
Thyroid cancer	ieu-a-1082	rs11786147	8	84764257	G	T	0.4327	0.519984	0.0856	1.11301e-09	1187	COVID-19 susceptibility	G	T	0.4116	-0.0015369	0.0096249	0.8731	1683768	36.9005	0.0301993
Thyroid cancer	ieu-a-1082	rs11883054	19	10157219	G	T	0.7254	0.809232	0.09519	8.52707e-18	1187	COVID-19 susceptibility	G	T	0.6775	-0.0030255	0.010434	0.7718	1683768	72.2709	0.0574824
Thyroid cancer	ieu-a-1082	rs1193787	11	63095411	T	C	0.464	-0.665532	0.08469	2.81709e-15	1187	COVID-19 susceptibility	T	C	0.579	0.0046514	0.0095874	0.6276	1683768	61.7552	0.0495327
Thyroid cancer	ieu-a-1082	rs11975969	7	32854040	G	T	0.6931	2.13962	0.1062	2.15278e-103	1187	COVID-19 susceptibility	G	T	0.4495	0.0022618	0.0094868	0.8116	1683768	405.905	0.255141
Thyroid cancer	ieu-a-1082	rs11993947	8	124971455	G	T	0.439	0.574364	0.08591	1.93108e-11	1187	COVID-19 susceptibility	G	T	0.4033	-0.0019946	0.0096626	0.8365	1683768	44.6979	0.0363487
Thyroid cancer	ieu-a-1082	rs12040716	1	107109564	C	A	0.3667	0.528862	0.08897	2.44399e-09	1187	COVID-19 susceptibility	C	A	0.2531	-0.0035414	0.010737	0.7415	1683768	35.3344	0.0289547
Thyroid cancer	ieu-a-1082	rs12118017	1	111306729	C	A	0.2657	0.661656	0.09973	2.22895e-11	1187	COVID-19 susceptibility	C	A	0.2285	-0.010079	0.011357	0.3748	1683768	44.0162	0.0358142
Thyroid cancer	ieu-a-1082	rs12140722	1	213091573	C	A	0.4797	0.635518	0.08543	7.85778e-14	1187	COVID-19 susceptibility	C	A	0.481	0.0093121	0.0095199	0.328	1683768	55.3395	0.0446164
Thyroid cancer	ieu-a-1082	rs12151689	2	166656155	C	A	0.7209	0.661455	0.09328	9.13692e-13	1187	COVID-19 susceptibility	C	A	0.6282	-0.0073767	0.01021	0.47	1683768	50.2833	0.0407059
Thyroid cancer	ieu-a-1082	rs1216502	11	100414877	C	A	0.8162	0.592578	0.1073	2.57199e-08	1187	COVID-19 susceptibility	C	A	0.7539	0.021964	0.012349	0.07531	1683768	30.4994	0.0250921
Thyroid cancer	ieu-a-1082	rs12186611	5	132805024	A	C	0.2716	-0.606236	0.09393	8.41783e-11	1187	COVID-19 susceptibility	A	C	0.3574	0.014783	0.010406	0.1554	1683768	41.6557	0.0339588
Thyroid cancer	ieu-a-1082	rs12196235	6	103827338	C	A	0.5571	2.06436	0.09556	3.04089e-113	1187	COVID-19 susceptibility	C	A	0.2621	0.0044205	0.011451	0.6995	1683768	466.679	0.282548
Thyroid cancer	ieu-a-1082	rs1224751	6	58437809	T	C	0.4337	-0.613597	0.08499	4.13904e-13	1187	COVID-19 susceptibility	T	C	0.4845	-0.013788	0.010138	0.1738	1683768	52.1232	0.0421326
Thyroid cancer	ieu-a-1082	rs12403117	1	79174955	A	C	0.2722	-0.538026	0.09403	8.96004e-09	1187	COVID-19 susceptibility	A	C	0.3023	0.0036705	0.010591	0.7289	1683768	32.7396	0.0268856
Thyroid cancer	ieu-a-1082	rs12433740	14	46933240	T	G	0.2538	-0.669235	0.09594	2.05494e-12	1187	COVID-19 susceptibility	T	G	0.3672	-0.004176	0.010112	0.6796	1683768	48.6584	0.0394424
Thyroid cancer	ieu-a-1082	rs12441088	15	78928264	T	G	0.5583	-1.21462	0.09031	1.10994e-42	1187	COVID-19 susceptibility	T	G	0.7287	-0.012993	0.011562	0.2611	1683768	180.888	0.132432
Thyroid cancer	ieu-a-1082	rs12469609	2	83383702	G	T	0.5805	0.681416	0.08627	2.02488e-15	1187	COVID-19 susceptibility	G	T	0.5561	0.015885	0.0095071	0.09475	1683768	62.3886	0.0500153
Thyroid cancer	ieu-a-1082	rs12510224	4	180702862	G	T	0.1798	-2.16631	0.1379	1.40799e-69	1187	COVID-19 susceptibility	G	T	0.393	-0.014057	0.0096812	0.1465	1683768	246.782	0.17236
Thyroid cancer	ieu-a-1082	rs12524738	6	140194149	A	G	0.05297	-2.72159	0.319	1.08493e-28	1187	COVID-19 susceptibility	A	G	0.1148	7.4129e-05	0.016311	0.9964	1683768	72.7887	0.0578704
Thyroid cancer	ieu-a-1082	rs12595914	16	83628580	T	G	0.4533	-0.563523	0.08528	3.31589e-11	1187	COVID-19 susceptibility	T	G	0.5689	-0.018037	0.0095286	0.05836	1683768	43.6645	0.0355382
Thyroid cancer	ieu-a-1082	rs12782349	10	54929003	A	C	0.3045	-0.555649	0.09054	6.99101e-10	1187	COVID-19 susceptibility	A	C	0.3627	0.011677	0.010197	0.2521	1683768	37.6634	0.0308044
Thyroid cancer	ieu-a-1082	rs12908044	15	37186014	A	C	0.7752	2.13369	0.1224	6.63437e-82	1187	COVID-19 susceptibility	A	C	0.5858	-0.0026522	0.010465	0.7999	1683768	303.878	0.204099
Thyroid cancer	ieu-a-1082	rs13019891	2	113829869	T	G	0.2479	-2.0159	0.1114	7.98914e-85	1187	COVID-19 susceptibility	T	G	0.449	-0.001805	0.0097922	0.8538	1683768	327.467	0.216512
Thyroid cancer	ieu-a-1082	rs13292880	9	35817579	A	C	0.2652	-1.89712	0.1078	2.64119e-78	1187	COVID-19 susceptibility	A	C	0.4227	0.010765	0.0098188	0.2729	1683768	309.708	0.207203
Thyroid cancer	ieu-a-1082	rs13404338	2	79450227	G	A	0.677	2.13453	0.1038	1.14025e-106	1187	COVID-19 susceptibility	G	A	0.5331	-0.015003	0.0097525	0.124	1683768	422.873	0.263001
Thyroid cancer	ieu-a-1082	rs1358852	6	90120991	C	A	0.355	0.531804	0.0902	3.16497e-09	1187	COVID-19 susceptibility	C	A	0.279	-0.0065401	0.01094	0.5499	1683768	34.7608	0.0284981
Thyroid cancer	ieu-a-1082	rs1370301	4	147947622	G	T	0.5569	0.643595	0.08547	3.89314e-14	1187	COVID-19 susceptibility	G	T	0.5228	-0.0047728	0.0096769	0.6219	1683768	56.7019	0.0456647
Thyroid cancer	ieu-a-1082	rs1388492	3	68245477	T	C	0.6763	0.530178	0.08976	3.002e-09	1187	COVID-19 susceptibility	T	C	0.7122	0.0059658	0.01087	0.5831	1683768	34.8881	0.0285995
Thyroid cancer	ieu-a-1082	rs1414154	13	80168006	A	C	0.5004	-0.463105	0.08447	3.81197e-08	1187	COVID-19 susceptibility	A	C	0.5933	0.016586	0.010297	0.1072	1683768	30.0576	0.0247376
Thyroid cancer	ieu-a-1082	rs1459522	3	22675098	T	G	0.3622	-0.523573	0.08729	1.74598e-09	1187	COVID-19 susceptibility	T	G	0.4686	-0.0052927	0.010032	0.5978	1683768	35.977	0.0294658
Thyroid cancer	ieu-a-1082	rs1467345	7	11783917	A	G	0.1736	-0.882856	0.1109	5.20955e-16	1187	COVID-19 susceptibility	A	G	0.1294	-0.0010094	0.01501	0.9464	1683768	63.3748	0.0507658
Thyroid cancer	ieu-a-1082	rs1468696	3	45370416	G	T	0.5009	0.502031	0.08463	2.72201e-09	1187	COVID-19 susceptibility	G	T	0.3879	0.018923	0.010221	0.06412	1683768	35.1894	0.0288393
Thyroid cancer	ieu-a-1082	rs1481897	8	13582367	A	C	0.318	-0.543693	0.09031	1.47601e-09	1187	COVID-19 susceptibility	A	C	0.4188	0.014767	0.0098412	0.1335	1683768	36.244	0.0296779
Thyroid cancer	ieu-a-1082	rs1499214	3	1390985	T	G	0.2695	-0.604038	0.09358	8.33105e-11	1187	COVID-19 susceptibility	T	G	0.3174	-0.012823	0.010575	0.2253	1683768	41.6641	0.0339654
Thyroid cancer	ieu-a-1082	rs1513052	12	17387703	C	A	0.6588	0.599657	0.08862	1.05706e-11	1187	COVID-19 susceptibility	C	A	0.5732	0.00013671	0.0099144	0.989	1683768	45.787	0.0372014
Thyroid cancer	ieu-a-1082	rs1547039	14	94937886	A	C	0.4527	-1.9929	0.0943	7.24436e-108	1187	COVID-19 susceptibility	A	C	0.6625	0.0061593	0.010391	0.5533	1683768	446.63	0.273732
Thyroid cancer	ieu-a-1082	rs156166	3	6425168	C	A	0.5282	0.606052	0.08453	6.06178e-13	1187	COVID-19 susceptibility	C	A	0.3913	0.0049427	0.01056	0.6397	1683768	51.4041	0.0415755
Thyroid cancer	ieu-a-1082	rs1577026	13	59445576	A	C	0.09253	-2.46876	0.2104	2.65705e-46	1187	COVID-19 susceptibility	A	C	0.1708	0.0071038	0.012658	0.5747	1683768	137.679	0.104091
Thyroid cancer	ieu-a-1082	rs1594467	6	7920361	G	A	0.6349	2.62073	0.1073	6.18016e-156	1187	COVID-19 susceptibility	G	A	0.3352	0.01628	0.010747	0.1298	1683768	596.548	0.334848
Thyroid cancer	ieu-a-1082	rs1610315	6	166662128	A	C	0.475	-2.07864	0.0962	1.63305e-113	1187	COVID-19 susceptibility	A	C	0.7535	-0.0067768	0.01126	0.5473	1683768	466.883	0.282637
Thyroid cancer	ieu-a-1082	rs163192	5	68379836	A	C	0.4229	-0.568278	0.08593	3.1989e-11	1187	COVID-19 susceptibility	A	C	0.4713	-0.00768	0.010073	0.4458	1683768	43.7353	0.0355937
Thyroid cancer	ieu-a-1082	rs1667822	3	163930675	T	G	0.4096	-1.97041	0.09571	1.91867e-102	1187	COVID-19 susceptibility	T	G	0.6845	0.0099731	0.010466	0.3407	1683768	423.837	0.263443
Thyroid cancer	ieu-a-1082	rs1683564	19	859214	A	C	0.2865	-0.639227	0.09313	4.87304e-12	1187	COVID-19 susceptibility	A	C	0.3468	-0.010426	0.010994	0.343	1683768	47.1119	0.0382367
Thyroid cancer	ieu-a-1082	rs16838428	4	6200768	T	C	0.0774	-2.95459	0.2916	2.18675e-42	1187	COVID-19 susceptibility	T	C	0.1297	-0.0031141	0.016189	0.8475	1683768	102.664	0.0797291
Thyroid cancer	ieu-a-1082	rs17039540	4	161323274	A	C	0.1881	-0.581248	0.1068	4.15403e-08	1187	COVID-19 susceptibility	A	C	0.3133	0.0022459	0.010328	0.8279	1683768	29.6197	0.024386
Thyroid cancer	ieu-a-1082	rs17137948	7	104115294	A	C	0.5191	0.666895	0.08455	2.24698e-15	1187	COVID-19 susceptibility	A	C	0.4208	0.019928	0.009561	0.03713	1683768	62.2139	0.0498823
Thyroid cancer	ieu-a-1082	rs17256058	14	23592491	T	G	0.1303	-0.692547	0.1255	2.25798e-08	1187	COVID-19 susceptibility	T	G	0.1197	0.036008	0.014663	0.01406	1683768	30.4517	0.0250538
Thyroid cancer	ieu-a-1082	rs17294252	4	138801097	A	C	0.1525	-0.64531	0.1159	1.81401e-08	1187	COVID-19 susceptibility	A	C	0.2346	-0.0082138	0.011254	0.4655	1683768	31.0006	0.0254939
Thyroid cancer	ieu-a-1082	rs1750330	1	119493411	C	A	0.5294	0.464738	0.08413	3.07496e-08	1187	COVID-19 susceptibility	C	A	0.4217	0.013908	0.0094898	0.1428	1683768	30.5151	0.0251047
Thyroid cancer	ieu-a-1082	rs17571067	1	226004162	A	C	0.291	-0.569515	0.09178	4.43598e-10	1187	COVID-19 susceptibility	A	C	0.3981	0.0090177	0.0097602	0.3555	1683768	38.5047	0.0314709
Thyroid cancer	ieu-a-1082	rs17600706	14	99150918	T	G	0.223	-0.570753	0.09982	8.71907e-09	1187	COVID-19 susceptibility	T	G	0.2448	0.0033245	0.011723	0.7767	1683768	32.6935	0.0268487
Thyroid cancer	ieu-a-1082	rs17647119	18	33118693	A	C	0.2214	-0.565634	0.1007	1.56801e-08	1187	COVID-19 susceptibility	A	C	0.2385	-0.0085495	0.011479	0.4564	1683768	31.5509	0.0259347
Thyroid cancer	ieu-a-1082	rs1792746	18	53803363	A	C	0.3795	-0.623435	0.08744	7.83971e-13	1187	COVID-19 susceptibility	A	C	0.439	-0.003589	0.0098434	0.7154	1683768	50.8349	0.0411341
Thyroid cancer	ieu-a-1082	rs1813617	2	19590019	A	C	0.3482	-0.510826	0.0875	4.64098e-09	1187	COVID-19 susceptibility	A	C	0.4048	0.0036897	0.0096461	0.7021	1683768	34.0824	0.0279574
Thyroid cancer	ieu-a-1082	rs1822338	11	24359477	C	A	0.6276	0.520035	0.08711	2.103e-09	1187	COVID-19 susceptibility	C	A	0.6157	0.021146	0.010107	0.03642	1683768	35.6393	0.0291972
Thyroid cancer	ieu-a-1082	rs1827488	15	82391020	G	T	0.6646	0.581785	0.08911	5.44252e-11	1187	COVID-19 susceptibility	G	T	0.5954	-0.0027318	0.0096417	0.7769	1683768	42.6258	0.0347221
Thyroid cancer	ieu-a-1082	rs1846861	2	227359131	C	A	0.5473	0.652773	0.08532	1.51496e-14	1187	COVID-19 susceptibility	C	A	0.4359	0.018185	0.0097921	0.06329	1683768	58.536	0.0470722
Thyroid cancer	ieu-a-1082	rs1868534	11	132094466	G	T	0.5171	0.520708	0.08434	5.92598e-10	1187	COVID-19 susceptibility	G	T	0.4493	0.0074787	0.009724	0.4418	1683768	38.1172	0.031164
Thyroid cancer	ieu-a-1082	rs1880256	2	36162761	C	A	0.7554	0.632805	0.0972	5.45758e-11	1187	COVID-19 susceptibility	C	A	0.6479	0.007075	0.010251	0.4901	1683768	42.3845	0.0345324
Thyroid cancer	ieu-a-1082	rs1885597	14	25043068	G	T	0.5337	0.498403	0.08517	4.41804e-09	1187	COVID-19 susceptibility	G	T	0.4601	0.015485	0.0097397	0.1119	1683768	34.2443	0.0280865
Thyroid cancer	ieu-a-1082	rs1887387	9	90879921	T	C	0.3552	-0.641884	0.08793	2.14882e-13	1187	COVID-19 susceptibility	T	C	0.3169	0.0095252	0.011127	0.392	1683768	53.2892	0.0430345
Thyroid cancer	ieu-a-1082	rs1889562	6	119449385	G	T	0.4127	0.628609	0.08707	3.93731e-13	1187	COVID-19 susceptibility	G	T	0.353	0.0070471	0.010752	0.5122	1683768	52.1224	0.0421319
Thyroid cancer	ieu-a-1082	rs1898422	2	142495019	A	C	0.1705	-0.687762	0.1108	3.50397e-10	1187	COVID-19 susceptibility	A	C	0.1666	0.0031534	0.012853	0.8062	1683768	38.5298	0.0314907
Thyroid cancer	ieu-a-1082	rs197559	21	19362689	G	T	0.5286	0.493969	0.08473	5.02597e-09	1187	COVID-19 susceptibility	G	T	0.4809	-0.006499	0.0097754	0.5062	1683768	33.988	0.0278821
Thyroid cancer	ieu-a-1082	rs2011347	2	106907876	G	T	0.6493	0.627547	0.08816	8.28705e-13	1187	COVID-19 susceptibility	G	T	0.5157	-0.00051089	0.0094939	0.9571	1683768	50.6698	0.041006
Thyroid cancer	ieu-a-1082	rs2026912	10	91212595	A	C	0.09948	-1.08146	0.1473	2.77779e-14	1187	COVID-19 susceptibility	A	C	0.1934	-0.014325	0.012538	0.2533	1683768	53.9033	0.0435089
Thyroid cancer	ieu-a-1082	rs2044241	5	112523526	A	C	0.6889	-0.623261	0.09468	3.45621e-11	1187	COVID-19 susceptibility	A	C	0.7449	-0.027184	0.010871	0.0124	1683768	43.3335	0.0352783
Thyroid cancer	ieu-a-1082	rs2121697	2	46709607	C	A	0.387	-0.530858	0.08663	7.77499e-10	1187	COVID-19 susceptibility	C	A	0.4809	-0.007877	0.0094481	0.4044	1683768	37.5509	0.0307152
Thyroid cancer	ieu-a-1082	rs2157787	16	72928928	C	A	0.6058	2.05885	0.09758	1.30017e-108	1187	COVID-19 susceptibility	C	A	0.3412	-0.021063	0.010819	0.05156	1683768	445.172	0.273083
Thyroid cancer	ieu-a-1082	rs2236674	21	45880800	A	C	0.6228	-0.63074	0.08952	1.38899e-12	1187	COVID-19 susceptibility	A	C	0.6725	-0.011245	0.010275	0.2738	1683768	49.6433	0.0402086
Thyroid cancer	ieu-a-1082	rs2239214	14	72888427	G	A	0.2728	1.55878	0.1133	1.55418e-47	1187	COVID-19 susceptibility	G	A	0.1113	0.013386	0.01604	0.404	1683768	189.282	0.137732
Thyroid cancer	ieu-a-1082	rs2250057	9	135775203	A	C	0.407	-1.34861	0.09026	1.62892e-52	1187	COVID-19 susceptibility	A	C	0.6461	-0.012248	0.0098504	0.2137	1683768	223.245	0.158527
Thyroid cancer	ieu-a-1082	rs2336409	8	809079	C	A	0.4862	0.586119	0.08502	4.60257e-12	1187	COVID-19 susceptibility	C	A	0.3558	-0.011629	0.010069	0.2481	1683768	47.5258	0.0385597
Thyroid cancer	ieu-a-1082	rs2368105	2	181106013	T	G	0.4901	-0.54974	0.08459	7.03234e-11	1187	COVID-19 susceptibility	T	G	0.604	0.0074977	0.0095898	0.4343	1683768	42.2354	0.0344151
Thyroid cancer	ieu-a-1082	rs2414003	15	50318197	T	G	0.161	-0.740239	0.1139	4.42385e-11	1187	COVID-19 susceptibility	T	G	0.2984	-0.013648	0.010804	0.2065	1683768	42.2373	0.0344166
Thyroid cancer	ieu-a-1082	rs2452477	2	143756755	T	G	0.1425	-0.66456	0.119	1.601e-08	1187	COVID-19 susceptibility	T	G	0.1699	0.0016279	0.013003	0.9004	1683768	31.1871	0.0256433
Thyroid cancer	ieu-a-1082	rs2484667	10	44172133	C	A	0.4435	0.473747	0.08544	2.65198e-08	1187	COVID-19 susceptibility	C	A	0.382	-0.019015	0.0099684	0.05645	1683768	30.7447	0.0252888
Thyroid cancer	ieu-a-1082	rs2566511	7	150703041	T	C	0.1243	-2.49532	0.1819	3.38376e-61	1187	COVID-19 susceptibility	T	C	0.2692	0.0061204	0.011096	0.5812	1683768	188.186	0.137043
Thyroid cancer	ieu-a-1082	rs2567501	17	70711674	C	A	0.5235	2.18214	0.09786	9.31108e-122	1187	COVID-19 susceptibility	C	A	0.28	0.0044016	0.010862	0.6853	1683768	497.227	0.295577
Thyroid cancer	ieu-a-1082	rs2640734	8	27532654	T	C	0.1522	-2.21733	0.1503	1.35207e-63	1187	COVID-19 susceptibility	T	C	0.2238	-0.013199	0.011592	0.2549	1683768	217.642	0.155166
Thyroid cancer	ieu-a-1082	rs2677879	18	2547500	T	G	0.4297	-1.47622	0.0908	2.95393e-62	1187	COVID-19 susceptibility	T	G	0.6114	0.0029697	0.0099721	0.7659	1683768	264.32	0.182375
Thyroid cancer	ieu-a-1082	rs2679163	2	232816237	T	G	0.2377	-2.07227	0.1175	3.53834e-82	1187	COVID-19 susceptibility	T	G	0.3813	0.00040492	0.009967	0.9676	1683768	311.041	0.207909
Thyroid cancer	ieu-a-1082	rs26887	5	53553740	G	A	0.1822	1.93167	0.1541	3.24116e-44	1187	COVID-19 susceptibility	G	A	0.04038	0.025531	0.02544	0.3156	1683768	157.131	0.117075
Thyroid cancer	ieu-a-1082	rs2720392	7	100486035	A	C	0.3642	-0.634312	0.08724	2.71894e-13	1187	COVID-19 susceptibility	A	C	0.4992	-0.015036	0.0097499	0.123	1683768	52.8658	0.0427072
Thyroid cancer	ieu-a-1082	rs2722633	3	164384338	C	A	0.5178	0.603672	0.08513	1.07399e-12	1187	COVID-19 susceptibility	C	A	0.4677	-0.018611	0.0094836	0.04971	1683768	50.2848	0.0407071
Thyroid cancer	ieu-a-1082	rs272620	5	63815993	G	T	0.3534	0.532978	0.08958	2.29901e-09	1187	COVID-19 susceptibility	G	T	0.2939	0.009391	0.01064	0.3774	1683768	35.3994	0.0290064
Thyroid cancer	ieu-a-1082	rs2802523	13	41025396	C	A	0.5852	1.98268	0.09573	1.07152e-103	1187	COVID-19 susceptibility	C	A	0.3371	-0.015322	0.010015	0.1261	1683768	428.952	0.265778
Thyroid cancer	ieu-a-1082	rs2836836	21	40389491	T	G	0.2611	-2.21183	0.1152	1.50003e-97	1187	COVID-19 susceptibility	T	G	0.4692	0.0037669	0.010131	0.71	1683768	368.637	0.237273
Thyroid cancer	ieu-a-1082	rs28433203	1	46196813	T	G	0.09072	-2.72098	0.2341	1.28086e-49	1187	COVID-19 susceptibility	T	G	0.2475	-0.011243	0.011376	0.323	1683768	135.098	0.102339
Thyroid cancer	ieu-a-1082	rs2844353	3	37761233	G	T	0.4991	0.565314	0.08457	2.00078e-11	1187	COVID-19 susceptibility	G	T	0.3849	0.01777	0.010243	0.08278	1683768	44.6835	0.0363374
Thyroid cancer	ieu-a-1082	rs2866442	4	78558585	G	T	0.7066	1.83822	0.103	5.43125e-79	1187	COVID-19 susceptibility	G	T	0.5176	-0.0010001	0.0097541	0.9183	1683768	318.508	0.211843
Thyroid cancer	ieu-a-1082	rs2867803	7	75284941	A	C	0.4428	-0.481429	0.08448	1.11199e-08	1187	COVID-19 susceptibility	A	C	0.4637	-0.008827	0.0099479	0.3749	1683768	32.4756	0.0266745
Thyroid cancer	ieu-a-1082	rs2870132	20	38569980	A	C	0.1934	-0.584113	0.1066	3.39797e-08	1187	COVID-19 susceptibility	A	C	0.2428	-0.015018	0.011673	0.1982	1683768	30.0247	0.0247112
Thyroid cancer	ieu-a-1082	rs2885280	12	73412222	A	C	0.2278	-0.59602	0.1008	2.65601e-09	1187	COVID-19 susceptibility	A	C	0.262	0.0026578	0.01101	0.8092	1683768	34.9623	0.0286585
Thyroid cancer	ieu-a-1082	rs2973786	5	177725209	T	G	0.4283	-2.04253	0.09622	3.33426e-109	1187	COVID-19 susceptibility	T	G	0.6869	0.023318	0.010501	0.02638	1683768	450.616	0.275502
Thyroid cancer	ieu-a-1082	rs2981073	8	123467576	C	A	0.3802	0.53883	0.08884	1.119e-09	1187	COVID-19 susceptibility	C	A	0.3528	-0.010219	0.010386	0.3252	1683768	36.7863	0.0301086
Thyroid cancer	ieu-a-1082	rs30958	16	55278599	G	T	0.7539	0.539397	0.09706	2.31798e-08	1187	COVID-19 susceptibility	G	T	0.7394	-0.0043138	0.012294	0.7257	1683768	30.8842	0.0254006
Thyroid cancer	ieu-a-1082	rs3101528	8	107658187	G	T	0.7392	2.07545	0.1128	4.04017e-88	1187	COVID-19 susceptibility	G	T	0.515	0.0011581	0.0097253	0.9052	1683768	338.537	0.222205
Thyroid cancer	ieu-a-1082	rs3594	8	30535660	A	C	0.3292	-0.644167	0.08906	3.47136e-13	1187	COVID-19 susceptibility	A	C	0.3936	-0.010522	0.010341	0.3089	1683768	52.3156	0.0422816
Thyroid cancer	ieu-a-1082	rs3745720	19	48836082	C	A	0.5349	0.617483	0.08453	2.19079e-13	1187	COVID-19 susceptibility	C	A	0.4363	-0.01766	0.009537	0.06406	1683768	53.3615	0.0430904
Thyroid cancer	ieu-a-1082	rs3829647	19	52216563	G	T	0.6535	0.491023	0.08798	2.16202e-08	1187	COVID-19 susceptibility	G	T	0.539	0.00080529	0.0099809	0.9357	1683768	31.1484	0.0256123
Thyroid cancer	ieu-a-1082	rs4143816	10	50899856	T	G	0.7455	1.974	0.1095	2.92617e-83	1187	COVID-19 susceptibility	T	G	0.501	-0.0061314	0.0095261	0.5198	1683768	324.987	0.215225
Thyroid cancer	ieu-a-1082	rs4148124	21	43698255	C	A	0.6535	0.700978	0.08845	1.50314e-15	1187	COVID-19 susceptibility	C	A	0.5248	0.011466	0.01004	0.2535	1683768	62.8077	0.0503345
Thyroid cancer	ieu-a-1082	rs4233904	2	12037951	C	A	0.7303	0.626049	0.09423	2.25216e-11	1187	COVID-19 susceptibility	C	A	0.6597	-0.0092216	0.010347	0.3728	1683768	44.1406	0.0359118
Thyroid cancer	ieu-a-1082	rs4269220	4	185259670	G	T	0.5791	0.486458	0.0857	1.253e-08	1187	COVID-19 susceptibility	G	T	0.4472	-0.016868	0.0098931	0.0882	1683768	32.2203	0.0264704
Thyroid cancer	ieu-a-1082	rs4332846	19	41058802	A	C	0.5443	-0.583332	0.08519	6.21012e-12	1187	COVID-19 susceptibility	A	C	0.6347	0.0098478	0.0098625	0.318	1683768	46.8872	0.0380613
Thyroid cancer	ieu-a-1082	rs4336409	5	153093323	T	G	0.3887	-0.500545	0.08621	5.77497e-09	1187	COVID-19 susceptibility	T	G	0.4981	0.0029731	0.0094358	0.7527	1683768	33.7109	0.0276612
Thyroid cancer	ieu-a-1082	rs4648935	1	24466035	T	G	0.3463	-0.689952	0.08918	7.01617e-15	1187	COVID-19 susceptibility	T	G	0.4675	0.0073199	0.010216	0.4737	1683768	59.8553	0.0480822
Thyroid cancer	ieu-a-1082	rs4658359	1	89847372	T	G	0.8659	2.26433	0.1609	1.39701e-59	1187	COVID-19 susceptibility	T	G	0.7525	-0.002882	0.010892	0.7913	1683768	198.047	0.143196
Thyroid cancer	ieu-a-1082	rs4679695	3	152687097	C	A	0.5666	0.559841	0.085	3.82913e-11	1187	COVID-19 susceptibility	C	A	0.6029	-0.0012299	0.0096168	0.8982	1683768	43.3802	0.035315
Thyroid cancer	ieu-a-1082	rs4709487	6	161487794	T	G	0.1348	-0.755023	0.1259	1.10999e-09	1187	COVID-19 susceptibility	T	G	0.1921	0.017737	0.012085	0.1422	1683768	35.9641	0.0294555
Thyroid cancer	ieu-a-1082	rs4721443	7	15528256	G	T	0.804	0.685774	0.1056	5.39511e-11	1187	COVID-19 susceptibility	G	T	0.7791	0.01514	0.011811	0.1999	1683768	42.173	0.034366
Thyroid cancer	ieu-a-1082	rs4760566	12	129200924	C	A	0.8155	0.60991	0.1081	1.25499e-08	1187	COVID-19 susceptibility	C	A	0.7692	0.0031066	0.011628	0.7893	1683768	31.8332	0.0261607
Thyroid cancer	ieu-a-1082	rs4766901	12	118866406	T	G	0.4843	-0.496923	0.08493	4.44795e-09	1187	COVID-19 susceptibility	T	G	0.4757	-0.0044639	0.010216	0.6621	1683768	34.2339	0.0280782
Thyroid cancer	ieu-a-1082	rs4768352	12	41794490	T	G	0.3316	-0.621199	0.08952	3.04018e-12	1187	COVID-19 susceptibility	T	G	0.4537	0.011112	0.0099905	0.266	1683768	48.1528	0.0390485
Thyroid cancer	ieu-a-1082	rs4808027	19	16171361	G	T	0.23	0.614645	0.1043	2.88403e-09	1187	COVID-19 susceptibility	G	T	0.1775	0.0043772	0.012694	0.7302	1683768	34.728	0.0284719
Thyroid cancer	ieu-a-1082	rs4882110	11	48558249	T	G	0.4655	-0.600386	0.08493	1.2659e-12	1187	COVID-19 susceptibility	T	G	0.5662	0.010039	0.0096201	0.2967	1683768	49.9734	0.0404652
Thyroid cancer	ieu-a-1082	rs4884522	13	53053768	A	C	0.5282	0.694548	0.08585	4.19662e-16	1187	COVID-19 susceptibility	A	C	0.429	0.0030923	0.010087	0.7592	1683768	65.4522	0.0523428
Thyroid cancer	ieu-a-1082	rs4886485	15	76531520	C	A	0.4774	0.511026	0.08451	1.29601e-09	1187	COVID-19 susceptibility	C	A	0.4095	-0.0083132	0.010155	0.413	1683768	36.5654	0.0299332
Thyroid cancer	ieu-a-1082	rs4896219	6	137079542	A	C	0.4167	-0.540941	0.08547	2.13201e-10	1187	COVID-19 susceptibility	A	C	0.5099	0.0024561	0.0094743	0.7955	1683768	40.0564	0.0326976
Thyroid cancer	ieu-a-1082	rs4922081	8	19536790	A	C	0.2111	-2.08586	0.1254	8.20729e-75	1187	COVID-19 susceptibility	A	C	0.3709	-0.015763	0.009741	0.1056	1683768	276.678	0.189288
Thyroid cancer	ieu-a-1082	rs546583	1	57614330	C	A	0.5329	0.562997	0.08451	2.29509e-11	1187	COVID-19 susceptibility	C	A	0.3879	-0.0045013	0.010376	0.6644	1683768	44.3809	0.0361002
Thyroid cancer	ieu-a-1082	rs550201	18	43341772	C	A	0.3326	-1.99437	0.1013	4.38531e-96	1187	COVID-19 susceptibility	C	A	0.5651	-0.0087094	0.0097797	0.3732	1683768	387.608	0.246475
Thyroid cancer	ieu-a-1082	rs5749581	22	33624845	A	C	0.5209	-0.617345	0.08496	2.90469e-13	1187	COVID-19 susceptibility	A	C	0.6397	-0.013723	0.01042	0.1879	1683768	52.7991	0.0426557
Thyroid cancer	ieu-a-1082	rs576070	5	31385490	T	G	0.2377	-2.01741	0.1127	2.06681e-83	1187	COVID-19 susceptibility	T	G	0.5018	-0.0046144	0.0098782	0.6404	1683768	320.435	0.212852
Thyroid cancer	ieu-a-1082	rs6046115	20	19449317	T	G	0.4625	-0.67119	0.08508	2.23512e-15	1187	COVID-19 susceptibility	T	G	0.573	0.015372	0.0098792	0.1197	1683768	62.2352	0.0498985
Thyroid cancer	ieu-a-1082	rs6060124	20	33536897	A	C	0.1651	-0.756513	0.1134	1.35613e-11	1187	COVID-19 susceptibility	A	C	0.2779	0.0017587	0.010591	0.8681	1683768	44.5048	0.0361973
Thyroid cancer	ieu-a-1082	rs630573	11	88650737	C	A	0.708	0.604221	0.09198	3.95822e-11	1187	COVID-19 susceptibility	C	A	0.5387	0.0091792	0.0095234	0.3351	1683768	43.1524	0.035136
Thyroid cancer	ieu-a-1082	rs630695	6	117252759	G	T	0.1366	-0.770244	0.1228	1.87202e-10	1187	COVID-19 susceptibility	G	T	0.2102	-0.0038649	0.011897	0.7453	1683768	39.3423	0.0321334
Thyroid cancer	ieu-a-1082	rs638335	1	78527876	T	G	0.7619	-1.40143	0.1176	1.09396e-35	1187	COVID-19 susceptibility	T	G	0.8862	0.027116	0.015183	0.07411	1683768	142.013	0.107017
Thyroid cancer	ieu-a-1082	rs6430168	2	148121393	G	T	0.7732	0.626424	0.09948	2.223e-10	1187	COVID-19 susceptibility	G	T	0.7678	-0.022666	0.012051	0.06	1683768	39.652	0.0323782
Thyroid cancer	ieu-a-1082	rs6471521	8	96112796	C	A	0.6766	0.535973	0.08988	2.121e-09	1187	COVID-19 susceptibility	C	A	0.5435	-0.0052244	0.010066	0.6037	1683768	35.5598	0.029134
Thyroid cancer	ieu-a-1082	rs6478287	9	119947461	G	T	0.6341	2.05338	0.09882	3.80189e-106	1187	COVID-19 susceptibility	G	T	0.4416	0.0051167	0.010055	0.6108	1683768	431.767	0.267056
Thyroid cancer	ieu-a-1082	rs6487825	12	29590845	G	T	0.6451	1.92758	0.09625	1.02802e-97	1187	COVID-19 susceptibility	G	T	0.4207	-0.0009927	0.010085	0.9216	1683768	401.073	0.252872
Thyroid cancer	ieu-a-1082	rs6498272	16	12342674	T	G	0.6923	0.604404	0.09119	2.66624e-11	1187	COVID-19 susceptibility	T	G	0.5961	0.0093712	0.010285	0.3622	1683768	43.9299	0.0357465
Thyroid cancer	ieu-a-1082	rs6505863	18	13974987	C	A	0.7157	0.71335	0.09359	1.52195e-14	1187	COVID-19 susceptibility	C	A	0.5461	0.00033919	0.0097897	0.9724	1683768	58.096	0.0467349
Thyroid cancer	ieu-a-1082	rs6516819	21	29510893	G	T	0.5802	0.586088	0.08564	6.35331e-12	1187	COVID-19 susceptibility	G	T	0.485	0.0031858	0.010098	0.7524	1683768	46.8352	0.0380207
Thyroid cancer	ieu-a-1082	rs6532146	4	90166778	A	C	0.2757	-2.13707	0.1116	2.71269e-95	1187	COVID-19 susceptibility	A	C	0.5063	8.7267e-05	0.010093	0.9931	1683768	366.698	0.236321
Thyroid cancer	ieu-a-1082	rs6533109	4	104722062	C	A	0.5615	-0.492865	0.0858	8.31706e-09	1187	COVID-19 susceptibility	C	A	0.6247	-0.0022192	0.010344	0.8301	1683768	32.9975	0.0270916
Thyroid cancer	ieu-a-1082	rs6540082	16	87842141	T	G	0.5964	-0.491031	0.08694	1.45201e-08	1187	COVID-19 susceptibility	T	G	0.627	0.012786	0.01046	0.2216	1683768	31.8991	0.0262134
Thyroid cancer	ieu-a-1082	rs6546667	2	71313262	G	A	0.541	0.694148	0.08459	1.58891e-16	1187	COVID-19 susceptibility	G	A	0.4468	0.0035364	0.0098363	0.7192	1683768	67.3389	0.0537705
Thyroid cancer	ieu-a-1082	rs6565631	17	77866952	C	A	0.7751	0.601115	0.09994	1.38899e-09	1187	COVID-19 susceptibility	C	A	0.7555	0.010369	0.011318	0.3596	1683768	36.1773	0.029625
Thyroid cancer	ieu-a-1082	rs6584869	10	110225049	C	A	0.7131	0.640365	0.09282	3.81681e-12	1187	COVID-19 susceptibility	C	A	0.6899	-0.0056866	0.010261	0.5794	1683768	47.5962	0.0386146
Thyroid cancer	ieu-a-1082	rs6670601	1	192758615	C	A	0.5611	0.474333	0.08456	1.85699e-08	1187	COVID-19 susceptibility	C	A	0.4427	0.0046417	0.0098233	0.6366	1683768	31.4657	0.0258665
Thyroid cancer	ieu-a-1082	rs678476	1	5347979	A	C	0.321	-0.637902	0.09004	1.02306e-12	1187	COVID-19 susceptibility	A	C	0.461	-0.014742	0.0099154	0.1371	1683768	50.1923	0.0406352
Thyroid cancer	ieu-a-1082	rs6793262	3	17923381	G	T	0.5909	1.35712	0.08969	7.56833e-54	1187	COVID-19 susceptibility	G	T	0.4662	0.022157	0.010009	0.02685	1683768	228.954	0.161925
Thyroid cancer	ieu-a-1082	rs6827297	4	135554935	G	T	0.728	0.721547	0.09454	1.38007e-14	1187	COVID-19 susceptibility	G	T	0.6959	0.012008	0.010212	0.2397	1683768	58.2503	0.0468532
Thyroid cancer	ieu-a-1082	rs6828245	4	25993373	A	C	0.3991	-0.69535	0.08646	6.04088e-16	1187	COVID-19 susceptibility	A	C	0.4892	-0.012213	0.01005	0.2243	1683768	64.681	0.051758
Thyroid cancer	ieu-a-1082	rs6870385	5	27559659	C	A	0.6872	0.501536	0.08994	2.174e-08	1187	COVID-19 susceptibility	C	A	0.6456	0.0078699	0.0098441	0.424	1683768	31.0956	0.02557
Thyroid cancer	ieu-a-1082	rs6937429	6	66021416	G	T	0.6614	0.531369	0.08824	1.48799e-09	1187	COVID-19 susceptibility	G	T	0.6013	-0.0018667	0.0097123	0.8476	1683768	36.2628	0.0296929
Thyroid cancer	ieu-a-1082	rs6946868	7	83795479	C	A	0.2749	-2.01741	0.1086	3.50671e-88	1187	COVID-19 susceptibility	C	A	0.5067	0.00085725	0.0097789	0.9301	1683768	345.087	0.225534
Thyroid cancer	ieu-a-1082	rs6949292	7	16440023	A	C	0.2968	-0.537341	0.09206	4.55198e-09	1187	COVID-19 susceptibility	A	C	0.4085	-0.013296	0.0099366	0.1809	1683768	34.0689	0.0279467
Thyroid cancer	ieu-a-1082	rs6951443	7	66672143	A	C	0.5835	-0.528273	0.08707	1.13999e-09	1187	COVID-19 susceptibility	A	C	0.5737	0.0053089	0.010112	0.5996	1683768	36.8112	0.0301284
Thyroid cancer	ieu-a-1082	rs698171	5	127156760	C	A	0.5923	1.91122	0.09431	6.95665e-99	1187	COVID-19 susceptibility	C	A	0.2982	0.0041973	0.011126	0.706	1683768	410.682	0.257371
Thyroid cancer	ieu-a-1082	rs6984781	8	13613335	G	T	0.2732	0.622725	0.09803	1.58701e-10	1187	COVID-19 susceptibility	G	T	0.187	0.0036701	0.011932	0.7584	1683768	40.3529	0.0329316
Thyroid cancer	ieu-a-1082	rs7034893	9	5494438	C	T	0.1582	-1.93033	0.1346	4.67197e-56	1187	COVID-19 susceptibility	C	T	0.2921	-0.016275	0.010719	0.1289	1683768	205.671	0.147893
Thyroid cancer	ieu-a-1082	rs711943	3	135110411	C	A	0.5215	0.461718	0.08438	4.142e-08	1187	COVID-19 susceptibility	C	A	0.5663	-0.007501	0.010052	0.4555	1683768	29.9416	0.0246445
Thyroid cancer	ieu-a-1082	rs7186875	16	55883761	C	A	0.7331	0.578391	0.09559	1.16399e-09	1187	COVID-19 susceptibility	C	A	0.7241	0.0019296	0.011011	0.8609	1683768	36.6116	0.0299699
Thyroid cancer	ieu-a-1082	rs7188594	16	83214480	A	C	0.3056	-0.563523	0.09117	5.25497e-10	1187	COVID-19 susceptibility	A	C	0.381	-0.0093783	0.010291	0.3621	1683768	38.2049	0.0312335
Thyroid cancer	ieu-a-1082	rs7234149	18	31285269	C	A	0.7336	1.91596	0.108	1.02589e-79	1187	COVID-19 susceptibility	C	A	0.5828	0.010655	0.0098072	0.2773	1683768	314.721	0.209853
Thyroid cancer	ieu-a-1082	rs7294444	12	13101454	T	G	0.4271	-0.63036	0.08486	8.53493e-14	1187	COVID-19 susceptibility	T	G	0.6094	-0.0035191	0.01026	0.7316	1683768	55.1787	0.0444925
Thyroid cancer	ieu-a-1082	rs7301555	12	85399747	T	G	0.06687	-3.81263	0.4569	2.86484e-43	1187	COVID-19 susceptibility	T	G	0.1681	0.0023861	0.013962	0.8643	1683768	69.6317	0.0554997
Thyroid cancer	ieu-a-1082	rs7528076	1	218361784	A	C	0.365	-0.568278	0.08718	5.91834e-11	1187	COVID-19 susceptibility	A	C	0.375	0.028851	0.010339	0.005261	1683768	42.4901	0.0346154
Thyroid cancer	ieu-a-1082	rs754038	10	71300334	C	A	0.5172	1.29755	0.08914	1.04689e-49	1187	COVID-19 susceptibility	C	A	0.3746	-0.0067564	0.010265	0.5104	1683768	211.886	0.151685
Thyroid cancer	ieu-a-1082	rs7623609	3	133887637	T	G	0.6773	0.492167	0.08971	3.67401e-08	1187	COVID-19 susceptibility	T	G	0.5277	-0.0089791	0.010199	0.3786	1683768	30.0984	0.0247703
Thyroid cancer	ieu-a-1082	rs7735978	5	103376332	A	C	0.1176	-2.56525	0.1992	5.06407e-56	1187	COVID-19 susceptibility	A	C	0.2169	0.0057093	0.011634	0.6236	1683768	165.837	0.122766
Thyroid cancer	ieu-a-1082	rs7781839	7	144277757	A	C	0.5728	-0.489193	0.0858	1.06101e-08	1187	COVID-19 susceptibility	A	C	0.5758	0.016107	0.0099672	0.1061	1683768	32.5077	0.0267002
Thyroid cancer	ieu-a-1082	rs7823055	8	55511676	T	G	0.3783	-1.84137	0.09437	1.16788e-91	1187	COVID-19 susceptibility	T	G	0.5671	0.00035349	0.010249	0.9725	1683768	380.727	0.243163
Thyroid cancer	ieu-a-1082	rs7848973	9	100588839	G	A	0.527	-0.555034	0.08441	4.12477e-11	1187	COVID-19 susceptibility	G	A	0.6017	-0.010612	0.0096228	0.2701	1683768	43.2366	0.0352022
Thyroid cancer	ieu-a-1082	rs7849585	9	139111870	T	G	0.2498	-0.621943	0.09684	9.93802e-11	1187	COVID-19 susceptibility	T	G	0.3277	-0.00073797	0.010071	0.9416	1683768	41.2469	0.0336367
Thyroid cancer	ieu-a-1082	rs7858672	9	2224135	G	T	0.6538	0.523911	0.08892	3.36403e-09	1187	COVID-19 susceptibility	G	T	0.4777	0.016933	0.0097967	0.08392	1683768	34.7149	0.0284615
Thyroid cancer	ieu-a-1082	rs7866443	9	119179876	A	C	0.1795	-0.622689	0.1092	8.72007e-09	1187	COVID-19 susceptibility	A	C	0.2501	-0.0049235	0.011295	0.6629	1683768	32.516	0.0267068
Thyroid cancer	ieu-a-1082	rs7869617	9	113060439	C	A	0.5094	0.47965	0.08421	1.12899e-08	1187	COVID-19 susceptibility	C	A	0.4257	-0.0010866	0.0095491	0.9094	1683768	32.443	0.0266485
Thyroid cancer	ieu-a-1082	rs7904993	10	13863721	C	T	0.2352	1.36226	0.1168	4.46889e-34	1187	COVID-19 susceptibility	C	T	0.1409	0.03208	0.014316	0.02504	1683768	136.03	0.102973
Thyroid cancer	ieu-a-1082	rs7907903	10	1765025	T	G	0.5648	-0.599386	0.08663	3.76964e-12	1187	COVID-19 susceptibility	T	G	0.6697	-0.0092846	0.010071	0.3566	1683768	47.8714	0.0388292
Thyroid cancer	ieu-a-1082	rs7985861	13	69598658	A	C	0.3475	-0.606236	0.08811	4.70544e-12	1187	COVID-19 susceptibility	A	C	0.3256	-0.0022907	0.0099809	0.8185	1683768	47.3405	0.0384151
Thyroid cancer	ieu-a-1082	rs7998196	13	91515582	G	T	0.6353	-0.657002	0.09026	2.41991e-13	1187	COVID-19 susceptibility	G	T	0.7364	-0.0019813	0.010935	0.8562	1683768	52.9838	0.0427984
Thyroid cancer	ieu-a-1082	rs8007859	14	69704553	T	G	0.6104	0.542144	0.08611	2.651e-10	1187	COVID-19 susceptibility	T	G	0.6229	0.012438	0.0097593	0.2025	1683768	39.6389	0.0323679
Thyroid cancer	ieu-a-1082	rs8019424	14	22491095	G	T	0.5314	0.61804	0.08528	3.3861e-13	1187	COVID-19 susceptibility	G	T	0.5148	0.017556	0.0096228	0.06809	1683768	52.5217	0.042441
Thyroid cancer	ieu-a-1082	rs8062459	16	88934674	G	A	0.122	2.82197	0.2692	7.6542e-43	1187	COVID-19 susceptibility	G	A	0.02667	0.012127	0.033042	0.7136	1683768	109.889	0.0848637
Thyroid cancer	ieu-a-1082	rs8076927	17	60171809	G	T	0.5835	0.472567	0.08544	2.94002e-08	1187	COVID-19 susceptibility	G	T	0.5839	0.016949	0.0098806	0.08628	1683768	30.5917	0.0251661
Thyroid cancer	ieu-a-1082	rs8095811	18	2419068	G	T	0.05434	-2.12528	0.2471	6.03532e-24	1187	COVID-19 susceptibility	G	T	0.1447	0.019412	0.013663	0.1554	1683768	73.9753	0.0587584
Thyroid cancer	ieu-a-1082	rs825770	5	138115219	G	T	0.7904	0.599111	0.1021	3.378e-09	1187	COVID-19 susceptibility	G	T	0.6815	-0.0091821	0.011646	0.4304	1683768	34.4321	0.0282362
Thyroid cancer	ieu-a-1082	rs886856	20	52556084	G	T	0.2842	-0.567572	0.09254	7.01197e-10	1187	COVID-19 susceptibility	G	T	0.3673	0.0043086	0.01019	0.6724	1683768	37.6169	0.0307675
Thyroid cancer	ieu-a-1082	rs895649	11	119751585	G	A	0.3754	1.18111	0.0962	3.95913e-36	1187	COVID-19 susceptibility	G	A	0.4419	0.020798	0.010175	0.04096	1683768	150.741	0.112852
Thyroid cancer	ieu-a-1082	rs9289086	3	117425366	C	A	0.3285	0.65959	0.09295	8.93923e-13	1187	COVID-19 susceptibility	C	A	0.1894	0.0059012	0.012659	0.6411	1683768	50.3558	0.0407622
Thyroid cancer	ieu-a-1082	rs9290550	3	175096546	T	G	0.25	-0.603489	0.09614	2.64801e-10	1187	COVID-19 susceptibility	T	G	0.3318	0.021507	0.01045	0.03958	1683768	39.4031	0.0321815
Thyroid cancer	ieu-a-1082	rs9294379	6	88152535	A	C	0.74	2.1698	0.1138	8.12082e-96	1187	COVID-19 susceptibility	A	C	0.5606	-0.013924	0.0094999	0.1427	1683768	363.542	0.234764
Thyroid cancer	ieu-a-1082	rs9297398	8	108647423	C	A	0.2131	-2.01741	0.1195	1.45111e-75	1187	COVID-19 susceptibility	C	A	0.372	-0.0051259	0.010105	0.612	1683768	285.005	0.19388
Thyroid cancer	ieu-a-1082	rs929958	4	37769060	A	C	0.4672	-0.474494	0.08412	1.55901e-08	1187	COVID-19 susceptibility	A	C	0.556	0.0039524	0.0097621	0.6856	1683768	31.8173	0.0261479
Thyroid cancer	ieu-a-1082	rs9325969	22	49215103	T	G	0.4614	-0.501536	0.08487	3.11903e-09	1187	COVID-19 susceptibility	T	G	0.573	0.0068811	0.00977	0.4812	1683768	34.9217	0.0286262
Thyroid cancer	ieu-a-1082	rs9344740	6	88619412	T	G	0.5823	-0.581657	0.08668	1.60214e-11	1187	COVID-19 susceptibility	T	G	0.6968	0.0050459	0.010652	0.6357	1683768	45.0294	0.0366084
Thyroid cancer	ieu-a-1082	rs9350030	6	17122836	G	T	0.3271	0.604316	0.09255	5.19159e-11	1187	COVID-19 susceptibility	G	T	0.2282	0.014105	0.011501	0.2201	1683768	42.6359	0.0347301
Thyroid cancer	ieu-a-1082	rs935990	11	133089795	C	A	0.6852	0.733761	0.09027	2.55682e-16	1187	COVID-19 susceptibility	C	A	0.5731	0.0067233	0.010337	0.5154	1683768	66.0727	0.0528129
Thyroid cancer	ieu-a-1082	rs9386492	6	106368709	A	C	0.3493	-0.481591	0.08765	3.57602e-08	1187	COVID-19 susceptibility	A	C	0.438	0.007268	0.0095505	0.4467	1683768	30.1893	0.0248433
Thyroid cancer	ieu-a-1082	rs9406232	6	9079324	A	C	0.3315	-0.529159	0.08864	2.05698e-09	1187	COVID-19 susceptibility	A	C	0.3659	-0.004841	0.010408	0.6419	1683768	35.638	0.0291962
Thyroid cancer	ieu-a-1082	rs9464641	6	14038947	G	T	0.1779	2.08989	0.1644	2.32006e-47	1187	COVID-19 susceptibility	G	T	0.0496	0.010654	0.023125	0.645	1683768	161.601	0.120006
Thyroid cancer	ieu-a-1082	rs950275	10	49897219	A	C	0.2718	-0.869407	0.09534	2.64789e-20	1187	COVID-19 susceptibility	A	C	0.2791	0.0030362	0.01053	0.7731	1683768	83.1565	0.0655727
Thyroid cancer	ieu-a-1082	rs9516234	13	94100353	C	A	0.7173	0.654504	0.09342	1.72982e-12	1187	COVID-19 susceptibility	C	A	0.6431	-0.0076992	0.0098266	0.4333	1683768	49.0846	0.0397741
Thyroid cancer	ieu-a-1082	rs9537154	13	56100889	A	C	0.2007	-0.578569	0.1041	2.20201e-08	1187	COVID-19 susceptibility	A	C	0.269	-0.024264	0.010615	0.02226	1683768	30.8894	0.0254047
Thyroid cancer	ieu-a-1082	rs9547491	13	36947826	G	T	0.6858	0.543693	0.0897	1.15499e-09	1187	COVID-19 susceptibility	G	T	0.6404	-0.014301	0.010185	0.1603	1683768	36.7386	0.0300708
Thyroid cancer	ieu-a-1082	rs9558058	13	104012768	T	G	0.1105	-2.65073	0.2053	4.12572e-58	1187	COVID-19 susceptibility	T	G	0.3092	-0.0057029	0.012204	0.6403	1683768	166.707	0.123331
Thyroid cancer	ieu-a-1082	rs9655048	7	5167160	A	C	0.3583	-0.594026	0.08777	1.05196e-11	1187	COVID-19 susceptibility	A	C	0.4449	-0.0007218	0.010192	0.9435	1683768	45.8056	0.037216
Thyroid cancer	ieu-a-1082	rs971732	2	50142117	C	A	0.2351	-2.13877	0.1195	1.0639e-85	1187	COVID-19 susceptibility	C	A	0.3683	0.010232	0.010051	0.3087	1683768	320.326	0.212795
Thyroid cancer	ieu-a-1082	rs9824256	3	113815108	C	A	0.6534	0.507498	0.08745	5.77697e-09	1187	COVID-19 susceptibility	C	A	0.6398	0.0080707	0.0098157	0.4109	1683768	33.6782	0.027635
Thyroid cancer	ieu-a-1082	rs9869760	3	119233558	A	C	0.2937	-2.0526	0.1062	8.74178e-95	1187	COVID-19 susceptibility	A	C	0.5877	0.0041507	0.0095749	0.6647	1683768	373.559	0.239682
Thyroid cancer	ieu-a-1082	rs9889777	17	49336793	C	A	0.6923	0.514834	0.09111	1.39901e-08	1187	COVID-19 susceptibility	C	A	0.5659	0.00084169	0.0099005	0.9322	1683768	31.9303	0.0262384
Thyroid cancer	ieu-a-1082	rs9988716	10	82715404	A	C	0.1627	-0.673737	0.113	1.639e-09	1187	COVID-19 susceptibility	A	C	0.2265	0.012197	0.011627	0.2942	1683768	35.5487	0.0291252
Ovarian cancer	ieu-a-1120	rs10962691	9	16915105	G	C	0.2026	-0.2133	0.01698	1.72783e-36	66450	COVID-19 susceptibility	G	C	0.2162	-0.0067672	0.011701	0.563	1683768	157.8	0.00236916
Ovarian cancer	ieu-a-1120	rs115478735	9	136149711	T	A	0.1936	0.09941	0.01672	2.80098e-09	66450	COVID-19 susceptibility	T	A	0.1934	0.10483	0.01367	1.742e-14	1683768	35.3499	0.00053171
Ovarian cancer	ieu-a-1120	rs11782652	8	82653644	G	A	0.06811	0.1524	0.02508	1.25101e-09	66450	COVID-19 susceptibility	G	A	0.07177	0.012494	0.01854	0.5004	1683768	36.9245	0.000555382
Ovarian cancer	ieu-a-1120	rs12952824	17	46478195	A	C	0.2171	0.1033	0.0157	4.91021e-11	66450	COVID-19 susceptibility	A	C	0.2242	0.0068832	0.011394	0.5458	1683768	43.2914	0.000651083
Ovarian cancer	ieu-a-1120	rs4808075	19	17390291	C	T	0.296	0.1224	0.01437	1.53886e-17	66450	COVID-19 susceptibility	C	T	0.3009	-0.0046506	0.010402	0.6548	1683768	72.552	0.00109067
Ovarian cancer	ieu-a-1120	rs62276619	3	156397692	T	C	0.04882	0.37	0.0284	5.53478e-39	66450	COVID-19 susceptibility	T	C	0.06837	-0.043768	0.02104	0.0375	1683768	169.733	0.00254787
Ovarian cancer	ieu-a-1120	rs6496746	15	91532869	A	C	0.1762	-0.095	0.01735	4.18398e-08	66450	COVID-19 susceptibility	A	C	0.1857	-0.00077531	0.012208	0.9494	1683768	29.9811	0.000450994
Ovarian cancer	ieu-a-1120	rs7084454	10	21821274	A	G	0.3279	0.08833	0.01395	2.40802e-10	66450	COVID-19 susceptibility	A	G	0.3195	-0.014198	0.010051	0.1578	1683768	40.093	0.00060301
Ovarian cancer	ieu-a-1120	rs71238846	17	43552537	A	G	0.1825	0.1269	0.01693	6.59022e-14	66450	COVID-19 susceptibility	A	G	0.1519	-0.041838	0.01268	0.0009682	1683768	56.1836	0.000844813
Melanoma	ieu-b-4969	rs11120349	1	214718513	T	A	0.20584	-0.00165893	0.000285342	6.1e-09	375767	COVID-19 susceptibility	T	A	0.1947	0.00015473	0.012322	0.99	1683768	33.8006	8.99434e-05
Melanoma	ieu-b-4969	rs1126809	11	89017961	A	G	0.302059	0.00203828	0.000250011	3.59998e-16	375767	COVID-19 susceptibility	A	G	0.2719	-0.0054041	0.010595	0.61	1683768	66.4675	0.000176855
Melanoma	ieu-b-4969	rs183783391	3	69950451	T	C	0.013683	0.00693872	0.0010097	6.29941e-12	375767	COVID-19 susceptibility	T	C	0.01687	-0.0024868	0.047588	0.9583	1683768	47.2252	0.000125662
Melanoma	ieu-b-4969	rs6059655	20	32665748	G	A	0.898713	-0.00383327	0.000386784	3.69999e-23	375767	COVID-19 susceptibility	G	A	0.9229	-0.05559	0.018851	0.003189	1683768	98.2204	0.00026132
Melanoma	ieu-b-4969	rs74415461	16	89990843	T	C	0.084956	0.00387347	0.000413323	7.10068e-21	375767	COVID-19 susceptibility	T	C	0.09247	-0.004417	0.017573	0.8015	1683768	87.8256	0.00023367
Melanoma	ieu-b-4969	rs871024	9	21803880	A	C	0.519167	-0.00189312	0.000229871	1.80011e-16	375767	COVID-19 susceptibility	A	C	0.5308	0.014095	0.0097226	0.1471	1683768	67.8247	0.000180465
Small bowel cancer	ukb-a-56	rs113335353	3	78658935	A	G	0.0394025	0.000763737	0.0001376	2.85213e-08	337159	COVID-19 susceptibility	A	G	0.04166	-0.0039873	0.026165	0.8789	1683768	30.8071	9.13648e-05
Small bowel cancer	ukb-a-56	rs145192708	6	86605453	G	T	0.0103396	0.00145705	0.00026503	3.8507e-08	337159	COVID-19 susceptibility	G	T	0.01586	0.078562	0.053611	0.1428	1683768	30.2245	8.96371e-05
Small bowel cancer	ukb-a-56	rs147636075	2	101734199	G	C	0.0215511	0.00103181	0.000189198	4.93856e-08	337159	COVID-19 susceptibility	G	C	0.03007	0.072284	0.041188	0.07926	1683768	29.7417	8.82055e-05
Small bowel cancer	ukb-a-56	rs77933629	9	113137872	T	C	0.0348044	0.000827805	0.000143209	7.45968e-09	337159	COVID-19 susceptibility	T	C	0.03916	-0.0048785	0.026569	0.8543	1683768	33.413	9.90924e-05
Colorectal cancer	ieu-b-4965	rs114717436	3	28450527	G	A	0.010823	0.00795214	0.00139467	1.2e-08	377673	COVID-19 susceptibility	G	A	0.008987	0.078995	0.05374	0.1416	1683768	32.5106	8.60744e-05
Colorectal cancer	ieu-b-4965	rs12135286	1	222218761	T	C	0.193449	0.00203311	0.000354166	9.40005e-09	377673	COVID-19 susceptibility	T	C	0.2034	0.00014627	0.012045	0.9903	1683768	32.954	8.72482e-05
Colorectal cancer	ieu-b-4965	rs16892766	8	117630683	C	A	0.079541	0.00305526	0.000516081	3.2e-09	377673	COVID-19 susceptibility	C	A	0.09801	0.020861	0.017	0.2198	1683768	35.0478	9.27912e-05
Colorectal cancer	ieu-b-4965	rs3087967	11	111156836	C	T	0.69919	-0.00207534	0.000305631	1.10002e-11	377673	COVID-19 susceptibility	C	T	0.7078	-0.0021794	0.010726	0.839	1683768	46.1088	0.000122072
Colorectal cancer	ieu-b-4965	rs58658771	15	33001734	A	T	0.180335	0.00280944	0.000364099	1.20005e-14	377673	COVID-19 susceptibility	A	T	0.2016	0.022738	0.012065	0.05948	1683768	59.5389	0.000157623
Colorectal cancer	ieu-b-4965	rs6983267	8	128413305	T	G	0.482388	-0.0026797	0.00027963	9.3994e-22	377673	COVID-19 susceptibility	T	G	0.4772	0.015075	0.0094287	0.1099	1683768	91.8343	0.0002431
Colorectal cancer	ieu-b-4965	rs72746180	5	40240420	C	A	0.298345	0.00170489	0.000305954	2.5e-08	377673	COVID-19 susceptibility	C	A	0.2811	0.0057193	0.010423	0.5832	1683768	31.0513	8.22112e-05
Oropharyngeal cancer	ieu-b-4968	rs117554022	9	7309731	G	C	0.030036	0.0015421	0.000255911	1.7e-09	372510	COVID-19 susceptibility	G	C	0.03301	-0.012792	0.033337	0.7012	1683768	36.3117	9.74696e-05
Oropharyngeal cancer	ieu-b-4968	rs586610	6	32572311	C	T	0.303991	0.000547998	9.4417e-05	6.49995e-09	372510	COVID-19 susceptibility	C	T	0.2762	0.00026806	0.011625	0.9816	1683768	33.6866	9.04238e-05
Lymphoma	ukb-d-C_LYMPHOMA	rs4713570	6	32626040	T	C	0.268475	0.00142862	0.000184386	9.36052e-15	361194	COVID-19 susceptibility	T	C	0.2518	-0.0034134	0.012099	0.7778	1683768	60.0313	0.000166176
Lymphoma	ukb-d-C_LYMPHOMA	rs59065116	11	118680702	TA	T	0.210445	0.00115534	0.000200998	9.03649e-09	361194	COVID-19 susceptibility	TA	T	0.2136	-0.014582	0.013103	0.2658	1683768	33.0397	9.14657e-05
Cervix cancer	ukb-b-918	rs4713462	6	31347816	A	G	0.260802	-0.00124106	0.000194121	1.6e-10	463010	COVID-19 susceptibility	A	G	0.3085	-0.018379	0.010364	0.07616	1683768	40.8734	8.82701e-05
Cervix cancer	ukb-b-918	rs9272226	6	32602396	T	C	0.631131	-0.00155897	0.000173586	2.70023e-19	463010	COVID-19 susceptibility	T	C	0.6356	0.032098	0.010271	0.001777	1683768	80.6578	0.000174173
